# Supplementary material for: Functional genomics study of protein inhibitor of activated STAT1 in mouse hippocampal neuronal cells revealed by RNA sequencing
Source: Aging (Albany NY). 2021 Mar 24;13(6):9011–27. doi: 10.18632/aging.202749 (PMC8034905; doi:10.18632/aging.202749)
Supplement: Supplementary Table 1 [file aging-13-202749-s001.xls]

## Sheet: Down
Ensemble_ID	Name	baseMean	baseMeanA	baseMeanB	foldChange	log2FoldChange	pval	padj	Chromosome	Start Site	End Site	Direction	Length	GO	KEGG	EC	eggNOG Class	eggNOG	Description	NCBI_GI	UniProtID
ENSMUSG00000051243	Islr2	9.2947	18.0681	0.521307	0.0288524	-5.11517	8.52353e-05	0.00352183	9	58196297	58204319	-	5921	GO:0005515;GO:0016020;GO:0016021;GO:0005515;GO:0005515;GO:0005886;GO:0007275;GO:0007399;GO:0009986;GO:0009986;GO:0016020;GO:0016021;GO:0045773;GO:0045773;GO:0005515;GO:0005515;GO:0005886;GO:0007275;GO:0007399;GO:0009986;GO:0009986;GO:0016020;GO:0016021;GO:0045773;GO:0045773;GO:0005515;GO:0005515;GO:0005886;GO:0007275;GO:0007399;GO:0009986;GO:0009986;GO:0016020;GO:0016021;GO:0045773;GO:0045773;GO:…	-	-	NOG240332	-	immunoglobulin superfamily containing leucine-richrepeat 2 [Source:MGI Symbol;Acc:MGI:2444277]	320563	Q5RKR3
ENSMUSG00000046108	Il17c	7.57817	14.662	0.494356	0.0337169	-4.89039	0.000639028	0.0167805	8	122422020	122423639	+	719	GO:0005125;GO:0005125;GO:0005576;GO:0005576;GO:0006954;GO:0006954;GO:0007165;	K05491	-	-	-	interleukin 17C [Source:MGISymbol;Acc:MGI:2446486]	234836	Q8K4C5
ENSMUSG00000038418	Egr1	3462.9	6695.32	230.485	0.0344248	-4.86041	3.25609e-118	2.60357e-114	18	34859823	34864984	+	4484	GO:0000122;GO:0000976;GO:0000976;GO:0000977;GO:0000977;GO:0000977;GO:0000977;GO:0000979;GO:0000981;GO:0000981;GO:0001228;GO:0001228;GO:0001228;GO:0001666;GO:0002931;GO:0002931;GO:0003676;GO:0003676;GO:0003677;GO:0003677;GO:0003677;GO:0003690;GO:0003700;GO:0003700;GO:0003700;GO:0005634;GO:0005634;GO:0005634;GO:0005634;GO:0005654;GO:0005654;GO:0005737;GO:0005737;GO:0005737;GO:0006355;GO:0006357;GO:…	K09203	-	COG5048	R	early growth response 1 [Source:MGISymbol;Acc:MGI:95295]	13653	P08046;Q544D6;Q8CAT6
ENSMUSG00000027505	Fam209	7.10634	13.7183	0.494356	0.0360362	-4.79441	0.0011201	0.0255629	2	172472520	172474331	+	698	GO:0003674;GO:0008150;GO:0016020;GO:0016021;	-	-	NOG38914	S	family with sequence similarity 209 [Source:MGISymbol;Acc:MGI:1923676]	76426	A2APA5
ENSMUSG00000045555	Mettl24	6.86042	13.1995	0.521307	0.0394943	-4.66221	0.00148864	0.0310787	10	40683282	40811083	+	1529	GO:0003674;GO:0005575;GO:0005576;GO:0008150;GO:0008168;GO:0016740;GO:0032259;	-	-	NOG40026	S	methyltransferase like 24 [Source:MGISymbol;Acc:MGI:3045338]	327747	Q8CCB5
ENSMUSG00000042708	Shcbp1l	11.796	22.5493	1.04261	0.0462371	-4.43481	2.46578e-05	0.00126065	1	153425162	153452574	+	3710	GO:0005515;GO:0005515;GO:0005737;GO:0005819;GO:0005856;GO:0007283;GO:0030154;GO:0072687;GO:2001252;	-	-	NOG119196	S	Shc SH2-domain binding protein 1-like [Source:MGISymbol;Acc:MGI:1919086]	71836	Q3TTP0
ENSMUSG00000020098	Pcbd1	4.95023	9.40611	0.494356	0.0525569	-4.24998	0.0351942	0.264018	10	61089331	61094324	+	817	GO:0006729;GO:0006729;GO:0008124;GO:0008124;GO:0003713;GO:0003713;GO:0004505;GO:0005515;GO:0005634;GO:0005634;GO:0005634;GO:0005634;GO:0005654;GO:0005654;GO:0005737;GO:0005829;GO:0005829;GO:0006558;GO:0006558;GO:0006729;GO:0006729;GO:0006729;GO:0008124;GO:0008124;GO:0008124;GO:0008124;GO:0008124;GO:0016829;GO:0042802;GO:0042802;GO:0043496;GO:0043496;GO:0045893;GO:0045893;GO:0051289;GO:0051291;GO:…	K01724	EC:4.2.1.96	COG2154	H	pterin 4 alpha carbinolaminedehydratase/dimerization cofactor of hepatocyte nuclearfactor 1 alpha (TCF1) 1 [Source:MGI Symbol;Acc:MGI:94873]	13180	P61458
ENSMUSG00000001155	Ftcd	5.14798	9.77466	0.521307	0.0533325	-4.22884	0.0105846	0.123284	10	76575648	76590338	+	3192	GO:0000139;GO:0000139;GO:0000139;GO:0003824;GO:0003824;GO:0003824;GO:0005542;GO:0005542;GO:0005542;GO:0005737;GO:0005783;GO:0005783;GO:0005793;GO:0005793;GO:0005794;GO:0005794;GO:0005794;GO:0005814;GO:0005829;GO:0005829;GO:0005856;GO:0005886;GO:0005886;GO:0006547;GO:0006548;GO:0007010;GO:0007010;GO:0008017;GO:0008017;GO:0008017;GO:0008152;GO:0016740;GO:0016740;GO:0016740;GO:0016829;GO:0019556;GO:…	K13990	-	COG3404	E	formiminotransferase cyclodeaminase [Source:MGISymbol;Acc:MGI:1339962]	14317	Q91XD4
ENSMUSG00000091649	Phf11b	9.53657	18.0305	1.04261	0.0578249	-4.11216	0.0011222	0.0255629	14	59320964	59341351	-	1184	GO:0003674;GO:0005654;GO:0008150;GO:0031965;GO:0046872;	-	-	-	-	PHD finger protein 11B [Source:MGISymbol;Acc:MGI:3645789]	236451	B4XVQ1
ENSMUSG00000058163	Gm5431	4.16267	7.83099	0.494356	0.0631282	-3.98557	0.0317026	0.247794	11	48887422	48902214	-	3862	GO:0003924;GO:0005525;GO:0005525;GO:0005789;GO:0006952;GO:0016020;GO:0016020;GO:0035458;GO:0003924;GO:0005525;GO:0005525;GO:0005789;GO:0006952;GO:0016020;GO:0016020;GO:0035458;GO:0003924;GO:0005525;GO:0005525;GO:0005789;GO:0006952;GO:0016020;GO:0016020;GO:0035458;	K17072	-	NOG84668	R	predicted gene 5431 [Source:MGISymbol;Acc:MGI:3645205]	432555	Q3TMS7;A6PWD6
ENSMUSG00000100486	Gm4131	3.95023	7.40611	0.494356	0.0667498	-3.90509	0.0409458	0.289324	14	62463414	62566921	-	1878	GO:0003674;GO:0005575;GO:0008150;	-	-	-	-	predicted gene 4131 [Source:MGISymbol;Acc:MGI:3782307]	100042960	-
ENSMUSG00000024530	Prelid3a	3.92206	7.34977	0.494356	0.0672614	-3.89408	0.0414304	0.290616	18	67464866	67479835	+	3201	GO:0005739;GO:0005739;GO:0005758;GO:0005758;GO:0005758;GO:0006869;GO:0015914;GO:0015914;GO:0015914;GO:1990050;GO:1990050;GO:1990050;GO:0005758;	-	-	NOG320532	-	PRELI domain containing 3A [Source:MGISymbol;Acc:MGI:2442865]	225655	Q8VE85
ENSMUSG00000041293	Adgrf1	3.91267	7.33099	0.494356	0.0674337	-3.89039	0.0415939	0.291045	17	43270329	43324737	+	3853	GO:0004888;GO:0004888;GO:0004930;GO:0004930;GO:0004930;GO:0004930;GO:0005515;GO:0005886;GO:0005886;GO:0007165;GO:0007166;GO:0007166;GO:0007186;GO:0007186;GO:0007186;GO:0007189;GO:0007416;GO:0007613;GO:0016020;GO:0016020;GO:0016020;GO:0016021;GO:0016021;GO:0016021;GO:0031175;GO:0032793;	K08453	-	NOG235397	-	adhesion G protein-coupled receptor F1 [Source:MGISymbol;Acc:MGI:1924846]	77596	Q8VEC3
ENSMUSG00000037962	Rflna	7.8523	14.662	1.04261	0.0711101	-3.8138	0.00188643	0.0366558	5	125003221	125012547	+	1940	GO:0005737;GO:0005856;GO:0031005;GO:0031005;GO:0031005;GO:0031005;GO:0032432;GO:0032432;GO:0048705;GO:0048705;GO:0061181;GO:0061181;GO:0061182;GO:0061182;GO:0061572;GO:0061572;GO:0061572;GO:0061572;GO:1900158;GO:1900158;GO:0005737;GO:0005856;GO:0031005;GO:0031005;GO:0031005;GO:0031005;GO:0032432;GO:0032432;GO:0048705;GO:0048705;GO:0061181;GO:0061181;GO:0061182;GO:0061182;GO:0061572;GO:0061572;GO:…	-	-	NOG46806	R	refilin A [Source:MGI Symbol;Acc:MGI:1920371]"	73121	Q7TS73
ENSMUSG00000024936	Kcnk7	17.9999	33.4742	2.52568	0.0754516	-3.7283	1.75688e-06	0.000136439	19	5704367	5707109	+	1566	GO:0005267;GO:0005267;GO:0005267;GO:0006811;GO:0006813;GO:0016020;GO:0016020;GO:0016020;GO:0016021;GO:0016021;GO:0016021;GO:0071805;GO:0071805;GO:0071805;	K04918	-	-	-	potassium channel, subfamily K, member 7[Source:MGI Symbol;Acc:MGI:1341841]	16530	Q9Z2T1;Q9JJ14
ENSMUSG00000030793	Pycard	18.1507	33.7489	2.55263	0.0756362	-3.72478	1.41591e-06	0.00011436	7	127989708	127993867	-	3800	GO:0000139;GO:0000139;GO:0001773;GO:0001773;GO:0002020;GO:0002020;GO:0002020;GO:0002218;GO:0002218;GO:0002218;GO:0002230;GO:0002277;GO:0002376;GO:0002588;GO:0002821;GO:0002821;GO:0004197;GO:0004197;GO:0005138;GO:0005138;GO:0005515;GO:0005515;GO:0005523;GO:0005523;GO:0005576;GO:0005634;GO:0005634;GO:0005634;GO:0005634;GO:0005730;GO:0005730;GO:0005737;GO:0005737;GO:0005737;GO:0005737;GO:0005737;GO:…	K12799	-	NOG39139	-	PYD and CARD domain containing [Source:MGISymbol;Acc:MGI:1931465]	66824	Q9EPB4;Q54AA2
ENSMUSG00000037868	Egr2	209.866	389.531	30.2004	0.0775302	-3.6891	9.93093e-24	1.1344e-20	10	67535475	67542188	+	3398	GO:0003677;GO:0005634;GO:0046872;GO:0003677;GO:0005634;GO:0046872;GO:0000978;GO:0000978;GO:0000981;GO:0001102;GO:0001228;GO:0001228;GO:0003676;GO:0003676;GO:0003677;GO:0003677;GO:0003682;GO:0003700;GO:0003700;GO:0003700;GO:0005515;GO:0005515;GO:0005634;GO:0005634;GO:0005634;GO:0005654;GO:0005654;GO:0005654;GO:0005737;GO:0006355;GO:0006357;GO:0006366;GO:0006611;GO:0007611;GO:0007622;GO:0008045;GO:…	K12496	-	COG5048	R	early growth response 2 [Source:MGISymbol;Acc:MGI:95296]	13654	P08152;Q3U207
ENSMUSG00000019935	Slc17a8	5.64107	10.2934	0.988712	0.0960527	-3.38003	0.0191314	0.181357	10	89574020	89621253	-	4720	GO:0003407;GO:0005313;GO:0005313;GO:0005326;GO:0005737;GO:0005737;GO:0005771;GO:0005771;GO:0006811;GO:0006814;GO:0006836;GO:0007420;GO:0007605;GO:0015293;GO:0015813;GO:0016020;GO:0016021;GO:0016021;GO:0016021;GO:0016021;GO:0030054;GO:0030285;GO:0030285;GO:0030425;GO:0030425;GO:0030672;GO:0030672;GO:0030672;GO:0031410;GO:0031410;GO:0031410;GO:0035249;GO:0043005;GO:0043025;GO:0043025;GO:0043204;GO:…	K12302	-	COG0477	G	solute carrier family 17 (sodium-dependentinorganic phosphate cotransporter), member 8 [Source:MGISymbol;Acc:MGI:3039629]	216227	Q8BFU8
ENSMUSG00000063704	Mapk15	5.41924	9.84977	0.988712	0.100379	-3.31647	0.0243323	0.211552	15	75993769	75999154	+	2563	GO:0000122;GO:0000165;GO:0000166;GO:0001934;GO:0003400;GO:0003400;GO:0003400;GO:0003682;GO:0003682;GO:0003682;GO:0004672;GO:0004672;GO:0004672;GO:0004672;GO:0004672;GO:0004674;GO:0004707;GO:0004707;GO:0004707;GO:0004707;GO:0004707;GO:0004707;GO:0005515;GO:0005524;GO:0005524;GO:0005524;GO:0005634;GO:0005634;GO:0005634;GO:0005634;GO:0005737;GO:0005737;GO:0005737;GO:0005737;GO:0005776;GO:0005776;GO:…	K19603	EC:2.7.11.24	COG0515	T	mitogen-activated protein kinase 15 [Source:MGISymbol;Acc:MGI:2652894]	332110	Q80Y86
ENSMUSG00000022623	Shank3	5.14516	9.27466	1.01566	0.10951	-3.19087	0.0314676	0.24656	15	89499623	89560261	+	9236	GO:0005515;GO:0000165;GO:0001838;GO:0003779;GO:0005515;GO:0005515;GO:0005515;GO:0005737;GO:0005886;GO:0007416;GO:0007416;GO:0007611;GO:0007612;GO:0007612;GO:0007612;GO:0007613;GO:0007613;GO:0007626;GO:0008022;GO:0008022;GO:0008270;GO:0008270;GO:0008328;GO:0014069;GO:0014069;GO:0014069;GO:0014069;GO:0016020;GO:0017124;GO:0017124;GO:0021773;GO:0030054;GO:0030159;GO:0030160;GO:0030160;GO:0030160;GO:…	K15009	-	COG0666	R	SH3 and multiple ankyrin repeat domains 3[Source:MGI Symbol;Acc:MGI:1930016]	58234	Q4ACU6
ENSMUSG00000072620	Slfn2	4.90455	8.79344	1.01566	0.115502	-3.114	0.0401212	0.285798	11	83065112	83070678	+	1664	GO:0005524;GO:0005524;GO:0008285;GO:0009617;	-	-	NOG254233	-	schlafen 2 [Source:MGI Symbol;Acc:MGI:1313258]"	20556	Q9Z0I6
ENSMUSG00000033717	Adra2a	21.6893	38.7676	4.61091	0.118937	-3.07173	3.16294e-06	0.000225811	19	54044151	54048982	+	4832	GO:0001819;GO:0004930;GO:0004930;GO:0004930;GO:0004935;GO:0004935;GO:0004938;GO:0004938;GO:0004938;GO:0005737;GO:0005886;GO:0005887;GO:0006940;GO:0006940;GO:0007165;GO:0007186;GO:0007186;GO:0007186;GO:0007186;GO:0016020;GO:0016021;GO:0016021;GO:0016021;GO:0019229;GO:0019229;GO:0019901;GO:0030168;GO:0030168;GO:0030335;GO:0031696;GO:0031996;GO:0032147;GO:0032148;GO:0032795;GO:0032870;GO:0035624;GO:…	K04138	-	-	-	adrenergic receptor, alpha 2a [Source:MGISymbol;Acc:MGI:87934]	11551	Q3URE6
ENSMUSG00000021250	Fos	72.1092	127.608	16.6102	0.130166	-2.94158	1.17956e-09	2.4538e-07	12	85473890	85477273	+	2352	GO:0000978;GO:0000978;GO:0000978;GO:0000979;GO:0000979;GO:0001102;GO:0001102;GO:0001228;GO:0001661;GO:0003677;GO:0003677;GO:0003677;GO:0003677;GO:0003677;GO:0003682;GO:0003690;GO:0003690;GO:0003700;GO:0003700;GO:0003700;GO:0003700;GO:0003700;GO:0005515;GO:0005515;GO:0005634;GO:0005634;GO:0005634;GO:0005634;GO:0005634;GO:0005654;GO:0005654;GO:0005667;GO:0005667;GO:0005667;GO:0005737;GO:0005783;GO:…	K04379	-	NOG258795	-	FBJ osteosarcoma oncogene [Source:MGISymbol;Acc:MGI:95574]	14281	P01101
ENSMUSG00000029309	Sparcl1	6.13295	10.7559	1.51002	0.14039	-2.83249	0.0288805	0.233497	5	104079111	104113733	-	2937	GO:0005509;GO:0005509;GO:0005509;GO:0005515;GO:0005518;GO:0005576;GO:0005615;GO:0005615;GO:0005615;GO:0007165;GO:0007165;GO:0045202;GO:0046872;GO:0050807;GO:0050840;GO:0062023;GO:0062023;GO:0098965;GO:0098978;GO:0098978;GO:0099560;	-	-	NOG147672	S	SPARC-like 1 [Source:MGI Symbol;Acc:MGI:108110]"	13602	P70663;Q3TYD5;Q3UYK7
ENSMUSG00000117942	AC115631.1	10.0751	17.6244	2.52568	0.143306	-2.80283	0.00395317	0.0636007	18	36647860	36665917	+	2235	GO:0005737;GO:0045087;	-	-	-	-	novel protein, readthrough Ankhd1-Eif4ebp3"	-	-
ENSMUSG00000033208	S100b	7.63421	13.2371	2.03133	0.153457	-2.70409	0.0163899	0.163613	10	76253853	76261159	+	1484	GO:0001726;GO:0001726;GO:0005102;GO:0005102;GO:0005509;GO:0005509;GO:0005509;GO:0005509;GO:0005509;GO:0005576;GO:0005615;GO:0005615;GO:0005634;GO:0005634;GO:0005634;GO:0005737;GO:0005737;GO:0005737;GO:0005737;GO:0006112;GO:0006874;GO:0007611;GO:0007613;GO:0008270;GO:0008270;GO:0008270;GO:0008270;GO:0008270;GO:0008284;GO:0008284;GO:0008360;GO:0008360;GO:0031643;GO:0031643;GO:0042035;GO:0042802;GO:…	-	-	NOG41158	S	S100 protein, beta polypeptide, neural [Source:MGISymbol;Acc:MGI:98217]	20203	P50114;Q3UY00
ENSMUSG00000057596	Trim30d	45.8475	79.4531	12.2419	0.154077	-2.69828	0.00248547	0.0457396	7	104470014	104507849	-	3758	GO:0003674;GO:0004842;GO:0004842;GO:0005515;GO:0005575;GO:0006914;GO:0006914;GO:0008150;GO:0016567;GO:0045087;GO:0045087;GO:0051607;GO:0051607;GO:0003674;GO:0004842;GO:0004842;GO:0005515;GO:0005575;GO:0006914;GO:0006914;GO:0008150;GO:0008270;GO:0008270;GO:0016567;GO:0045087;GO:0045087;GO:0046872;GO:0046872;GO:0046872;GO:0051607;GO:0051607;GO:0003674;GO:0004842;GO:0004842;GO:0005575;GO:0006914;GO:…	K10648	EC:2.3.2.27	NOG310455	-	tripartite motif-containing 30D [Source:MGISymbol;Acc:MGI:3035181]	209387	Q3TNW3
ENSMUSG00000037206	Islr	11.5657	20.0305	3.10089	0.154808	-2.69145	0.00233323	0.043539	9	58156268	58204306	-	2686	GO:0005515;GO:0005576;GO:0005615;GO:0005515;GO:0005576;GO:0005615;GO:0005515;	-	-	NOG240332	-	immunoglobulin superfamily containing leucine-richrepeat [Source:MGI Symbol;Acc:MGI:1349645]	26968	Q6GU68;A0A146E664
ENSMUSG00000035033	Tbr1	9.34383	16.162	2.52568	0.156273	-2.67786	0.00764447	0.0996335	2	61802930	61814114	+	5486	GO:0000978;GO:0001228;GO:0001661;GO:0003677;GO:0003677;GO:0003700;GO:0003700;GO:0003700;GO:0005634;GO:0005634;GO:0005634;GO:0005634;GO:0005634;GO:0005634;GO:0006355;GO:0006355;GO:0010092;GO:0010468;GO:0010975;GO:0019901;GO:0019901;GO:0021764;GO:0021902;GO:0021987;GO:0030182;GO:0030902;GO:0042802;GO:0042802;GO:0045892;GO:0045944;GO:1902667;GO:0003677;GO:0003700;GO:0003700;GO:0005634;GO:0005634;GO:…	K10174	-	NOG245070	-	T-box brain gene 1 [Source:MGISymbol;Acc:MGI:107404]	21375	Q64336
ENSMUSG00000053560	Ier2	1258.76	2163.35	354.162	0.16371	-2.61079	1.14409e-84	6.09878e-81	8	84661331	84662854	-	1524	GO:0000977;GO:0000977;GO:0001228;GO:0001228;GO:0003677;GO:0003677;GO:0003677;GO:0005634;GO:0005634;GO:0005634;GO:0005654;GO:0005654;GO:0005737;GO:0005737;GO:0005737;GO:0030182;GO:0030182;GO:0045944;GO:0045944;GO:0048870;GO:0048870;GO:0048870;GO:0071774;GO:0071774;	-	-	NOG40154	-	immediate early response 2 [Source:MGISymbol;Acc:MGI:104815]	15936	P17950
ENSMUSG00000049799	Lrrc19	17.4405	29.7489	5.13222	0.172518	-2.53518	0.00280915	0.0497492	4	94636653	94650144	-	2848	GO:0002224;GO:0005515;GO:0005886;GO:0016020;GO:0016021;GO:0032637;GO:0038023;GO:1901224;GO:0002224;GO:0005515;GO:0005886;GO:0016020;GO:0016021;GO:0032637;GO:0038023;GO:1901224;GO:1901224;	-	-	NOG316787	-	leucine rich repeat containing 19 [Source:MGISymbol;Acc:MGI:2140219]	100061	Q8BZT5
ENSMUSG00000040896	Kcnd3	6.90708	11.7559	2.05828	0.175085	-2.51387	0.0314944	0.24665	3	105452330	105674002	+	9587	GO:0005216;GO:0005216;GO:0005216;GO:0005244;GO:0005249;GO:0005249;GO:0005249;GO:0005249;GO:0005250;GO:0005250;GO:0005267;GO:0005267;GO:0005515;GO:0005515;GO:0005886;GO:0005886;GO:0005887;GO:0005901;GO:0006811;GO:0006811;GO:0006811;GO:0006813;GO:0006813;GO:0006813;GO:0008076;GO:0008076;GO:0008076;GO:0008076;GO:0016020;GO:0016020;GO:0016020;GO:0016020;GO:0016021;GO:0016021;GO:0030425;GO:0030425;GO:…	K04893	-	COG1226	P	potassium voltage-gated channel, Shal-relatedfamily, member 3 [Source:MGI Symbol;Acc:MGI:1928743]	56543	Q9Z0V1;B2RUE0
ENSMUSG00000043639	Rbm20	11.9215	20.2747	3.5683	0.175998	-2.50637	0.042978	0.29498	19	53677306	53867080	+	6790	GO:0003676;GO:0003676;GO:0003723;GO:0005634;GO:0005634;GO:0005634;GO:0006397;GO:0007507;GO:0007507;GO:0007507;GO:0007507;GO:0008270;GO:0008270;GO:0008380;GO:0033120;GO:0033120;GO:0033120;GO:0033120;GO:0043484;GO:0043484;GO:0043484;GO:0043484;	-	-	NOG145655	R	RNA binding motif protein 20 [Source:MGISymbol;Acc:MGI:1920963]	73713	Q3UQS8
ENSMUSG00000032401	Lctl	8.40834	14.2371	2.57959	0.181188	-2.46444	0.0177926	0.172762	9	64117147	64138118	+	2604	GO:0002089;GO:0004553;GO:0004553;GO:0005783;GO:0005783;GO:0005783;GO:0005789;GO:0005903;GO:0005975;GO:0005975;GO:0007601;GO:0008422;GO:0016020;GO:0016021;GO:0050896;GO:0004553;GO:0005975;GO:0004553;GO:0004553;GO:0005975;GO:0005975;	-	-	COG2723	G	lactase-like [Source:MGI Symbol;Acc:MGI:2183549]"	235435	Q8K1F9
ENSMUSG00000028195	Ccn1	3557.7	6011.6	1103.8	0.183611	-2.44527	5.57948e-12	1.93972e-09	3	145646976	145649981	-	2019	GO:0001649;GO:0001934;GO:0001934;GO:0002041;GO:0003181;GO:0003278;GO:0003281;GO:0005178;GO:0005178;GO:0005515;GO:0005520;GO:0005520;GO:0005576;GO:0005576;GO:0005576;GO:0005615;GO:0006935;GO:0006935;GO:0007155;GO:0007155;GO:0007155;GO:0008201;GO:0008201;GO:0010518;GO:0010811;GO:0019838;GO:0030198;GO:0030335;GO:0030335;GO:0030501;GO:0030501;GO:0030513;GO:0030513;GO:0031012;GO:0033690;GO:0033690;GO:…	K06829	-	NOG82014	R	cellular communication network factor 1 [Source:MGISymbol;Acc:MGI:88613]	16007	P18406;Q3TX21
ENSMUSG00000071192	Wfikkn1	94.7171	159.845	29.589	0.18511	-2.43354	5.9303e-16	3.16125e-13	17	25877628	25880858	-	2536	GO:0004867;GO:0005515;GO:0005576;GO:0005576;GO:0010466;GO:0030414;GO:0030414;GO:0030512;GO:0048019;GO:0050431;GO:2000272;GO:0001501;GO:0004857;GO:0004867;GO:0004867;GO:0004867;GO:0005515;GO:0005515;GO:0005576;GO:0005576;GO:0005576;GO:0005576;GO:0008191;GO:0010466;GO:0010951;GO:0030414;GO:0030414;GO:0030414;GO:0030512;GO:0030512;GO:0032091;GO:0043392;GO:0045861;GO:0048019;GO:0048019;GO:0048747;GO:…	-	-	NOG240941	-	WAP, FS, Ig, KU, and NTR-containing protein 1[Source:MGI Symbol;Acc:MGI:2670967]	215001	Q8R0S6
ENSMUSG00000050675	Gp1ba	17.5006	29.4554	5.54572	0.188275	-2.40909	0.000591781	0.0159323	11	70639122	70642036	+	2718	GO:0000902;GO:0005515;GO:0005615;GO:0005886;GO:0005886;GO:0005887;GO:0007155;GO:0007155;GO:0007155;GO:0007155;GO:0007596;GO:0007596;GO:0007596;GO:0007596;GO:0007599;GO:0007599;GO:0016020;GO:0016020;GO:0016020;GO:0016021;GO:0031012;GO:0031362;GO:0031362;GO:0031362;GO:0031362;GO:0042730;GO:0042730;GO:0070527;GO:0070527;GO:0000902;GO:0005515;GO:0005615;GO:0005886;GO:0005887;GO:0007155;GO:0007155;GO:…	K06261	-	NOG303231	-	glycoprotein 1b, alpha polypeptide [Source:MGISymbol;Acc:MGI:1333744]	14723	O35930;A2CFB8
ENSMUSG00000061039	Olfr920	13.6095	22.662	4.55701	0.201086	-2.31411	0.0036752	0.0602191	9	38752299	38760117	+	5711	GO:0004930;GO:0004930;GO:0004930;GO:0004984;GO:0004984;GO:0004984;GO:0004984;GO:0005549;GO:0005886;GO:0007165;GO:0007186;GO:0007186;GO:0007186;GO:0007186;GO:0007186;GO:0007608;GO:0007608;GO:0007608;GO:0016020;GO:0016021;GO:0016021;GO:0016021;GO:0016021;GO:0050896;GO:0050911;	K04257	-	-	-	olfactory receptor 920 [Source:MGISymbol;Acc:MGI:3030754]	258783	E9Q413
ENSMUSG00000031397	Tktl1	19.7102	32.8052	6.61529	0.201654	-2.31005	0.000379419	0.0114484	X	74177259	74208500	+	2473	GO:0003824;GO:0003824;GO:0004802;GO:0005575;GO:0005634;GO:0005737;GO:0016740;GO:0046872;	K00615	EC:2.2.1.1	COG0021	G	transketolase-like 1 [Source:MGISymbol;Acc:MGI:1933244]	83553	Q99MX0
ENSMUSG00000047671	Tctex1d4	14.5034	23.9554	5.05137	0.210865	-2.24561	0.00324885	0.0547477	4	117126794	117128738	+	1111	GO:0001669;GO:0005634;GO:0005737;GO:0005815;GO:0005930;GO:0008150;GO:0008157;GO:0008157;GO:0036126;GO:0036126;	-	-	NOG277811	-	Tctex1 domain containing 4 [Source:MGISymbol;Acc:MGI:3045358]	242646	Q8CDY7
ENSMUSG00000038304	Cd160	11.5425	19.0493	4.0357	0.211856	-2.23885	0.00949424	0.114677	3	96798763	96829351	-	2642	GO:0002250;GO:0002376;GO:0002385;GO:0002729;GO:0002729;GO:0002729;GO:0002857;GO:0005102;GO:0005102;GO:0005515;GO:0005576;GO:0005886;GO:0005886;GO:0005886;GO:0014065;GO:0014065;GO:0014065;GO:0016020;GO:0016525;GO:0016525;GO:0019900;GO:0019900;GO:0023024;GO:0031225;GO:0031295;GO:0031295;GO:0031295;GO:0032393;GO:0032393;GO:0032394;GO:0032394;GO:0032397;GO:0032397;GO:0032397;GO:0043323;GO:0045087;GO:…	K06542	-	NOG73979	-	CD160 antigen [Source:MGI Symbol;Acc:MGI:1860383]"	54215	O88875
ENSMUSG00000054083	Capn12	8.41082	13.7747	3.04699	0.221203	-2.17656	0.0342421	0.260268	7	28881422	28893563	+	4770	GO:0004198;GO:0004198;GO:0005509;GO:0005509;GO:0005622;GO:0006508;GO:0006508;GO:0006508;GO:0008233;GO:0008234;GO:0016787;	K04740	EC:3.4.22.-	-	-	calpain 12 [Source:MGI Symbol;Acc:MGI:1891369]"	60594	E9QL26
ENSMUSG00000037211	Spry1	49.8108	81.5282	18.0933	0.221927	-2.17185	0.000814017	0.0202139	3	37639947	37644598	+	2906	GO:0000132;GO:0001656;GO:0001657;GO:0001759;GO:0001759;GO:0001759;GO:0005515;GO:0005654;GO:0005737;GO:0005794;GO:0005829;GO:0005829;GO:0007275;GO:0007275;GO:0007275;GO:0008285;GO:0008285;GO:0008285;GO:0009966;GO:0009966;GO:0016020;GO:0016020;GO:0016020;GO:0034260;GO:0040037;GO:0040037;GO:0043407;GO:0043407;GO:0046580;GO:0046580;GO:0046580;GO:0046580;GO:0051387;GO:0060449;GO:0070373;GO:0070373;GO:…	K04704	-	NOG83905	S	sprouty RTK signaling antagonist 1 [Source:MGISymbol;Acc:MGI:1345139]	24063	Q9QXV9;Q53ZU1
ENSMUSG00000021057	Akap5	38.2736	62.5165	14.0306	0.224431	-2.15566	0.000550237	0.0151976	12	76324891	76334153	+	6824	GO:0005623;GO:0006605;GO:0006605;GO:0007165;GO:0007165;GO:0001664;GO:0001934;GO:0003779;GO:0005515;GO:0005515;GO:0005516;GO:0005737;GO:0005856;GO:0005886;GO:0005886;GO:0005886;GO:0005886;GO:0006605;GO:0006605;GO:0007165;GO:0007165;GO:0007193;GO:0007194;GO:0007194;GO:0008179;GO:0008179;GO:0009898;GO:0010524;GO:0010738;GO:0014069;GO:0014069;GO:0016020;GO:0016323;GO:0017124;GO:0019900;GO:0019901;GO:…	K16522	-	-	-	A kinase (PRKA) anchor protein 5 [Source:MGISymbol;Acc:MGI:2685104]	238276	D3YVF0
ENSMUSG00000048478	Spata33	299.797	489.489	110.105	0.224939	-2.15239	2.43936e-05	0.00125435	8	123212832	123222046	+	4303	GO:0003674;GO:0005634;GO:0005634;GO:0005634;GO:0005737;GO:0005737;GO:0005737;GO:0005829;GO:0008150;	-	-	NOG39640	U	spermatogenesis associated 33 [Source:MGISymbol;Acc:MGI:2444920]	320869	Q8C624
ENSMUSG00000047415	Gpr68	69.4032	113.028	25.7781	0.228068	-2.13246	5.21746e-10	1.19197e-07	12	100876682	100908198	-	7159	GO:0004930;GO:0004930;GO:0004930;GO:0005886;GO:0007165;GO:0007186;GO:0007186;GO:0007186;GO:0016020;GO:0016021;GO:0016021;GO:0016021;GO:0032024;GO:0035774;GO:0045656;GO:0071467;GO:0071467;GO:2001206;GO:0004930;GO:0004930;GO:0004930;GO:0005886;GO:0007165;GO:0007186;GO:0007186;GO:0007186;GO:0016020;GO:0016021;GO:0016021;GO:0016021;GO:0032024;GO:0035774;GO:0045656;GO:0071467;GO:0071467;GO:2001206;GO:…	K08408	-	NOG149070	S	G protein-coupled receptor 68 [Source:MGISymbol;Acc:MGI:2441763]	238377	Q8BFQ3
ENSMUSG00000029378	Areg	17.4063	28.3052	6.50748	0.229904	-2.1209	0.00471924	0.0712567	5	91139599	91148432	+	1215	GO:0005125;GO:0005154;GO:0005154;GO:0005154;GO:0005615;GO:0005615;GO:0005615;GO:0005615;GO:0005615;GO:0005634;GO:0005737;GO:0007173;GO:0007173;GO:0007173;GO:0007173;GO:0007186;GO:0007186;GO:0008083;GO:0008083;GO:0008083;GO:0008083;GO:0008284;GO:0008284;GO:0008284;GO:0008284;GO:0009986;GO:0009986;GO:0014009;GO:0014009;GO:0014070;GO:0016020;GO:0016021;GO:0031175;GO:0031175;GO:0032355;GO:0042327;GO:…	K09782	-	NOG41450	-	amphiregulin [Source:MGI Symbol;Acc:MGI:88068]"	11839	P31955;Q4FJT2
ENSMUSG00000056656	Apol8	77.0062	124.909	29.1039	0.233001	-2.10159	1.21146e-10	3.17602e-08	15	77747798	77757003	-	2962	GO:0005576;GO:0005576;GO:0006869;GO:0006869;GO:0008150;GO:0008289;GO:0008289;GO:0008289;GO:0016020;GO:0016021;GO:0042157;GO:0042157;GO:0005576;GO:0005576;GO:0006869;GO:0006869;GO:0008150;GO:0008289;GO:0008289;GO:0008289;GO:0016020;GO:0016021;GO:0042157;GO:0042157;GO:0005576;GO:0005576;GO:0006869;GO:0006869;GO:0008150;GO:0008289;GO:0008289;GO:0008289;GO:0042157;GO:0042157;GO:0008150;GO:0008289;	K14480	-	NOG125779	U	apolipoprotein L 8 [Source:MGISymbol;Acc:MGI:2444921]	239552	A2VDH7
ENSMUSG00000045007	Tubg2	19.6319	31.7676	7.49619	0.23597	-2.08333	0.0012738	0.0280202	11	101155907	101161787	+	1754	GO:0000070;GO:0000166;GO:0000212;GO:0000226;GO:0000242;GO:0000278;GO:0000930;GO:0000930;GO:0000930;GO:0003924;GO:0003924;GO:0003924;GO:0005200;GO:0005525;GO:0005525;GO:0005525;GO:0005525;GO:0005634;GO:0005737;GO:0005737;GO:0005813;GO:0005813;GO:0005815;GO:0005819;GO:0005856;GO:0005874;GO:0005874;GO:0005874;GO:0005874;GO:0005874;GO:0005874;GO:0005876;GO:0005881;GO:0007017;GO:0007017;GO:0007017;GO:…	K10389	-	COG5023	Z	tubulin, gamma 2 [Source:MGISymbol;Acc:MGI:2144208]	103768	Q8VCK3;Q6F4J0
ENSMUSG00000040253	Gbp7	38.2347	61.6479	14.8214	0.240421	-2.05637	5.76397e-06	0.000376234	3	142530342	142550149	+	5614	GO:0000166;GO:0003924;GO:0003924;GO:0003924;GO:0005525;GO:0005525;GO:0005525;GO:0005525;GO:0020005;GO:0020005;GO:0031410;GO:0031410;GO:0042832;GO:0042832;GO:0044406;GO:0050830;GO:0050830;GO:0071346;GO:0071346;GO:0000166;GO:0003924;GO:0003924;GO:0003924;GO:0005525;GO:0005525;GO:0005525;GO:0005525;GO:0020005;GO:0020005;GO:0031410;GO:0031410;GO:0042832;GO:0042832;GO:0044406;GO:0050830;GO:0050830;GO:…	K20899	-	-	-	guanylate binding protein 7 [Source:MGISymbol;Acc:MGI:2444421]	229900	Q91Z40
ENSMUSG00000041423	Paqr6	9.17148	14.7747	3.5683	0.241515	-2.04982	0.0345848	0.26138	3	88364584	88368541	+	2429	GO:0016020;GO:0016021;GO:0016021;GO:0016021;GO:0005496;GO:0005886;GO:0008289;GO:0016020;GO:0016021;GO:0016021;GO:0016021;GO:0038023;	-	-	COG1272	R	progestin and adipoQ receptor family member VI[Source:MGI Symbol;Acc:MGI:1916207]	68957	Q6TCG5;Q0VBT6
ENSMUSG00000055978	Fut2	18.4881	29.3991	7.57705	0.257731	-1.95606	0.00301284	0.0520879	7	45648591	45666394	-	5431	GO:0005794;GO:0005975;GO:0005975;GO:0006486;GO:0006486;GO:0006486;GO:0008107;GO:0008107;GO:0008107;GO:0008107;GO:0008107;GO:0008417;GO:0016020;GO:0016020;GO:0016020;GO:0016021;GO:0016740;GO:0016757;GO:0032580;GO:0036065;GO:0036065;GO:0005794;GO:0005975;GO:0005975;GO:0006486;GO:0008107;GO:0008107;GO:0016020;GO:0016020;GO:0016020;GO:0016021;GO:0016740;GO:0016757;GO:0032580;GO:0036065;	K00718	EC:2.4.1.69	NOG17447	U	fucosyltransferase 2 [Source:MGISymbol;Acc:MGI:109374]	14344	Q9JL27;A6H6C9
ENSMUSG00000039942	Ptger4	371.643	588.069	155.217	0.263944	-1.9217	2.25637e-18	1.44335e-15	15	5206661	5244187	-	6648	GO:0004930;GO:0004930;GO:0004930;GO:0004955;GO:0004955;GO:0004957;GO:0004957;GO:0007165;GO:0007186;GO:0007186;GO:0007186;GO:0016020;GO:0016021;GO:0016021;GO:0016021;GO:0001934;GO:0002792;GO:0004930;GO:0004930;GO:0004930;GO:0004955;GO:0004955;GO:0004957;GO:0004957;GO:0004957;GO:0004957;GO:0004957;GO:0004957;GO:0005886;GO:0005886;GO:0005886;GO:0006954;GO:0006955;GO:0007165;GO:0007186;GO:0007186;GO:…	K04261	-	NOG295140	-	prostaglandin E receptor 4 (subtype EP4)[Source:MGI Symbol;Acc:MGI:104311]	19219	P32240
ENSMUSG00000043782	Bicdl2	44.369	70.2043	18.5337	0.263997	-1.92141	5.73173e-06	0.000375663	17	23660506	23668621	+	2773	GO:0005623;GO:0005737;GO:0017137;GO:0017137;GO:0047496;GO:0055107;GO:0005623;GO:0005737;GO:0017137;GO:0017137;GO:0047496;GO:0055107;	K16756	-	NOG119169	S	BICD family like cargo adaptor 2 [Source:MGISymbol;Acc:MGI:2388267]	212733	Q8CHW5
ENSMUSG00000022893	Adamts1	1389.9	2197.64	582.155	0.2649	-1.91648	0.000537205	0.0149831	16	85793827	85803113	-	5302	GO:0001542;GO:0001822;GO:0004222;GO:0004222;GO:0004222;GO:0005515;GO:0005576;GO:0005604;GO:0006508;GO:0006508;GO:0006508;GO:0008201;GO:0008201;GO:0008233;GO:0008237;GO:0008237;GO:0008237;GO:0008270;GO:0008270;GO:0010976;GO:0016525;GO:0016787;GO:0031012;GO:0031012;GO:0031012;GO:0031410;GO:0046872;GO:0060347;GO:0062023;GO:1900087;GO:1900087;GO:1904707;GO:1904707;GO:1904754;GO:1904754;GO:0004222;GO:…	K08617	EC:3.4.24.-	NOG291688	-	a disintegrin-like and metallopeptidase (reprolysintype) with thrombospondin type 1 motif, 1 [Source:MGISymbol;Acc:MGI:109249]	11504	P97857;Q3TQF7;Q3TTE6
ENSMUSG00000029859	Epha1	10.8595	17.162	4.55701	0.265529	-1.91306	0.0289958	0.233864	6	42358487	42373268	-	3928	GO:0000166;GO:0001525;GO:0001954;GO:0001954;GO:0001954;GO:0004672;GO:0004672;GO:0004672;GO:0004672;GO:0004672;GO:0004713;GO:0004713;GO:0004713;GO:0004714;GO:0004714;GO:0005003;GO:0005003;GO:0005005;GO:0005005;GO:0005005;GO:0005005;GO:0005515;GO:0005524;GO:0005524;GO:0005524;GO:0005886;GO:0005887;GO:0005887;GO:0005887;GO:0005887;GO:0005887;GO:0005887;GO:0006468;GO:0006468;GO:0006469;GO:0006469;GO:…	K05102	EC:2.7.10.1	COG0515	T	Eph receptor A1 [Source:MGI Symbol;Acc:MGI:107381]"	13835	Q60750
ENSMUSG00000023034	Nr4a1	491.044	775.017	207.071	0.267182	-1.90411	1.50349e-05	0.0008291	15	101254269	101274795	+	3509	GO:0000977;GO:0000978;GO:0001228;GO:0001228;GO:0001938;GO:0002042;GO:0003677;GO:0003677;GO:0003677;GO:0003677;GO:0003700;GO:0003700;GO:0003707;GO:0003707;GO:0004879;GO:0004879;GO:0005515;GO:0005515;GO:0005634;GO:0005634;GO:0005634;GO:0005634;GO:0005634;GO:0005634;GO:0005634;GO:0005634;GO:0005667;GO:0005667;GO:0005737;GO:0005829;GO:0005829;GO:0006355;GO:0006355;GO:0006915;GO:0008134;GO:0008134;GO:…	K04465	-	NOG245120	-	nuclear receptor subfamily 4, group A, member 1[Source:MGI Symbol;Acc:MGI:1352454]	15370	P12813;Q545Q1
ENSMUSG00000049758	Olfr1318	12.1794	19.1995	5.15917	0.268713	-1.89586	0.019944	0.185757	2	112154198	112159157	+	4520	GO:0004930;GO:0004930;GO:0004930;GO:0004984;GO:0004984;GO:0004984;GO:0005886;GO:0007165;GO:0007186;GO:0007186;GO:0007186;GO:0007186;GO:0007186;GO:0007608;GO:0007608;GO:0016020;GO:0016021;GO:0016021;GO:0016021;GO:0016021;GO:0050896;GO:0050911;GO:0004930;GO:0004930;GO:0004930;GO:0004984;GO:0004984;GO:0004984;GO:0005886;GO:0007165;GO:0007186;GO:0007186;GO:0007186;GO:0007186;GO:0007186;GO:0007608;GO:…	K04257	-	NOG147013	O	olfactory receptor 1318 [Source:MGISymbol;Acc:MGI:3031152]	258022	Q7TQW6
ENSMUSG00000057132	Rpgrip1	29.9603	47.2113	12.7093	0.2692	-1.89325	0.000211998	0.00729091	14	52110704	52163546	+	12152	GO:0005929;GO:0005929;GO:0005930;GO:0007601;GO:0007601;GO:0007601;GO:0007601;GO:0032391;GO:0032391;GO:0032391;GO:0035253;GO:0035869;GO:0042462;GO:0042462;GO:0042462;GO:0042995;GO:0050896;GO:0060041;GO:0061351;GO:0097730;GO:0007601;GO:0032391;GO:0042462;GO:0007601;GO:0007601;GO:0032391;GO:0032391;GO:0042462;GO:0042462;GO:0007601;GO:0007601;GO:0032391;GO:0032391;GO:0042462;GO:0042462;GO:0007601;GO:…	K16512	-	NOG117461	S	retinitis pigmentosa GTPase regulator interactingprotein 1 [Source:MGI Symbol;Acc:MGI:1932134]	77945	Q9EPQ2;Q0VGR8
ENSMUSG00000021798	Ldb3	10.6511	16.7183	4.58396	0.274188	-1.86676	0.0343514	0.260666	14	34526603	34588682	-	6105	GO:0001725;GO:0003779;GO:0005080;GO:0005515;GO:0005515;GO:0005515;GO:0005737;GO:0005856;GO:0005856;GO:0005856;GO:0005913;GO:0007507;GO:0008092;GO:0008092;GO:0030018;GO:0030018;GO:0030018;GO:0030018;GO:0030018;GO:0030036;GO:0031143;GO:0031941;GO:0042995;GO:0045214;GO:0046872;GO:0048471;GO:0051371;GO:0051371;GO:0061061;GO:0001725;GO:0003779;GO:0005080;GO:0005515;GO:0005515;GO:0005515;GO:0005737;GO:…	K19867	-	NOG286537	-	LIM domain binding 3 [Source:MGISymbol;Acc:MGI:1344412]	24131	Q9JKS4
ENSMUSG00000020423	Btg2	414.454	650.179	178.73	0.274893	-1.86306	1.9087e-18	1.27183e-15	1	134075170	134079120	-	2743	GO:0000122;GO:0000122;GO:0001227;GO:0001227;GO:0005515;GO:0005634;GO:0005737;GO:0006479;GO:0006974;GO:0006974;GO:0008285;GO:0008285;GO:0008285;GO:0008285;GO:0008285;GO:0008285;GO:0008306;GO:0009612;GO:0009952;GO:0010033;GO:0010243;GO:0014070;GO:0017148;GO:0017148;GO:0017148;GO:0021542;GO:0021954;GO:0030182;GO:0030182;GO:0031175;GO:0031175;GO:0035914;GO:0043066;GO:0043066;GO:0043434;GO:0043524;GO:…	K14443	-	NOG287298	-	B cell translocation gene 2, anti-proliferative[Source:MGI Symbol;Acc:MGI:108384]	12227	Q04211;Q3TF68
ENSMUSG00000048191	Muc6	49.8501	77.9038	21.7963	0.279785	-1.83761	3.14189e-06	0.000225314	7	141633456	141655319	-	9361	GO:0005515;GO:0030277;GO:0030277;GO:0005515;GO:0030277;GO:0030277;GO:0005515;GO:0030277;GO:0030277;	K22023	-	-	-	mucin 6, gastric [Source:MGISymbol;Acc:MGI:2663233]	353328	Q0VAV1
ENSMUSG00000079363	Gbp4	60.5181	94.5212	26.5151	0.28052	-1.83383	0.0268097	0.224245	5	105115767	105139586	-	7494	GO:0000122;GO:0000166;GO:0001933;GO:0003924;GO:0005515;GO:0005525;GO:0005525;GO:0016020;GO:0031397;GO:0032687;GO:0042308;GO:0050688;GO:0071346;GO:0000122;GO:0000166;GO:0001933;GO:0003924;GO:0003924;GO:0005515;GO:0005525;GO:0005525;GO:0005525;GO:0031397;GO:0032687;GO:0042308;GO:0050688;GO:0071346;GO:0000122;GO:0000166;GO:0001933;GO:0003924;GO:0003924;GO:0005515;GO:0005525;GO:0005525;GO:0005525;GO:…	K20908	-	NOG288755	-	guanylate binding protein 4 [Source:MGISymbol;Acc:MGI:97072]	17472	A4UUI3
ENSMUSG00000052837	Junb	1941.99	3028.73	855.252	0.28238	-1.82429	1.70399e-10	4.25785e-08	8	84974484	84978718	-	2301	GO:0000122;GO:0000790;GO:0000977;GO:0000978;GO:0000978;GO:0000981;GO:0001228;GO:0001570;GO:0001649;GO:0001701;GO:0001829;GO:0003677;GO:0003677;GO:0003677;GO:0003677;GO:0003690;GO:0003700;GO:0003700;GO:0003700;GO:0003713;GO:0005515;GO:0005515;GO:0005515;GO:0005515;GO:0005634;GO:0005634;GO:0005654;GO:0005654;GO:0005654;GO:0005667;GO:0006355;GO:0006355;GO:0006355;GO:0006357;GO:0006357;GO:0006366;GO:…	K09028	-	NOG283376	-	jun B proto-oncogene [Source:MGISymbol;Acc:MGI:96647]	16477	P09450;Q569U6
ENSMUSG00000023393	Slc17a9	35.5929	55.4296	15.7563	0.284257	-1.81473	9.60447e-05	0.00388847	2	180725263	180742280	+	3200	GO:0005215;GO:0006887;GO:0016020;GO:0016021;GO:0016021;GO:0016021;GO:0016021;GO:0055085;GO:0055085;	K12303	-	COG0477	G	solute carrier family 17, member 9 [Source:MGISymbol;Acc:MGI:1919107]	228993	Q8VCL5;Q9DA66
ENSMUSG00000090264	Eif4ebp3	25.4769	39.6737	11.2801	0.284322	-1.8144	0.000925185	0.0221822	18	36664060	36665917	+	744	GO:0005737;GO:0006417;GO:0008190;GO:0008190;GO:0008190;GO:0017148;GO:0045947;GO:0045947;GO:0045947;	K18645	-	COG0666	R	eukaryotic translation initiation factor 4E bindingprotein 3 [Source:MGI Symbol;Acc:MGI:1270847]	108112	Q80VV3
ENSMUSG00000021822	Plau	233.784	363.906	103.661	0.284856	-1.8117	1.07991e-07	1.2888e-05	14	20836660	20843385	+	2367	GO:0001525;GO:0001666;GO:0004252;GO:0004252;GO:0004252;GO:0005515;GO:0005515;GO:0005576;GO:0005615;GO:0005615;GO:0005615;GO:0006508;GO:0006508;GO:0006508;GO:0006508;GO:0008233;GO:0008233;GO:0008236;GO:0008236;GO:0008236;GO:0008284;GO:0009986;GO:0009986;GO:0010469;GO:0010469;GO:0014909;GO:0014910;GO:0014910;GO:0014911;GO:0016020;GO:0016301;GO:0016310;GO:0016787;GO:0030335;GO:0030335;GO:0031639;GO:…	K01348	EC:3.4.21.73	COG5640	O	plasminogen activator, urokinase [Source:MGISymbol;Acc:MGI:97611]	18792	P06869;Q0VBA8
ENSMUSG00000019997	Ccn2	1749.32	2719.79	778.857	0.286366	-1.80407	0.000678335	0.0176594	10	24595442	24598683	+	2861	GO:0001502;GO:0001503;GO:0001525;GO:0001894;GO:0001934;GO:0001934;GO:0001968;GO:0001968;GO:0005178;GO:0005178;GO:0005515;GO:0005520;GO:0005520;GO:0005576;GO:0005576;GO:0005576;GO:0005576;GO:0005615;GO:0005615;GO:0005615;GO:0005801;GO:0005801;GO:0005829;GO:0005829;GO:0005938;GO:0005938;GO:0007155;GO:0007155;GO:0007160;GO:0007229;GO:0007568;GO:0008022;GO:0008022;GO:0008083;GO:0008083;GO:0008201;GO:…	K06827	-	NOG72934	S	cellular communication network factor 2 [Source:MGISymbol;Acc:MGI:95537]	14219	P29268
ENSMUSG00000017144	Rnd3	790.572	1227.09	354.053	0.288531	-1.7932	4.98921e-10	1.15634e-07	2	51130438	51149111	-	4432	GO:0000139;GO:0000166;GO:0003924;GO:0003924;GO:0003924;GO:0005515;GO:0005525;GO:0005525;GO:0005525;GO:0005525;GO:0005622;GO:0005737;GO:0005794;GO:0005886;GO:0005938;GO:0007015;GO:0007264;GO:0007264;GO:0007266;GO:0008360;GO:0016020;GO:0019901;GO:0030334;GO:0030950;GO:0032153;GO:0032956;GO:0043231;GO:0051017;GO:0000166;GO:0003924;GO:0003924;GO:0005525;GO:0005525;GO:0005525;GO:0005622;GO:0007264;GO:…	K07859	-	COG1100	R	Rho family GTPase 3 [Source:MGISymbol;Acc:MGI:1921444]	74194	P61588
ENSMUSG00000079677	Fdx1l	11.4012	17.6432	5.15917	0.292417	-1.7739	0.0337632	0.258965	9	21067520	21073614	-	1423	GO:0005739;GO:0005739;GO:0005759;GO:0008150;GO:0009055;GO:0009055;GO:0022900;GO:0046872;GO:0051536;GO:0051536;GO:0051536;GO:0051537;GO:0051537;GO:0051537;GO:0055114;	K22071	-	COG0633	C	ferredoxin 1-like [Source:MGISymbol;Acc:MGI:1915415]	68165	Q9CPW2
ENSMUSG00000019960	Dusp6	924.14	1425.76	422.517	0.296345	-1.75465	1.48017e-17	8.767e-15	10	99263231	99267489	+	3132	GO:0000188;GO:0000188;GO:0001933;GO:0004721;GO:0004721;GO:0004725;GO:0005515;GO:0005515;GO:0005737;GO:0005737;GO:0005737;GO:0005737;GO:0005737;GO:0005829;GO:0005829;GO:0005829;GO:0006470;GO:0006470;GO:0006470;GO:0006470;GO:0008138;GO:0008138;GO:0008138;GO:0008138;GO:0008138;GO:0010033;GO:0010942;GO:0010942;GO:0014070;GO:0016311;GO:0016311;GO:0016787;GO:0016791;GO:0016791;GO:0017017;GO:0017017;GO:…	K21946	-	COG2453	T	dual specificity phosphatase 6 [Source:MGISymbol;Acc:MGI:1914853]	67603	Q9DBB1
ENSMUSG00000004902	Slc25a18	17.883	27.5869	8.17921	0.296489	-1.75395	0.00799993	0.102594	6	120773578	120794336	+	1911	GO:0005313;GO:0005739;GO:0005743;GO:0005743;GO:0015183;GO:0015293;GO:0015810;GO:0015813;GO:0016020;GO:0016021;GO:0022857;GO:0022857;GO:0043490;GO:0055085;GO:0055085;GO:0070778;	K15107	-	NOG276269	-	solute carrier family 25 (mitochondrial carrier),member 18 [Source:MGI Symbol;Acc:MGI:1919053]	71803	Q9DB41
ENSMUSG00000020893	Per1	894.993	1377.37	412.611	0.299564	-1.73907	1.82743e-19	1.39164e-16	11	69095217	69109960	+	5631	GO:0005515;GO:0000122;GO:0000122;GO:0000122;GO:0000122;GO:0000976;GO:0000976;GO:0000978;GO:0000978;GO:0001222;GO:0002028;GO:0005515;GO:0005515;GO:0005515;GO:0005515;GO:0005634;GO:0005634;GO:0005634;GO:0005654;GO:0005654;GO:0005654;GO:0005737;GO:0005737;GO:0005737;GO:0005737;GO:0005829;GO:0005829;GO:0005829;GO:0007623;GO:0007623;GO:0007623;GO:0007623;GO:0008134;GO:0008134;GO:0009416;GO:0009416;GO:…	K21944	-	NOG253593	-	period circadian clock 1 [Source:MGISymbol;Acc:MGI:1098283]	18626	O35973
ENSMUSG00000073758	Sh3d21	77.86	119.758	35.9617	0.300286	-1.73559	2.22262e-05	0.00115403	4	126150602	126163491	-	2717	GO:0003674;GO:0005515;GO:0005634;GO:0005654;GO:0005886;GO:0008150;GO:0005515;	-	-	NOG320053	-	SH3 domain containing 21 [Source:MGISymbol;Acc:MGI:1914188]	66938	Q7TSG5;Q9D9T7;Q9CT24
ENSMUSG00000028270	Gbp2	411.457	631.529	191.384	0.303049	-1.72237	4.05982e-06	0.000276275	3	142620602	142638008	+	2516	GO:0000139;GO:0000166;GO:0003924;GO:0003924;GO:0003924;GO:0003924;GO:0005525;GO:0005525;GO:0005525;GO:0005525;GO:0005634;GO:0005654;GO:0005737;GO:0005737;GO:0005794;GO:0005794;GO:0005829;GO:0009617;GO:0015629;GO:0016020;GO:0016787;GO:0020005;GO:0020005;GO:0031410;GO:0031410;GO:0034504;GO:0035458;GO:0042803;GO:0042832;GO:0042832;GO:0044406;GO:0048471;GO:0048471;GO:0050830;GO:0050830;GO:0071222;GO:…	K20897	-	NOG288755	-	guanylate binding protein 2 [Source:MGISymbol;Acc:MGI:102772]	14469	Q9Z0E6
ENSMUSG00000020205	Phlda1	177.929	273.085	82.7723	0.303101	-1.72213	5.1104e-09	9.08062e-07	10	111506286	111508645	+	2205	GO:0005515;GO:0005634;GO:0005634;GO:0005634;GO:0005730;GO:0005730;GO:0005730;GO:0005737;GO:0006915;GO:0031410;GO:0043065;GO:0045210;	-	-	NOG40772	-	pleckstrin homology like domain, family A, member 1[Source:MGI Symbol;Acc:MGI:1096880]	21664	Q62392
ENSMUSG00000075297	H60b	12.8041	19.5681	6.04008	0.30867	-1.69586	0.0325696	0.252016	10	22158586	22288849	+	1213	GO:0001913;GO:0002376;GO:0005615;GO:0005886;GO:0005886;GO:0006955;GO:0009897;GO:0016020;GO:0016021;GO:0016021;GO:0030101;GO:0042267;GO:0042267;GO:0042271;GO:0046703;GO:0046703;GO:0001913;GO:0002376;GO:0005615;GO:0005886;GO:0005886;GO:0006955;GO:0009897;GO:0016020;GO:0016021;GO:0016021;GO:0030101;GO:0042267;GO:0042267;GO:0042271;GO:0046703;GO:0046703;	-	-	-	-	histocompatibility 60b [Source:MGISymbol;Acc:MGI:3649078]	667281	B1B212
ENSMUSG00000022894	Adamts5	1661.62	2534.29	788.946	0.311308	-1.68358	0.0252547	0.216206	16	85856173	85901828	-	10791	GO:0004222;GO:0004222;GO:0005576;GO:0005615;GO:0005615;GO:0006508;GO:0006508;GO:0006508;GO:0008201;GO:0008233;GO:0008237;GO:0008237;GO:0008237;GO:0008237;GO:0008270;GO:0008270;GO:0016787;GO:0042742;GO:0044691;GO:0046872;GO:0050840;GO:0062023;GO:0062023;GO:0120163;	K08620	EC:3.4.24.-	NOG302522	-	a disintegrin-like and metallopeptidase (reprolysintype) with thrombospondin type 1 motif, 5 (aggrecanase-2)[Source:MGI Symbol;Acc:MGI:1346321]	23794	Q9R001;Q8BGP4
ENSMUSG00000072772	Grcc10	72.7886	110.991	34.5865	0.311616	-1.68216	2.23195e-07	2.46161e-05	6	124739183	124741374	-	1988	GO:0003674;GO:0005737;GO:0005737;GO:0005737;GO:0009791;GO:0009791;GO:0014819;GO:0014819;GO:0016607;GO:0016607;GO:0021540;GO:0021540;GO:0021678;GO:0021678;GO:0036343;GO:0036343;GO:0048593;GO:0048593;GO:0050890;GO:0050890;	-	-	NOG87122	S	gene rich cluster, C10 gene [Source:MGISymbol;Acc:MGI:1315201]	14790	O35127
ENSMUSG00000048827	Pkd1l3	47.3459	72.1855	22.5063	0.311784	-1.68138	2.4992e-05	0.00126079	8	109614517	109674386	+	7061	GO:0001581;GO:0005261;GO:0005262;GO:0005509;GO:0005509;GO:0005515;GO:0005515;GO:0005515;GO:0005886;GO:0005886;GO:0006811;GO:0006812;GO:0006816;GO:0008324;GO:0009986;GO:0016020;GO:0016020;GO:0016020;GO:0016020;GO:0016021;GO:0030246;GO:0033040;GO:0034220;GO:0034703;GO:0043235;GO:0050915;GO:0050982;GO:0070588;GO:0071468;GO:0098655;GO:0001581;GO:0005261;GO:0005262;GO:0005509;GO:0005509;GO:0005515;GO:…	K04989	-	NOG12793	-	polycystic kidney disease 1 like 3 [Source:MGISymbol;Acc:MGI:2664670]	230868	Q2EG98
ENSMUSG00000048794	Cfap100	48.8269	74.3475	23.3064	0.313479	-1.67356	2.16974e-05	0.00113766	6	90403479	90428797	-	4122	GO:0003341;GO:0003674;GO:0005575;GO:0005737;GO:0005856;GO:0005929;GO:0008150;GO:0031514;GO:0036159;GO:0042995;GO:0070840;GO:0097545;GO:2000574;	-	-	NOG45507	-	cilia and flagella associated protein 100[Source:MGI Symbol;Acc:MGI:2141635]	243538	Q80VN0
ENSMUSG00000029019	Nppb	23.4687	35.7113	11.2262	0.31436	-1.66951	0.00328957	0.0552593	4	147985788	147987205	+	781	GO:0003085;GO:0003085;GO:0005179;GO:0005179;GO:0005179;GO:0005179;GO:0005179;GO:0005576;GO:0005576;GO:0005576;GO:0005615;GO:0005615;GO:0005634;GO:0005634;GO:0005737;GO:0005737;GO:0006182;GO:0007165;GO:0007168;GO:0007168;GO:0007218;GO:0010753;GO:0014898;GO:0019934;GO:0030308;GO:0032991;GO:0035810;GO:0035815;GO:0048471;GO:0048662;GO:0050880;GO:0051427;GO:1903816;	K12335	-	NOG67899	-	natriuretic peptide type B [Source:MGISymbol;Acc:MGI:97368]	18158	P40753;Q54AE9
ENSMUSG00000055148	Klf2	111.004	168.808	53.201	0.315158	-1.66585	4.06317e-10	9.69824e-08	8	72319033	72321656	+	1847	GO:0000122;GO:0000122;GO:0000790;GO:0000790;GO:0000902;GO:0000981;GO:0000981;GO:0000981;GO:0001701;GO:0003676;GO:0003676;GO:0003677;GO:0003677;GO:0003677;GO:0003700;GO:0003700;GO:0003700;GO:0003700;GO:0005515;GO:0005634;GO:0005634;GO:0005634;GO:0006357;GO:0032715;GO:0032715;GO:0034101;GO:0034616;GO:0035264;GO:0036003;GO:0036003;GO:0040029;GO:0043249;GO:0045429;GO:0045429;GO:0045893;GO:0045893;GO:…	K17845	-	COG5048	R	Kruppel-like factor 2 (lung) [Source:MGISymbol;Acc:MGI:1342772]	16598	Q60843;Q3V293
ENSMUSG00000027962	Vcam1	3025.96	4600.33	1451.59	0.31554	-1.6641	0.000149694	0.00564343	3	116109949	116129688	-	8870	GO:0001666;GO:0002102;GO:0002526;GO:0002544;GO:0005178;GO:0005178;GO:0005615;GO:0005615;GO:0005769;GO:0005783;GO:0005794;GO:0005902;GO:0007155;GO:0007155;GO:0007155;GO:0007155;GO:0007157;GO:0007159;GO:0007160;GO:0007568;GO:0007584;GO:0008131;GO:0009308;GO:0009897;GO:0009986;GO:0009986;GO:0010043;GO:0010212;GO:0016020;GO:0016020;GO:0016020;GO:0016021;GO:0016021;GO:0016021;GO:0022614;GO:0030175;GO:…	K06527	-	-	-	vascular cell adhesion molecule 1 [Source:MGISymbol;Acc:MGI:98926]	22329	Q3UPN1
ENSMUSG00000044433	Camsap3	19.0094	28.824	9.19487	0.319001	-1.64837	0.00913051	0.112147	8	3587293	3609075	+	6119	GO:0000226;GO:0000226;GO:0000226;GO:0005515;GO:0005515;GO:0005515;GO:0005515;GO:0005516;GO:0005516;GO:0005737;GO:0005737;GO:0005813;GO:0005856;GO:0005874;GO:0005912;GO:0005915;GO:0005915;GO:0007026;GO:0008017;GO:0008017;GO:0009792;GO:0010923;GO:0010923;GO:0030054;GO:0030334;GO:0030334;GO:0030507;GO:0030507;GO:0030951;GO:0030951;GO:0031113;GO:0031113;GO:0031122;GO:0031175;GO:0031175;GO:0033043;GO:…	K17493	-	NOG306660	-	calmodulin regulated spectrin-associated proteinfamily, member 3 [Source:MGI Symbol;Acc:MGI:1916947]	69697	Q80VC9
ENSMUSG00000025584	Pde8a	17.8978	27.0681	8.72747	0.322426	-1.63296	0.0125692	0.138625	7	81213596	81334533	+	4045	GO:0001934;GO:0001934;GO:0004114;GO:0004114;GO:0004115;GO:0004115;GO:0004115;GO:0006198;GO:0007165;GO:0007165;GO:0008081;GO:0008081;GO:0016787;GO:0019900;GO:0019900;GO:0046872;GO:0047555;GO:0047555;GO:0060548;GO:0060548;GO:0070374;GO:0070374;GO:0070374;GO:0070374;GO:0071364;GO:0071364;GO:0071364;GO:0071364;GO:1903206;GO:1903206;	K18437	EC:3.1.4.53	NOG282089	-	phosphodiesterase 8A [Source:MGISymbol;Acc:MGI:1277116]	18584	O88502
ENSMUSG00000032988	Slc16a8	37.7324	56.9672	18.4976	0.324705	-1.6228	0.000255225	0.00834709	15	79251014	79254761	-	2276	GO:0005886;GO:0005887;GO:0005887;GO:0005887;GO:0008028;GO:0008028;GO:0008028;GO:0009925;GO:0015129;GO:0015129;GO:0015293;GO:0015718;GO:0015718;GO:0015718;GO:0016020;GO:0016021;GO:0016021;GO:0016021;GO:0035873;GO:0055085;GO:0055085;	K08185	-	NOG297999	-	solute carrier family 16 (monocarboxylic acidtransporters), member 8 [Source:MGISymbol;Acc:MGI:1929519]	57274	O35308;Q5UB50
ENSMUSG00000026536	Ifi211	83.6343	126.04	41.2287	0.327108	-1.61216	9.59039e-08	1.1982e-05	1	173896345	173913046	-	1785	GO:0000122;GO:0000978;GO:0001227;GO:0002218;GO:0002218;GO:0002218;GO:0003690;GO:0003690;GO:0005634;GO:0005634;GO:0005730;GO:0005730;GO:0005829;GO:0008134;GO:0009617;GO:0016607;GO:0032731;GO:0034399;GO:0035458;GO:0035458;GO:0035458;GO:0042802;	-	-	NOG81691	S	interferon activated gene 211 [Source:MGISymbol;Acc:MGI:3041120]	381308	P0DOV1
ENSMUSG00000024190	Dusp1	1184.45	1782.3	586.587	0.329117	-1.60333	1.08041e-48	2.87964e-45	17	26505590	26562128	-	3311	GO:0000188;GO:0000188;GO:0000188;GO:0004721;GO:0004722;GO:0004725;GO:0004725;GO:0004725;GO:0004725;GO:0004725;GO:0005634;GO:0005634;GO:0005634;GO:0005634;GO:0005634;GO:0005737;GO:0005737;GO:0005737;GO:0005737;GO:0006470;GO:0006470;GO:0006470;GO:0006470;GO:0007049;GO:0007162;GO:0007162;GO:0008138;GO:0008138;GO:0008138;GO:0008138;GO:0008138;GO:0008285;GO:0008330;GO:0008330;GO:0009416;GO:0010033;GO:…	K21278	-	COG2453	T	dual specificity phosphatase 1 [Source:MGISymbol;Acc:MGI:105120]	19252	P28563;Q3U8K3
ENSMUSG00000047495	Dlgap2	13.3311	19.993	6.66919	0.333577	-1.58391	0.0410242	0.289395	8	14095865	14847680	+	6149	GO:0007270;GO:0007270;GO:0023052;GO:0023052;GO:0005886;GO:0007270;GO:0007270;GO:0014069;GO:0016020;GO:0019904;GO:0023052;GO:0023052;GO:0030054;GO:0030425;GO:0043197;GO:0045202;GO:0045211;GO:0098962;GO:0005886;GO:0007270;GO:0007270;GO:0014069;GO:0016020;GO:0019904;GO:0023052;GO:0023052;GO:0030054;GO:0030425;GO:0043197;GO:0045202;GO:0045211;GO:0098962;GO:0005886;GO:0007270;GO:0007270;GO:0014069;GO:…	-	-	NOG329647	-	DLG associated protein 2 [Source:MGISymbol;Acc:MGI:2443181]	244310	Q8BJ42;Q0VF59;Q3V2X4
ENSMUSG00000028015	Ctso	138.357	207.181	69.5325	0.335613	-1.57513	4.38113e-11	1.29746e-08	3	81932601	81956725	+	5123	GO:0004197;GO:0005615;GO:0005764;GO:0005764;GO:0006508;GO:0006508;GO:0006508;GO:0008233;GO:0008234;GO:0008234;GO:0008234;GO:0016787;GO:0051603;	K01374	EC:3.4.22.42	COG4870	O	cathepsin O [Source:MGI Symbol;Acc:MGI:2139628]"	229445	Q8BM88;Q4QQL3
ENSMUSG00000028860	Sytl1	19.215	28.7676	9.66228	0.335873	-1.57401	0.0269821	0.224973	4	133253090	133263113	-	2518	GO:0005623;GO:0006886;GO:0006886;GO:0006887;GO:0006887;GO:0017137;GO:0017137;GO:0005886;GO:0006886;GO:0006886;GO:0006887;GO:0006887;GO:0006887;GO:0017137;GO:0017137;	K17598	-	-	-	synaptotagmin-like 1 [Source:MGISymbol;Acc:MGI:1933365]	269589	Q6KAP5;A2AE94
ENSMUSG00000053007	Creb5	22.9643	34.3427	11.5858	0.337358	-1.56765	0.00678358	0.0921691	6	53287270	53700376	+	25021	GO:0003676;GO:0003676;GO:0003700;GO:0003700;GO:0003700;GO:0006355;GO:0006355;GO:0045893;GO:0003676;GO:0003676;GO:0003700;GO:0003700;GO:0006355;GO:0006355;GO:0003676;GO:0003676;GO:0003700;GO:0003700;GO:0006355;GO:0006355;GO:0003700;GO:0003700;GO:0006355;GO:0006355;	K09047	-	NOG286140	-	cAMP responsive element binding protein 5[Source:MGI Symbol;Acc:MGI:2443973]	231991	Q8K1L0;A0A0N4SUK5
ENSMUSG00000028794	A3galt2	16.7296	24.9742	8.48491	0.339747	-1.55747	0.02363	0.208664	4	128755364	128769298	+	3588	GO:0001962;GO:0005794;GO:0005794;GO:0005794;GO:0005975;GO:0005975;GO:0006688;GO:0006688;GO:0016020;GO:0016020;GO:0016020;GO:0016021;GO:0016740;GO:0016757;GO:0016757;GO:0016757;GO:0016758;GO:0016758;GO:0030259;GO:0030259;GO:0030259;GO:0031982;GO:0031982;GO:0031982;GO:0032580;GO:0046872;GO:0047276;GO:0071287;GO:0001962;GO:0005794;GO:0005794;GO:0005794;GO:0005794;GO:0005975;GO:0005975;GO:0006688;GO:…	K20736	EC:2.4.1.87	NOG277430	-	alpha 1,3-galactosyltransferase 2(isoglobotriaosylceramide synthase) [Source:MGISymbol;Acc:MGI:2685279]	215493	Q3V1N9
ENSMUSG00000059824	Dbp	150.4	224.437	76.3634	0.340245	-1.55536	1.22063e-11	3.90406e-09	7	45705088	45710203	+	2993	GO:0000977;GO:0000977;GO:0000977;GO:0000977;GO:0000977;GO:0001228;GO:0001228;GO:0001228;GO:0001889;GO:0003677;GO:0003700;GO:0003700;GO:0005634;GO:0005634;GO:0005634;GO:0005634;GO:0005634;GO:0005634;GO:0005654;GO:0006355;GO:0006355;GO:0006355;GO:0006357;GO:0006357;GO:0007623;GO:0007623;GO:0007623;GO:0045944;GO:0045944;GO:0045944;GO:0048511;GO:0000977;GO:0000977;GO:0003700;GO:0003700;GO:0005634;GO:…	K09056	-	NOG238019	-	D site albumin promoter binding protein [Source:MGISymbol;Acc:MGI:94866]	13170	Q60925;Q3USN7
ENSMUSG00000033967	Rnf225	51.9941	77.554	26.4342	0.340849	-1.5528	4.36213e-05	0.00201616	7	12927416	12931072	+	3239	GO:0003674;GO:0005575;GO:0008150;GO:0016020;GO:0016021;GO:0046872;	-	-	NOG285661	-	ring finger protein 225 [Source:MGISymbol;Acc:MGI:1924198]	381845	Q9D7D1
ENSMUSG00000028680	Plk3	655.142	976.902	333.381	0.341263	-1.55104	4.23189e-33	9.66805e-30	4	117128655	117133963	-	2531	GO:0000082;GO:0000122;GO:0000166;GO:0000302;GO:0002039;GO:0004672;GO:0004672;GO:0004674;GO:0004674;GO:0004674;GO:0004674;GO:0005515;GO:0005524;GO:0005524;GO:0005524;GO:0005634;GO:0005730;GO:0005737;GO:0005795;GO:0005813;GO:0006468;GO:0006468;GO:0006970;GO:0006974;GO:0009314;GO:0016301;GO:0016310;GO:0016740;GO:0030425;GO:0031122;GO:0032465;GO:0043025;GO:0043066;GO:0051302;GO:0090166;GO:0090316;GO:…	K08862	EC:2.7.11.21	-	-	polo like kinase 3 [Source:MGISymbol;Acc:MGI:109604]	12795	Q6P571
ENSMUSG00000019970	Sgk1	3237.59	4815.95	1659.24	0.344529	-1.5373	1.80148e-65	7.20233e-62	10	21882184	21999903	+	4903	GO:0000166;GO:0004672;GO:0004672;GO:0004672;GO:0004674;GO:0004674;GO:0004674;GO:0004674;GO:0004674;GO:0004712;GO:0004712;GO:0005515;GO:0005515;GO:0005524;GO:0005524;GO:0005524;GO:0005634;GO:0005634;GO:0005634;GO:0005737;GO:0005737;GO:0005737;GO:0005739;GO:0005783;GO:0005789;GO:0005829;GO:0005829;GO:0005829;GO:0005886;GO:0006468;GO:0006468;GO:0006468;GO:0006883;GO:0006915;GO:0006974;GO:0007019;GO:…	K13302	EC:2.7.11.1	COG0515	T	serum/glucocorticoid regulated kinase 1 [Source:MGISymbol;Acc:MGI:1340062]	20393	Q9WVC6
ENSMUSG00000056508	1700001K19Rik	15.9153	23.6244	8.20616	0.347359	-1.5255	0.0278885	0.229538	12	110667688	110682619	-	955	GO:0003674;GO:0005575;GO:0008150;GO:0003674;GO:0005575;GO:0008150;	-	-	NOG78409	-	RIKEN cDNA 1700001K19 gene [Source:MGISymbol;Acc:MGI:1913573]	66323	Q80ZT1
ENSMUSG00000051855	Mest	31.1771	46.2113	16.1428	0.349326	-1.51735	0.00212956	0.0405427	6	30723547	30748465	+	3945	GO:0003824;GO:0003824;GO:0003824;GO:0003824;GO:0005783;GO:0005789;GO:0010883;GO:0010883;GO:0016020;GO:0016021;GO:0016787;GO:0032526;GO:0003824;GO:0003824;GO:0005783;GO:0005789;GO:0010883;GO:0010883;GO:0016020;GO:0016021;GO:0016787;GO:0032526;GO:0003824;GO:0003824;GO:0016020;GO:0016021;	-	-	COG0596	R	mesoderm specific transcript [Source:MGISymbol;Acc:MGI:96968]	17294	Q07646
ENSMUSG00000021061	Sptb	38.2624	56.3733	20.1516	0.357466	-1.48412	0.000828337	0.0205058	12	76580488	76710547	-	12147	GO:0003779;GO:0003779;GO:0003779;GO:0005200;GO:0005200;GO:0005200;GO:0005515;GO:0005543;GO:0005543;GO:0005737;GO:0005794;GO:0005829;GO:0005856;GO:0007010;GO:0008091;GO:0008091;GO:0014731;GO:0030506;GO:0032991;GO:0051015;GO:0051693;GO:0003779;GO:0003779;GO:0003779;GO:0005200;GO:0005200;GO:0005200;GO:0005515;GO:0005737;GO:0005856;GO:0007010;GO:0008091;GO:0008091;GO:0051693;	K06115	-	-	-	spectrin beta, erythrocytic [Source:MGISymbol;Acc:MGI:98387]	20741	Q3UGX2
ENSMUSG00000054364	Rhob	1619.29	2384.58	854.002	0.358136	-1.48142	1.0904e-31	2.17972e-28	12	8497661	8500009	-	2349	GO:0000166;GO:0000281;GO:0000281;GO:0000281;GO:0001525;GO:0003924;GO:0003924;GO:0003924;GO:0005515;GO:0005525;GO:0005525;GO:0005525;GO:0005525;GO:0005622;GO:0005634;GO:0005737;GO:0005768;GO:0005769;GO:0005770;GO:0005829;GO:0005829;GO:0005886;GO:0005886;GO:0005886;GO:0005886;GO:0005886;GO:0005938;GO:0006886;GO:0006915;GO:0007015;GO:0007155;GO:0007264;GO:0007264;GO:0007266;GO:0007275;GO:0008333;GO:…	K07856	-	COG1100	R	ras homolog family member B [Source:MGISymbol;Acc:MGI:107949]	11852	P62746;Q4FJM5
ENSMUSG00000004933	Matk	34.4268	50.5986	18.255	0.36078	-1.47081	0.00161179	0.0327519	10	81252935	81263365	+	4594	GO:0000166;GO:0004672;GO:0004672;GO:0004713;GO:0004713;GO:0004713;GO:0004715;GO:0005515;GO:0005524;GO:0005524;GO:0005524;GO:0006468;GO:0006468;GO:0016301;GO:0016310;GO:0016740;GO:0018108;GO:0000166;GO:0004672;GO:0004672;GO:0004713;GO:0004713;GO:0004713;GO:0004715;GO:0005515;GO:0005524;GO:0005524;GO:0005524;GO:0006468;GO:0006468;GO:0016301;GO:0016310;GO:0016740;GO:0018108;GO:0000166;GO:0004672;GO:…	K08888	EC:2.7.10.2	COG0515	T	megakaryocyte-associated tyrosine kinase[Source:MGI Symbol;Acc:MGI:99259]	17179	P41242;A0A0R4J1N6
ENSMUSG00000045620	Odf3l1	25.7504	37.7489	13.7519	0.364299	-1.4568	0.00673042	0.0916024	9	56848659	56864679	-	1306	GO:0003674;GO:0005575;GO:0008150;	-	-	NOG80931	S	outer dense fiber of sperm tails 3-like 1[Source:MGI Symbol;Acc:MGI:2681875]	382075	Q810P2
ENSMUSG00000024427	Spry4	84.6515	124.002	45.3006	0.36532	-1.45277	1.36463e-06	0.000110778	18	38586247	38601415	-	4755	GO:0005515;GO:0005737;GO:0005829;GO:0007275;GO:0007275;GO:0007275;GO:0009966;GO:0009966;GO:0016020;GO:0016020;GO:0016020;GO:0040037;GO:0043407;GO:0043407;GO:0046580;GO:0070373;GO:0070373;GO:1990830;	K17385	-	NOG68509	S	sprouty RTK signaling antagonist 4 [Source:MGISymbol;Acc:MGI:1345144]	24066	Q9WTP2
ENSMUSG00000040327	Cul9	19.693	28.8427	10.5432	0.36554	-1.4519	0.020092	0.186917	17	46500572	46546388	-	12198	GO:0000226;GO:0000226;GO:0000226;GO:0005829;GO:0006511;GO:0006511;GO:0007088;GO:0007088;GO:0007088;GO:0016567;GO:0016567;GO:0016567;GO:0016740;GO:0031461;GO:0031461;GO:0031461;GO:0031625;GO:0031625;GO:0046872;GO:0000226;GO:0000226;GO:0006511;GO:0006511;GO:0007088;GO:0007088;GO:0016567;GO:0016567;GO:0016740;GO:0031461;GO:0031461;GO:0031625;GO:0031625;GO:0046872;	K11970	-	-	-	cullin 9 [Source:MGI Symbol;Acc:MGI:1925559]"	78309	S4R1Y1
ENSMUSG00000045362	Tnfrsf26	15.1653	22.1244	8.20616	0.37091	-1.43086	0.0434587	0.296434	7	143607659	143628722	-	3218	GO:0016020;GO:0016021;GO:0005515;GO:0016020;GO:0016021;	K05161	-	NOG40829	-	tumor necrosis factor receptor superfamily, member26 [Source:MGI Symbol;Acc:MGI:2651928]	244237	P83626;Q3U3N2
ENSMUSG00000029380	Cxcl1	1848.88	2694.57	1003.19	0.372299	-1.42547	3.89181e-05	0.00185042	5	90891241	90893115	+	1875	GO:0002237;GO:0002526;GO:0005125;GO:0005576;GO:0005576;GO:0005576;GO:0005615;GO:0005615;GO:0005615;GO:0005615;GO:0005623;GO:0006935;GO:0006935;GO:0006935;GO:0006952;GO:0006952;GO:0006954;GO:0006954;GO:0006955;GO:0006955;GO:0006955;GO:0007165;GO:0007204;GO:0008009;GO:0008009;GO:0008009;GO:0008009;GO:0008083;GO:0010765;GO:0030593;GO:0030593;GO:0030595;GO:0032930;GO:0043268;GO:0060326;GO:0061844;GO:…	K05505	-	NOG83801	S	chemokine (C-X-C motif) ligand 1 [Source:MGISymbol;Acc:MGI:108068]	14825	P12850;A2RTH0
ENSMUSG00000028716	Pdzk1ip1	15.8198	22.993	8.64661	0.376055	-1.41099	0.0419038	0.291736	4	115088708	115093899	+	1778	GO:0016020;GO:0016020;GO:0016020;GO:0016021;GO:0003674;GO:0008150;GO:0016020;GO:0016020;GO:0016020;GO:0016021;GO:0003674;GO:0008150;GO:0016020;GO:0016020;GO:0016020;GO:0016021;GO:0003674;GO:0008150;GO:0016020;GO:0016020;GO:0016020;GO:0016021;	-	-	NOG41669	S	PDZK1 interacting protein 1 [Source:MGISymbol;Acc:MGI:1914432]	67182	Q9CQH0
ENSMUSG00000049690	Nckap5	70.4274	102.34	38.5144	0.376336	-1.40991	1.48134e-05	0.00082775	1	125913620	126830799	-	12100	GO:0001578;GO:0003674;GO:0007019;GO:0035371;GO:0001578;GO:0003674;GO:0007019;GO:0035371;GO:0001578;GO:0003674;GO:0007019;GO:0035371;GO:0001578;GO:0003674;GO:0007019;GO:0035371;GO:0001578;GO:0003674;GO:0007019;GO:0035371;GO:0001578;GO:0003674;GO:0007019;GO:0035371;GO:0001578;GO:0003674;GO:0007019;GO:0035371;GO:0001578;GO:0003674;GO:0007019;GO:0035371;	-	-	NOG85857	S	NCK-associated protein 5 [Source:MGISymbol;Acc:MGI:2686394]	210356	Q8C6S8;Q6NZK2;E9QAE1
ENSMUSG00000079014	Serpina3i	22.6407	32.824	12.4575	0.379524	-1.39774	0.0490897	0.317061	12	104263122	104269372	+	2224	GO:0004867;GO:0005615;GO:0005615;GO:0005615;GO:0010951;GO:0034097;GO:0043434;	K04525	-	-	-	serine (or cysteine) peptidase inhibitor, clade A,member 3I [Source:MGI Symbol;Acc:MGI:2182841]	628900	D3Z450
ENSMUSG00000052565	Hist1h1d	17.5629	25.4366	9.68923	0.380916	-1.39245	0.0331065	0.254779	13	23553262	23560686	+	7425	GO:0000122;GO:0000786;GO:0000786;GO:0000790;GO:0000790;GO:0000790;GO:0003677;GO:0003677;GO:0003677;GO:0003677;GO:0003690;GO:0005515;GO:0005634;GO:0005634;GO:0005634;GO:0005634;GO:0005694;GO:0005719;GO:0005719;GO:0005719;GO:0006334;GO:0006334;GO:0006355;GO:0006357;GO:0016584;GO:0016584;GO:0030261;GO:0031490;GO:0031490;GO:0031492;GO:0031936;GO:0045910;GO:0080182;GO:0098532;	K11275	-	NOG258621	-	histone cluster 1, H1d [Source:MGISymbol;Acc:MGI:107502]	14957	P43277;Q149Z9
ENSMUSG00000046157	Tmem229b	20.6845	29.9179	11.451	0.382749	-1.38553	0.0292925	0.235164	12	78961795	79007627	-	4732	GO:0003674;GO:0005575;GO:0009617;GO:0016020;GO:0016021;GO:0003674;GO:0005575;GO:0009617;GO:0016020;GO:0016021;GO:0003674;GO:0005575;GO:0009617;GO:0016020;GO:0016021;GO:0003674;GO:0005575;GO:0009617;GO:0016020;GO:0016021;GO:0016020;GO:0016021;	-	-	NOG45696	-	transmembrane protein 229B [Source:MGISymbol;Acc:MGI:2444389]	268567	Q8BFQ2
ENSMUSG00000024678	Ms4a4d	35.9116	51.7794	20.0438	0.387099	-1.36923	0.0266462	0.223688	19	11536801	11558467	+	1513	GO:0003674;GO:0005575;GO:0008150;GO:0016020;GO:0016021;GO:0016021;GO:0016021;	K22190	-	NOG41861	-	membrane-spanning 4-domains, subfamily A, member 4D[Source:MGI Symbol;Acc:MGI:1913857]	66607	Q99N05
ENSMUSG00000022415	Syngr1	18.8003	27.0305	10.5701	0.391044	-1.3546	0.0345071	0.261163	15	80091334	80119501	+	4808	GO:0006605;GO:0008021;GO:0016020;GO:0016020;GO:0016020;GO:0016021;GO:0030054;GO:0030285;GO:0030672;GO:0030672;GO:0030672;GO:0031410;GO:0031594;GO:0042470;GO:0045055;GO:0045055;GO:0045202;GO:0048169;GO:0048172;GO:0048499;GO:0048499;GO:1990830;GO:0006605;GO:0006605;GO:0008021;GO:0008021;GO:0016020;GO:0016020;GO:0016020;GO:0016021;GO:0030054;GO:0030285;GO:0030285;GO:0030672;GO:0030672;GO:0030672;GO:…	-	-	NOG306774	-	synaptogyrin 1 [Source:MGI Symbol;Acc:MGI:1328323]"	20972	O55100
ENSMUSG00000012126	Ubxn11	21.4802	30.8803	12.0802	0.391193	-1.35405	0.0229112	0.20389	4	134102570	134127593	+	4742	GO:0005515;GO:0005575;GO:0005737;GO:0005856;GO:0043130;GO:0043161;GO:0005515;	-	-	NOG255634	-	UBX domain protein 11 [Source:MGISymbol;Acc:MGI:1914836]	67586	Q9D572
ENSMUSG00000038578	Susd1	26.9556	38.7301	15.181	0.391971	-1.35118	0.0102064	0.120281	4	59314683	59438633	-	4766	GO:0003674;GO:0005509;GO:0005509;GO:0005575;GO:0008150;GO:0016020;GO:0016021;GO:0003674;GO:0005509;GO:0005509;GO:0005575;GO:0008150;GO:0016020;GO:0016021;	-	-	NOG330256	-	sushi domain containing 1 [Source:MGISymbol;Acc:MGI:3651543]	634731	E9Q3H4
ENSMUSG00000021701	Plk2	5456.22	7838.63	3073.81	0.392136	-1.35057	8.84236e-58	2.82814e-54	13	110395046	110400844	+	4491	GO:0000082;GO:0000082;GO:0000082;GO:0000082;GO:0000166;GO:0000278;GO:0000278;GO:0000785;GO:0000922;GO:0004672;GO:0004672;GO:0004674;GO:0004674;GO:0004674;GO:0004674;GO:0004674;GO:0005515;GO:0005524;GO:0005524;GO:0005524;GO:0005634;GO:0005737;GO:0005737;GO:0005737;GO:0005737;GO:0005813;GO:0005813;GO:0005813;GO:0005813;GO:0005814;GO:0005814;GO:0005814;GO:0005814;GO:0005856;GO:0006468;GO:0006468;GO:…	K08861	EC:2.7.11.21	COG0515	T	polo like kinase 2 [Source:MGISymbol;Acc:MGI:1099790]	20620	P53351;Q548A9;Q3TV29
ENSMUSG00000032482	Cspg5	22.5113	32.2864	12.7362	0.394476	-1.34199	0.0190508	0.180915	9	110243783	110262576	+	10074	GO:0000139;GO:0005783;GO:0005789;GO:0005794;GO:0005794;GO:0005794;GO:0005886;GO:0007010;GO:0007010;GO:0007275;GO:0007399;GO:0009986;GO:0016020;GO:0016021;GO:0030154;GO:0030660;GO:0030660;GO:0030660;GO:0040008;GO:0050804;GO:0098978;GO:0098982;GO:0099055;GO:0099550;GO:0106091;GO:0106091;GO:1900026;GO:1900026;GO:2000300;GO:0000139;GO:0005783;GO:0005789;GO:0005794;GO:0005794;GO:0005886;GO:0007010;GO:…	K08116	-	NOG39505	S	chondroitin sulfate proteoglycan 5 [Source:MGISymbol;Acc:MGI:1352747]	29873	Q71M36
ENSMUSG00000028268	Gbp3	199.244	285.021	113.466	0.398098	-1.32881	0.00129036	0.0282678	3	142560026	142573209	+	3265	GO:0000166;GO:0003924;GO:0003924;GO:0005525;GO:0005525;GO:0005525;GO:0000139;GO:0000166;GO:0003924;GO:0003924;GO:0003924;GO:0003924;GO:0005525;GO:0005525;GO:0005525;GO:0005525;GO:0005634;GO:0005634;GO:0005737;GO:0005794;GO:0005829;GO:0016020;GO:0016787;GO:0020005;GO:0020005;GO:0031410;GO:0031410;GO:0035458;GO:0042803;GO:0042832;GO:0042832;GO:0044406;GO:0048471;GO:0048471;GO:0050830;GO:0050830;GO:…	K20899	-	NOG288755	-	guanylate binding protein 3 [Source:MGISymbol;Acc:MGI:1926263]	55932	Q61107
ENSMUSG00000024803	Ankrd1	1238	1769.1	706.895	0.399578	-1.32345	4.30721e-07	4.14945e-05	19	36111961	36120099	-	2886	GO:0000122;GO:0001085;GO:0001650;GO:0002039;GO:0003677;GO:0003713;GO:0005515;GO:0005634;GO:0005634;GO:0005737;GO:0005829;GO:0008134;GO:0010976;GO:0031432;GO:0031674;GO:0035994;GO:0042826;GO:0043065;GO:0043517;GO:0050714;GO:0055008;GO:0070412;GO:0071222;GO:0071260;GO:0071347;GO:0071356;GO:0071407;GO:0071456;GO:0071560;GO:2000279;GO:0000122;GO:0001085;GO:0001650;GO:0002039;GO:0003677;GO:0003713;GO:…	K21433	-	COG0666	R	ankyrin repeat domain 1 (cardiac muscle)[Source:MGI Symbol;Acc:MGI:1097717]	107765	Q9CR42
ENSMUSG00000025085	Ablim1	620.33	886.418	354.241	0.399632	-1.32326	6.95695e-11	1.88569e-08	19	57032733	57314919	-	11949	GO:0001725;GO:0003779;GO:0003779;GO:0007010;GO:0007010;GO:0030027;GO:0030032;GO:0046872;GO:0060271;GO:0003779;GO:0003779;GO:0007010;GO:0007010;GO:0003779;GO:0003779;GO:0007010;GO:0007010;GO:0001725;GO:0001725;GO:0003779;GO:0003779;GO:0003779;GO:0003779;GO:0005515;GO:0005737;GO:0005856;GO:0007010;GO:0007010;GO:0007411;GO:0014069;GO:0015629;GO:0015629;GO:0030027;GO:0030032;GO:0030032;GO:0045944;GO:…	K07520	-	NOG302299	-	actin-binding LIM protein 1 [Source:MGISymbol;Acc:MGI:1194500]	226251	Q8K4G5;E9QK41
ENSMUSG00000033730	Egr3	315.378	448.223	182.532	0.407235	-1.29607	1.33922e-13	6.11907e-11	14	70077203	70082614	+	4406	GO:0003676;GO:0003676;GO:0003677;GO:0005634;GO:0046872;GO:0000977;GO:0000981;GO:0001228;GO:0001938;GO:0001938;GO:0002042;GO:0002042;GO:0003676;GO:0003676;GO:0003677;GO:0005634;GO:0005634;GO:0006357;GO:0007274;GO:0007422;GO:0033089;GO:0035767;GO:0035767;GO:0035924;GO:0035924;GO:0043066;GO:0043066;GO:0043565;GO:0044344;GO:0044344;GO:0045586;GO:0045944;GO:0045944;GO:0046872;GO:0071363;	K12497	-	COG5048	R	early growth response 3 [Source:MGISymbol;Acc:MGI:1306780]	13655	P43300
ENSMUSG00000057286	St6galnac2	18.6206	26.4554	10.7857	0.407695	-1.29444	0.0392073	0.281337	11	116675303	116694868	-	5790	GO:0000139;GO:0001665;GO:0001665;GO:0001665;GO:0005794;GO:0006486;GO:0006486;GO:0006486;GO:0006486;GO:0006486;GO:0006493;GO:0006493;GO:0006493;GO:0008373;GO:0008373;GO:0016020;GO:0016021;GO:0016740;GO:0016757;GO:1990743;GO:1990743;GO:1990743;	K06616	EC:2.4.99.-	NOG285163	-	ST6 (alpha-N-acetyl-neuraminyl-2,3-beta-galactosyl-1,3)-N-acetylgalactosaminide alpha-2,6-sialyltransferase 2[Source:MGI Symbol;Acc:MGI:107553]	20446	P70277
ENSMUSG00000031990	Jam3	46.3205	65.6855	26.9555	0.410372	-1.28499	0.00119613	0.0267531	9	27097384	27155421	-	3200	GO:0001525;GO:0001525;GO:0001525;GO:0001780;GO:0002250;GO:0002318;GO:0002523;GO:0005178;GO:0005178;GO:0005515;GO:0005576;GO:0005615;GO:0005615;GO:0005615;GO:0005794;GO:0005794;GO:0005886;GO:0005887;GO:0005887;GO:0005887;GO:0005911;GO:0005923;GO:0005923;GO:0005923;GO:0007155;GO:0007155;GO:0007160;GO:0007283;GO:0007283;GO:0007286;GO:0009986;GO:0016020;GO:0016021;GO:0016477;GO:0019226;GO:0030010;GO:…	K06785	-	NOG147320	S	junction adhesion molecule 3 [Source:MGISymbol;Acc:MGI:1933825]	83964	Q9D8B7
ENSMUSG00000064247	Plcxd1	20.7907	29.4742	12.1071	0.41077	-1.2836	0.0337954	0.259087	5	110099969	110105953	+	3811	GO:0006629;GO:0006629;GO:0008081;GO:0008081;GO:0006629;GO:0006629;GO:0008081;GO:0008081;GO:0006629;GO:0008081;	-	-	-	-	phosphatidylinositol-specific phospholipase C, Xdomain containing 1 [Source:MGI Symbol;Acc:MGI:2685422]	403178	-
ENSMUSG00000022389	Tef	1738.53	2462.9	1014.16	0.411775	-1.28007	3.30263e-22	3.30098e-19	15	81802421	81826863	+	7867	GO:0000977;GO:0000978;GO:0001228;GO:0003677;GO:0003690;GO:0003700;GO:0003700;GO:0005634;GO:0005634;GO:0005634;GO:0005634;GO:0005634;GO:0006355;GO:0006355;GO:0006357;GO:0006357;GO:0042803;GO:0043565;GO:0043565;GO:0043565;GO:0045944;GO:0046982;GO:0048511;GO:0003700;GO:0003700;GO:0005634;GO:0005634;GO:0006357;GO:0006357;GO:0043565;GO:0043565;GO:0000977;GO:0000978;GO:0001228;GO:0003677;GO:0003690;GO:…	K09058	-	NOG323431	-	thyrotroph embryonic factor [Source:MGISymbol;Acc:MGI:98663]	21685	Q9JLC6
ENSMUSG00000034394	Lif	416.795	589.867	243.724	0.413184	-1.27514	0.0015748	0.0321638	11	4257557	4272514	+	4350	GO:0001974;GO:0005102;GO:0005102;GO:0005125;GO:0005125;GO:0005125;GO:0005125;GO:0005125;GO:0005125;GO:0005146;GO:0005146;GO:0005146;GO:0005146;GO:0005146;GO:0005576;GO:0005576;GO:0005576;GO:0005615;GO:0005615;GO:0005615;GO:0005615;GO:0005829;GO:0005829;GO:0006955;GO:0006955;GO:0007260;GO:0007566;GO:0008083;GO:0008083;GO:0008083;GO:0008083;GO:0008284;GO:0008284;GO:0008284;GO:0008285;GO:0010628;GO:…	K05419	-	NOG45686	-	leukemia inhibitory factor [Source:MGISymbol;Acc:MGI:96787]	16878	P09056
ENSMUSG00000000078	Klf6	3530.88	4990.55	2071.21	0.415026	-1.26873	1.48863e-28	2.38062e-25	13	5861482	5870394	+	4391	GO:0000978;GO:0001228;GO:0001650;GO:0003676;GO:0003676;GO:0005634;GO:0005730;GO:0005829;GO:0043231;GO:0045944;	K09207	-	-	-	Kruppel-like factor 6 [Source:MGISymbol;Acc:MGI:1346318]	23849	Q8BPQ2
ENSMUSG00000035385	Ccl2	4877.57	6893.22	2861.92	0.415179	-1.26819	0.000401736	0.0118994	11	82035571	82037453	+	1138	GO:0001525;GO:0001664;GO:0001666;GO:0001912;GO:0001912;GO:0001938;GO:0001938;GO:0002523;GO:0002523;GO:0002544;GO:0002548;GO:0002687;GO:0002687;GO:0002693;GO:0002693;GO:0005125;GO:0005125;GO:0005515;GO:0005515;GO:0005576;GO:0005576;GO:0005576;GO:0005615;GO:0005615;GO:0005615;GO:0005615;GO:0005615;GO:0005737;GO:0005737;GO:0005791;GO:0005791;GO:0006874;GO:0006874;GO:0006935;GO:0006954;GO:0006954;GO:…	K14624	-	NOG46819	-	chemokine (C-C motif) ligand 2 [Source:MGISymbol;Acc:MGI:98259]	20296	P10148;Q5SVU3
ENSMUSG00000078853	Igtp	99.5871	140.383	58.7914	0.418794	-1.25569	0.000810801	0.0201654	11	58199556	58207591	+	2022	GO:0003924;GO:0003924;GO:0005525;GO:0005525;GO:0005789;GO:0005829;GO:0006952;GO:0016020;GO:0016020;GO:0035458;GO:0035458;GO:0003924;GO:0003924;GO:0005789;GO:0005829;GO:0006952;GO:0035458;GO:0035458;GO:0003924;GO:0003924;GO:0005789;GO:0005829;GO:0006952;GO:0035458;GO:0035458;	K14140	-	-	-	interferon gamma induced GTPase [Source:MGISymbol;Acc:MGI:107729]	16145	Q9DCE9
ENSMUSG00000027318	Adam33	18.7547	26.4179	11.0914	0.419846	-1.25207	0.0488682	0.316525	2	131050591	131063814	-	5394	GO:0004222;GO:0004222;GO:0004222;GO:0006508;GO:0006508;GO:0006508;GO:0008233;GO:0008237;GO:0008237;GO:0008237;GO:0008270;GO:0016020;GO:0016021;GO:0016787;GO:0042035;GO:0042127;GO:0046872;GO:0004222;GO:0004222;GO:0006508;GO:0006508;GO:0008237;GO:0008237;GO:0004222;GO:0004222;GO:0006508;GO:0006508;GO:0008233;GO:0008237;GO:0008237;GO:0008270;GO:0016020;GO:0016021;GO:0016787;GO:0042035;GO:0042127;GO:…	K08616	EC:3.4.24.-	NOG294463	-	a disintegrin and metallopeptidase domain 33[Source:MGI Symbol;Acc:MGI:1341813]	110751	Q923W9;A2AP51
ENSMUSG00000027995	Tlr2	461.468	649.463	273.474	0.421077	-1.24785	0.0259657	0.219706	3	83836272	83841767	-	3014	GO:0001530;GO:0001540;GO:0001666;GO:0001774;GO:0001775;GO:0002224;GO:0002237;GO:0002237;GO:0002374;GO:0002376;GO:0002755;GO:0002755;GO:0005515;GO:0005737;GO:0005794;GO:0005886;GO:0006691;GO:0006954;GO:0006954;GO:0006954;GO:0007165;GO:0007165;GO:0007252;GO:0008285;GO:0008329;GO:0009636;GO:0009986;GO:0009986;GO:0010628;GO:0016020;GO:0016021;GO:0016021;GO:0016021;GO:0030177;GO:0031226;GO:0032289;GO:…	K10159	-	-	-	toll-like receptor 2 [Source:MGISymbol;Acc:MGI:1346060]	24088	Q9QUN7;G3X8Y8
ENSMUSG00000030790	Adm	75.0807	105.634	44.5275	0.421526	-1.2463	0.000140159	0.00534945	7	110627661	110629820	+	1619	GO:0001570;GO:0001570;GO:0001666;GO:0001843;GO:0002026;GO:0002026;GO:0002031;GO:0002031;GO:0003073;GO:0003073;GO:0005179;GO:0005179;GO:0005179;GO:0005576;GO:0005576;GO:0005576;GO:0005615;GO:0005615;GO:0005615;GO:0005737;GO:0005737;GO:0007189;GO:0007189;GO:0007204;GO:0007204;GO:0007507;GO:0007507;GO:0007565;GO:0007568;GO:0008209;GO:0008209;GO:0008284;GO:0008285;GO:0008285;GO:0009409;GO:0009611;GO:…	K12333	-	NOG46109	-	adrenomedullin [Source:MGI Symbol;Acc:MGI:108058]"	11535	P97297
ENSMUSG00000034949	Zfr2	51.0585	71.8357	30.2812	0.421535	-1.24628	0.00228227	0.0428884	10	81233155	81252123	+	7483	GO:0003725;GO:0003727;GO:0005634;GO:0008150;GO:0003676;GO:0003676;GO:0003723;GO:0003723;GO:0003725;GO:0003727;GO:0005524;GO:0005524;GO:0005634;GO:0006955;GO:0006955;GO:0008150;GO:0008270;GO:0008270;GO:0016740;GO:0016740;GO:0003725;GO:0003727;GO:0005634;GO:0008150;	-	-	-	-	zinc finger RNA binding protein 2 [Source:MGISymbol;Acc:MGI:2143792]	103406	E9Q5M4
ENSMUSG00000028957	Per3	791.132	1107.98	474.279	0.428055	-1.22413	1.57226e-24	1.93412e-21	4	151003652	151044665	-	9608	GO:0000122;GO:0000122;GO:0000122;GO:0000976;GO:0001222;GO:0005515;GO:0005515;GO:0005515;GO:0005634;GO:0005634;GO:0005634;GO:0005634;GO:0005737;GO:0005737;GO:0005737;GO:0005737;GO:0007623;GO:0008134;GO:0009416;GO:0019900;GO:0031625;GO:0032922;GO:0032922;GO:0032922;GO:0043153;GO:0045187;GO:0045187;GO:0045187;GO:0048511;GO:0050821;GO:0050821;GO:0050821;GO:0032922;	K21945	-	NOG269786	-	period circadian clock 3 [Source:MGISymbol;Acc:MGI:1277134]	18628	O70361
ENSMUSG00000022114	Spry2	282.434	394.47	170.398	0.431967	-1.21101	3.28914e-12	1.315e-09	14	105891947	105896819	-	2087	GO:0000132;GO:0005515;GO:0005634;GO:0005737;GO:0005829;GO:0005829;GO:0005856;GO:0005856;GO:0005874;GO:0005886;GO:0007275;GO:0007275;GO:0007275;GO:0007605;GO:0008285;GO:0009966;GO:0009966;GO:0010628;GO:0010628;GO:0010801;GO:0010801;GO:0015630;GO:0015630;GO:0016020;GO:0016020;GO:0016020;GO:0016020;GO:0016525;GO:0016525;GO:0019901;GO:0019901;GO:0030324;GO:0030335;GO:0030335;GO:0031345;GO:0032587;GO:…	K17383	-	NOG83905	S	sprouty RTK signaling antagonist 2 [Source:MGISymbol;Acc:MGI:1345138]	24064	Q9QXV8;B2RS85
ENSMUSG00000037434	Slc30a1	215.953	300.984	130.922	0.43498	-1.20098	4.84356e-06	0.000324093	1	191906767	191913247	+	5244	GO:0001701;GO:0005385;GO:0005385;GO:0005737;GO:0005737;GO:0005783;GO:0005783;GO:0005783;GO:0005794;GO:0005794;GO:0005794;GO:0005886;GO:0005886;GO:0005886;GO:0005886;GO:0005886;GO:0006811;GO:0006812;GO:0006812;GO:0006829;GO:0006829;GO:0006829;GO:0006829;GO:0006874;GO:0006882;GO:0006882;GO:0008324;GO:0008324;GO:0016020;GO:0016021;GO:0016021;GO:0016021;GO:0016021;GO:0016021;GO:0019855;GO:0019855;GO:…	K14688	-	COG1230	P	solute carrier family 30 (zinc transporter), member1 [Source:MGI Symbol;Acc:MGI:1345281]	22782	Q60738;Q3UM63
ENSMUSG00000031618	Nr3c2	39.1246	54.4484	23.8007	0.437124	-1.19388	0.00578777	0.0819672	8	76899442	77245012	+	6474	GO:0003677;GO:0003700;GO:0003700;GO:0005634;GO:0005634;GO:0005634;GO:0005654;GO:0006355;GO:0006355;GO:0008270;GO:0008270;GO:0043235;GO:0043565;GO:0043565;GO:0046872;GO:1901224;GO:0003677;GO:0003700;GO:0005634;GO:0005634;GO:0006355;GO:0008270;GO:0043565;GO:0046872;GO:0003677;GO:0003700;GO:0003700;GO:0005634;GO:0005634;GO:0005634;GO:0006355;GO:0006355;GO:0008270;GO:0008270;GO:0043565;GO:0043565;GO:…	K08555	-	-	-	nuclear receptor subfamily 3, group C, member 2[Source:MGI Symbol;Acc:MGI:99459]	110784	A3KN90
ENSMUSG00000078787	Cyp2t4	21.5068	29.9179	13.0958	0.437726	-1.1919	0.0443905	0.300166	7	27153714	27158668	+	1650	GO:0005506;GO:0005506;GO:0005737;GO:0006082;GO:0006805;GO:0008392;GO:0008395;GO:0016705;GO:0016705;GO:0016712;GO:0019373;GO:0020037;GO:0020037;GO:0020037;GO:0042738;GO:0043231;GO:0055114;GO:0055114;GO:0055114;GO:0005506;GO:0005506;GO:0005737;GO:0006082;GO:0006805;GO:0008392;GO:0008395;GO:0016705;GO:0016705;GO:0016712;GO:0019373;GO:0020037;GO:0020037;GO:0020037;GO:0042738;GO:0043231;GO:0055114;GO:…	K07421	-	-	-	cytochrome P450, family 2, subfamily t, polypeptide4 [Source:MGI Symbol;Acc:MGI:2686296]	384724	E9PWV0
ENSMUSG00000024486	Hbegf	215.478	299.728	131.228	0.437823	-1.19158	6.28445e-07	5.74291e-05	18	36504927	36515805	-	4834	GO:0001525;GO:0001832;GO:0005154;GO:0005154;GO:0005154;GO:0005154;GO:0005576;GO:0005576;GO:0005615;GO:0005615;GO:0005615;GO:0005615;GO:0005615;GO:0005886;GO:0005887;GO:0005887;GO:0007173;GO:0007173;GO:0007173;GO:0007173;GO:0008016;GO:0008083;GO:0008083;GO:0008083;GO:0008083;GO:0008083;GO:0008201;GO:0008201;GO:0008201;GO:0008201;GO:0008284;GO:0008284;GO:0009986;GO:0009986;GO:0016020;GO:0016021;GO:…	K08523	-	NOG45526	R	heparin-binding EGF-like growth factor [Source:MGISymbol;Acc:MGI:96070]	15200	Q06186;Q5FW64
ENSMUSG00000021127	Zfp36l1	563.767	783.799	343.735	0.43855	-1.18919	3.1063e-06	0.000223766	12	80107754	80113013	-	2990	GO:0000165;GO:0000165;GO:0000165;GO:0000288;GO:0000932;GO:0000932;GO:0000932;GO:0001570;GO:0003342;GO:0003677;GO:0003723;GO:0003729;GO:0003729;GO:0003729;GO:0003729;GO:0003730;GO:0005515;GO:0005634;GO:0005634;GO:0005634;GO:0005737;GO:0005737;GO:0005737;GO:0005829;GO:0005829;GO:0005829;GO:0006397;GO:0006402;GO:0006402;GO:0006417;GO:0006915;GO:0007275;GO:0007507;GO:0008283;GO:0009611;GO:0009611;GO:…	K18753	-	COG5063	R	zinc finger protein 36, C3H type-like 1 [Source:MGISymbol;Acc:MGI:107946]	12192	P23950;Q543H2
ENSMUSG00000030761	Myo7a	140.865	195.749	85.981	0.439241	-1.18691	0.0213073	0.194601	7	98051060	98119524	-	8874	GO:0000146;GO:0000146;GO:0000166;GO:0001750;GO:0001845;GO:0001917;GO:0003774;GO:0003774;GO:0003774;GO:0003774;GO:0003779;GO:0003779;GO:0003779;GO:0005515;GO:0005515;GO:0005515;GO:0005515;GO:0005516;GO:0005516;GO:0005516;GO:0005516;GO:0005524;GO:0005524;GO:0005524;GO:0005524;GO:0005524;GO:0005737;GO:0005737;GO:0005737;GO:0005737;GO:0005765;GO:0005765;GO:0005765;GO:0005829;GO:0005829;GO:0005829;GO:…	K10359	-	COG5022	Z	myosin VIIA [Source:MGI Symbol;Acc:MGI:104510]"	17921	P97479
ENSMUSG00000032487	Ptgs2	3704.63	5135.89	2273.38	0.442645	-1.17578	0.00118986	0.026725	1	150100031	150108227	+	4580	GO:0001516;GO:0001516;GO:0001516;GO:0001516;GO:0001516;GO:0001525;GO:0001525;GO:0004601;GO:0004601;GO:0004601;GO:0004666;GO:0004666;GO:0004666;GO:0004666;GO:0004666;GO:0005515;GO:0005737;GO:0005737;GO:0005737;GO:0005737;GO:0005783;GO:0005783;GO:0005783;GO:0005789;GO:0005901;GO:0005901;GO:0006629;GO:0006631;GO:0006633;GO:0006693;GO:0006954;GO:0006954;GO:0006954;GO:0006954;GO:0006979;GO:0006979;GO:…	K11987	EC:1.14.99.1	NOG39991	S	prostaglandin-endoperoxide synthase 2 [Source:MGISymbol;Acc:MGI:97798]	19225	Q05769
ENSMUSG00000071073	Lrrc73	135.331	187.594	83.0688	0.442811	-1.17524	7.49471e-07	6.73345e-05	17	46253531	46257315	+	2898	GO:0003674;GO:0005575;GO:0008150;GO:0003674;GO:0005575;GO:0008150;GO:0003674;GO:0005575;GO:0008150;	-	-	NOG121874	S	leucine rich repeat containing 73 [Source:MGISymbol;Acc:MGI:2684934]	224813	B2RWC4
ENSMUSG00000030921	Trim30a	292.195	404.348	180.042	0.445265	-1.16726	0.0110461	0.127268	7	104409025	104465193	-	4111	GO:0003677;GO:0004842;GO:0004842;GO:0005515;GO:0005634;GO:0005737;GO:0005737;GO:0006914;GO:0006914;GO:0008270;GO:0008270;GO:0009617;GO:0032715;GO:0032720;GO:0034122;GO:0045087;GO:0045087;GO:0045732;GO:0046598;GO:0046872;GO:0051607;GO:0051607;GO:0051865;GO:1900226;GO:2000378;	-	-	NOG310455	-	tripartite motif-containing 30A [Source:MGISymbol;Acc:MGI:98178]	20128	P15533
ENSMUSG00000019853	Hebp2	44.3218	61.1667	27.4768	0.449212	-1.15453	0.00411215	0.0653623	10	18539498	18546076	-	3930	GO:0005737;GO:0005737;GO:0005737;GO:0005737;GO:0005739;GO:0005739;GO:0005739;GO:0010917;GO:0010917;GO:0010940;GO:0010940;GO:0020037;GO:0035794;GO:0035794;	-	-	NOG86107	S	heme binding protein 2 [Source:MGISymbol;Acc:MGI:1860084]	56016	Q9WU63
ENSMUSG00000006445	Epha2	1481.49	2043.37	919.611	0.450047	-1.15185	0.000276321	0.0088202	4	141301240	141329384	+	4674	GO:0000166;GO:0001501;GO:0001525;GO:0001568;GO:0001570;GO:0001649;GO:0001818;GO:0002043;GO:0004672;GO:0004672;GO:0004713;GO:0004713;GO:0004713;GO:0004714;GO:0004714;GO:0004714;GO:0004714;GO:0005003;GO:0005003;GO:0005005;GO:0005515;GO:0005515;GO:0005515;GO:0005524;GO:0005524;GO:0005524;GO:0005886;GO:0005886;GO:0005886;GO:0005887;GO:0005887;GO:0005887;GO:0005887;GO:0005887;GO:0005887;GO:0005925;GO:…	K05103	EC:2.7.10.1	COG0515	T	Eph receptor A2 [Source:MGI Symbol;Acc:MGI:95278]"	13836	Q03145
ENSMUSG00000037363	Letm2	34.4666	47.5235	21.4098	0.450509	-1.15037	0.0117503	0.131956	8	25578490	25597582	-	7238	GO:0003674;GO:0005739;GO:0005743;GO:0005743;GO:0016020;GO:0016021;GO:0043022;GO:0043022;GO:0016020;GO:0016021;GO:0016020;GO:0016021;	-	-	NOG243495	-	leucine zipper-EF-hand containing transmembraneprotein 2 [Source:MGI Symbol;Acc:MGI:2444979]	270035	Q7TNU7
ENSMUSG00000047638	Nr1h4	36.8039	50.7418	22.8659	0.450632	-1.14998	0.0407776	0.288674	10	89454234	89533585	-	2303	GO:0000122;GO:0000122;GO:0000122;GO:0000976;GO:0000976;GO:0000977;GO:0000977;GO:0000978;GO:0000980;GO:0000981;GO:0000981;GO:0001080;GO:0001228;GO:0001678;GO:0002376;GO:0003677;GO:0003677;GO:0003677;GO:0003677;GO:0003690;GO:0003700;GO:0003700;GO:0003700;GO:0003707;GO:0003707;GO:0004879;GO:0004879;GO:0004879;GO:0004879;GO:0005634;GO:0005634;GO:0005634;GO:0005634;GO:0005634;GO:0005719;GO:0006109;GO:…	K08537	-	NOG302915	-	nuclear receptor subfamily 1, group H, member 4[Source:MGI Symbol;Acc:MGI:1352464]	20186	Q60641
ENSMUSG00000021662	Arhgef28	21.3928	29.4742	13.3114	0.45163	-1.14679	0.0496295	0.318361	13	97899469	98206439	-	7328	GO:0005085;GO:0005089;GO:0035023;GO:0035556;GO:0005085;GO:0005085;GO:0005089;GO:0005089;GO:0035023;GO:0035023;GO:0035556;GO:0035556;GO:0046872;GO:0005085;GO:0005089;GO:0035023;GO:0035556;GO:0046872;	K21072	-	-	-	Rho guanine nucleotide exchange factor (GEF) 28[Source:MGI Symbol;Acc:MGI:1346016]	110596	P97433;G5E8P2
ENSMUSG00000021751	Acox2	23.4972	32.3615	14.6328	0.452166	-1.14507	0.0423501	0.293203	14	8225511	8259353	-	3703	GO:0003997;GO:0003997;GO:0003997;GO:0005102;GO:0005504;GO:0005504;GO:0005777;GO:0005777;GO:0005777;GO:0005777;GO:0005777;GO:0005829;GO:0006629;GO:0006631;GO:0006631;GO:0006631;GO:0006635;GO:0006635;GO:0006635;GO:0010942;GO:0010942;GO:0016491;GO:0016627;GO:0016627;GO:0033540;GO:0033540;GO:0033791;GO:0033791;GO:0033791;GO:0042803;GO:0043231;GO:0050660;GO:0050660;GO:0050660;GO:0050660;GO:0050660;GO:…	K10214	EC:1.17.99.3	COG1960	I	acyl-Coenzyme A oxidase 2, branched chain[Source:MGI Symbol;Acc:MGI:1934852]	93732	Q9QXD1
ENSMUSG00000055866	Per2	309.842	426.618	193.066	0.452551	-1.14385	6.17378e-12	2.10066e-09	1	91415982	91459324	-	5856	GO:0000122;GO:0005515;GO:0005634;GO:0005634;GO:0007623;GO:0045892;	K02633	-	NOG253593	-	period circadian clock 2 [Source:MGISymbol;Acc:MGI:1195265]	18627	O54943;Q3TW41;A0A0R4J0U3;Q8C8R0
ENSMUSG00000020889	Nr1d1	416.907	573.543	260.271	0.453795	-1.13989	0.000513259	0.0145532	11	98767932	98775333	-	3077	GO:0000122;GO:0000122;GO:0000122;GO:0000790;GO:0000790;GO:0000976;GO:0000976;GO:0000977;GO:0000977;GO:0000977;GO:0000978;GO:0000978;GO:0000981;GO:0001222;GO:0001222;GO:0001222;GO:0001227;GO:0001227;GO:0003677;GO:0003677;GO:0003677;GO:0003677;GO:0003700;GO:0003700;GO:0003700;GO:0003707;GO:0003707;GO:0005515;GO:0005634;GO:0005634;GO:0005634;GO:0005634;GO:0005634;GO:0005654;GO:0005737;GO:0005737;GO:…	K03728	-	NOG324222	-	nuclear receptor subfamily 1, group D, member 1[Source:MGI Symbol;Acc:MGI:2444210]	217166	Q3UV55
ENSMUSG00000074896	Ifit3	40.8237	56.1479	25.4994	0.454146	-1.13877	0.0256666	0.218326	19	34583531	34588731	+	1745	GO:0002376;GO:0005515;GO:0005515;GO:0005737;GO:0005737;GO:0005739;GO:0005739;GO:0005829;GO:0005829;GO:0008285;GO:0009615;GO:0009617;GO:0035457;GO:0035457;GO:0035458;GO:0035634;GO:0042802;GO:0043066;GO:0045087;GO:0051607;GO:0051607;	-	-	NOG284690	-	interferon-induced protein with tetratricopeptiderepeats 3 [Source:MGI Symbol;Acc:MGI:1101055]	15959	Q64345;Q5FW82
ENSMUSG00000035004	Igsf6	24.9821	34.3427	15.6215	0.45487	-1.13647	0.0378864	0.275653	7	121064067	121074572	-	2175	GO:0003674;GO:0005575;GO:0008150;GO:0016020;GO:0016021;	-	-	NOG25986	S	immunoglobulin superfamily, member 6 [Source:MGISymbol;Acc:MGI:1891393]	80719	P0C6B7
ENSMUSG00000034457	Eda2r	749.316	1029.52	469.111	0.455659	-1.13397	4.44768e-12	1.69351e-09	X	97333840	97377216	-	5891	GO:0005515;GO:0005886;GO:0005887;GO:0005887;GO:0007275;GO:0012501;GO:0016020;GO:0016021;GO:0030154;GO:0038023;GO:0038023;GO:0038023;GO:0038023;GO:0043123;GO:0046330;GO:0046330;GO:0046330;GO:0046330;GO:0051092;GO:0051092;GO:0051092;GO:0072332;GO:0005515;GO:0005886;GO:0005887;GO:0005887;GO:0007275;GO:0012501;GO:0016020;GO:0016021;GO:0030154;GO:0038023;GO:0038023;GO:0038023;GO:0043123;GO:0046330;GO:…	K05163	-	NOG28936	C	ectodysplasin A2 receptor [Source:MGISymbol;Acc:MGI:2442860]	245527	Q8BX35;Q3KP88
ENSMUSG00000040435	Ppp1r15a	856.48	1176.61	536.352	0.455846	-1.13338	4.13985e-22	3.89438e-19	7	45522916	45526268	-	2937	GO:0000164;GO:0000164;GO:0005737;GO:0005737;GO:0005739;GO:0005739;GO:0005741;GO:0005783;GO:0005783;GO:0005783;GO:0005789;GO:0005794;GO:0006417;GO:0006915;GO:0008157;GO:0010628;GO:0016020;GO:0016020;GO:0019888;GO:0019888;GO:0019901;GO:0019903;GO:0030968;GO:0032515;GO:0032516;GO:0032516;GO:0033138;GO:0034976;GO:0034976;GO:0034976;GO:0035308;GO:0036496;GO:0045943;GO:0060734;GO:0070262;GO:0070972;GO:…	K14019	-	NOG75356	S	protein phosphatase 1, regulatory subunit 15A[Source:MGI Symbol;Acc:MGI:1927072]	17872	P17564;B2RRL7
ENSMUSG00000062488	Ifit3b	27.47	37.6737	17.2663	0.458311	-1.1256	0.0285711	0.232166	19	34607970	34613401	+	2000	GO:0005515;GO:0005737;GO:0005739;GO:0005829;GO:0005829;GO:0035457;GO:0035457;GO:0042802;GO:0051607;	-	-	-	-	interferon-induced protein with tetratricopeptiderepeats 3B [Source:MGI Symbol;Acc:MGI:3698419]	667370	E9PV48;Q8BPC3
ENSMUSG00000046546	Fam43a	629.947	862.689	397.205	0.460427	-1.11896	0.00165655	0.0334067	16	30599723	30602797	+	3075	GO:0003674;GO:0005515;GO:0005575;GO:0008150;	-	-	NOG237605	-	family with sequence similarity 43, member A[Source:MGI Symbol;Acc:MGI:2676309]	224093	Q8BUP8
ENSMUSG00000032596	Uba7	326.68	447.28	206.08	0.460742	-1.11797	1.30203e-07	1.51986e-05	9	107975505	107984060	+	6692	GO:0004842;GO:0005634;GO:0005737;GO:0006464;GO:0006464;GO:0006464;GO:0006464;GO:0006974;GO:0008641;GO:0008641;GO:0016567;GO:0019782;GO:0019782;GO:0019782;GO:0019941;GO:0032020;GO:0032020;GO:0032020;GO:0032446;GO:0004842;GO:0005634;GO:0005737;GO:0006464;GO:0006464;GO:0006974;GO:0008641;GO:0016567;GO:0019782;GO:0019782;GO:0019941;GO:0032020;GO:0032020;GO:0032446;GO:0004842;GO:0005634;GO:0005737;GO:…	K10698	EC:6.2.1.45	-	-	ubiquitin-like modifier activating enzyme 7[Source:MGI Symbol;Acc:MGI:1349462]	74153	Q9DBK7
ENSMUSG00000025880	Smad7	540.764	740.308	341.219	0.460915	-1.11743	2.27286e-07	2.48956e-05	18	75367529	75395935	+	4521	GO:0000122;GO:0000122;GO:0001650;GO:0001650;GO:0001657;GO:0002725;GO:0003677;GO:0003700;GO:0003700;GO:0005515;GO:0005515;GO:0005515;GO:0005518;GO:0005622;GO:0005634;GO:0005634;GO:0005634;GO:0005654;GO:0005654;GO:0005654;GO:0005667;GO:0005667;GO:0005737;GO:0005737;GO:0005737;GO:0005813;GO:0005813;GO:0005829;GO:0005829;GO:0005829;GO:0005886;GO:0005886;GO:0005913;GO:0005913;GO:0006355;GO:0006355;GO:…	-	-	NOG309572	-	SMAD family member 7 [Source:MGISymbol;Acc:MGI:1100518]	-	-
ENSMUSG00000049866	Arl4c	1316.04	1799.73	832.36	0.462492	-1.1125	2.04773e-26	2.97702e-23	1	88673125	88702221	-	5492	GO:0000166;GO:0005525;GO:0005525;GO:0005525;GO:0005737;GO:0005737;GO:0005737;GO:0005829;GO:0005886;GO:0005886;GO:0005886;GO:0006886;GO:0016020;GO:0016192;GO:0030175;GO:0032456;GO:0032456;GO:0032456;GO:0042995;GO:0043014;GO:0043014;GO:0000166;GO:0005525;GO:0005525;GO:0005525;GO:0005525;GO:0005737;GO:0005737;GO:0005737;GO:0005829;GO:0005886;GO:0005886;GO:0005886;GO:0006886;GO:0016020;GO:0016192;GO:…	K07945	-	COG1100	R	ADP-ribosylation factor-like 4C [Source:MGISymbol;Acc:MGI:2445172]	320982	P61208
ENSMUSG00000037406	Htra4	24.0805	32.8991	15.2619	0.463901	-1.10811	0.0447408	0.301769	8	25024929	25038962	-	2404	GO:0004175;GO:0004175;GO:0004252;GO:0004252;GO:0005515;GO:0005520;GO:0005520;GO:0005575;GO:0005576;GO:0005576;GO:0005576;GO:0006508;GO:0006508;GO:0006508;GO:0006508;GO:0006508;GO:0008233;GO:0008236;GO:0016787;	K08786	EC:3.4.21.-	COG0265	O	HtrA serine peptidase 4 [Source:MGISymbol;Acc:MGI:3036260]	330723	A2RT60
ENSMUSG00000062991	Nrg1	511.713	698.764	324.662	0.464623	-1.10587	0.000340079	0.0104991	8	31814551	32884254	-	10576	GO:0000165;GO:0000902;GO:0003161;GO:0003712;GO:0005102;GO:0005102;GO:0005102;GO:0005176;GO:0005615;GO:0005737;GO:0005886;GO:0005887;GO:0007171;GO:0007399;GO:0007399;GO:0007399;GO:0007399;GO:0007416;GO:0007416;GO:0007422;GO:0007507;GO:0007517;GO:0007626;GO:0009897;GO:0010001;GO:0010628;GO:0016020;GO:0016021;GO:0016477;GO:0021781;GO:0021842;GO:0022011;GO:0030296;GO:0030424;GO:0030971;GO:0031594;GO:…	K05455	-	-	-	neuregulin 1 [Source:MGI Symbol;Acc:MGI:96083]"	211323	-
ENSMUSG00000032501	Trib1	929.785	1269.11	590.46	0.465256	-1.1039	1.5432e-10	3.91729e-08	15	59648350	59657099	+	6248	GO:0004672;GO:0004860;GO:0004860;GO:0004860;GO:0005524;GO:0005634;GO:0005634;GO:0005634;GO:0005737;GO:0005737;GO:0006468;GO:0006469;GO:0006469;GO:0007254;GO:0008134;GO:0008134;GO:0008134;GO:0014912;GO:0014912;GO:0031434;GO:0031434;GO:0031434;GO:0031625;GO:0031665;GO:0031665;GO:0032436;GO:0032436;GO:0032496;GO:0032496;GO:0032496;GO:0043405;GO:0043405;GO:0043405;GO:0043405;GO:0043433;GO:0043433;GO:…	K08814	-	COG0515	T	tribbles pseudokinase 1 [Source:MGISymbol;Acc:MGI:2443397]	211770	Q8K4K4
ENSMUSG00000044734	Serpinb1a	284.904	388.85	180.958	0.465368	-1.10356	0.000163307	0.005922	13	32842092	32851185	-	2303	GO:0004867;GO:0004867;GO:0004867;GO:0004867;GO:0005515;GO:0005576;GO:0005576;GO:0005615;GO:0005615;GO:0005615;GO:0005737;GO:0006954;GO:0010466;GO:0010951;GO:0010951;GO:0019725;GO:0030414;GO:0030414;GO:0042176;GO:0044342;GO:0044342;GO:0045088;GO:0050713;GO:0050713;GO:0062023;GO:0004867;GO:0004867;GO:0005615;GO:0005615;GO:0010951;	-	-	COG4826	O	serine (or cysteine) peptidase inhibitor, clade B,member 1a [Source:MGI Symbol;Acc:MGI:1913472]	66222	Q9D154
ENSMUSG00000027408	Cpxm1	43.1065	58.8169	27.396	0.465783	-1.10227	0.00712773	0.094438	2	130390775	130397574	-	2432	GO:0004181;GO:0004181;GO:0005576;GO:0005615;GO:0005615;GO:0005615;GO:0006508;GO:0006518;GO:0008270;GO:0008270;GO:0016485;GO:0016787;GO:0046872;	K08638	EC:3.4.17.-	NOG322453	-	carboxypeptidase X 1 (M14 family) [Source:MGISymbol;Acc:MGI:1934569]	56264	Q9Z100;Q3V190
ENSMUSG00000038521	C1s1	1048.03	1429.74	666.327	0.466048	-1.10145	3.65407e-05	0.00176012	6	124530345	124542359	-	3129	GO:0004252;GO:0004252;GO:0005509;GO:0005509;GO:0006508;GO:0006508;GO:0006508;GO:0006958;GO:0006958;GO:0008233;GO:0016787;GO:0004252;GO:0004252;GO:0005509;GO:0005509;GO:0006508;GO:0006508;GO:0006508;GO:0006958;GO:0006958;GO:0008233;GO:0016787;GO:0004252;GO:0004252;GO:0006508;GO:0006958;GO:0006958;	K01331	EC:3.4.21.42	-	-	complement component 1, s subcomponent 1[Source:MGI Symbol;Acc:MGI:1355312]	50908	Q8CG14;E9Q6C2;Q14DT6
ENSMUSG00000026288	Inpp5d	26.3637	35.9554	16.7719	0.466464	-1.10016	0.0376604	0.274881	1	87620312	87720507	+	7602	GO:0002376;GO:0005515;GO:0005515;GO:0005515;GO:0005737;GO:0005829;GO:0005829;GO:0005856;GO:0005884;GO:0005886;GO:0005886;GO:0006915;GO:0008340;GO:0009968;GO:0016020;GO:0016064;GO:0016787;GO:0017124;GO:0030487;GO:0030853;GO:0030863;GO:0030889;GO:0035556;GO:0043065;GO:0045121;GO:0045409;GO:0045579;GO:0045621;GO:0045648;GO:0045656;GO:0045659;GO:0045671;GO:0045779;GO:0046856;GO:0046856;GO:0050777;GO:…	K03084	EC:3.1.3.86	COG5411	T	inositol polyphosphate-5-phosphatase D [Source:MGISymbol;Acc:MGI:107357]	16331	Q9ES52
ENSMUSG00000040260	Daam2	26.2845	35.824	16.745	0.467424	-1.0972	0.0378678	0.275653	17	49456022	49564343	-	9769	GO:0003779;GO:0003779;GO:0005515;GO:0007368;GO:0016043;GO:0016043;GO:0016055;GO:0017048;GO:0017048;GO:0021516;GO:0030036;GO:0030036;GO:0048715;GO:0060828;GO:0090263;GO:2000050;GO:0003779;GO:0003779;GO:0005515;GO:0007368;GO:0016043;GO:0016043;GO:0016055;GO:0017048;GO:0017048;GO:0021516;GO:0030036;GO:0030036;GO:0048715;GO:0060828;GO:0090263;GO:2000050;	K04512	-	NOG149898	S	dishevelled associated activator of morphogenesis 2[Source:MGI Symbol;Acc:MGI:1923691]	76441	Q80U19
ENSMUSG00000044786	Zfp36	349.491	475.86	223.123	0.468883	-1.0927	4.74063e-09	8.61502e-07	7	28376784	28380253	-	3470	GO:0000122;GO:0000122;GO:0000165;GO:0000165;GO:0000288;GO:0000289;GO:0000932;GO:0000932;GO:0003677;GO:0003729;GO:0003729;GO:0003730;GO:0003730;GO:0005515;GO:0005515;GO:0005634;GO:0005634;GO:0005737;GO:0005737;GO:0005829;GO:0005829;GO:0006357;GO:0006402;GO:0006402;GO:0007275;GO:0009611;GO:0009611;GO:0010494;GO:0010494;GO:0010837;GO:0010837;GO:0019899;GO:0019901;GO:0019957;GO:0030014;GO:0031072;GO:…	K15308	-	COG5063	R	zinc finger protein 36 [Source:MGISymbol;Acc:MGI:99180]	22695	P22893;Q3U3D2
ENSMUSG00000032515	Csrnp1	248.798	338.702	158.893	0.469124	-1.09196	1.98843e-09	3.97488e-07	9	119971163	119984658	-	3473	GO:0001228;GO:0003677;GO:0003700;GO:0005634;GO:0006355;GO:0006915;GO:0009791;GO:0043565;GO:0045944;GO:0048008;GO:0048705;GO:0060021;GO:0060325;GO:0001228;GO:0003677;GO:0003700;GO:0005634;GO:0006355;GO:0006915;GO:0009791;GO:0043565;GO:0045944;GO:0048008;GO:0048705;GO:0060021;GO:0060325;GO:0001228;GO:0003677;GO:0003700;GO:0005634;GO:0006355;GO:0006915;GO:0009791;GO:0043565;GO:0045944;GO:0048008;GO:…	K17494	-	NOG150539	S	cysteine-serine-rich nuclear protein 1 [Source:MGISymbol;Acc:MGI:2387989]	215418	P59054
ENSMUSG00000042647	Acad12	30.1887	41.0798	19.2976	0.469758	-1.09001	0.0257599	0.218658	5	121596775	121618938	-	6516	GO:0005739;GO:0016491;GO:0016627;GO:0016627;GO:0050660;GO:0050660;GO:0050660;GO:0055114;GO:0055114;GO:0055114;GO:0005739;GO:0016627;GO:0016627;GO:0055114;GO:0055114;GO:0005739;GO:0016627;GO:0016627;GO:0050660;GO:0050660;GO:0055114;GO:0055114;GO:0005739;	-	-	-	-	acyl-Coenzyme A dehydrogenase family, member 12[Source:MGI Symbol;Acc:MGI:2443320]	338350	D3Z7X0
ENSMUSG00000032531	Amotl2	3027.65	4119.87	1935.42	0.469776	-1.08995	0.00878022	0.109271	9	102716672	102733418	+	6289	GO:0001525;GO:0003365;GO:0005515;GO:0005768;GO:0005923;GO:0005923;GO:0016055;GO:0016324;GO:0030036;GO:0030334;GO:0031410;GO:0031410;GO:0035329;GO:0035329;GO:0042802;GO:0055037;	K06104	-	NOG83214	S	angiomotin-like 2 [Source:MGISymbol;Acc:MGI:1929286]	56332	Q8K371
ENSMUSG00000026639	Lamb3	34.6436	47.0235	22.2637	0.47346	-1.07869	0.018623	0.178335	1	193207699	193343878	+	6612	GO:0005201;GO:0005201;GO:0005576;GO:0005576;GO:0005604;GO:0005604;GO:0005610;GO:0007155;GO:0009887;GO:0009888;GO:0016477;GO:0034446;GO:0035987;GO:0043256;GO:0044877;GO:0044877;GO:0050873;GO:0062023;GO:0070831;GO:0005201;GO:0005201;GO:0005576;GO:0005576;GO:0005604;GO:0005604;GO:0005610;GO:0007155;GO:0009887;GO:0009888;GO:0016477;GO:0034446;GO:0043256;GO:0044877;GO:0050873;GO:0062023;GO:0070831;GO:…	K06244	-	NOG289025	-	laminin, beta 3 [Source:MGI Symbol;Acc:MGI:99915]"	16780	Q61087
ENSMUSG00000021185	Dglucy	363.395	493.08	233.71	0.473981	-1.0771	5.06245e-12	1.83963e-09	12	100779057	100896981	+	4599	GO:0005739;GO:0005739;GO:0005759;GO:0006536;GO:0006536;GO:0016829;GO:0047820;GO:0047820;GO:0005739;GO:0005739;GO:0005759;GO:0006536;GO:0006536;GO:0016829;GO:0047820;GO:0047820;GO:0005739;GO:0005739;GO:0005759;GO:0006536;GO:0006536;GO:0016829;GO:0047820;GO:0047820;GO:0005739;GO:0005739;GO:0005759;GO:0006536;GO:0006536;GO:0016829;GO:0047820;GO:0047820;	K22210	EC:4.2.1.48	COG4336	S	D-glutamate cyclase [Source:MGISymbol;Acc:MGI:2444813]	217830	Q8BH86
ENSMUSG00000004151	Etv1	172.213	233.629	110.797	0.474244	-1.0763	0.00392262	0.0634283	12	38779380	38870484	+	13296	GO:0003677;GO:0003700;GO:0003700;GO:0005634;GO:0005634;GO:0005634;GO:0006355;GO:0006355;GO:0006366;GO:0006366;GO:0043565;GO:0043565;GO:0048935;GO:0048935;GO:0000978;GO:0000978;GO:0000981;GO:0001228;GO:0001228;GO:0003677;GO:0003700;GO:0003700;GO:0003700;GO:0005634;GO:0005634;GO:0005634;GO:0005634;GO:0006355;GO:0006355;GO:0006357;GO:0006366;GO:0006366;GO:0007411;GO:0007517;GO:0007638;GO:0030154;GO:…	K09431	-	NOG258471	-	ets variant 1 [Source:MGI Symbol;Acc:MGI:99254]"	14009	P41164;Q8CCR6;Q549J8
ENSMUSG00000026222	Sp100	182.831	247.693	117.969	0.476273	-1.07014	1.95603e-06	0.000149669	1	85649988	85709998	+	7556	GO:0000723;GO:0003677;GO:0003677;GO:0003677;GO:0005515;GO:0005634;GO:0005634;GO:0005634;GO:0005634;GO:0005737;GO:0010596;GO:0016605;GO:0016605;GO:0030870;GO:0045765;GO:0046826;GO:1902041;GO:1902044;GO:0005634;GO:0005634;GO:0005634;GO:0000723;GO:0003677;GO:0003677;GO:0003677;GO:0005515;GO:0005634;GO:0005634;GO:0005634;GO:0005634;GO:0005737;GO:0010596;GO:0016605;GO:0016605;GO:0030870;GO:0045765;GO:…	K15413	-	NOG289710	-	nuclear antigen Sp100 [Source:MGISymbol;Acc:MGI:109561]	20684	O35892;Q8BNW8
ENSMUSG00000032593	Amigo3	129.242	175.082	83.4014	0.476356	-1.06989	1.04339e-05	0.000620292	9	108053159	108055701	+	2543	GO:0003674;GO:0005515;GO:0007155;GO:0007155;GO:0007157;GO:0007157;GO:0007399;GO:0007420;GO:0010977;GO:0016020;GO:0016021;GO:0016021;GO:0016021;GO:0044877;GO:0051965;	K22529	-	NOG146733	R	adhesion molecule with Ig like domain 3 [Source:MGISymbol;Acc:MGI:2444854]	320844	Q8C2S7
ENSMUSG00000036334	Igsf10	110.6	149.77	71.4291	0.476925	-1.06817	3.79669e-05	0.00182333	3	59316735	59344394	-	10150	GO:0001503;GO:0003674;GO:0005515;GO:0005576;GO:0005576;GO:0005576;GO:0005576;GO:0042246;GO:2001222;GO:0001503;GO:0003674;GO:0005515;GO:0005576;GO:0005576;GO:0005576;GO:0042246;GO:2001222;GO:0001503;GO:0003674;GO:0005515;GO:0005576;GO:0005576;GO:0005576;GO:0042246;GO:2001222;	-	-	NOG239806	-	immunoglobulin superfamily, member 10 [Source:MGISymbol;Acc:MGI:1923481]	242050	Q3V1M1
ENSMUSG00000052684	Jun	2145.49	2900.88	1390.09	0.479194	-1.06132	6.90524e-25	9.20239e-22	4	95049034	95052222	-	3189	GO:0000122;GO:0000790;GO:0000790;GO:0000790;GO:0000976;GO:0000976;GO:0000976;GO:0000978;GO:0000980;GO:0000980;GO:0000981;GO:0000981;GO:0000981;GO:0001102;GO:0001102;GO:0001228;GO:0001228;GO:0001228;GO:0001525;GO:0001525;GO:0001774;GO:0001836;GO:0001836;GO:0001889;GO:0001938;GO:0003151;GO:0003677;GO:0003677;GO:0003677;GO:0003677;GO:0003682;GO:0003690;GO:0003690;GO:0003700;GO:0003700;GO:0003700;GO:…	K04448	-	NOG283376	-	jun proto-oncogene [Source:MGISymbol;Acc:MGI:96646]	16476	P05627;Q52L79
ENSMUSG00000070034	Sp110	48.9193	66.1104	31.7281	0.479927	-1.05911	0.00524655	0.0766235	1	85576899	85598817	-	6781	GO:0002376;GO:0003677;GO:0003677;GO:0003677;GO:0005634;GO:0005634;GO:0005634;GO:0005634;GO:0006915;GO:0009617;GO:0043065;GO:0045087;	-	-	NOG306672	-	Sp110 nuclear body protein [Source:MGISymbol;Acc:MGI:1923364]	109032	Q8BVK9
ENSMUSG00000040287	Stac3	26.5076	35.7489	17.2663	0.482988	-1.04994	0.044918	0.302582	10	127501686	127508823	+	2543	GO:0003009;GO:0003009;GO:0003009;GO:0005515;GO:0005654;GO:0005737;GO:0005829;GO:0005829;GO:0005886;GO:0005891;GO:0007274;GO:0007274;GO:0016020;GO:0030315;GO:0031234;GO:0031234;GO:0035556;GO:0035556;GO:0042383;GO:0042802;GO:0046872;GO:0048741;GO:1901387;GO:1901387;GO:1903078;GO:1903078;GO:0003009;GO:0003009;GO:0003009;GO:0003009;GO:0005515;GO:0005654;GO:0005654;GO:0005737;GO:0005829;GO:0005829;GO:…	-	-	NOG81499	P	SH3 and cysteine rich domain 3 [Source:MGISymbol;Acc:MGI:3606571]	237611	Q8BZ71
ENSMUSG00000029838	Ptn	176.39	237.866	114.914	0.483103	-1.0496	0.0155775	0.15831	6	36714929	36810220	-	3433	GO:0001503;GO:0001889;GO:0002232;GO:0002690;GO:0004864;GO:0004864;GO:0004864;GO:0005178;GO:0005178;GO:0005539;GO:0005539;GO:0005576;GO:0005576;GO:0005576;GO:0005576;GO:0005604;GO:0005604;GO:0005615;GO:0005615;GO:0005615;GO:0005737;GO:0005737;GO:0005783;GO:0005783;GO:0005886;GO:0007229;GO:0007229;GO:0007229;GO:0007406;GO:0007420;GO:0007507;GO:0007612;GO:0007612;GO:0007612;GO:0007613;GO:0008083;GO:…	K16642	-	NOG262747	-	pleiotrophin [Source:MGI Symbol;Acc:MGI:97804]"	19242	P63089
ENSMUSG00000024912	Fosl1	236.338	318.341	154.336	0.484815	-1.0445	1.92061e-08	2.89759e-06	19	5447547	5455946	+	2033	GO:0000977;GO:0000978;GO:0000978;GO:0000978;GO:0000978;GO:0001228;GO:0001228;GO:0001701;GO:0003677;GO:0003677;GO:0003677;GO:0003677;GO:0003677;GO:0003700;GO:0003700;GO:0005634;GO:0005634;GO:0005634;GO:0005634;GO:0005634;GO:0005634;GO:0005654;GO:0005654;GO:0005829;GO:0005829;GO:0006355;GO:0006355;GO:0006357;GO:0006357;GO:0007296;GO:0007565;GO:0007612;GO:0008285;GO:0008285;GO:0009612;GO:0009629;GO:…	K04502	-	NOG252534	-	fos-like antigen 1 [Source:MGISymbol;Acc:MGI:107179]	14283	P48755;Q3UMK5
ENSMUSG00000069601	Ank3	111.006	149.514	72.4987	0.484895	-1.04426	5.52028e-05	0.00246593	10	69398773	70027438	+	34838	GO:0005515;GO:0007165;GO:0007165;GO:0000281;GO:0005200;GO:0005515;GO:0005515;GO:0005737;GO:0005764;GO:0005856;GO:0005886;GO:0005886;GO:0005886;GO:0005923;GO:0007009;GO:0007010;GO:0007165;GO:0007165;GO:0007409;GO:0007411;GO:0007528;GO:0008092;GO:0008092;GO:0009925;GO:0009986;GO:0009986;GO:0010628;GO:0010628;GO:0010650;GO:0010650;GO:0010765;GO:0010765;GO:0010960;GO:0014704;GO:0014731;GO:0014731;GO:…	K10380	-	-	-	ankyrin 3, epithelial [Source:MGISymbol;Acc:MGI:88026]	11735	G5E8K5
ENSMUSG00000063972	Nr6a1	179.997	242.392	117.601	0.48517	-1.04344	5.20413e-07	4.86693e-05	2	38723370	38927688	-	10824	GO:0000122;GO:0000978;GO:0000978;GO:0001228;GO:0003677;GO:0003677;GO:0003677;GO:0003677;GO:0003700;GO:0003700;GO:0003707;GO:0003707;GO:0004879;GO:0005515;GO:0005515;GO:0005634;GO:0005634;GO:0005634;GO:0005634;GO:0005667;GO:0005667;GO:0006355;GO:0006355;GO:0007275;GO:0007276;GO:0007283;GO:0008270;GO:0008270;GO:0030154;GO:0030522;GO:0042803;GO:0043401;GO:0043565;GO:0043565;GO:0043565;GO:0045944;GO:…	K08561	-	NOG253308	-	nuclear receptor subfamily 6, group A, member 1[Source:MGI Symbol;Acc:MGI:1352459]	14536	Q64249
ENSMUSG00000029298	Gbp9	211.564	284.683	138.444	0.48631	-1.04005	0.039266	0.281388	5	105077630	105139539	-	5173	GO:0000166;GO:0003924;GO:0003924;GO:0003924;GO:0005525;GO:0005525;GO:0005525;GO:0005525;GO:0020005;GO:0020005;GO:0031410;GO:0031410;GO:0042832;GO:0042832;GO:0044406;GO:0050830;GO:0050830;GO:0071346;GO:0071346;GO:0000166;GO:0003924;GO:0003924;GO:0003924;GO:0005525;GO:0005525;GO:0005525;GO:0005525;GO:0020005;GO:0020005;GO:0031410;GO:0031410;GO:0042832;GO:0042832;GO:0044406;GO:0050830;GO:0050830;GO:…	K20908	-	-	-	guanylate-binding protein 9 [Source:MGISymbol;Acc:MGI:3605620]	236573	Q8BTS3
ENSMUSG00000039910	Cited2	5261.73	7078.16	3445.3	0.48675	-1.03875	2.81523e-06	0.000208431	10	17723218	17725674	+	2457	GO:0000122;GO:0000790;GO:0001102;GO:0001102;GO:0001568;GO:0001570;GO:0001666;GO:0001666;GO:0001701;GO:0001829;GO:0001841;GO:0001843;GO:0001889;GO:0001889;GO:0001892;GO:0001944;GO:0001947;GO:0002089;GO:0002244;GO:0002521;GO:0003151;GO:0003151;GO:0003156;GO:0003197;GO:0003281;GO:0003682;GO:0003682;GO:0003700;GO:0003712;GO:0003713;GO:0003713;GO:0003713;GO:0003713;GO:0003714;GO:0003714;GO:0005515;GO:…	K21361	-	NOG44915	-	Cbp/p300-interacting transactivator, with Glu/Asp-rich carboxy-terminal domain, 2 [Source:MGISymbol;Acc:MGI:1306784]	17684	O35740
ENSMUSG00000021775	Nr1d2	1452.65	1952.85	952.459	0.487728	-1.03585	1.43851e-08	2.23347e-06	14	18204054	18239127	-	5409	GO:0000122;GO:0000122;GO:0000976;GO:0000977;GO:0000978;GO:0000978;GO:0000980;GO:0000981;GO:0000987;GO:0001227;GO:0003677;GO:0003677;GO:0003677;GO:0003677;GO:0003700;GO:0003700;GO:0003700;GO:0003707;GO:0003707;GO:0004879;GO:0004879;GO:0005515;GO:0005515;GO:0005634;GO:0005634;GO:0005634;GO:0005634;GO:0005634;GO:0005634;GO:0005654;GO:0005654;GO:0005737;GO:0006355;GO:0006355;GO:0006355;GO:0007275;GO:…	K08531	-	NOG324222	-	nuclear receptor subfamily 1, group D, member 2[Source:MGI Symbol;Acc:MGI:2449205]	353187	Q60674;Q4VAB7;Q8C6J1;Q8C598
ENSMUSG00000024339	Tap2	269.464	361.744	177.184	0.489803	-1.02973	6.00918e-06	0.000390645	17	34203527	34216321	+	3781	GO:0000166;GO:0000166;GO:0001916;GO:0002237;GO:0002250;GO:0002376;GO:0002481;GO:0002485;GO:0002489;GO:0002591;GO:0005515;GO:0005524;GO:0005524;GO:0005524;GO:0005524;GO:0005783;GO:0005783;GO:0005783;GO:0005789;GO:0015031;GO:0015433;GO:0015440;GO:0015440;GO:0015440;GO:0015833;GO:0015833;GO:0015833;GO:0015833;GO:0015833;GO:0016020;GO:0016020;GO:0016020;GO:0016021;GO:0016021;GO:0016021;GO:0016021;GO:…	K05654	-	COG1132	V	transporter 2, ATP-binding cassette, sub-family B(MDR/TAP) [Source:MGI Symbol;Acc:MGI:98484]	21355	P36371;Q792S7
ENSMUSG00000003541	Ier3	3067.33	4117.61	2017.05	0.489859	-1.02956	8.28099e-31	1.47144e-27	17	35821684	35822923	+	1131	GO:0005634;GO:0043066;GO:0043066;GO:2001020;	-	-	-	-	immediate early response 3 [Source:MGISymbol;Acc:MGI:104814]	15937	Q91VZ5
ENSMUSG00000000958	Slc7a7	39.3931	52.8733	25.9129	0.490094	-1.02887	0.0158043	0.159559	14	54369442	54417780	-	3315	GO:0000821;GO:0000821;GO:0005886;GO:0006865;GO:0015174;GO:0015174;GO:0015179;GO:0016020;GO:0016020;GO:0016020;GO:0016021;GO:0016323;GO:0022857;GO:0022857;GO:0055085;GO:0055085;GO:1902475;GO:1990822;GO:0000821;GO:0000821;GO:0005886;GO:0006865;GO:0015174;GO:0015174;GO:0015179;GO:0016020;GO:0016020;GO:0016020;GO:0016021;GO:0016323;GO:0022857;GO:0022857;GO:0055085;GO:0055085;GO:1902475;GO:1990822;GO:…	K13867	-	COG0531	E	solute carrier family 7 (cationic amino acidtransporter, y+ system), member 7 [Source:MGISymbol;Acc:MGI:1337120]	20540	Q9Z1K8
ENSMUSG00000024778	Fas	389.563	521.984	257.142	0.492623	-1.02144	0.00271292	0.048857	19	34290666	34327772	+	2062	GO:0001934;GO:0002020;GO:0002377;GO:0004888;GO:0004888;GO:0005031;GO:0005515;GO:0005515;GO:0005515;GO:0005515;GO:0005516;GO:0005516;GO:0005576;GO:0005615;GO:0005737;GO:0005829;GO:0005886;GO:0005886;GO:0006915;GO:0006915;GO:0006915;GO:0006915;GO:0006924;GO:0006925;GO:0006955;GO:0006955;GO:0007165;GO:0007165;GO:0007623;GO:0008625;GO:0008625;GO:0009636;GO:0009897;GO:0009986;GO:0010467;GO:0010468;GO:…	K04390	-	NOG45364	S	Fas (TNF receptor superfamily member 6) [Source:MGISymbol;Acc:MGI:95484]	14102	P25446
ENSMUSG00000103034	Gm8797	28.1952	37.7489	18.6415	0.493831	-1.01791	0.0472066	0.310542	3	5750806	5751295	+	490	GO:0005515;	-	-	-	-	predicted pseudogene 8797 [Source:MGISymbol;Acc:MGI:3643769]	-	-
ENSMUSG00000035356	Nfkbiz	1468.43	1965.72	971.143	0.494039	-1.0173	3.36248e-08	4.8444e-06	16	55811375	55838899	-	5018	GO:0005515;GO:0005515;GO:0005634;GO:0005634;GO:0005634;GO:0006954;GO:0016607;GO:0036464;GO:0050729;GO:0050852;GO:2000321;GO:0005515;GO:0005515;GO:0005634;GO:0005634;GO:0005634;GO:0006954;GO:0016607;GO:0016607;GO:0036464;GO:0036464;GO:0050729;GO:0050729;GO:0050852;GO:2000321;GO:0005515;GO:0005515;GO:0005634;GO:0005634;GO:0005634;GO:0006954;GO:0016607;GO:0036464;GO:0050729;GO:0050852;GO:2000321;GO:…	K14242	-	NOG283039	-	nuclear factor of kappa light polypeptide geneenhancer in B cells inhibitor, zeta [Source:MGISymbol;Acc:MGI:1931595]	80859	Q9EST8
ENSMUSG00000042333	Tnfrsf14	62.2881	83.3475	41.2287	0.49466	-1.01549	0.0027519	0.0493368	4	154921933	154928563	-	1438	GO:0005515;GO:0016020;GO:0016021;GO:0001618;GO:0002250;GO:0002376;GO:0002741;GO:0002741;GO:0005515;GO:0005515;GO:0005886;GO:0005886;GO:0005886;GO:0009897;GO:0009897;GO:0016020;GO:0016021;GO:0016032;GO:0019955;GO:0031295;GO:0031625;GO:0045087;GO:0046642;GO:0046642;GO:0046718;GO:0050731;GO:0050731;GO:0050829;GO:0050829;GO:0050830;GO:0050830;GO:1905675;GO:2000406;GO:2000406;GO:0005515;GO:0016020;GO:…	K05152	-	-	-	tumor necrosis factor receptor superfamily, member14 (herpesvirus entry mediator) [Source:MGISymbol;Acc:MGI:2675303]	230979	Q80WM9
ENSMUSG00000017737	Mmp9	47.857	63.986	31.7281	0.495861	-1.01199	0.0373708	0.273969	2	164940780	164955850	+	3539	GO:0001501;GO:0001934;GO:0001934;GO:0001968;GO:0002687;GO:0004175;GO:0004175;GO:0004222;GO:0004222;GO:0004222;GO:0004222;GO:0004222;GO:0004222;GO:0004252;GO:0005576;GO:0005615;GO:0005615;GO:0005615;GO:0005615;GO:0006508;GO:0006508;GO:0006508;GO:0006508;GO:0006508;GO:0006979;GO:0007507;GO:0007566;GO:0007568;GO:0008233;GO:0008233;GO:0008237;GO:0008237;GO:0008237;GO:0008237;GO:0008237;GO:0008237;GO:…	K01403	EC:3.4.24.35	NOG328372	-	matrix metallopeptidase 9 [Source:MGISymbol;Acc:MGI:97011]	17395	P41245
ENSMUSG00000015709	Arnt2	75.6064	101.059	50.1541	0.496286	-1.01076	0.0335848	0.25772	7	84246278	84410176	-	7689	GO:0000978;GO:0000981;GO:0000981;GO:0001228;GO:0001666;GO:0001666;GO:0001666;GO:0001666;GO:0001701;GO:0003677;GO:0003677;GO:0003700;GO:0003700;GO:0003700;GO:0005515;GO:0005634;GO:0005634;GO:0005634;GO:0005634;GO:0005634;GO:0005634;GO:0005667;GO:0005667;GO:0005667;GO:0005737;GO:0005737;GO:0006355;GO:0006355;GO:0006355;GO:0006355;GO:0007165;GO:0007417;GO:0007420;GO:0007420;GO:0007420;GO:0008284;GO:…	K15589	-	NOG293303	-	aryl hydrocarbon receptor nuclear translocator 2[Source:MGI Symbol;Acc:MGI:107188]	11864	Q61324
ENSMUSG00000026819	Slc25a25	379.53	506.465	252.595	0.498742	-1.00364	2.1569e-06	0.000163475	2	32414487	32451445	-	7862	GO:0002021;GO:0005347;GO:0005509;GO:0005509;GO:0005739;GO:0005739;GO:0005743;GO:0005743;GO:0005743;GO:0014823;GO:0015867;GO:0016020;GO:0016021;GO:0022857;GO:0022857;GO:0032094;GO:0035264;GO:0043010;GO:0045333;GO:0046034;GO:0046872;GO:0055085;GO:0055085;GO:0060612;GO:0070588;GO:0002021;GO:0005347;GO:0005509;GO:0005509;GO:0005739;GO:0005739;GO:0005743;GO:0005743;GO:0005743;GO:0014823;GO:0015867;GO:…	K14684	-	COG5126	DTZ	solute carrier family 25 (mitochondrial carrier,phosphate carrier), member 25 [Source:MGISymbol;Acc:MGI:1915913]	227731	A2ASZ8
ENSMUSG00000000411	Tssk3	4.9155	9.83099	0	0	-Inf	0.00281535	0.0497492	4	129489014	129491022	-	1280	GO:0000166;GO:0000287;GO:0004672;GO:0004672;GO:0004674;GO:0004674;GO:0005524;GO:0005524;GO:0005524;GO:0005634;GO:0005737;GO:0006468;GO:0006468;GO:0006468;GO:0006468;GO:0007275;GO:0007283;GO:0016301;GO:0016310;GO:0016740;GO:0030154;GO:0035556;GO:0035556;GO:0046872;GO:0048240;	K08811	EC:2.7.11.1	COG0515	T	testis-specific serine kinase 3 [Source:MGISymbol;Acc:MGI:1929914]	58864	Q9D2E1
ENSMUSG00000007944	Ttc9b	4.62794	9.25588	0	0	-Inf	0.00394652	0.0635576	7	27653915	27657346	+	2052	GO:0003674;GO:0005515;GO:0005575;GO:0008150;	-	-	NOG74457	-	tetratricopeptide repeat domain 9B [Source:MGISymbol;Acc:MGI:1920282]	73032	Q9D6E4
ENSMUSG00000026592	Tex35	2.96244	5.92489	0	0	-Inf	0.0343762	0.260666	1	157099139	157108680	-	1093	GO:0015630;GO:0016020;GO:0016021;	-	-	NOG39358	-	testis expressed 35 [Source:MGISymbol;Acc:MGI:1920685]	73435	Q14BK3;A0A0R4J070
ENSMUSG00000073774	Kncn	2.95305	5.90611	0	0	-Inf	0.0345586	0.261308	4	115884400	115889526	+	2521	GO:0003674;GO:0005737;GO:0005737;GO:0008150;GO:0015630;GO:0016020;GO:0016021;GO:0016324;GO:0016324;GO:0032437;GO:0032437;GO:0036064;GO:0036064;GO:0043025;GO:0043025;GO:0045177;GO:0045177;GO:0060091;GO:0060091;	-	-	NOG127545	S	kinocilin [Source:MGI Symbol;Acc:MGI:3614952]"	654462	Q307W7
ENSMUSG00000087444	Gm5475	2.69366	5.38733	0	0	-Inf	0.0476511	0.311871	15	100422147	100428150	+	3366	GO:0003674;GO:0005575;GO:0008150;GO:0003674;GO:0005575;GO:0008150;	-	-	-	-	predicted gene 5475 [Source:MGISymbol;Acc:MGI:3646320]	432982	-

## Sheet: Up
Ensemble_ID	Name	baseMean	baseMeanA	baseMeanB	foldChange	log2FoldChange	pval	padj	Chromosome	Start Site	End Site	Direction	Length	GO	KEGG	EC	eggNOG Class	eggNOG	Description	NCBI_GI	UniProtID
ENSMUSG00000032532	Cck	4.0357	0	8.0714	Inf	Inf	0.00780011	0.101085	9	121489824	121495694	-	1305	GO:0016020;GO:0016021;GO:0005179;GO:0005179;GO:0005576;GO:0005576;GO:0007165;GO:0001764;GO:0001836;GO:0005179;GO:0005179;GO:0005179;GO:0005179;GO:0005179;GO:0005184;GO:0005184;GO:0005515;GO:0005576;GO:0005576;GO:0005576;GO:0005615;GO:0005615;GO:0006915;GO:0006919;GO:0007205;GO:0007409;GO:0007586;GO:0007613;GO:0008284;GO:0008542;GO:0014049;GO:0030424;GO:0030424;GO:0030425;GO:0032099;GO:0032461;GO:…	K05226	-	NOG40485	S	cholecystokinin [Source:MGI Symbol;Acc:MGI:88297]"	12424	P09240
ENSMUSG00000074847	Gm10775	2.81329	0	5.62658	Inf	Inf	0.0394731	0.282567	13	65259539	65260826	+	1203	GO:0003674;GO:0005575;GO:0008150;	-	-	-	-	predicted gene 10775 [Source:MGISymbol;Acc:MGI:3642324]	-	-
ENSMUSG00000037953	A4gnt	4.35308	0.5	8.20616	16.4123	4.03671	0.0246682	0.213002	9	99612502	99622367	+	2757	GO:0000139;GO:0005575;GO:0005794;GO:0006486;GO:0006493;GO:0008375;GO:0008375;GO:0009101;GO:0009101;GO:0016020;GO:0016021;GO:0016740;GO:0016757;GO:0050680;	K08251	EC:2.4.1.-	NOG251623	-	alpha-1,4-N-acetylglucosaminyltransferase[Source:MGI Symbol;Acc:MGI:2143261]	333424	Q14BT6
ENSMUSG00000032405	Pias1	4687.57	821.956	8553.18	10.4059	3.37933	8.85014e-267	1.41531e-262	9	62878368	62987924	-	6830	GO:0000082;GO:0000082;GO:0000122;GO:0003677;GO:0003714;GO:0005515;GO:0005515;GO:0005515;GO:0005515;GO:0005634;GO:0005634;GO:0005634;GO:0005634;GO:0005654;GO:0007259;GO:0007283;GO:0008022;GO:0008022;GO:0008134;GO:0008270;GO:0008270;GO:0008542;GO:0008542;GO:0016605;GO:0016607;GO:0016740;GO:0016925;GO:0016925;GO:0016925;GO:0019789;GO:0019899;GO:0019899;GO:0019904;GO:0019904;GO:0031625;GO:0032436;GO:…	K04706	EC:2.3.2.-	NOG125513	S	protein inhibitor of activated STAT 1 [Source:MGISymbol;Acc:MGI:1913125]	56469	O88907;Q2M4G9
ENSMUSG00000023906	Cldn6	9.37409	2.44366	16.3045	6.67216	2.73815	0.00644726	0.0883979	17	23679249	23682446	+	1721	GO:0001618;GO:0001618;GO:0005198;GO:0005198;GO:0005515;GO:0005886;GO:0005886;GO:0005886;GO:0005923;GO:0005923;GO:0005923;GO:0005923;GO:0016020;GO:0016021;GO:0016021;GO:0016021;GO:0016327;GO:0016338;GO:0030054;GO:0042802;GO:0045216;GO:0046718;GO:0001618;GO:0005198;GO:0005198;GO:0005515;GO:0005886;GO:0005886;GO:0005923;GO:0005923;GO:0005923;GO:0005923;GO:0016020;GO:0016021;GO:0016021;GO:0016021;GO:…	K06087	-	NOG45113	S	claudin 6 [Source:MGI Symbol;Acc:MGI:1859284]"	54419	Q9Z262;Q0GH64
ENSMUSG00000094651	Gal3st2	6.80516	1.94366	11.6667	6.0024	2.58554	0.0300349	0.23947	1	93861306	93876494	+	3063	GO:0001733;GO:0001733;GO:0005794;GO:0005794;GO:0009247;GO:0009247;GO:0016020;GO:0016021;GO:0016021;GO:0016021;GO:0016740;GO:0001733;GO:0001733;GO:0005794;GO:0005794;GO:0009247;GO:0009247;GO:0016021;GO:0016021;	K09675	EC:2.8.2.-	NOG26344	T	galactose-3-O-sulfotransferase 2 [Source:MGISymbol;Acc:MGI:2685834]	381334	A2RTS9;Q3UN22
ENSMUSG00000052516	Robo2	6.50816	1.92489	11.0914	5.76213	2.5266	0.0380305	0.276196	16	73891839	74411825	-	16983	GO:0001657;GO:0005515;GO:0007156;GO:0007411;GO:0007420;GO:0007420;GO:0008046;GO:0009986;GO:0016020;GO:0016021;GO:0021510;GO:0032870;GO:0042802;GO:0050772;GO:0050925;GO:0061364;GO:0005515;GO:0016020;GO:0016021;GO:0005515;GO:0016020;GO:0016021;GO:0005515;GO:0016020;GO:0016021;GO:0005515;GO:0016020;GO:0016021;	K06754	-	-	-	roundabout guidance receptor 2 [Source:MGISymbol;Acc:MGI:1890110]	268902	-
ENSMUSG00000025189	Cnnm1	8.57617	2.90611	14.2462	4.90217	2.29342	0.0254413	0.217264	19	43440436	43497210	+	5717	GO:0016020;GO:0016021;GO:0005886;GO:0005886;GO:0005886;GO:0006811;GO:0016020;GO:0016021;GO:0022857;GO:0030425;GO:0043025;GO:0055085;	K16302	-	COG1253	P	cyclin M1 [Source:MGI Symbol;Acc:MGI:1891366]"	83674	Q0GA42
ENSMUSG00000051716	Apon	7.0915	2.46244	11.7206	4.75973	2.25088	0.0471112	0.31037	10	128254096	128255896	+	1801	GO:0003674;GO:0005615;GO:0005737;GO:0008150;GO:0003674;GO:0005615;GO:0005737;GO:0008150;	-	-	-	-	apolipoprotein N [Source:MGI Symbol;Acc:MGI:88931]"	28194	G3X9D6
ENSMUSG00000008482	Rnf151	7.0376	2.46244	11.6128	4.71595	2.23755	0.0476475	0.311871	17	24715839	24718063	-	1195	GO:0005515;GO:0005634;GO:0005634;GO:0005737;GO:0007283;GO:0008270;GO:0008270;GO:0030154;GO:0046872;GO:0005515;GO:0008270;	-	-	NOG319521	-	ring finger protein 151 [Source:MGISymbol;Acc:MGI:1914754]	67504	Q9CQ29
ENSMUSG00000037944	Ccr7	8.32082	2.94366	13.698	4.65338	2.21828	0.0313039	0.245639	11	99144196	99155077	-	1978	GO:0001768;GO:0002408;GO:0002408;GO:0002518;GO:0002606;GO:0002649;GO:0002885;GO:0002922;GO:0004930;GO:0004930;GO:0004930;GO:0004930;GO:0004950;GO:0004950;GO:0005515;GO:0005739;GO:0005739;GO:0005886;GO:0005886;GO:0005886;GO:0005886;GO:0006935;GO:0006935;GO:0006935;GO:0006935;GO:0006954;GO:0006954;GO:0006954;GO:0006955;GO:0006955;GO:0006955;GO:0006955;GO:0007165;GO:0007186;GO:0007186;GO:0007186;GO:…	K04182	-	NOG149643	S	chemokine (C-C motif) receptor 7 [Source:MGISymbol;Acc:MGI:103011]	12775	P47774
ENSMUSG00000039084	Chad	33.8507	12.7747	54.9267	4.29966	2.10422	1.44385e-05	0.00082171	11	94565047	94569127	+	1680	GO:0005515;GO:0005576;GO:0005615;GO:0031012;GO:0060348;GO:1900155;	K06248	-	COG4886	S	chondroadherin [Source:MGI Symbol;Acc:MGI:1096866]"	12643	O55226;Q3TYW1
ENSMUSG00000046516	Cox17	52.1097	20.162	84.0575	4.16911	2.05974	1.17085e-07	1.37678e-05	16	38346991	38352763	+	5773	GO:0005507;GO:0005507;GO:0005507;GO:0005737;GO:0005737;GO:0005739;GO:0005739;GO:0005758;GO:0005758;GO:0005758;GO:0005758;GO:0005758;GO:0006825;GO:0006825;GO:0008047;GO:0008284;GO:0016531;GO:0016531;GO:0016531;GO:0016531;GO:0016531;GO:0033617;GO:0033617;GO:0046872;GO:1903136;GO:1904960;GO:0005507;GO:0005507;GO:0005507;GO:0005737;GO:0005737;GO:0005739;GO:0005739;GO:0005758;GO:0005758;GO:0005758;GO:…	K02260	-	NOG136703	S	cytochrome c oxidase assembly protein 17, copperchaperone [Source:MGI Symbol;Acc:MGI:1333806]	12856	P56394;Q54AC6
ENSMUSG00000047787	Flrt1	9.98812	3.88733	16.0889	4.13881	2.04922	0.0373812	0.273969	19	7092001	7105729	-	5872	GO:0005104;GO:0005515;GO:0005576;GO:0005615;GO:0005737;GO:0005783;GO:0005789;GO:0005886;GO:0005887;GO:0005911;GO:0005925;GO:0007155;GO:0007275;GO:0008543;GO:0016020;GO:0016021;GO:0016358;GO:0030054;GO:0030659;GO:0031410;GO:0032809;GO:0042995;GO:0044306;GO:0048471;GO:0051965;GO:1990138;	K16362	-	-	-	fibronectin leucine rich transmembrane protein 1[Source:MGI Symbol;Acc:MGI:3026647]	396184	Q6RKD8
ENSMUSG00000031145	Prickle3	9.79197	3.96244	15.6215	3.94239	1.97907	0.0307303	0.242566	X	7657260	7668186	+	4902	GO:0005634;GO:0005634;GO:0005737;GO:0005813;GO:0005813;GO:0005886;GO:0007275;GO:0008150;GO:0008270;GO:0008270;GO:0016020;GO:0030030;GO:0046872;GO:0008270;GO:0008270;GO:0046872;	K04511	-	NOG314122	-	prickle planar cell polarity protein 3 [Source:MGISymbol;Acc:MGI:1859635]	54630	Q80VL3;Q8BNH2
ENSMUSG00000039763	Dnajc28	24.5574	10.331	38.7839	3.75413	1.90848	0.000740545	0.018888	16	91614254	91619026	-	3565	GO:0003674;GO:0006890;GO:0007030;GO:0017119;GO:0048213;	K19373	-	NOG235483	-	DnaJ heat shock protein family (Hsp40) member C28[Source:MGI Symbol;Acc:MGI:2181053]	246738	Q8VCE1;Q8C4S9
ENSMUSG00000026564	Dusp27	74.6296	31.9366	117.323	3.6736	1.8772	6.67811e-09	1.1482e-06	1	166098148	166127922	-	4049	GO:0005575;GO:0005737;GO:0006470;GO:0006470;GO:0008138;GO:0008138;GO:0016311;GO:0016311;GO:0016791;GO:0016791;GO:0030017;GO:0005575;GO:0005737;GO:0006470;GO:0006470;GO:0008138;GO:0008138;GO:0016311;GO:0016311;GO:0016791;GO:0016791;GO:0030017;	K14165	-	COG2453	T	dual specificity phosphatase 27 (putative)[Source:MGI Symbol;Acc:MGI:2685055]	240892	Q148W8
ENSMUSG00000036381	P2ry14	16.9831	7.77466	26.1916	3.36885	1.75226	0.0237892	0.209261	3	59113855	59153618	-	11059	GO:0004930;GO:0004930;GO:0007186;GO:0007186;GO:0016020;GO:0016021;GO:0016021;GO:0016021;GO:0035589;GO:0045028;GO:0045028;GO:0004930;GO:0004930;GO:0004930;GO:0005886;GO:0006955;GO:0007165;GO:0007186;GO:0007186;GO:0007186;GO:0007186;GO:0016020;GO:0016021;GO:0016021;GO:0016021;GO:0035589;GO:0045028;GO:0045028;GO:0045028;GO:0004930;GO:0004930;GO:0004930;GO:0005886;GO:0006955;GO:0007165;GO:0007186;GO:…	-	-	NOG149084	S	purinergic receptor P2Y, G-protein coupled, 14[Source:MGI Symbol;Acc:MGI:2155705]	320463	-
ENSMUSG00000041827	Oasl1	18.0245	8.29344	27.7556	3.34669	1.74274	0.00789578	0.101748	5	114923240	114937915	+	2608	GO:0002376;GO:0003677;GO:0003677;GO:0003723;GO:0003723;GO:0003723;GO:0003725;GO:0003725;GO:0003725;GO:0003725;GO:0005515;GO:0005524;GO:0005524;GO:0005634;GO:0005634;GO:0005654;GO:0005654;GO:0005730;GO:0005730;GO:0005737;GO:0005737;GO:0005829;GO:0005829;GO:0006955;GO:0006955;GO:0009615;GO:0009615;GO:0016740;GO:0016740;GO:0045071;GO:0045071;GO:0045087;GO:0051607;GO:0051607;GO:0051607;GO:0051607;GO:…	K14608	-	NOG309765	-	2'-5' oligoadenylate synthetase-like 1 [Source:MGISymbol;Acc:MGI:2180849]	231655	Q8VI94
ENSMUSG00000062785	Kcnc3	10.6241	4.94366	16.3045	3.29806	1.72162	0.0486065	0.315341	7	44590664	44604754	+	5995	GO:0005216;GO:0005216;GO:0005244;GO:0005249;GO:0005249;GO:0005267;GO:0005515;GO:0006811;GO:0006811;GO:0006811;GO:0006813;GO:0006813;GO:0006813;GO:0008076;GO:0008076;GO:0016020;GO:0016020;GO:0016020;GO:0016021;GO:0016021;GO:0016021;GO:0034765;GO:0051260;GO:0051260;GO:0055085;GO:0055085;GO:0071805;GO:0005216;GO:0005216;GO:0005244;GO:0005249;GO:0005249;GO:0005267;GO:0005515;GO:0006811;GO:0006811;GO:…	K04889	-	-	-	potassium voltage gated channel, Shaw-relatedsubfamily, member 3 [Source:MGI Symbol;Acc:MGI:96669]	16504	-
ENSMUSG00000035370	Gm49322	24.1207	11.2371	37.0043	3.29305	1.71942	0.00231431	0.0432871	10	80606021	80615784	+	4520	GO:0002100;GO:0003824;GO:0008033;GO:0046872;GO:0052717;GO:0052718;GO:0002100;GO:0003824;GO:0003824;GO:0008033;GO:0046872;GO:0052717;GO:0052718;	-	-	COG0590	FJ	predicted gene, 49322 [Source:MGISymbol;Acc:MGI:6121503]	-	-
ENSMUSG00000109378	Gm49396	17.6959	8.27466	27.1172	3.27714	1.71244	0.0339537	0.259655	7	30563344	30567960	+	3234	GO:0000398;GO:0000398;GO:0003676;GO:0003723;GO:0003723;GO:0005515;GO:0005515;GO:0005634;GO:0005681;GO:0005681;GO:0005737;GO:0006397;GO:0008380;GO:0016607;GO:0030628;GO:0046872;GO:0046872;GO:0048511;GO:0089701;GO:0089701;GO:0000398;GO:0003676;GO:0003723;GO:0046872;GO:0046872;GO:0089701;GO:0000398;GO:0000398;GO:0003676;GO:0003723;GO:0003723;GO:0005515;GO:0005515;GO:0005634;GO:0005681;GO:0005681;GO:…	-	-	-	-	predicted gene, 49396 [Source:MGISymbol;Acc:MGI:6121629]	-	-
ENSMUSG00000024512	Dynap	29.4374	14.2934	44.5814	3.11901	1.64109	0.00112533	0.0255629	18	70240429	70244582	-	1225	GO:0003674;GO:0016020;GO:0016021;	-	-	NOG85574	-	dynactin associated protein [Source:MGISymbol;Acc:MGI:1922827]	75577	Q9D7M5
ENSMUSG00000069855	Slc47a2	12.0981	5.88733	18.3089	3.10988	1.63686	0.0439541	0.298793	11	61301631	61342860	-	2421	GO:0005575;GO:0006855;GO:0006855;GO:0015238;GO:0015297;GO:0015297;GO:0016020;GO:0016020;GO:0016020;GO:0016021;GO:0042908;GO:0042910;GO:0042910;GO:0055085;GO:0055085;GO:0006855;GO:0015238;GO:0015297;GO:0015297;GO:0016020;GO:0016020;GO:0016020;GO:0016021;GO:0042908;GO:0042910;GO:0055085;GO:0055085;	K03327	-	COG0534	V	solute carrier family 47, member 2 [Source:MGISymbol;Acc:MGI:3588190]	380701	Q3V050
ENSMUSG00000099655	2310034G01Rik	23.3014	11.3873	35.2156	3.09252	1.62878	0.00921227	0.112718	19	46348201	46350302	-	1373	-	-	-	-	-	RIKEN cDNA 2310034G01 gene [Source:MGISymbol;Acc:MGI:1922829]	-	-
ENSMUSG00000071470	Ccnb1ip1	33.6703	17.1056	50.2349	2.93674	1.55422	0.00100197	0.0235295	14	50789248	50807732	-	1883	GO:0000794;GO:0000795;GO:0001825;GO:0004842;GO:0005634;GO:0005694;GO:0007131;GO:0007131;GO:0007286;GO:0016567;GO:0016740;GO:0046872;GO:0051026;GO:0051026;GO:0051321;GO:0061630;	K10639	EC:2.3.2.27	-	-	cyclin B1 interacting protein 1 [Source:MGISymbol;Acc:MGI:2685134]	239083	D3Z3K2
ENSMUSG00000103711	Tstd1	19.1752	9.83099	28.5194	2.90097	1.53654	0.0149022	0.155124	1	171418872	171420352	+	867	GO:0003674;GO:0005737;GO:0005737;GO:0005737;GO:0005739;GO:0005829;GO:0005829;GO:0008150;GO:0036464;GO:0036464;	K01013	EC:2.8.1.-	-	-	thiosulfate sulfurtransferase (rhodanese)-likedomain containing 1 [Source:MGI Symbol;Acc:MGI:3648482]	226654	E9PY03
ENSMUSG00000075023	Accsl	79.9721	41.1925	118.752	2.88285	1.52749	6.74404e-07	6.12788e-05	2	93855361	93869157	-	2801	GO:0003824;GO:0003824;GO:0005575;GO:0008150;GO:0009058;GO:0009058;GO:0030170;GO:0030170;GO:0003824;GO:0003824;	-	-	COG0436	E	1-aminocyclopropane-1-carboxylate synthase (non-functional)-like [Source:MGI Symbol;Acc:MGI:3584519]	381411	Q3UX83
ENSMUSG00000072770	Acrbp	17.1019	8.81221	25.3916	2.88141	1.52677	0.0228165	0.203188	6	125049689	125063267	+	3277	GO:0001669;GO:0001669;GO:0001669;GO:0001675;GO:0002080;GO:0005515;GO:0005576;GO:0007286;GO:0007286;GO:0009566;GO:0010952;GO:0016504;GO:0031410;GO:0001669;GO:0001669;GO:0001669;GO:0001675;GO:0002080;GO:0005515;GO:0005576;GO:0007286;GO:0007286;GO:0009566;GO:0010952;GO:0016504;GO:0031410;	-	-	NOG45475	-	proacrosin binding protein [Source:MGISymbol;Acc:MGI:1859515]	54137	Q3V140
ENSMUSG00000054793	Cadm4	17.3572	9.34977	25.3646	2.71286	1.43982	0.0290429	0.233864	7	24482023	24504539	+	2161	GO:0001932;GO:0001932;GO:0001932;GO:0001933;GO:0001933;GO:0001933;GO:0007155;GO:0010801;GO:0010801;GO:0010801;GO:0016020;GO:0016021;GO:0019903;GO:0030948;GO:0030971;GO:0031252;GO:0031252;GO:0031252;GO:0035020;GO:0035020;GO:0035020;GO:0042127;GO:0042127;GO:0042127;GO:0043183;GO:0043184;GO:0043184;GO:0043184;GO:0044291;GO:0044291;GO:0044291;GO:0050732;GO:0050732;GO:0050732;GO:0061041;GO:0061041;GO:…	K06783	-	NOG40137	-	cell adhesion molecule 4 [Source:MGISymbol;Acc:MGI:2449088]	260299	Q8R464
ENSMUSG00000036151	Tm6sf2	14.5812	7.88733	21.275	2.69737	1.43155	0.0474254	0.311215	8	70072924	70080066	+	1901	GO:0005789;GO:0016020;GO:0016021;GO:0019216;GO:0033116;GO:0016020;GO:0016021;	-	-	NOG40028	-	transmembrane 6 superfamily member 2 [Source:MGISymbol;Acc:MGI:1933210]	107770	Q8R1J1;A0A0R4J0J9
ENSMUSG00000071713	Csf2rb	97.1573	53.1104	141.204	2.65869	1.41072	1.33426e-06	0.000108865	15	78325752	78353847	+	7277	GO:0001558;GO:0004896;GO:0004896;GO:0005515;GO:0005515;GO:0005515;GO:0016020;GO:0016020;GO:0016020;GO:0016021;GO:0016021;GO:0016021;GO:0019221;GO:0019221;GO:0019221;GO:0001558;GO:0004896;GO:0004896;GO:0005515;GO:0005515;GO:0005515;GO:0016020;GO:0016020;GO:0016020;GO:0016021;GO:0016021;GO:0016021;GO:0019221;GO:0019221;GO:0019221;GO:0004896;GO:0004896;GO:0005515;GO:0016020;GO:0016020;GO:0016020;GO:…	K04738	-	NOG39324	S	colony stimulating factor 2 receptor, beta, low-affinity (granulocyte-macrophage) [Source:MGISymbol;Acc:MGI:1339759]	12983	P26955
ENSMUSG00000070337	Gpr179	27.6401	15.2559	40.0244	2.62354	1.39151	0.00688881	0.0930455	11	97332109	97352077	-	9542	GO:0004930;GO:0004930;GO:0005515;GO:0007186;GO:0007186;GO:0007601;GO:0007601;GO:0007601;GO:0016020;GO:0016021;GO:0016021;GO:0016021;GO:0044292;GO:0072659;	K22961	-	-	-	G protein-coupled receptor 179 [Source:MGISymbol;Acc:MGI:2443409]	217143	E9PY61
ENSMUSG00000031980	Agt	46.328	25.7301	66.926	2.60108	1.37911	0.00263922	0.0477448	8	124556534	124569706	-	1891	GO:0001822;GO:0002018;GO:0002027;GO:0003014;GO:0003051;GO:0003081;GO:0003081;GO:0003331;GO:0005179;GO:0005615;GO:0005615;GO:0005615;GO:0005615;GO:0005737;GO:0006606;GO:0006883;GO:0007166;GO:0007186;GO:0007186;GO:0007202;GO:0007204;GO:0007565;GO:0007568;GO:0008217;GO:0008284;GO:0008306;GO:0010536;GO:0010595;GO:0010613;GO:0010666;GO:0010873;GO:0010976;GO:0014061;GO:0014068;GO:0014824;GO:0014873;GO:…	K09821	-	-	-	angiotensinogen (serpin peptidase inhibitor, cladeA, member 8) [Source:MGI Symbol;Acc:MGI:87963]	11606	Q3UTR7
ENSMUSG00000021214	Akr1c18	313.849	174.575	453.122	2.59557	1.37605	0.00390591	0.0632901	13	4132615	4150654	-	1207	GO:0001758;GO:0004032;GO:0004032;GO:0004033;GO:0004745;GO:0005634;GO:0005737;GO:0005737;GO:0005829;GO:0005829;GO:0006693;GO:0006709;GO:0007186;GO:0007567;GO:0008106;GO:0008202;GO:0008284;GO:0010942;GO:0016229;GO:0016488;GO:0016491;GO:0016491;GO:0016491;GO:0016491;GO:0016655;GO:0018636;GO:0034614;GO:0035410;GO:0042448;GO:0042448;GO:0042574;GO:0044597;GO:0044597;GO:0044598;GO:0044598;GO:0045550;GO:…	K05295	EC:1.1.1.149	COG0656	R	aldo-keto reductase family 1, member C18[Source:MGI Symbol;Acc:MGI:2145420]	105349	Q8K023;Q3U538
ENSMUSG00000027932	Slc27a3	91.3087	51.1925	131.425	2.56727	1.36023	8.75937e-05	0.0035826	3	90385239	90389938	-	2569	GO:0001676;GO:0003824;GO:0003824;GO:0004467;GO:0004467;GO:0005783;GO:0016021;GO:0016021;GO:0031957;GO:0031957;GO:0001676;GO:0003824;GO:0003824;GO:0004467;GO:0004467;GO:0016021;GO:0016021;GO:0031957;GO:0031957;	K08772	EC:6.2.1.-	-	-	solute carrier family 27 (fatty acid transporter),member 3 [Source:MGI Symbol;Acc:MGI:1347358]	26568	O88561;G3X8Y7
ENSMUSG00000040165	Cd209c	28.768	16.1995	41.3365	2.55171	1.35146	0.0079476	0.102087	8	3940222	3954746	-	1997	GO:0005537;GO:0005537;GO:0005575;GO:0008150;GO:0030246;GO:0046872;	K06563	-	NOG249923	-	CD209c antigen [Source:MGI Symbol;Acc:MGI:2157945]"	170776	Q91ZW9
ENSMUSG00000090963	Gm17655	38.9783	22.0681	55.8884	2.53255	1.34059	0.00202123	0.0387573	5	110046139	110072513	-	1776	GO:0003676;GO:0003676;GO:0005622;GO:0006355;GO:0006355;GO:0046872;GO:0003676;GO:0003676;	-	-	-	-	predicted gene, 17655 [Source:MGISymbol;Acc:MGI:4937289]	-	-
ENSMUSG00000070313	Pate14	25.3355	14.3498	36.3213	2.53114	1.33979	0.0328969	0.253658	9	36635754	36643376	-	2471	GO:0005576;GO:0005615;	-	-	NOG138740	L	prostate and testis expressed 14 [Source:MGISymbol;Acc:MGI:3055869]	235973	Q3UN54
ENSMUSG00000041954	Tnfrsf18	44.377	25.1808	63.5733	2.52468	1.3361	0.000961385	0.0226428	4	156026164	156028895	+	1524	GO:0002687;GO:0005031;GO:0005031;GO:0005515;GO:0005515;GO:0005515;GO:0005576;GO:0005886;GO:0005887;GO:0005887;GO:0006915;GO:0009897;GO:0016020;GO:0016021;GO:0033209;GO:0042531;GO:0043066;GO:0043066;GO:0045785;GO:0045785;GO:0002687;GO:0005031;GO:0005031;GO:0005515;GO:0005515;GO:0005576;GO:0005886;GO:0005887;GO:0005887;GO:0006915;GO:0009897;GO:0016020;GO:0016021;GO:0033209;GO:0042531;GO:0043066;GO:…	K05154	-	NOG46178	S	tumor necrosis factor receptor superfamily, member18 [Source:MGI Symbol;Acc:MGI:894675]	21936	O35714;Q540M6
ENSMUSG00000072915	Gm12258	173.92	99.047	248.792	2.51186	1.32876	0.000334668	0.0103923	11	58847158	58861956	+	4429	GO:0003676;GO:0003676;GO:0003700;GO:0005622;GO:0005634;GO:0006355;GO:0006355;GO:0046872;GO:0003676;GO:0003676;GO:0003700;GO:0005634;GO:0006355;	K09228	-	COG5048	R	predicted gene 12258 [Source:MGISymbol;Acc:MGI:3651534]	108167848	Q5NC63
ENSMUSG00000040703	Cyp2s1	17.1251	9.79344	24.4568	2.49726	1.32035	0.0482969	0.314382	7	25802475	25816913	-	4938	GO:0004497;GO:0004497;GO:0004796;GO:0005506;GO:0005506;GO:0005737;GO:0005783;GO:0005783;GO:0005783;GO:0005789;GO:0006082;GO:0006690;GO:0006693;GO:0006805;GO:0008392;GO:0008395;GO:0016020;GO:0016491;GO:0016705;GO:0016705;GO:0016712;GO:0016712;GO:0016712;GO:0016836;GO:0019373;GO:0020037;GO:0020037;GO:0020037;GO:0031090;GO:0042573;GO:0042738;GO:0043231;GO:0043231;GO:0043231;GO:0043231;GO:0046872;GO:…	K07420	EC:1.14.14.1	COG2124	Q	cytochrome P450, family 2, subfamily s, polypeptide1 [Source:MGI Symbol;Acc:MGI:1921384]	74134	Q9DBX6
ENSMUSG00000021815	Mss51	114.923	65.8921	163.953	2.48821	1.31511	7.12761e-06	0.000448759	14	20482867	20496901	-	1826	GO:0003674;GO:0005575;GO:0008150;GO:0046872;	K17656	-	NOG45164	-	MSS51 mitochondrial translational activator[Source:MGI Symbol;Acc:MGI:1922093]	74843	Q9D5Z5
ENSMUSG00000097333	Zfp87	124.714	71.5165	177.912	2.48771	1.31482	1.05351e-07	1.26674e-05	13	67515781	67526177	-	2865	GO:0003674;GO:0003676;GO:0003676;GO:0005622;GO:0006355;GO:0006355;GO:0008150;GO:0046872;GO:0003674;GO:0003676;GO:0006355;GO:0008150;GO:0003674;GO:0003676;GO:0003676;GO:0005622;GO:0006355;GO:0006355;GO:0008150;GO:0003674;GO:0003676;GO:0003676;GO:0005622;GO:0006355;GO:0006355;GO:0008150;	K09228	-	-	-	zinc finger protein 87 [Source:MGISymbol;Acc:MGI:107768]	170763	Q8K2A4
ENSMUSG00000040747	Cd53	23.8015	13.6995	33.9034	2.47479	1.3073	0.0189455	0.180408	3	106759921	106790149	-	1742	GO:0001772;GO:0001772;GO:0005886;GO:0005887;GO:0005911;GO:0009986;GO:0009986;GO:0016020;GO:0016021;GO:0016021;GO:0016021;GO:0030054;GO:1901741;	K06489	-	NOG265641	-	CD53 antigen [Source:MGI Symbol;Acc:MGI:88341]"	12508	Q61451;Q3U0W1;Q3TV80
ENSMUSG00000001642	Akr1b3	5060.08	2921.22	7198.94	2.46436	1.30122	7.87221e-10	1.67857e-07	6	34302434	34317478	-	8384	GO:0001523;GO:0001523;GO:0001523;GO:0001758;GO:0001758;GO:0001758;GO:0001894;GO:0001894;GO:0003091;GO:0004032;GO:0004032;GO:0004032;GO:0004032;GO:0004032;GO:0005615;GO:0005615;GO:0005654;GO:0005654;GO:0005737;GO:0005829;GO:0005829;GO:0005829;GO:0005829;GO:0005996;GO:0005996;GO:0006061;GO:0006061;GO:0008106;GO:0009414;GO:0009414;GO:0010033;GO:0010033;GO:0016491;GO:0016491;GO:0016491;GO:0016491;GO:…	K00011	EC:1.1.1.21	COG0656	R	aldo-keto reductase family 1, member B3 (aldosereductase) [Source:MGI Symbol;Acc:MGI:1353494]	11677	P45376;Q3UDY1
ENSMUSG00000038400	Pmepa1	202.9	119.345	286.454	2.40021	1.26316	0.0304894	0.241499	2	173224458	173276533	-	4913	GO:0000139;GO:0010008;GO:0010991;GO:0010991;GO:0010991;GO:0016020;GO:0016021;GO:0030512;GO:0030512;GO:0030512;GO:0031901;GO:0043231;GO:0050699;GO:0060394;GO:0070412;GO:0070412;GO:0070412;GO:0010991;GO:0010991;GO:0016020;GO:0016021;GO:0030512;GO:0030512;GO:0070412;GO:0070412;	-	-	-	-	prostate transmembrane protein, androgen induced 1[Source:MGI Symbol;Acc:MGI:1929600]	65112	A2APF4
ENSMUSG00000026259	Ngef	127.233	74.8545	179.611	2.39946	1.26271	2.14193e-07	2.37873e-05	1	87476834	87573870	-	3905	GO:0005085;GO:0005085;GO:0005089;GO:0005089;GO:0005515;GO:0005515;GO:0005737;GO:0005829;GO:0007275;GO:0007399;GO:0009987;GO:0016020;GO:0030154;GO:0030426;GO:0035023;GO:0035023;GO:0042995;GO:0043087;GO:0046875;GO:0048013;GO:0061002;GO:0098883;GO:0098978;GO:0005089;GO:0005089;GO:0005515;GO:0035023;GO:0035023;GO:0005515;	K07525	-	COG5422	T	neuronal guanine nucleotide exchange factor[Source:MGI Symbol;Acc:MGI:1858414]	53972	Q8CHT1;E9QK62
ENSMUSG00000045349	Sh2d5	29.9058	17.7559	42.0557	2.36855	1.244	0.0112337	0.128688	4	138250403	138261332	+	3740	GO:0005515;GO:0005515;GO:0005515;GO:0005886;GO:0008150;GO:0014069;GO:0016020;GO:0030054;GO:0045202;GO:0045211;GO:0005515;GO:0005515;GO:0005515;GO:0005886;GO:0008150;GO:0014069;GO:0016020;GO:0030054;GO:0045202;GO:0045211;	-	-	-	-	SH2 domain containing 5 [Source:MGISymbol;Acc:MGI:2446215]	230863	Q8JZW5;A2AM67
ENSMUSG00000031351	Zfp185	32.038	19.162	44.914	2.34391	1.22892	0.00935259	0.113668	X	72987339	73031543	+	3707	GO:0015629;GO:0015629;GO:0046872;GO:0051015;GO:0051015;GO:0015629;GO:0015629;GO:0046872;GO:0051015;GO:0051015;GO:0015629;GO:0015629;GO:0051015;GO:0051015;	-	-	-	-	zinc finger protein 185 [Source:MGISymbol;Acc:MGI:108095]	22673	Q62394;Q8C875;A2BI37;Q9CRR9
ENSMUSG00000016028	Celsr1	41.4932	25.0305	57.9559	2.31541	1.21127	0.027313	0.226904	15	85898929	86033777	-	11007	GO:0001702;GO:0001736;GO:0001764;GO:0001843;GO:0001843;GO:0001942;GO:0004888;GO:0004888;GO:0004888;GO:0004930;GO:0004930;GO:0004930;GO:0005509;GO:0005509;GO:0005509;GO:0005515;GO:0005515;GO:0005654;GO:0005654;GO:0005886;GO:0005886;GO:0005886;GO:0005886;GO:0005886;GO:0005887;GO:0007155;GO:0007155;GO:0007156;GO:0007156;GO:0007165;GO:0007166;GO:0007166;GO:0007186;GO:0007186;GO:0007186;GO:0007266;GO:…	K04600	-	NOG12793	-	cadherin, EGF LAG seven-pass G-type receptor 1[Source:MGI Symbol;Acc:MGI:1100883]	12614	O35161
ENSMUSG00000017607	Tns4	404.847	244.392	565.303	2.3131	1.20982	8.17482e-16	4.21715e-13	11	99065678	99089306	-	5167	GO:0003674;GO:0003779;GO:0005515;GO:0005737;GO:0005856;GO:0005925;GO:0005925;GO:0005925;GO:0006915;GO:0008104;GO:0008104;GO:0030054;	K18080	-	NOG317340	-	tensin 4 [Source:MGI Symbol;Acc:MGI:2144377]"	217169	Q8BZ33
ENSMUSG00000041046	Ramp3	267.944	161.988	373.9	2.30819	1.20676	1.89678e-06	0.000145833	11	6658521	6677475	+	1380	GO:0001525;GO:0001605;GO:0001605;GO:0001921;GO:0001921;GO:0005623;GO:0005623;GO:0005764;GO:0005764;GO:0005886;GO:0005886;GO:0005886;GO:0006816;GO:0006816;GO:0006816;GO:0006886;GO:0006886;GO:0007186;GO:0007186;GO:0007189;GO:0007189;GO:0008277;GO:0008277;GO:0008565;GO:0009986;GO:0009986;GO:0009986;GO:0010628;GO:0010628;GO:0010739;GO:0010739;GO:0010942;GO:0010942;GO:0015026;GO:0015026;GO:0015026;GO:…	K08449	-	NOG39494	K	receptor (calcitonin) activity modifying protein 3[Source:MGI Symbol;Acc:MGI:1860292]	56089	Q9WUP1
ENSMUSG00000043441	Gpr149	427.03	261.092	592.969	2.27111	1.1834	7.1145e-07	6.42797e-05	3	62529077	62605140	-	4288	GO:0001546;GO:0001547;GO:0004930;GO:0004930;GO:0005886;GO:0005887;GO:0007165;GO:0007186;GO:0007218;GO:0016020;GO:0016021;GO:0016021;GO:0016021;GO:0030273;GO:0042277;GO:0060280;	K08433	-	NOG298309	-	G protein-coupled receptor 149 [Source:MGISymbol;Acc:MGI:2443628]	229357	Q3UVY1
ENSMUSG00000063193	Cd300lb	301.501	184.801	418.202	2.26299	1.17823	6.90747e-11	1.88569e-08	11	114922781	114934386	-	2917	GO:0016020;GO:0016021;GO:0016020;GO:0016021;	K20395	-	NOG278217	-	CD300 molecule like family member B [Source:MGISymbol;Acc:MGI:2685099]	217304	Q3U497;Q3TEQ8;A0A0R3P9D2
ENSMUSG00000030703	Gdpd3	29.4763	18.2183	40.7343	2.2359	1.16086	0.0195363	0.183995	7	126766334	126775649	+	2186	GO:0004622;GO:0004622;GO:0005737;GO:0005783;GO:0005789;GO:0005789;GO:0005789;GO:0006629;GO:0006629;GO:0006644;GO:0006644;GO:0008081;GO:0008081;GO:0008081;GO:0016020;GO:0016021;GO:0016787;GO:0034638;GO:0046475;GO:0046872;GO:0048471;	K22387	EC:3.1.4.39	COG0584	C	glycerophosphodiester phosphodiesterase domaincontaining 3 [Source:MGI Symbol;Acc:MGI:1915866]	68616	Q99LY2
ENSMUSG00000032131	Abcg4	48.3405	29.8991	66.782	2.23358	1.15936	0.00292119	0.0510562	9	44273188	44288615	-	5211	GO:0000166;GO:0005524;GO:0005524;GO:0005524;GO:0005886;GO:0016020;GO:0016020;GO:0016020;GO:0016021;GO:0016887;GO:0016887;GO:0033344;GO:0042626;GO:0042803;GO:0046982;GO:0055085;GO:0099131;GO:1990830;GO:0000166;GO:0005524;GO:0005524;GO:0005524;GO:0005886;GO:0016020;GO:0016020;GO:0016020;GO:0016021;GO:0016887;GO:0016887;GO:0033344;GO:0042626;GO:0042803;GO:0042803;GO:0046982;GO:0046982;GO:0055085;GO:…	K05680	-	-	-	ATP binding cassette subfamily G member 4[Source:MGI Symbol;Acc:MGI:1890594]	192663	Q91WA9
ENSMUSG00000025357	Dgka	46.029	28.5118	63.5463	2.22878	1.15625	0.00353165	0.0584055	10	128720134	128744855	-	4762	GO:0000166;GO:0003951;GO:0003951;GO:0004143;GO:0004143;GO:0004143;GO:0004143;GO:0004143;GO:0004143;GO:0005509;GO:0005509;GO:0005524;GO:0005543;GO:0005829;GO:0005886;GO:0005886;GO:0006654;GO:0006654;GO:0007165;GO:0007165;GO:0007205;GO:0007205;GO:0016301;GO:0016301;GO:0016301;GO:0016301;GO:0016301;GO:0016310;GO:0016740;GO:0035556;GO:0035556;GO:0035556;GO:0046339;GO:0046339;GO:0046339;GO:0046486;GO:…	K00901	EC:2.7.1.107	NOG47311	-	diacylglycerol kinase, alpha [Source:MGISymbol;Acc:MGI:102952]	13139	O88673
ENSMUSG00000000730	Dnmt3l	26.1803	16.2371	36.1234	2.22475	1.15364	0.0290261	0.233864	10	78041947	78063622	+	2988	GO:0000794;GO:0001701;GO:0001890;GO:0005515;GO:0005515;GO:0005634;GO:0005634;GO:0005654;GO:0005720;GO:0005737;GO:0006306;GO:0006306;GO:0006306;GO:0007141;GO:0007283;GO:0007283;GO:0008047;GO:0008168;GO:0010529;GO:0016740;GO:0019899;GO:0019899;GO:0019899;GO:0019899;GO:0030154;GO:0030234;GO:0030234;GO:0032259;GO:0032259;GO:0032776;GO:0035098;GO:0043046;GO:0043085;GO:0045892;GO:0045892;GO:0046872;GO:…	K17400	-	NOG69419	S	DNA (cytosine-5-)-methyltransferase 3-like[Source:MGI Symbol;Acc:MGI:1859287]	54427	Q9CWR8;A3EWM2
ENSMUSG00000075551	Cyp3a41a	30.8028	19.1995	42.4061	2.2087	1.1432	0.0430829	0.295338	5	145694049	145720136	-	2060	GO:0004497;GO:0004497;GO:0004497;GO:0005506;GO:0005506;GO:0005575;GO:0005783;GO:0005789;GO:0005789;GO:0009617;GO:0010468;GO:0016020;GO:0016491;GO:0016491;GO:0016705;GO:0016705;GO:0016712;GO:0016712;GO:0020037;GO:0020037;GO:0031090;GO:0032451;GO:0043231;GO:0043231;GO:0046872;GO:0050649;GO:0055114;GO:0055114;GO:0055114;GO:0070330;GO:0070988;GO:0101020;	K07424	EC:1.14.14.1	COG2124	Q	cytochrome P450, family 3, subfamily a, polypeptide41A [Source:MGI Symbol;Acc:MGI:1858451]	53973	Q9JMA7
ENSMUSG00000043090	Zfp866	399.644	249.249	550.04	2.20679	1.14195	3.71244e-14	1.74616e-11	8	69761326	69791178	-	5601	GO:0003700;GO:0005634;GO:0006355;GO:0008150;GO:0003676;GO:0003676;GO:0003700;GO:0005622;GO:0005634;GO:0006355;GO:0006355;GO:0008150;GO:0046872;	K09228	-	-	-	zinc finger protein 866 [Source:MGISymbol;Acc:MGI:3584369]	330788	Q6PGD2;Q8BIY7
ENSMUSG00000007033	Hspa1l	26.6546	16.7183	36.5908	2.18867	1.13005	0.0306583	0.242356	17	34972703	34979285	+	2472	GO:0000166;GO:0002199;GO:0005524;GO:0005524;GO:0005737;GO:0005829;GO:0005829;GO:0005829;GO:0006986;GO:0007275;GO:0007283;GO:0007339;GO:0008180;GO:0008180;GO:0016887;GO:0030154;GO:0031072;GO:0031072;GO:0031072;GO:0031625;GO:0031625;GO:0034605;GO:0034620;GO:0042026;GO:0042026;GO:0042026;GO:0042623;GO:0044183;GO:0044297;GO:0051082;GO:0051082;GO:0051082;GO:0051085;GO:0051787;GO:1903955;GO:1903955;	K03283	-	COG0443	O	heat shock protein 1-like [Source:MGISymbol;Acc:MGI:96231]	15482	P16627;A1L347
ENSMUSG00000109179	Gm35339	47.6939	29.9179	65.4699	2.18832	1.12982	0.00369951	0.0604316	15	76354432	76365201	+	6581	GO:0005515;	-	-	-	-	predicted gene, 35339 [Source:MGISymbol;Acc:MGI:5594498]	102638882	-
ENSMUSG00000069184	Zfp72	73.1013	45.9484	100.254	2.18189	1.12558	0.000367147	0.0111201	13	74369326	74390836	-	4157	GO:0003676;GO:0003676;GO:0005622;GO:0005634;GO:0006355;GO:0006355;GO:0044791;GO:0044794;GO:0046872;GO:0003676;GO:0003676;GO:0005622;GO:0005634;GO:0006355;GO:0006355;GO:0044791;GO:0044794;GO:0046872;	-	-	COG5048	R	zinc finger protein 72 [Source:MGISymbol;Acc:MGI:3033356]	238722	Q0VFY0
ENSMUSG00000061132	Blnk	277.92	175.002	380.837	2.17618	1.1218	0.0303118	0.240449	19	40928927	40994535	-	5991	GO:0005070;GO:0005070;GO:0005070;GO:0005515;GO:0005515;GO:0005737;GO:0005737;GO:0005737;GO:0005886;GO:0005886;GO:0005886;GO:0007169;GO:0009967;GO:0016020;GO:0035556;GO:0035556;GO:0035556;GO:0036464;GO:0036464;GO:0042113;	K07371	-	NOG44661	S	B cell linker [Source:MGI Symbol;Acc:MGI:96878]"	17060	Q9QUN3
ENSMUSG00000091387	Gcnt4	77.257	48.9296	105.584	2.15788	1.10962	0.00230327	0.0432322	13	96924689	96950906	+	5087	GO:0000139;GO:0002121;GO:0003829;GO:0005794;GO:0006486;GO:0008375;GO:0008375;GO:0016020;GO:0016020;GO:0016020;GO:0016021;GO:0016740;GO:0016757;GO:0042403;GO:0048729;GO:0048872;GO:0060993;	K09663	EC:2.4.1.-	-	-	glucosaminyl (N-acetyl) transferase 4, core 2(beta-1,6-N-acetylglucosaminyltransferase) [Source:MGISymbol;Acc:MGI:2684919]	218476	E9Q649
ENSMUSG00000030166	Rad52	199.766	127.702	271.83	2.12863	1.08992	1.01651e-06	8.6931e-05	6	119902698	119922828	+	5752	GO:0000724;GO:0000724;GO:0000724;GO:0000724;GO:0000730;GO:0000730;GO:0003677;GO:0003677;GO:0003677;GO:0003697;GO:0003697;GO:0005634;GO:0005634;GO:0005634;GO:0005634;GO:0005634;GO:0005634;GO:0006281;GO:0006281;GO:0006281;GO:0006310;GO:0006310;GO:0006310;GO:0006310;GO:0006310;GO:0006312;GO:0006974;GO:0006974;GO:0006974;GO:0010792;GO:0010792;GO:0010792;GO:0032991;GO:0032991;GO:0032993;GO:0032993;GO:…	K10873	-	COG5055	L	RAD52 homolog, DNA repair protein [Source:MGISymbol;Acc:MGI:101949]	19365	P43352
ENSMUSG00000003123	Lipe	166.908	106.991	226.826	2.12005	1.0841	4.50986e-07	4.29296e-05	7	25379527	25398710	-	5886	GO:0004806;GO:0005515;GO:0005615;GO:0005634;GO:0005737;GO:0005737;GO:0005739;GO:0005811;GO:0005811;GO:0005829;GO:0005829;GO:0005829;GO:0005886;GO:0005901;GO:0006361;GO:0006363;GO:0006629;GO:0008202;GO:0008203;GO:0008203;GO:0008203;GO:0016020;GO:0016042;GO:0016042;GO:0016042;GO:0016298;GO:0016298;GO:0016787;GO:0016787;GO:0016787;GO:0016788;GO:0017171;GO:0019433;GO:0019433;GO:0019901;GO:0033878;GO:…	K07188	EC:3.1.1.79	COG0657	I	lipase, hormone sensitive [Source:MGISymbol;Acc:MGI:96790]	16890	P54310
ENSMUSG00000040364	Sec1	48.957	31.4554	66.4586	2.11279	1.07915	0.00477776	0.0716754	7	45677686	45694402	-	2470	GO:0005794;GO:0005975;GO:0005975;GO:0006486;GO:0008107;GO:0008107;GO:0016020;GO:0016020;GO:0016020;GO:0016021;GO:0016740;GO:0016757;GO:0032580;GO:0036065;	K00718	EC:2.4.1.69	-	-	secretory blood group 1 [Source:MGISymbol;Acc:MGI:1928893]	56546	Q8CDC9
ENSMUSG00000050714	Zbtb26	241.43	156.383	326.478	2.08768	1.0619	6.74907e-09	1.1482e-06	2	37432168	37443135	-	9489	GO:0003676;GO:0003676;GO:0005515;GO:0042802;GO:0042802;GO:0003676;GO:0003676;GO:0005515;GO:0042802;	K10505	-	-	-	zinc finger and BTB domain containing 26[Source:MGI Symbol;Acc:MGI:2444402]	320633	Q6P9Q3
ENSMUSG00000029134	Plb1	61.5705	40.324	82.817	2.05379	1.03829	0.00237464	0.0440549	5	32232708	32366520	+	11660	GO:0004620;GO:0004620;GO:0004622;GO:0004622;GO:0004622;GO:0004623;GO:0004623;GO:0004623;GO:0005886;GO:0006629;GO:0006629;GO:0006629;GO:0006644;GO:0006644;GO:0016020;GO:0016021;GO:0016042;GO:0016298;GO:0016298;GO:0016324;GO:0016787;GO:0016788;GO:0016788;GO:0031526;GO:0031526;GO:0042572;GO:0050253;GO:0050253;GO:0102567;GO:0102568;GO:2000344;GO:0004620;GO:0004620;GO:0004622;GO:0004622;GO:0004622;GO:…	K14621	-	NOG311176	-	phospholipase B1 [Source:MGISymbol;Acc:MGI:1922406]	665270	Q3TTY0
ENSMUSG00000027896	Slc16a4	172.617	113.465	231.769	2.04265	1.03044	1.18126e-06	9.9425e-05	3	107291230	107312115	+	3879	GO:0005886;GO:0005887;GO:0008028;GO:0015293;GO:0015718;GO:0016020;GO:0016021;GO:0016021;GO:0016021;GO:0055085;GO:0055085;GO:0005886;GO:0005887;GO:0008028;GO:0015293;GO:0015718;GO:0016020;GO:0016021;GO:0016021;GO:0016021;GO:0055085;GO:0055085;	K08181	-	-	-	solute carrier family 16 (monocarboxylic acidtransporters), member 4 [Source:MGISymbol;Acc:MGI:2385183]	229699	Q8R0M8
ENSMUSG00000030031	Kbtbd8	94.6947	62.2606	127.129	2.04188	1.0299	0.000206835	0.00715435	6	95117240	95129790	+	5093	GO:0005515;GO:0005515;GO:0005737;GO:0005794;GO:0005819;GO:0005856;GO:0006417;GO:0006513;GO:0006513;GO:0006513;GO:0014029;GO:0014029;GO:0014029;GO:0014032;GO:0014032;GO:0014032;GO:0031463;GO:0031463;GO:0031463;GO:0005515;GO:0005737;GO:0005794;GO:0005819;GO:0005856;GO:0006417;GO:0006513;GO:0006513;GO:0014029;GO:0014029;GO:0014032;GO:0014032;GO:0031463;GO:0031463;	K10475	-	NOG328379	-	kelch repeat and BTB (POZ) domain containing 8[Source:MGI Symbol;Acc:MGI:2661430]	243574	Q3UQV5
ENSMUSG00000038871	Bpgm	1107.88	731.334	1484.43	2.02976	1.02131	4.49267e-21	3.78141e-18	6	34476207	34505613	+	3588	GO:0003824;GO:0003824;GO:0004082;GO:0004619;GO:0004619;GO:0006096;GO:0006096;GO:0006096;GO:0016787;GO:0016853;GO:0016868;GO:0016868;GO:0048821;GO:0003824;GO:0003824;GO:0004082;GO:0004619;GO:0004619;GO:0006096;GO:0006096;GO:0006096;GO:0016853;GO:0016868;GO:0016868;GO:0003824;GO:0003824;GO:0004082;GO:0004619;GO:0004619;GO:0006096;GO:0006096;GO:0006096;GO:0016853;GO:0016868;GO:0016868;GO:0003824;GO:…	K01837	-	COG0588	G	2,3-bisphosphoglycerate mutase [Source:MGISymbol;Acc:MGI:1098242]	12183	P15327
ENSMUSG00000067928	Zfp760	348.362	230.211	466.513	2.02645	1.01896	1.31642e-10	3.3955e-08	17	21707741	21725636	+	4209	GO:0003676;GO:0003676;GO:0003677;GO:0005622;GO:0005634;GO:0006355;GO:0006355;GO:0046872;	K09228	-	-	-	zinc finger protein 760 [Source:MGISymbol;Acc:MGI:2679257]	240034	Q5U4A6;E9QAF5
ENSMUSG00000023011	Faim2	31.1386	20.662	41.6152	2.0141	1.01013	0.0352892	0.264578	15	99497012	99528165	-	12520	GO:0002931;GO:0005515;GO:0005783;GO:0005794;GO:0005886;GO:0006915;GO:0007417;GO:0016020;GO:0016020;GO:0016021;GO:0021549;GO:0021680;GO:0021681;GO:0021702;GO:0030054;GO:0043523;GO:0043523;GO:0043523;GO:0043524;GO:0045121;GO:0045121;GO:0045121;GO:0045202;GO:0045211;GO:1902042;GO:1902042;GO:2001234;GO:0002931;GO:0005515;GO:0005783;GO:0005794;GO:0005886;GO:0006915;GO:0016020;GO:0016020;GO:0016021;GO:…	-	-	COG0670	S	Fas apoptotic inhibitory molecule 2 [Source:MGISymbol;Acc:MGI:1919643]	72393	Q8K097
ENSMUSG00000074657	Kif5a	63.6523	42.2676	85.037	2.01187	1.00854	0.002787	0.049577	10	127225696	127263348	-	6990	GO:0000166;GO:0000932;GO:0003777;GO:0003777;GO:0003777;GO:0003777;GO:0005515;GO:0005515;GO:0005515;GO:0005524;GO:0005524;GO:0005524;GO:0005737;GO:0005737;GO:0005829;GO:0005856;GO:0005871;GO:0005871;GO:0005874;GO:0005874;GO:0005874;GO:0007018;GO:0007018;GO:0007018;GO:0007411;GO:0008017;GO:0008017;GO:0008017;GO:0008017;GO:0008574;GO:0016192;GO:0016887;GO:0019894;GO:0030424;GO:0030425;GO:0032839;GO:…	K10396	-	COG5059	Z	kinesin family member 5A [Source:MGISymbol;Acc:MGI:109564]	16572	P33175;Q3US62
ENSMUSG00000046351	Zfp322a	434.045	288.254	579.836	2.01155	1.00831	4.35637e-12	1.69351e-09	13	23353103	23369208	-	6263	GO:0003676;GO:0003676;GO:0003677;GO:0003700;GO:0005515;GO:0005634;GO:0005634;GO:0005634;GO:0005634;GO:0005737;GO:0005813;GO:0005813;GO:0005829;GO:0005829;GO:0006355;GO:0035326;GO:0046872;GO:1902459;GO:0003676;GO:0003676;GO:0003676;GO:0003676;GO:0003676;GO:0003676;	-	-	COG5048	R	zinc finger protein 322A [Source:MGISymbol;Acc:MGI:2442566]	218100	Q8BZ89
ENSMUSG00000043140	Tmem186	309.72	205.876	413.564	2.00881	1.00634	1.30346e-06	0.000107448	16	8633229	8637712	-	3391	GO:0003674;GO:0005739;GO:0005739;GO:0008150;GO:0016020;GO:0016021;	-	-	NOG85564	S	transmembrane protein 186 [Source:MGISymbol;Acc:MGI:1913940]	66690	Q9CR76;Q78HW2
