# Supplementary material for: Functional genomics study of protein inhibitor of activated STAT1 in mouse hippocampal neuronal cells revealed by RNA sequencing
Source: Aging (Albany NY). 2021 Mar 24;13(6):9011–27. doi: 10.18632/aging.202749 (PMC8034905; doi:10.18632/aging.202749)
Supplement: Supplementary Table 2 [file aging-13-202749-s002.xls]

## Sheet: BP
#term ID	term description	observed gene count	background gene count	false discovery rate	matching proteins in your network (IDs)	matching proteins in your network (labels)
GO:0033993	response to lipid	40	825	3.43e-09	ENSMUSP00000000193,ENSMUSP00000020171,ENSMUSP00000021552,ENSMUSP00000021635,ENSMUSP00000021674,ENSMUSP00000023779,ENSMUSP00000025025,ENSMUSP00000025691,ENSMUSP00000025718,ENSMUSP00000025850,ENSMUSP00000029270,ENSMUSP00000029623,ENSMUSP00000031325,ENSMUSP00000031327,ENSMUSP00000033056,ENSMUSP00000035065,ENSMUSP00000047518,ENSMUSP00000047968,ENSMUSP00000048736,ENSMUSP00000053092,ENSMUSP00000054938,…	Adm,Akr1c18,Ankrd1,Areg,Arnt2,Ccl2,Ccna2,Ccr7,Cd300lb,Ctgf,Cxcl1,Dusp1,Fas,Fos,Fosl1,Gbp2,Jun,Junb,Mapk15,Mest,Nr1d1,Nr1d2,Nr1h4,Nr3c2,Nr4a1,Nr6a1,Paqr6,Ptger4,Ptgs2,Ptn,Pycard,Ramp3,S100b,Sgk1,Tlr2,Tnfrsf18,Tnfrsf26,Trib1,Zfp36,Zfp36l1
GO:0042127	regulation of cell population proliferation	54	1594	9.51e-08	ENSMUSP00000000193,ENSMUSP00000017881,ENSMUSP00000020171,ENSMUSP00000020692,ENSMUSP00000021552,ENSMUSP00000021635,ENSMUSP00000022368,ENSMUSP00000022709,ENSMUSP00000023610,ENSMUSP00000023779,ENSMUSP00000025025,ENSMUSP00000025363,ENSMUSP00000025691,ENSMUSP00000025850,ENSMUSP00000029270,ENSMUSP00000029574,ENSMUSP00000029623,ENSMUSP00000031325,ENSMUSP00000031327,ENSMUSP00000033056,ENSMUSP00000035065,…	A4gnt,Adam33,Adamts1,Adm,Agt,Akr1b3,Akr1c18,Areg,Arnt2,Btg2,Cck,Ccl2,Ccna2,Ccr7,Cited2,Cox17,Ctgf,Cxcl1,Dusp1,Egr1,Egr3,Epha1,Fas,Fosl1,Hbegf,Ifit3,Inpp5d,Jun,Junb,Lif,Mapk15,Matk,Mmp9,Nppb,Nr1d1,Nr3c2,Nr4a1,Per2,Pias1,Plau,Ptger4,Ptgs2,Ptn,Pycard,S100b,Spry1,Spry2,Tlr2,Tnfrsf18,Tnfrsf26,Trib1,Vcam1,Zfp36,Zfp36l1
GO:0048545	response to steroid hormone	22	298	1.55e-07	ENSMUSP00000000193,ENSMUSP00000020171,ENSMUSP00000021552,ENSMUSP00000021635,ENSMUSP00000021674,ENSMUSP00000023779,ENSMUSP00000025025,ENSMUSP00000025691,ENSMUSP00000025850,ENSMUSP00000031325,ENSMUSP00000035065,ENSMUSP00000047968,ENSMUSP00000053092,ENSMUSP00000057815,ENSMUSP00000069505,ENSMUSP00000088031,ENSMUSP00000099073,ENSMUSP00000105538,ENSMUSP00000108498,ENSMUSP00000114074,ENSMUSP00000114166,…	Adm,Akr1c18,Areg,Ccl2,Ctgf,Dusp1,Fas,Fos,Fosl1,Nr1d1,Nr1d2,Nr1h4,Nr3c2,Nr4a1,Nr6a1,Paqr6,Ptgs2,Ptn,S100b,Sgk1,Zfp36,Zfp36l1
GO:0002237	response to molecule of bacterial origin	22	315	2.53e-07	ENSMUSP00000000193,ENSMUSP00000021674,ENSMUSP00000025197,ENSMUSP00000025691,ENSMUSP00000025718,ENSMUSP00000029623,ENSMUSP00000031327,ENSMUSP00000033056,ENSMUSP00000035065,ENSMUSP00000048736,ENSMUSP00000053092,ENSMUSP00000054938,ENSMUSP00000057815,ENSMUSP00000064680,ENSMUSP00000068834,ENSMUSP00000069505,ENSMUSP00000073913,ENSMUSP00000099423,ENSMUSP00000099462,ENSMUSP00000102711,ENSMUSP00000132435,…	Adm,Ankrd1,Ccl2,Ccr7,Cd300lb,Cxcl1,Fas,Fos,Gbp2,Jun,Junb,Nr1d1,Nr1h4,Ptger4,Ptgs2,Pycard,Tap2,Tlr2,Tnfrsf18,Tnfrsf26,Trib1,Zfp36
GO:0007275	multicellular organism development	103	4603	2.53e-07	ENSMUSP00000000193,ENSMUSP00000000421,ENSMUSP00000004389,ENSMUSP00000006614,ENSMUSP00000007248,ENSMUSP00000016172,ENSMUSP00000016315,ENSMUSP00000017881,ENSMUSP00000020102,ENSMUSP00000020118,ENSMUSP00000020171,ENSMUSP00000020692,ENSMUSP00000021458,ENSMUSP00000021552,ENSMUSP00000021674,ENSMUSP00000022212,ENSMUSP00000022368,ENSMUSP00000022709,ENSMUSP00000023024,ENSMUSP00000023610,ENSMUSP00000023611,…	Ablim1,Adamts1,Adamts5,Adm,Agt,Akap5,Akr1b3,Amigo3,Ank3,Ankrd1,Areg,Arhgef28,Arnt2,Bpgm,Btg2,Camsap3,Cck,Ccl2,Ccna2,Ccnb1ip1,Ccr7,Celsr1,Chad,Cited2,Creb5,Cspg5,Csrnp1,Ctgf,Daam2,Dbp,Dnmt3l,Dusp1,Dusp6,Eda2r,Egr1,Egr2,Egr3,Epha1,Epha2,Etv1,Faim2,Fam101a,Fas,Flrt1,Fos,Fosl1,Gcnt4,Gpr110,Gpr149,Grcc10,Hbegf,Hspa1l,Ier2,Igsf10,Il17c,Inpp5d,Islr2,Jam3,Jun,Junb,Kbtbd8,Kif5a,Klf2,Lamb3,Lif,Mmp9,Myo7a,N…
GO:0009617	response to bacterium	29	566	2.53e-07	ENSMUSP00000000193,ENSMUSP00000006614,ENSMUSP00000021674,ENSMUSP00000023611,ENSMUSP00000025197,ENSMUSP00000025691,ENSMUSP00000025718,ENSMUSP00000029623,ENSMUSP00000031327,ENSMUSP00000033056,ENSMUSP00000035065,ENSMUSP00000048736,ENSMUSP00000053092,ENSMUSP00000054938,ENSMUSP00000057815,ENSMUSP00000064680,ENSMUSP00000068834,ENSMUSP00000069505,ENSMUSP00000073913,ENSMUSP00000076189,ENSMUSP00000091226,…	Adamts5,Adm,Ankrd1,Ccl2,Ccr7,Cd160,Cd300lb,Cxcl1,Epha2,Fas,Fos,Gbp2,Gbp3,Ifit3,Jun,Junb,Nr1d1,Nr1h4,Ptger4,Ptgs2,Pycard,Sp110,Tap2,Tlr2,Tnfrsf18,Tnfrsf26,Trib1,Trim30a,Zfp36
GO:0009719	response to endogenous stimulus	46	1289	2.53e-07	ENSMUSP00000000193,ENSMUSP00000020171,ENSMUSP00000020692,ENSMUSP00000021552,ENSMUSP00000021635,ENSMUSP00000021674,ENSMUSP00000023779,ENSMUSP00000025025,ENSMUSP00000025691,ENSMUSP00000025718,ENSMUSP00000025850,ENSMUSP00000026672,ENSMUSP00000026999,ENSMUSP00000029270,ENSMUSP00000029623,ENSMUSP00000031325,ENSMUSP00000035065,ENSMUSP00000036203,ENSMUSP00000037042,ENSMUSP00000038405,ENSMUSP00000041053,…	Adm,Adra2a,Akr1b3,Akr1c18,Ankrd1,Areg,Arnt2,Btg2,Ccl2,Ccna2,Ccr7,Cited2,Ctgf,Dusp1,Egr1,Egr2,Egr3,Fas,Flrt1,Fos,Fosl1,Ier2,Jun,Junb,Kcnd3,Klf2,Mapk15,Nr1d1,Nr1d2,Nr1h4,Nr3c2,Nr4a1,Nr6a1,Paqr6,Pde8a,Ptger4,Ptgs2,Ptn,Ramp3,S100b,Sgk1,Smad7,Tlr2,Usf1,Zfp36,Zfp36l1
GO:0009725	response to hormone	36	829	2.53e-07	ENSMUSP00000000193,ENSMUSP00000020171,ENSMUSP00000020692,ENSMUSP00000021552,ENSMUSP00000021635,ENSMUSP00000021674,ENSMUSP00000023779,ENSMUSP00000025025,ENSMUSP00000025691,ENSMUSP00000025850,ENSMUSP00000029270,ENSMUSP00000031325,ENSMUSP00000035065,ENSMUSP00000036203,ENSMUSP00000041053,ENSMUSP00000047518,ENSMUSP00000047968,ENSMUSP00000048736,ENSMUSP00000053092,ENSMUSP00000057815,ENSMUSP00000064680,…	Adm,Adra2a,Akr1b3,Akr1c18,Areg,Arnt2,Btg2,Ccl2,Ccna2,Ccr7,Ctgf,Dusp1,Egr1,Egr2,Fas,Fos,Fosl1,Jun,Junb,Mapk15,Nr1d1,Nr1d2,Nr1h4,Nr3c2,Nr4a1,Nr6a1,Paqr6,Ptger4,Ptgs2,Ptn,Ramp3,S100b,Sgk1,Usf1,Zfp36,Zfp36l1
GO:0010033	response to organic substance	70	2553	2.53e-07	ENSMUSP00000000080,ENSMUSP00000000193,ENSMUSP00000006614,ENSMUSP00000009727,ENSMUSP00000020118,ENSMUSP00000020171,ENSMUSP00000020692,ENSMUSP00000021271,ENSMUSP00000021552,ENSMUSP00000021635,ENSMUSP00000021674,ENSMUSP00000022709,ENSMUSP00000023779,ENSMUSP00000025025,ENSMUSP00000025197,ENSMUSP00000025295,ENSMUSP00000025691,ENSMUSP00000025718,ENSMUSP00000025850,ENSMUSP00000026672,ENSMUSP00000026999,…	Adm,Adra2a,Akr1b3,Akr1c18,Ankrd1,Areg,Arnt2,Btg2,Ccl2,Ccna2,Ccr7,Cd300lb,Chad,Cited2,Csf2rb,Ctgf,Cxcl1,Dusp1,Dusp6,Egr1,Egr2,Egr3,Epha2,Fas,Flrt1,Fos,Fosl1,Gbp2,Gbp3,Gp1ba,Ier2,Ifit3,Jun,Junb,Kcnd3,Klf2,Klf6,Lrrc19,Mapk15,Mest,Nr1d1,Nr1d2,Nr1h4,Nr3c2,Nr4a1,Nr6a1,Paqr6,Pde8a,Per1,Ppp1r15a,Ptger4,Ptgs2,Ptn,Pycard,Ramp3,S100b,Sgk1,Smad7,Spry2,Spry4,Syngr1,Tap2,Tlr2,Tnfrsf18,Tnfrsf26,Trib1,Usf1,Vcam1…
GO:0032501	multicellular organismal process	123	5888	2.53e-07	ENSMUSP00000000193,ENSMUSP00000000421,ENSMUSP00000003635,ENSMUSP00000004389,ENSMUSP00000006614,ENSMUSP00000007248,ENSMUSP00000008626,ENSMUSP00000016172,ENSMUSP00000016315,ENSMUSP00000017881,ENSMUSP00000020102,ENSMUSP00000020118,ENSMUSP00000020171,ENSMUSP00000020692,ENSMUSP00000021271,ENSMUSP00000021458,ENSMUSP00000021552,ENSMUSP00000021635,ENSMUSP00000021674,ENSMUSP00000022212,ENSMUSP00000022368,…	Ablim1,Acrbp,Adamts1,Adamts5,Adm,Adra2a,Agt,Akap5,Akr1b3,Akr1c18,Amigo3,Ank3,Ankrd1,Areg,Arhgef28,Arnt2,Bpgm,Btg2,Camsap3,Cck,Ccl2,Ccna2,Ccnb1ip1,Ccr7,Celsr1,Chad,Cited2,Creb5,Cspg5,Csrnp1,Ctgf,Daam2,Dbp,Dnmt3l,Dusp1,Dusp6,Eda2r,Egr1,Egr2,Egr3,Epha1,Epha2,Etv1,Faim2,Fam101a,Fas,Flrt1,Fos,Fosl1,Gcnt4,Gp1ba,Gpr110,Gpr149,Grcc10,Hbegf,Hspa1l,Ier2,Ier3,Igsf10,Il17c,Inpp5d,Islr2,Jam3,Jun,Junb,Kbtbd8,K…
GO:0032502	developmental process	112	5213	2.53e-07	ENSMUSP00000000193,ENSMUSP00000000421,ENSMUSP00000004389,ENSMUSP00000006614,ENSMUSP00000007248,ENSMUSP00000008626,ENSMUSP00000016172,ENSMUSP00000016315,ENSMUSP00000017881,ENSMUSP00000020102,ENSMUSP00000020118,ENSMUSP00000020171,ENSMUSP00000020692,ENSMUSP00000021458,ENSMUSP00000021552,ENSMUSP00000021674,ENSMUSP00000022212,ENSMUSP00000022327,ENSMUSP00000022368,ENSMUSP00000022709,ENSMUSP00000023024,…	Ablim1,Acrbp,Adamts1,Adamts5,Adm,Agt,Akap5,Akr1b3,Amigo3,Ank3,Ankrd1,Areg,Arhgef28,Arnt2,Bpgm,Btg2,Camsap3,Cck,Ccl2,Ccna2,Ccnb1ip1,Ccr7,Celsr1,Chad,Cited2,Creb5,Cspg5,Csrnp1,Ctgf,Daam2,Dbp,Dnmt3l,Dusp1,Dusp6,Eda2r,Egr1,Egr2,Egr3,Epha1,Epha2,Etv1,Faim2,Fam101a,Fas,Flrt1,Fos,Fosl1,Gcnt4,Gp1ba,Gpr110,Gpr149,Grcc10,Hbegf,Hspa1l,Ier2,Igsf10,Il17c,Inpp5d,Islr2,Jam3,Jun,Junb,Kbtbd8,Kif5a,Klf2,Lamb3,Ldb3…
GO:0042221	response to chemical	86	3532	2.53e-07	ENSMUSP00000000080,ENSMUSP00000000193,ENSMUSP00000006614,ENSMUSP00000009727,ENSMUSP00000017881,ENSMUSP00000020102,ENSMUSP00000020118,ENSMUSP00000020171,ENSMUSP00000020692,ENSMUSP00000021271,ENSMUSP00000021552,ENSMUSP00000021635,ENSMUSP00000021674,ENSMUSP00000022709,ENSMUSP00000023779,ENSMUSP00000025025,ENSMUSP00000025197,ENSMUSP00000025295,ENSMUSP00000025363,ENSMUSP00000025691,ENSMUSP00000025718,…	Ablim1,Adm,Adra2a,Akr1b3,Akr1c18,Ank3,Ankrd1,Areg,Arnt2,Btg2,Ccl2,Ccna2,Ccr7,Cd300lb,Chad,Cited2,Csf2rb,Ctgf,Cxcl1,Dusp1,Dusp6,Egr1,Egr2,Egr3,Epha2,Etv1,Fas,Flrt1,Fos,Fosl1,Gbp2,Gbp3,Gp1ba,Hbegf,Ier2,Ifit3,Jun,Junb,Kcnd3,Kif5a,Klf2,Klf6,Lrrc19,Mapk15,Mest,Mmp9,Nr1d1,Nr1d2,Nr1h4,Nr3c2,Nr4a1,Nr6a1,Paqr6,Pde8a,Per1,Pkd1l3,Plk3,Ppp1r15a,Ptger4,Ptgs2,Ptn,Pycard,Rad52,Ramp3,Rhob,Robo2,S100b,Sgk1,Slc17a…
GO:0051704	multi-organism process	57	1840	2.53e-07	ENSMUSP00000000193,ENSMUSP00000000421,ENSMUSP00000003635,ENSMUSP00000006614,ENSMUSP00000007248,ENSMUSP00000008626,ENSMUSP00000017881,ENSMUSP00000021635,ENSMUSP00000021674,ENSMUSP00000022353,ENSMUSP00000023610,ENSMUSP00000023611,ENSMUSP00000024699,ENSMUSP00000025197,ENSMUSP00000025691,ENSMUSP00000025718,ENSMUSP00000025850,ENSMUSP00000029574,ENSMUSP00000029623,ENSMUSP00000031327,ENSMUSP00000031540,…	Acrbp,Adamts1,Adamts5,Adm,Adra2a,Agt,Akr1b3,Akr1c18,Ankrd1,Ccl2,Ccnb1ip1,Ccr7,Cd160,Cd300lb,Cited2,Cldn6,Cxcl1,Dnmt3l,Epha2,Fas,Fos,Fosl1,Gbp2,Gbp3,Gcnt4,Gpr149,Hspa1l,Ier3,Ifit3,Jam3,Jun,Junb,Lif,Mmp9,Mss51,Nr1d1,Nr1h4,Nr6a1,Oasl1,Pias1,Ptger4,Ptgs2,Pycard,Rnf151,Shank3,Shcbp1l,Sp110,Tap2,Tlr2,Tnfrsf18,Tnfrsf26,Trib1,Trim30a,Tssk3,Usf1,Vcam1,Zfp36
GO:0048856	anatomical structure development	107	4912	3.28e-07	ENSMUSP00000000193,ENSMUSP00000000421,ENSMUSP00000004389,ENSMUSP00000006614,ENSMUSP00000007248,ENSMUSP00000016172,ENSMUSP00000016315,ENSMUSP00000017881,ENSMUSP00000020102,ENSMUSP00000020118,ENSMUSP00000020171,ENSMUSP00000020692,ENSMUSP00000021458,ENSMUSP00000021552,ENSMUSP00000021674,ENSMUSP00000022212,ENSMUSP00000022327,ENSMUSP00000022368,ENSMUSP00000022709,ENSMUSP00000023024,ENSMUSP00000023610,…	Ablim1,Acrbp,Adamts1,Adamts5,Adm,Agt,Akap5,Akr1b3,Amigo3,Ank3,Ankrd1,Areg,Arhgef28,Arnt2,Bpgm,Btg2,Camsap3,Cck,Ccl2,Ccna2,Ccnb1ip1,Ccr7,Celsr1,Chad,Cited2,Creb5,Cspg5,Csrnp1,Ctgf,Daam2,Dbp,Dnmt3l,Dusp1,Dusp6,Eda2r,Egr1,Egr2,Egr3,Epha1,Epha2,Etv1,Faim2,Fam101a,Fas,Flrt1,Fos,Fosl1,Gcnt4,Gp1ba,Gpr110,Gpr149,Grcc10,Hbegf,Hspa1l,Ier2,Igsf10,Il17c,Inpp5d,Islr2,Jam3,Jun,Junb,Kbtbd8,Kif5a,Klf2,Lamb3,Ldb3…
GO:0070887	cellular response to chemical stimulus	64	2287	3.37e-07	ENSMUSP00000000080,ENSMUSP00000000193,ENSMUSP00000006614,ENSMUSP00000009727,ENSMUSP00000017881,ENSMUSP00000020171,ENSMUSP00000021552,ENSMUSP00000021635,ENSMUSP00000021674,ENSMUSP00000022709,ENSMUSP00000023779,ENSMUSP00000025025,ENSMUSP00000025295,ENSMUSP00000025363,ENSMUSP00000025691,ENSMUSP00000025718,ENSMUSP00000026672,ENSMUSP00000026999,ENSMUSP00000029270,ENSMUSP00000029574,ENSMUSP00000029623,…	Adra2a,Akr1b3,Akr1c18,Ank3,Ankrd1,Ccl2,Ccna2,Ccr7,Cd300lb,Chad,Cited2,Csf2rb,Ctgf,Cxcl1,Dusp1,Egr1,Egr2,Egr3,Epha2,Fas,Flrt1,Fos,Gbp2,Gbp3,Gp1ba,Hbegf,Ifit3,Jun,Junb,Kcnd3,Klf2,Klf6,Lrrc19,Mmp9,Nr1d1,Nr1d2,Nr1h4,Nr3c2,Nr4a1,Nr6a1,Paqr6,Pde8a,Plk3,Ppp1r15a,Ptger4,Ptgs2,Ptn,Pycard,Rad52,Ramp3,Rhob,S100b,Sgk1,Smad7,Spry2,Spry4,Syngr1,Tlr2,Tnfrsf18,Tnfrsf26,Usf1,Vcam1,Zfp36,Zfp36l1
GO:0071310	cellular response to organic substance	56	1858	3.44e-07	ENSMUSP00000000080,ENSMUSP00000000193,ENSMUSP00000009727,ENSMUSP00000020171,ENSMUSP00000021552,ENSMUSP00000021635,ENSMUSP00000021674,ENSMUSP00000022709,ENSMUSP00000023779,ENSMUSP00000025025,ENSMUSP00000025295,ENSMUSP00000025691,ENSMUSP00000025718,ENSMUSP00000026672,ENSMUSP00000026999,ENSMUSP00000029270,ENSMUSP00000029574,ENSMUSP00000029623,ENSMUSP00000031327,ENSMUSP00000033056,ENSMUSP00000035065,…	Adra2a,Akr1b3,Akr1c18,Ankrd1,Ccl2,Ccna2,Ccr7,Cd300lb,Chad,Cited2,Csf2rb,Ctgf,Cxcl1,Dusp1,Egr1,Egr2,Egr3,Fas,Flrt1,Fos,Gbp2,Gbp3,Gp1ba,Ifit3,Jun,Junb,Kcnd3,Klf2,Klf6,Lrrc19,Nr1d1,Nr1d2,Nr1h4,Nr3c2,Nr4a1,Nr6a1,Paqr6,Pde8a,Ppp1r15a,Ptger4,Ptgs2,Ptn,Pycard,Ramp3,Sgk1,Smad7,Spry2,Spry4,Syngr1,Tlr2,Tnfrsf18,Tnfrsf26,Usf1,Vcam1,Zfp36,Zfp36l1
GO:0007154	cell communication	92	3984	4.57e-07	ENSMUSP00000000080,ENSMUSP00000000193,ENSMUSP00000000421,ENSMUSP00000003635,ENSMUSP00000006614,ENSMUSP00000016172,ENSMUSP00000017288,ENSMUSP00000017881,ENSMUSP00000020171,ENSMUSP00000021552,ENSMUSP00000021635,ENSMUSP00000021674,ENSMUSP00000022212,ENSMUSP00000023779,ENSMUSP00000025025,ENSMUSP00000025363,ENSMUSP00000025691,ENSMUSP00000025850,ENSMUSP00000026414,ENSMUSP00000026672,ENSMUSP00000026999,…	Adm,Adra2a,Agt,Akap5,Akr1b3,Akr1c18,Amotl2,Ank3,Areg,Arhgef28,Arnt2,Blnk,Cck,Ccl2,Ccna2,Ccr7,Cd160,Cd53,Celsr1,Chad,Cited2,Csf2rb,Csrnp1,Ctgf,Cxcl1,Daam2,Dgka,Dlgap2,Dusp1,Eda2r,Egr1,Egr3,Epha1,Epha2,Fas,Flrt1,Fos,Fosl1,Gp1ba,Gpr110,Gpr149,Gpr68,Hbegf,Ier3,Inpp5d,Jam3,Jun,Klf6,Lif,Lrrc19,Mapk15,Matk,Mmp9,Nfkbiz,Ngef,Nppb,Nr1d1,Nr1d2,Nr1h4,Nr3c2,Nr4a1,Nr6a1,P2ry14,Paqr6,Pde8a,Pias1,Plk2,Plk3,Ppp1r…
GO:0050896	response to stimulus	131	6616	4.64e-07	ENSMUSP00000000080,ENSMUSP00000000193,ENSMUSP00000000421,ENSMUSP00000003635,ENSMUSP00000006614,ENSMUSP00000009727,ENSMUSP00000016172,ENSMUSP00000017288,ENSMUSP00000017881,ENSMUSP00000020102,ENSMUSP00000020118,ENSMUSP00000020171,ENSMUSP00000020692,ENSMUSP00000021271,ENSMUSP00000021552,ENSMUSP00000021635,ENSMUSP00000021674,ENSMUSP00000022212,ENSMUSP00000022368,ENSMUSP00000022709,ENSMUSP00000023611,…	Ablim1,Adamts5,Adm,Adra2a,Agt,Akap5,Akr1b3,Akr1c18,Amotl2,Ank3,Ankrd1,Areg,Arhgef28,Arnt2,Blnk,Btg2,C1s1,Cck,Ccl2,Ccna2,Ccr7,Cd160,Cd300lb,Cd53,Celsr1,Chad,Cited2,Csf2rb,Csrnp1,Ctgf,Cxcl1,Daam2,Dgka,Dusp1,Dusp6,Eda2r,Egr1,Egr2,Egr3,Epha1,Epha2,Etv1,Faim2,Fas,Flrt1,Fos,Fosl1,Gbp2,Gbp3,Gp1ba,Gpr110,Gpr149,Gpr68,H60b,Hbegf,Ier2,Ier3,Ifit3,Igsf10,Il17c,Inpp5d,Jam3,Jun,Junb,Kcnd3,Kif5a,Klf2,Klf6,Lif,L…
GO:0051239	regulation of multicellular organismal process	73	2858	6.53e-07	ENSMUSP00000000193,ENSMUSP00000004389,ENSMUSP00000006614,ENSMUSP00000016172,ENSMUSP00000017881,ENSMUSP00000020118,ENSMUSP00000020171,ENSMUSP00000021271,ENSMUSP00000021552,ENSMUSP00000021674,ENSMUSP00000022212,ENSMUSP00000022368,ENSMUSP00000022709,ENSMUSP00000023610,ENSMUSP00000025363,ENSMUSP00000025691,ENSMUSP00000025718,ENSMUSP00000026999,ENSMUSP00000029623,ENSMUSP00000031325,ENSMUSP00000031327,…	Adam33,Adamts1,Adm,Adra2a,Agt,Akap5,Amigo3,Ankrd1,Areg,Cck,Ccl2,Ccr7,Celsr1,Chad,Cited2,Ctgf,Cxcl1,Daam2,Dusp6,Egr1,Egr2,Egr3,Epha1,Epha2,Fam101a,Fas,Flrt1,Fos,Gp1ba,Gpr149,Gpr68,Grcc10,Hbegf,Igsf10,Il17c,Inpp5d,Islr2,Jun,Kcnd3,Klf2,Lif,Mmp9,Nfkbiz,Ngef,Nppb,Nr1d2,Nr1h4,Per1,Per2,Per3,Plau,Plk2,Ptger4,Ptgs2,Ptn,Pycard,Rhob,Robo2,S100b,Sgk1,Shank3,Smad7,Sp100,Spry1,Spry2,Tbr1,Tlr2,Tnfrsf26,Trib1,T…
GO:0032496	response to lipopolysaccharide	20	298	7.84e-07	ENSMUSP00000000193,ENSMUSP00000021674,ENSMUSP00000025691,ENSMUSP00000025718,ENSMUSP00000031327,ENSMUSP00000033056,ENSMUSP00000035065,ENSMUSP00000048736,ENSMUSP00000053092,ENSMUSP00000054938,ENSMUSP00000057815,ENSMUSP00000064680,ENSMUSP00000068834,ENSMUSP00000069505,ENSMUSP00000073913,ENSMUSP00000099423,ENSMUSP00000099462,ENSMUSP00000102711,ENSMUSP00000132435,ENSMUSP00000140890	Adm,Ankrd1,Ccl2,Ccr7,Cd300lb,Cxcl1,Fas,Fos,Gbp2,Jun,Junb,Nr1d1,Nr1h4,Ptger4,Ptgs2,Pycard,Tnfrsf18,Tnfrsf26,Trib1,Zfp36
GO:0014070	response to organic cyclic compound	35	883	8.61e-07	ENSMUSP00000000193,ENSMUSP00000020118,ENSMUSP00000020171,ENSMUSP00000020692,ENSMUSP00000021271,ENSMUSP00000021552,ENSMUSP00000021635,ENSMUSP00000021674,ENSMUSP00000023779,ENSMUSP00000025025,ENSMUSP00000025691,ENSMUSP00000025718,ENSMUSP00000025850,ENSMUSP00000029270,ENSMUSP00000031325,ENSMUSP00000035065,ENSMUSP00000047518,ENSMUSP00000047968,ENSMUSP00000053092,ENSMUSP00000057815,ENSMUSP00000064680,…	Adm,Akr1c18,Ankrd1,Areg,Arnt2,Btg2,Ccl2,Ccna2,Ctgf,Dusp1,Dusp6,Egr1,Fas,Fos,Fosl1,Ifit3,Jun,Junb,Klf2,Mapk15,Nr1d1,Nr1d2,Nr1h4,Nr3c2,Nr4a1,Nr6a1,Paqr6,Per1,Ptgs2,Ptn,Ramp3,S100b,Sgk1,Zfp36,Zfp36l1
GO:0009653	anatomical structure morphogenesis	59	2089	8.78e-07	ENSMUSP00000000193,ENSMUSP00000004389,ENSMUSP00000006614,ENSMUSP00000016172,ENSMUSP00000016315,ENSMUSP00000017881,ENSMUSP00000020171,ENSMUSP00000021552,ENSMUSP00000022327,ENSMUSP00000022368,ENSMUSP00000022709,ENSMUSP00000023610,ENSMUSP00000023611,ENSMUSP00000023750,ENSMUSP00000023779,ENSMUSP00000025025,ENSMUSP00000025363,ENSMUSP00000025718,ENSMUSP00000026999,ENSMUSP00000029574,ENSMUSP00000029623,…	Ablim1,Adamts1,Adamts5,Adm,Agt,Ank3,Ankrd1,Areg,Arhgef28,Camsap3,Cck,Ccl2,Ccnb1ip1,Celsr1,Cited2,Csrnp1,Ctgf,Dusp1,Egr2,Egr3,Epha1,Epha2,Etv1,Faim2,Fam101a,Flrt1,Gcnt4,Gp1ba,Grcc10,Hbegf,Jam3,Jun,Junb,Kbtbd8,Kif5a,Klf2,Lamb3,Ldb3,Lif,Mmp9,Myo7a,Nr4a1,Plau,Ptger4,Ptgs2,Ptn,Rhob,Robo2,Rpgrip1,Sgk1,Shank3,Smad7,Spry1,Spry2,Tbr1,Tlr2,Tnfrsf26,Vcam1,Zfp36l1
GO:0030154	cell differentiation	82	3462	1.28e-06	ENSMUSP00000000193,ENSMUSP00000000421,ENSMUSP00000004389,ENSMUSP00000006614,ENSMUSP00000007248,ENSMUSP00000008626,ENSMUSP00000016172,ENSMUSP00000016315,ENSMUSP00000017881,ENSMUSP00000020118,ENSMUSP00000020171,ENSMUSP00000020692,ENSMUSP00000021552,ENSMUSP00000021674,ENSMUSP00000022212,ENSMUSP00000022327,ENSMUSP00000022709,ENSMUSP00000023610,ENSMUSP00000023750,ENSMUSP00000023779,ENSMUSP00000025691,…	Ablim1,Acrbp,Adamts1,Adm,Agt,Akap5,Ank3,Ankrd1,Areg,Arhgef28,Bpgm,Btg2,Camsap3,Cck,Ccl2,Ccnb1ip1,Ccr7,Celsr1,Cited2,Creb5,Cspg5,Ctgf,Daam2,Dnmt3l,Dusp6,Eda2r,Egr1,Egr2,Epha1,Epha2,Etv1,Faim2,Fas,Flrt1,Fos,Gpr110,Gpr149,Grcc10,Hspa1l,Ier2,Igsf10,Il17c,Islr2,Jam3,Jun,Junb,Kbtbd8,Kif5a,Klf2,Lamb3,Ldb3,Lif,Matk,Mmp9,Myo7a,Ngef,Nr1d1,Nr4a1,Nr6a1,Per2,Pias1,Plk2,Ptger4,Ptgs2,Ptn,Rhob,Rnf151,Robo2,Rpgri…
GO:1901700	response to oxygen-containing compound	46	1429	1.31e-06	ENSMUSP00000000193,ENSMUSP00000017881,ENSMUSP00000020171,ENSMUSP00000020692,ENSMUSP00000021271,ENSMUSP00000021552,ENSMUSP00000021635,ENSMUSP00000021674,ENSMUSP00000023779,ENSMUSP00000025025,ENSMUSP00000025691,ENSMUSP00000025718,ENSMUSP00000025850,ENSMUSP00000029270,ENSMUSP00000029574,ENSMUSP00000029623,ENSMUSP00000031325,ENSMUSP00000031327,ENSMUSP00000033056,ENSMUSP00000035065,ENSMUSP00000041053,…	Adm,Akr1b3,Akr1c18,Ankrd1,Areg,Arnt2,Btg2,Ccl2,Ccna2,Ccr7,Cd300lb,Ctgf,Cxcl1,Dusp1,Egr1,Egr2,Fas,Fos,Fosl1,Gbp2,Jun,Junb,Klf2,Mapk15,Mest,Mmp9,Nr1d1,Nr1h4,Nr4a1,Per1,Plk3,Ptger4,Ptgs2,Ptn,Pycard,Ramp3,Rhob,Sgk1,Tlr2,Tnfrsf18,Tnfrsf26,Trib1,Usf1,Vcam1,Zfp36,Zfp36l1
GO:2000026	regulation of multicellular organismal development	56	1961	1.44e-06	ENSMUSP00000000193,ENSMUSP00000006614,ENSMUSP00000016172,ENSMUSP00000017881,ENSMUSP00000020118,ENSMUSP00000020171,ENSMUSP00000021552,ENSMUSP00000021674,ENSMUSP00000022212,ENSMUSP00000022368,ENSMUSP00000022709,ENSMUSP00000023610,ENSMUSP00000025691,ENSMUSP00000025718,ENSMUSP00000026999,ENSMUSP00000029623,ENSMUSP00000031327,ENSMUSP00000035065,ENSMUSP00000037042,ENSMUSP00000037246,ENSMUSP00000038405,…	Adamts1,Adm,Agt,Akap5,Amigo3,Ankrd1,Ccl2,Ccr7,Celsr1,Chad,Cited2,Ctgf,Cxcl1,Daam2,Dusp6,Egr1,Egr3,Epha1,Epha2,Fam101a,Fas,Flrt1,Fos,Gpr68,Igsf10,Inpp5d,Islr2,Jun,Klf2,Lif,Mmp9,Nfkbiz,Ngef,Nr1d2,Nr1h4,Per2,Plau,Plk2,Ptger4,Ptgs2,Ptn,Rhob,Robo2,S100b,Sgk1,Shank3,Smad7,Sp100,Spry1,Spry2,Tbr1,Tlr2,Tnfrsf26,Trib1,Zfp36,Zfp36l1
GO:0023052	signaling	88	3859	1.49e-06	ENSMUSP00000000080,ENSMUSP00000000193,ENSMUSP00000000421,ENSMUSP00000003635,ENSMUSP00000006614,ENSMUSP00000016172,ENSMUSP00000017288,ENSMUSP00000020171,ENSMUSP00000021552,ENSMUSP00000021635,ENSMUSP00000021674,ENSMUSP00000022212,ENSMUSP00000023779,ENSMUSP00000025025,ENSMUSP00000025363,ENSMUSP00000025691,ENSMUSP00000026414,ENSMUSP00000026672,ENSMUSP00000026999,ENSMUSP00000029270,ENSMUSP00000029574,…	Adm,Adra2a,Agt,Akap5,Akr1b3,Akr1c18,Amotl2,Ank3,Areg,Arhgef28,Arnt2,Blnk,Cck,Ccl2,Ccna2,Ccr7,Cd160,Cd53,Celsr1,Chad,Cited2,Csf2rb,Csrnp1,Ctgf,Cxcl1,Daam2,Dgka,Dlgap2,Dusp1,Eda2r,Egr1,Egr3,Epha1,Epha2,Fas,Flrt1,Fos,Gp1ba,Gpr110,Gpr149,Gpr68,Hbegf,Ier3,Inpp5d,Jam3,Jun,Kcnd3,Klf6,Lif,Lrrc19,Mapk15,Matk,Nfkbiz,Ngef,Nppb,Nr1d1,Nr1d2,Nr1h4,Nr3c2,Nr4a1,Nr6a1,P2ry14,Paqr6,Pde8a,Pias1,Plk2,Plk3,Ppp1r15a,P…
GO:0048869	cellular developmental process	83	3545	1.49e-06	ENSMUSP00000000193,ENSMUSP00000000421,ENSMUSP00000004389,ENSMUSP00000006614,ENSMUSP00000007248,ENSMUSP00000008626,ENSMUSP00000016172,ENSMUSP00000016315,ENSMUSP00000017881,ENSMUSP00000020118,ENSMUSP00000020171,ENSMUSP00000020692,ENSMUSP00000021552,ENSMUSP00000021674,ENSMUSP00000022212,ENSMUSP00000022327,ENSMUSP00000022709,ENSMUSP00000023610,ENSMUSP00000023750,ENSMUSP00000023779,ENSMUSP00000025691,…	Ablim1,Acrbp,Adamts1,Adm,Agt,Akap5,Ank3,Ankrd1,Areg,Arhgef28,Bpgm,Btg2,Camsap3,Cck,Ccl2,Ccnb1ip1,Ccr7,Celsr1,Cited2,Creb5,Cspg5,Ctgf,Daam2,Dnmt3l,Dusp6,Eda2r,Egr1,Egr2,Epha1,Epha2,Etv1,Faim2,Fas,Flrt1,Fos,Gp1ba,Gpr110,Gpr149,Grcc10,Hspa1l,Ier2,Igsf10,Il17c,Islr2,Jam3,Jun,Junb,Kbtbd8,Kif5a,Klf2,Lamb3,Ldb3,Lif,Matk,Mmp9,Myo7a,Ngef,Nr1d1,Nr4a1,Nr6a1,Per2,Pias1,Plk2,Ptger4,Ptgs2,Ptn,Rhob,Rnf151,Robo2…
GO:0048518	positive regulation of biological process	110	5340	2.08e-06	ENSMUSP00000000080,ENSMUSP00000000193,ENSMUSP00000003635,ENSMUSP00000006614,ENSMUSP00000007248,ENSMUSP00000017881,ENSMUSP00000020000,ENSMUSP00000020118,ENSMUSP00000020171,ENSMUSP00000020298,ENSMUSP00000020692,ENSMUSP00000021271,ENSMUSP00000021552,ENSMUSP00000021635,ENSMUSP00000021674,ENSMUSP00000022212,ENSMUSP00000022368,ENSMUSP00000022709,ENSMUSP00000023024,ENSMUSP00000023610,ENSMUSP00000023779,…	Ablim1,Acox2,Acrbp,Adamts1,Adm,Adra2a,Agt,Akap5,Akr1b3,Akr1c18,Amigo3,Ank3,Ankrd1,Areg,Arnt2,Blnk,Btg2,C1s1,Cck,Ccl2,Ccna2,Ccr7,Cd300lb,Cd53,Cited2,Cox17,Creb5,Csrnp1,Ctgf,Cxcl1,Daam2,Dbp,Dnmt3l,Dusp1,Dusp6,Eda2r,Egr1,Egr2,Egr3,Epha1,Epha2,Etv1,Fas,Flrt1,Fos,Fosl1,Gpr110,Gpr68,Hbegf,Hebp2,Hspa1l,Ier2,Ier3,Il17c,Inpp5d,Islr2,Jun,Junb,Klf2,Klf6,Lif,Mapk15,Mmp9,Nfkbiz,Nppb,Nr1d1,Nr1d2,Nr1h4,Nr4a1,Nr…
GO:0007165	signal transduction	83	3594	2.49e-06	ENSMUSP00000000080,ENSMUSP00000000193,ENSMUSP00000000421,ENSMUSP00000003635,ENSMUSP00000006614,ENSMUSP00000016172,ENSMUSP00000017288,ENSMUSP00000020171,ENSMUSP00000021552,ENSMUSP00000021635,ENSMUSP00000021674,ENSMUSP00000022212,ENSMUSP00000023779,ENSMUSP00000025025,ENSMUSP00000025363,ENSMUSP00000025691,ENSMUSP00000026414,ENSMUSP00000026672,ENSMUSP00000026999,ENSMUSP00000029270,ENSMUSP00000029574,…	Adm,Adra2a,Agt,Akap5,Akr1b3,Akr1c18,Amotl2,Ank3,Areg,Arhgef28,Arnt2,Blnk,Cck,Ccl2,Ccna2,Ccr7,Cd160,Cd53,Celsr1,Chad,Cited2,Csf2rb,Csrnp1,Ctgf,Cxcl1,Daam2,Dgka,Dusp1,Eda2r,Egr1,Epha1,Epha2,Fas,Flrt1,Fos,Gp1ba,Gpr110,Gpr149,Gpr68,Hbegf,Ier3,Inpp5d,Jun,Klf6,Lif,Lrrc19,Mapk15,Matk,Nfkbiz,Ngef,Nppb,Nr1d1,Nr1d2,Nr1h4,Nr3c2,Nr4a1,Nr6a1,P2ry14,Paqr6,Pde8a,Pias1,Plk2,Plk3,Ppp1r15a,Ptger4,Pycard,Ramp3,Rhob…
GO:0009605	response to external stimulus	52	1794	2.87e-06	ENSMUSP00000000193,ENSMUSP00000003635,ENSMUSP00000006614,ENSMUSP00000017881,ENSMUSP00000020692,ENSMUSP00000021271,ENSMUSP00000021674,ENSMUSP00000023611,ENSMUSP00000023779,ENSMUSP00000025197,ENSMUSP00000025363,ENSMUSP00000025691,ENSMUSP00000025718,ENSMUSP00000025850,ENSMUSP00000028160,ENSMUSP00000029574,ENSMUSP00000029623,ENSMUSP00000031327,ENSMUSP00000031540,ENSMUSP00000033056,ENSMUSP00000035065,…	Ablim1,Adamts5,Adm,Ank3,Ankrd1,Btg2,Cck,Ccl2,Ccr7,Cd160,Cd300lb,Cited2,Cxcl1,Egr2,Egr3,Epha2,Etv1,Fas,Fos,Fosl1,Gbp2,Gbp3,Hbegf,Ier3,Ifit3,Jun,Junb,Kif5a,Mmp9,Nr1d1,Nr1h4,Nr4a1,Oasl1,Per1,Pkd1l3,Ptger4,Ptgs2,Ptn,Pycard,Robo2,Shank3,Slc25a25,Sp110,Tap2,Tlr2,Tnfrsf18,Tnfrsf26,Trib1,Trim30a,Usf1,Vcam1,Zfp36
GO:0051716	cellular response to stimulus	106	5142	4.08e-06	ENSMUSP00000000080,ENSMUSP00000000193,ENSMUSP00000000421,ENSMUSP00000003635,ENSMUSP00000006614,ENSMUSP00000009727,ENSMUSP00000016172,ENSMUSP00000017288,ENSMUSP00000017881,ENSMUSP00000020171,ENSMUSP00000020692,ENSMUSP00000021552,ENSMUSP00000021635,ENSMUSP00000021674,ENSMUSP00000022212,ENSMUSP00000022709,ENSMUSP00000023779,ENSMUSP00000025025,ENSMUSP00000025295,ENSMUSP00000025363,ENSMUSP00000025691,…	Adm,Adra2a,Agt,Akap5,Akr1b3,Akr1c18,Amotl2,Ank3,Ankrd1,Areg,Arhgef28,Arnt2,Blnk,Btg2,Cck,Ccl2,Ccna2,Ccr7,Cd160,Cd300lb,Cd53,Celsr1,Chad,Cited2,Csf2rb,Csrnp1,Ctgf,Cxcl1,Daam2,Dgka,Dusp1,Eda2r,Egr1,Egr2,Egr3,Epha1,Epha2,Fas,Flrt1,Fos,Fosl1,Gbp2,Gbp3,Gp1ba,Gpr110,Gpr149,Gpr68,Hbegf,Ier3,Ifit3,Inpp5d,Jam3,Jun,Junb,Kcnd3,Klf2,Klf6,Lif,Lrrc19,Mapk15,Matk,Mmp9,Nfkbiz,Ngef,Nppb,Nr1d1,Nr1d2,Nr1h4,Nr3c2,Nr…
GO:0051707	response to other organism	31	779	4.29e-06	ENSMUSP00000000193,ENSMUSP00000003635,ENSMUSP00000006614,ENSMUSP00000021674,ENSMUSP00000023611,ENSMUSP00000025197,ENSMUSP00000025691,ENSMUSP00000025718,ENSMUSP00000029623,ENSMUSP00000031327,ENSMUSP00000031540,ENSMUSP00000033056,ENSMUSP00000035065,ENSMUSP00000048736,ENSMUSP00000053092,ENSMUSP00000054938,ENSMUSP00000057815,ENSMUSP00000064680,ENSMUSP00000068834,ENSMUSP00000069505,ENSMUSP00000073913,…	Adamts5,Adm,Ankrd1,Ccl2,Ccr7,Cd160,Cd300lb,Cxcl1,Epha2,Fas,Fos,Gbp2,Gbp3,Ier3,Ifit3,Jun,Junb,Nr1d1,Nr1h4,Oasl1,Ptger4,Ptgs2,Pycard,Sp110,Tap2,Tlr2,Tnfrsf18,Tnfrsf26,Trib1,Trim30a,Zfp36
GO:0034097	response to cytokine	31	792	5.79e-06	ENSMUSP00000000080,ENSMUSP00000000193,ENSMUSP00000009727,ENSMUSP00000021552,ENSMUSP00000021674,ENSMUSP00000022709,ENSMUSP00000025295,ENSMUSP00000025691,ENSMUSP00000025718,ENSMUSP00000025850,ENSMUSP00000026999,ENSMUSP00000029623,ENSMUSP00000031327,ENSMUSP00000033056,ENSMUSP00000035065,ENSMUSP00000047844,ENSMUSP00000054938,ENSMUSP00000057563,ENSMUSP00000057815,ENSMUSP00000064680,ENSMUSP00000064823,…	Ankrd1,Ccl2,Ccr7,Chad,Csf2rb,Cxcl1,Egr1,Fas,Flrt1,Fos,Fosl1,Gbp2,Gbp3,Gp1ba,Ifit3,Jun,Junb,Klf2,Klf6,Lrrc19,Ptgs2,Pycard,Smad7,Spry2,Spry4,Syngr1,Tlr2,Tnfrsf18,Tnfrsf26,Zfp36,Zfp36l1
GO:0031960	response to corticosteroid	14	163	6.22e-06	ENSMUSP00000000193,ENSMUSP00000020171,ENSMUSP00000021552,ENSMUSP00000021635,ENSMUSP00000021674,ENSMUSP00000025025,ENSMUSP00000025691,ENSMUSP00000025850,ENSMUSP00000031325,ENSMUSP00000035065,ENSMUSP00000047968,ENSMUSP00000057815,ENSMUSP00000114074,ENSMUSP00000140890	Adm,Akr1c18,Areg,Ccl2,Ctgf,Dusp1,Fas,Fos,Fosl1,Ptgs2,S100b,Sgk1,Zfp36,Zfp36l1
GO:0010941	regulation of cell death	48	1640	7e-06	ENSMUSP00000003635,ENSMUSP00000017881,ENSMUSP00000020000,ENSMUSP00000020118,ENSMUSP00000020171,ENSMUSP00000020692,ENSMUSP00000021552,ENSMUSP00000021635,ENSMUSP00000021674,ENSMUSP00000022212,ENSMUSP00000022709,ENSMUSP00000023750,ENSMUSP00000023779,ENSMUSP00000025025,ENSMUSP00000025691,ENSMUSP00000025718,ENSMUSP00000025850,ENSMUSP00000026672,ENSMUSP00000033056,ENSMUSP00000035065,ENSMUSP00000035120,…	Acox2,Adm,Agt,Akr1b3,Akr1c18,Ankrd1,Arnt2,Btg2,Cck,Ccr7,Cited2,Ctgf,Dusp1,Dusp6,Egr1,Egr3,Faim2,Fas,Fos,Fosl1,Hebp2,Ier3,Ifit3,Inpp5d,Jun,Junb,Mmp9,Nr1h4,Nr4a1,Pde8a,Phlda1,Pias1,Plk2,Plk3,Ptgs2,Ptn,Pycard,Ramp3,Rhob,S100b,Sgk1,Sp100,Sp110,Spry2,Tnfrsf18,Tnfrsf26,Zfp36,Zfp36l1
GO:0006950	response to stress	70	2899	7.41e-06	ENSMUSP00000000193,ENSMUSP00000003635,ENSMUSP00000006614,ENSMUSP00000016172,ENSMUSP00000017881,ENSMUSP00000020118,ENSMUSP00000020171,ENSMUSP00000020692,ENSMUSP00000021552,ENSMUSP00000021635,ENSMUSP00000021674,ENSMUSP00000022368,ENSMUSP00000023611,ENSMUSP00000023750,ENSMUSP00000025025,ENSMUSP00000025363,ENSMUSP00000025691,ENSMUSP00000025718,ENSMUSP00000025850,ENSMUSP00000026999,ENSMUSP00000029270,…	Adamts5,Adm,Adra2a,Agt,Akr1b3,Akr1c18,Ankrd1,Areg,Arnt2,Btg2,C1s1,Cck,Ccl2,Ccna2,Ccr7,Cd160,Celsr1,Cited2,Ctgf,Cxcl1,Dusp1,Dusp6,Egr1,Epha2,Faim2,Fas,Fos,Fosl1,Gbp2,Gbp3,Gp1ba,H60b,Hbegf,Ier3,Ifit3,Igsf10,Il17c,Jam3,Jun,Klf2,Mapk15,Matk,Mmp9,Nfkbiz,Nppb,Nr1h4,Oasl1,Per2,Plau,Plk3,Ppp1r15a,Ptger4,Ptgs2,Ptn,Pycard,Rad52,Rhob,S100b,Sgk1,Slc30a1,Smad7,Sp110,Tlr2,Tnfrsf18,Tnfrsf26,Trib1,Trim30a,Usf1,Z…
GO:0071495	cellular response to endogenous stimulus	35	997	8.8e-06	ENSMUSP00000000193,ENSMUSP00000020171,ENSMUSP00000021552,ENSMUSP00000021635,ENSMUSP00000021674,ENSMUSP00000023779,ENSMUSP00000025025,ENSMUSP00000025718,ENSMUSP00000026672,ENSMUSP00000026999,ENSMUSP00000029270,ENSMUSP00000029623,ENSMUSP00000035065,ENSMUSP00000036203,ENSMUSP00000037042,ENSMUSP00000038405,ENSMUSP00000047518,ENSMUSP00000048736,ENSMUSP00000053092,ENSMUSP00000057815,ENSMUSP00000064680,…	Adra2a,Akr1b3,Akr1c18,Ankrd1,Ccl2,Ccna2,Cited2,Ctgf,Dusp1,Egr1,Egr3,Flrt1,Fos,Jun,Junb,Kcnd3,Klf2,Nr1d1,Nr1d2,Nr1h4,Nr3c2,Nr4a1,Nr6a1,Paqr6,Pde8a,Ptger4,Ptgs2,Ptn,Ramp3,Sgk1,Smad7,Tlr2,Usf1,Zfp36,Zfp36l1
GO:0050789	regulation of biological process	165	9594	1.04e-05	ENSMUSP00000000080,ENSMUSP00000000193,ENSMUSP00000000421,ENSMUSP00000000984,ENSMUSP00000003635,ENSMUSP00000004389,ENSMUSP00000006614,ENSMUSP00000007248,ENSMUSP00000009340,ENSMUSP00000009727,ENSMUSP00000016172,ENSMUSP00000017288,ENSMUSP00000017881,ENSMUSP00000020000,ENSMUSP00000020118,ENSMUSP00000020171,ENSMUSP00000020298,ENSMUSP00000020692,ENSMUSP00000021271,ENSMUSP00000021458,ENSMUSP00000021552,…	A4gnt,Ablim1,Acox2,Acrbp,Adam33,Adamts1,Adm,Adra2a,Agt,Akap5,Akr1b3,Akr1c18,Amigo3,Amotl2,Ank3,Ankrd1,Areg,Arhgef28,Arnt2,Blnk,Bpgm,Btg2,C1s1,Camsap3,Cck,Ccl2,Ccna2,Ccr7,Cd160,Cd300lb,Cd53,Celsr1,Chad,Cited2,Cox17,Creb5,Csf2rb,Cspg5,Csrnp1,Ctgf,Cul9,Cxcl1,Cyp3a41a,Daam2,Dbp,Dgka,Dnmt3l,Dusp1,Dusp6,Eda2r,Egr1,Egr2,Egr3,Eif4ebp3,Epha1,Epha2,Etv1,Faim2,Fam101a,Fas,Flrt1,Fos,Fosl1,Gp1ba,Gpr110,Gpr149…
GO:0048731	system development	88	4072	1.16e-05	ENSMUSP00000000193,ENSMUSP00000004389,ENSMUSP00000006614,ENSMUSP00000016172,ENSMUSP00000017881,ENSMUSP00000020102,ENSMUSP00000020171,ENSMUSP00000020692,ENSMUSP00000021458,ENSMUSP00000021552,ENSMUSP00000021674,ENSMUSP00000022212,ENSMUSP00000022368,ENSMUSP00000022709,ENSMUSP00000023610,ENSMUSP00000023611,ENSMUSP00000023750,ENSMUSP00000023779,ENSMUSP00000025363,ENSMUSP00000025691,ENSMUSP00000025718,…	Ablim1,Adamts1,Adamts5,Adm,Agt,Akap5,Akr1b3,Amigo3,Ank3,Ankrd1,Areg,Arhgef28,Arnt2,Bpgm,Btg2,Camsap3,Cck,Ccl2,Ccna2,Ccr7,Celsr1,Chad,Cited2,Creb5,Cspg5,Csrnp1,Ctgf,Daam2,Dbp,Dnmt3l,Egr1,Egr2,Egr3,Epha1,Epha2,Etv1,Faim2,Fam101a,Fas,Flrt1,Fos,Fosl1,Gcnt4,Gpr110,Gpr149,Grcc10,Hbegf,Ier2,Igsf10,Il17c,Islr2,Jam3,Jun,Junb,Kbtbd8,Kif5a,Klf2,Lif,Mmp9,Myo7a,Ngef,Nr4a1,Per2,Plau,Plk2,Ptger4,Ptgs2,Ptn,Rbm20…
GO:0050793	regulation of developmental process	62	2475	1.33e-05	ENSMUSP00000000193,ENSMUSP00000006614,ENSMUSP00000016172,ENSMUSP00000017881,ENSMUSP00000020118,ENSMUSP00000020171,ENSMUSP00000021552,ENSMUSP00000021674,ENSMUSP00000022212,ENSMUSP00000022368,ENSMUSP00000022709,ENSMUSP00000023610,ENSMUSP00000025691,ENSMUSP00000025718,ENSMUSP00000026999,ENSMUSP00000029623,ENSMUSP00000031325,ENSMUSP00000031327,ENSMUSP00000035065,ENSMUSP00000035781,ENSMUSP00000037042,…	Adamts1,Adm,Agt,Akap5,Amigo3,Ankrd1,Areg,Ccl2,Ccr7,Cd53,Celsr1,Chad,Cited2,Ctgf,Cxcl1,Daam2,Dusp6,Egr1,Egr3,Epha1,Epha2,Fam101a,Fas,Flrt1,Fos,Gpr68,Igsf10,Inpp5d,Islr2,Jun,Junb,Klf2,Lif,Mmp9,Nfkbiz,Ngef,Nr1d1,Nr1d2,Nr1h4,Per2,Pias1,Plau,Plk2,Ptger4,Ptgs2,Ptn,Rhob,Robo2,S100b,Sgk1,Shank3,Smad7,Sp100,Spry1,Spry2,Tbr1,Tlr2,Tnfrsf26,Trib1,Zfp322a,Zfp36,Zfp36l1
GO:0070848	response to growth factor	22	463	2.1e-05	ENSMUSP00000000193,ENSMUSP00000006614,ENSMUSP00000020118,ENSMUSP00000020171,ENSMUSP00000021552,ENSMUSP00000021635,ENSMUSP00000021674,ENSMUSP00000022709,ENSMUSP00000023779,ENSMUSP00000025718,ENSMUSP00000026672,ENSMUSP00000026999,ENSMUSP00000029270,ENSMUSP00000037042,ENSMUSP00000038405,ENSMUSP00000057815,ENSMUSP00000060275,ENSMUSP00000069616,ENSMUSP00000096357,ENSMUSP00000099073,ENSMUSP00000102711,…	Akr1c18,Ankrd1,Ccl2,Ccna2,Cited2,Ctgf,Dusp6,Egr1,Egr3,Epha2,Flrt1,Fos,Ier2,Jun,Kcnd3,Nr4a1,Pde8a,Ptn,Smad7,Spry2,Zfp36,Zfp36l1
GO:0050890	cognition	18	315	2.16e-05	ENSMUSP00000004389,ENSMUSP00000020692,ENSMUSP00000021674,ENSMUSP00000022212,ENSMUSP00000025850,ENSMUSP00000029623,ENSMUSP00000035065,ENSMUSP00000041053,ENSMUSP00000046787,ENSMUSP00000047968,ENSMUSP00000049380,ENSMUSP00000066488,ENSMUSP00000069616,ENSMUSP00000096248,ENSMUSP00000099073,ENSMUSP00000102711,ENSMUSP00000104932,ENSMUSP00000114074	Agt,Btg2,Egr1,Egr2,Fos,Fosl1,Gpr110,Grcc10,Jun,Pias1,Plk2,Ptgs2,Ptn,S100b,Sgk1,Shank3,Tbr1,Tlr2
GO:0007611	learning or memory	17	286	2.73e-05	ENSMUSP00000020692,ENSMUSP00000021674,ENSMUSP00000022212,ENSMUSP00000025850,ENSMUSP00000029623,ENSMUSP00000035065,ENSMUSP00000041053,ENSMUSP00000046787,ENSMUSP00000047968,ENSMUSP00000049380,ENSMUSP00000066488,ENSMUSP00000069616,ENSMUSP00000096248,ENSMUSP00000099073,ENSMUSP00000102711,ENSMUSP00000104932,ENSMUSP00000114074	Agt,Btg2,Egr1,Egr2,Fos,Fosl1,Gpr110,Jun,Pias1,Plk2,Ptgs2,Ptn,S100b,Sgk1,Shank3,Tbr1,Tlr2
GO:0048522	positive regulation of cellular process	98	4827	2.76e-05	ENSMUSP00000000080,ENSMUSP00000000193,ENSMUSP00000007248,ENSMUSP00000017881,ENSMUSP00000020000,ENSMUSP00000020118,ENSMUSP00000020171,ENSMUSP00000020298,ENSMUSP00000020692,ENSMUSP00000021271,ENSMUSP00000021552,ENSMUSP00000021635,ENSMUSP00000021674,ENSMUSP00000022212,ENSMUSP00000022368,ENSMUSP00000022709,ENSMUSP00000023024,ENSMUSP00000023610,ENSMUSP00000023779,ENSMUSP00000025025,ENSMUSP00000025363,…	Ablim1,Acox2,Acrbp,Adamts1,Adm,Adra2a,Agt,Akap5,Akr1b3,Akr1c18,Amigo3,Ank3,Ankrd1,Areg,Arnt2,Blnk,Btg2,Cck,Ccl2,Ccna2,Ccr7,Cd300lb,Cd53,Cited2,Cox17,Creb5,Csrnp1,Ctgf,Cxcl1,Daam2,Dbp,Dnmt3l,Dusp1,Dusp6,Eda2r,Egr1,Egr2,Egr3,Epha1,Etv1,Fas,Flrt1,Fos,Fosl1,Gpr68,Hbegf,Hebp2,Hspa1l,Ier2,Inpp5d,Islr2,Jun,Junb,Klf2,Klf6,Lif,Mapk15,Mmp9,Nfkbiz,Nr1d1,Nr1d2,Nr1h4,Nr4a1,Nr6a1,Pcbd1,Pde8a,Per1,Per2,Phlda1,P…
GO:0035556	intracellular signal transduction	39	1274	3.78e-05	ENSMUSP00000000421,ENSMUSP00000003635,ENSMUSP00000006614,ENSMUSP00000016172,ENSMUSP00000017288,ENSMUSP00000020171,ENSMUSP00000021552,ENSMUSP00000022212,ENSMUSP00000025025,ENSMUSP00000026414,ENSMUSP00000026999,ENSMUSP00000029270,ENSMUSP00000029574,ENSMUSP00000029623,ENSMUSP00000033056,ENSMUSP00000035121,ENSMUSP00000036203,ENSMUSP00000047518,ENSMUSP00000048148,ENSMUSP00000048736,ENSMUSP00000049380,…	Adm,Adra2a,Agt,Akr1b3,Amotl2,Arhgef28,Blnk,Ccna2,Ccr7,Celsr1,Ctgf,Dgka,Dusp1,Eda2r,Epha2,Gpr110,Ier3,Inpp5d,Jun,Lif,Mapk15,Pias1,Plk2,Plk3,Ptger4,Pycard,Ramp3,Rhob,Rnd3,Sgk1,Shank3,Smad7,Stac3,Tlr2,Trib1,Tssk3,Vcam1,Zfp36,Zfp36l1
GO:0010646	regulation of cell communication	71	3130	4.84e-05	ENSMUSP00000000193,ENSMUSP00000003635,ENSMUSP00000006614,ENSMUSP00000009727,ENSMUSP00000016172,ENSMUSP00000017881,ENSMUSP00000020118,ENSMUSP00000020171,ENSMUSP00000021271,ENSMUSP00000021635,ENSMUSP00000022212,ENSMUSP00000022368,ENSMUSP00000022709,ENSMUSP00000023750,ENSMUSP00000025025,ENSMUSP00000025295,ENSMUSP00000025363,ENSMUSP00000025691,ENSMUSP00000025718,ENSMUSP00000026672,ENSMUSP00000026999,…	Adm,Adra2a,Agt,Akap5,Akr1b3,Akr1c18,Ank3,Ankrd1,Areg,Arhgef28,Blnk,Cck,Ccl2,Ccr7,Celsr1,Chad,Cited2,Cspg5,Ctgf,Cxcl1,Daam2,Dusp1,Dusp6,Eda2r,Egr1,Egr2,Epha2,Faim2,Fas,Flrt1,Gp1ba,Gpr68,Hbegf,Ier3,Il17c,Inpp5d,Jun,Kcnc3,Lif,Lrrc19,Mmp9,Ngef,Nppb,Nr1d1,Nr1h4,Pde8a,Per1,Per2,Plau,Plk2,Pmepa1,Ptger4,Ptgs2,Ptn,Pycard,Ramp3,Robo2,S100b,Shank3,Slc30a1,Smad7,Sp100,Spry1,Spry2,Spry4,Syngr1,Tlr2,Tnfrsf18,T…
GO:0001944	vasculature development	23	533	4.89e-05	ENSMUSP00000000193,ENSMUSP00000006614,ENSMUSP00000020171,ENSMUSP00000021552,ENSMUSP00000022368,ENSMUSP00000023779,ENSMUSP00000025363,ENSMUSP00000025850,ENSMUSP00000026999,ENSMUSP00000034472,ENSMUSP00000035065,ENSMUSP00000037042,ENSMUSP00000038405,ENSMUSP00000048736,ENSMUSP00000064680,ENSMUSP00000066488,ENSMUSP00000067013,ENSMUSP00000067066,ENSMUSP00000069616,ENSMUSP00000073099,ENSMUSP00000102711,…	Adm,Agt,Ccl2,Cited2,Ctgf,Egr1,Egr3,Epha1,Epha2,Fosl1,Hbegf,Jam3,Jun,Junb,Lif,Nr4a1,Plau,Ptger4,Ptgs2,Rhob,Robo2,Smad7,Zfp36l1
GO:0010942	positive regulation of cell death	26	664	5.08e-05	ENSMUSP00000017881,ENSMUSP00000020000,ENSMUSP00000020118,ENSMUSP00000020171,ENSMUSP00000021635,ENSMUSP00000021674,ENSMUSP00000023779,ENSMUSP00000025025,ENSMUSP00000025691,ENSMUSP00000025718,ENSMUSP00000025850,ENSMUSP00000033056,ENSMUSP00000035065,ENSMUSP00000035120,ENSMUSP00000047518,ENSMUSP00000047968,ENSMUSP00000066488,ENSMUSP00000067013,ENSMUSP00000069616,ENSMUSP00000091226,ENSMUSP00000099073,…	Acox2,Adm,Agt,Akr1c18,Ankrd1,Cck,Ctgf,Dusp1,Dusp6,Egr1,Fas,Fos,Fosl1,Hebp2,Inpp5d,Jun,Mmp9,Nr4a1,Phlda1,Ptgs2,Ptn,Pycard,Ramp3,Rhob,S100b,Sp110
GO:0050794	regulation of cellular process	155	9045	5.14e-05	ENSMUSP00000000080,ENSMUSP00000000193,ENSMUSP00000000421,ENSMUSP00000000984,ENSMUSP00000003635,ENSMUSP00000006614,ENSMUSP00000007248,ENSMUSP00000009340,ENSMUSP00000009727,ENSMUSP00000016172,ENSMUSP00000017288,ENSMUSP00000017881,ENSMUSP00000020000,ENSMUSP00000020118,ENSMUSP00000020171,ENSMUSP00000020298,ENSMUSP00000020692,ENSMUSP00000021271,ENSMUSP00000021458,ENSMUSP00000021552,ENSMUSP00000021635,…	A4gnt,Ablim1,Acox2,Acrbp,Adam33,Adamts1,Adm,Adra2a,Agt,Akap5,Akr1b3,Akr1c18,Amigo3,Amotl2,Ank3,Ankrd1,Areg,Arhgef28,Arnt2,Blnk,Bpgm,Btg2,Camsap3,Cck,Ccl2,Ccna2,Ccr7,Cd160,Cd300lb,Cd53,Celsr1,Chad,Cited2,Cox17,Creb5,Csf2rb,Cspg5,Csrnp1,Ctgf,Cul9,Cxcl1,Daam2,Dbp,Dgka,Dnmt3l,Dusp1,Dusp6,Eda2r,Egr1,Egr2,Egr3,Eif4ebp3,Epha1,Epha2,Etv1,Faim2,Fam101a,Fas,Flrt1,Fos,Fosl1,Gp1ba,Gpr110,Gpr149,Gpr68,Hbegf,H…
GO:0030334	regulation of cell migration	29	805	5.52e-05	ENSMUSP00000000193,ENSMUSP00000006614,ENSMUSP00000017881,ENSMUSP00000022212,ENSMUSP00000022368,ENSMUSP00000022709,ENSMUSP00000023610,ENSMUSP00000025363,ENSMUSP00000029623,ENSMUSP00000031327,ENSMUSP00000033056,ENSMUSP00000034472,ENSMUSP00000035065,ENSMUSP00000036203,ENSMUSP00000037246,ENSMUSP00000038405,ENSMUSP00000048736,ENSMUSP00000066399,ENSMUSP00000066488,ENSMUSP00000067013,ENSMUSP00000068834,…	Adamts1,Adra2a,Agt,Camsap3,Ccl2,Ccr7,Cited2,Cxcl1,Egr1,Epha1,Epha2,Hbegf,Igsf10,Jam3,Jun,Mapk15,Mmp9,Plau,Plk2,Ptger4,Ptgs2,Ptn,Pycard,Rhob,Sp100,Spry2,Tlr2,Tnfrsf18,Trib1
GO:0065007	biological regulation	169	10168	5.94e-05	ENSMUSP00000000080,ENSMUSP00000000193,ENSMUSP00000000421,ENSMUSP00000000984,ENSMUSP00000003635,ENSMUSP00000004389,ENSMUSP00000006614,ENSMUSP00000007248,ENSMUSP00000009340,ENSMUSP00000009727,ENSMUSP00000016172,ENSMUSP00000017288,ENSMUSP00000017881,ENSMUSP00000020000,ENSMUSP00000020118,ENSMUSP00000020171,ENSMUSP00000020298,ENSMUSP00000020692,ENSMUSP00000021271,ENSMUSP00000021458,ENSMUSP00000021552,…	A4gnt,Ablim1,Acox2,Acrbp,Adam33,Adamts1,Adm,Adra2a,Agt,Akap5,Akr1b3,Akr1c18,Amigo3,Amotl2,Ank3,Ankrd1,Areg,Arhgef28,Arnt2,Blnk,Bpgm,Btg2,C1s1,Camsap3,Ccdc37,Cck,Ccl2,Ccna2,Ccr7,Cd160,Cd300lb,Cd53,Celsr1,Chad,Cited2,Cox17,Creb5,Csf2rb,Cspg5,Csrnp1,Ctgf,Cul9,Cxcl1,Cyp3a41a,Daam2,Dbp,Dgka,Dnmt3l,Dusp1,Dusp6,Eda2r,Egr1,Egr2,Egr3,Eif4ebp3,Epha1,Epha2,Etv1,Faim2,Fam101a,Fas,Flrt1,Fos,Fosl1,Gcnt4,Gp1ba,…
GO:0001568	blood vessel development	22	504	6.5e-05	ENSMUSP00000000193,ENSMUSP00000006614,ENSMUSP00000020171,ENSMUSP00000021552,ENSMUSP00000022368,ENSMUSP00000023779,ENSMUSP00000025363,ENSMUSP00000025850,ENSMUSP00000026999,ENSMUSP00000034472,ENSMUSP00000035065,ENSMUSP00000037042,ENSMUSP00000038405,ENSMUSP00000048736,ENSMUSP00000064680,ENSMUSP00000066488,ENSMUSP00000067013,ENSMUSP00000069616,ENSMUSP00000073099,ENSMUSP00000102711,ENSMUSP00000112776,…	Adm,Agt,Ccl2,Cited2,Ctgf,Egr1,Egr3,Epha1,Epha2,Fosl1,Hbegf,Jam3,Jun,Junb,Nr4a1,Plau,Ptger4,Ptgs2,Rhob,Robo2,Smad7,Zfp36l1
GO:0071345	cellular response to cytokine stimulus	26	676	6.5e-05	ENSMUSP00000000080,ENSMUSP00000000193,ENSMUSP00000009727,ENSMUSP00000021552,ENSMUSP00000022709,ENSMUSP00000025295,ENSMUSP00000025691,ENSMUSP00000025718,ENSMUSP00000026999,ENSMUSP00000029623,ENSMUSP00000031327,ENSMUSP00000033056,ENSMUSP00000047844,ENSMUSP00000054938,ENSMUSP00000057563,ENSMUSP00000057815,ENSMUSP00000064823,ENSMUSP00000069616,ENSMUSP00000094082,ENSMUSP00000099423,ENSMUSP00000099462,…	Ankrd1,Ccl2,Ccr7,Chad,Csf2rb,Cxcl1,Egr1,Fas,Flrt1,Gbp2,Gbp3,Gp1ba,Ifit3,Klf2,Klf6,Lrrc19,Pycard,Smad7,Spry2,Spry4,Syngr1,Tlr2,Tnfrsf18,Tnfrsf26,Zfp36,Zfp36l1
GO:0042981	regulation of apoptotic process	42	1476	6.93e-05	ENSMUSP00000003635,ENSMUSP00000017881,ENSMUSP00000020118,ENSMUSP00000020171,ENSMUSP00000020692,ENSMUSP00000021552,ENSMUSP00000021635,ENSMUSP00000022212,ENSMUSP00000022709,ENSMUSP00000023750,ENSMUSP00000023779,ENSMUSP00000025025,ENSMUSP00000025691,ENSMUSP00000025718,ENSMUSP00000025850,ENSMUSP00000033056,ENSMUSP00000035065,ENSMUSP00000035120,ENSMUSP00000037042,ENSMUSP00000038405,ENSMUSP00000047968,…	Adm,Agt,Akr1b3,Akr1c18,Ankrd1,Arnt2,Btg2,Cck,Ccr7,Cited2,Ctgf,Dusp1,Dusp6,Egr1,Egr3,Faim2,Fas,Fosl1,Ier3,Ifit3,Inpp5d,Jun,Mmp9,Nr1h4,Nr4a1,Phlda1,Pias1,Plk2,Plk3,Ptgs2,Ptn,Pycard,Rhob,S100b,Sgk1,Sp100,Sp110,Spry2,Tnfrsf18,Tnfrsf26,Zfp36,Zfp36l1
GO:0051094	positive regulation of developmental process	41	1423	6.93e-05	ENSMUSP00000017881,ENSMUSP00000020171,ENSMUSP00000021552,ENSMUSP00000021674,ENSMUSP00000022212,ENSMUSP00000023610,ENSMUSP00000025718,ENSMUSP00000029623,ENSMUSP00000031327,ENSMUSP00000035065,ENSMUSP00000035781,ENSMUSP00000037042,ENSMUSP00000038405,ENSMUSP00000047968,ENSMUSP00000048736,ENSMUSP00000049292,ENSMUSP00000053092,ENSMUSP00000057815,ENSMUSP00000061524,ENSMUSP00000064680,ENSMUSP00000066488,…	Adamts1,Adm,Agt,Akap5,Amigo3,Ankrd1,Ccr7,Cd53,Cited2,Ctgf,Cxcl1,Egr1,Egr3,Epha1,Flrt1,Fos,Gpr68,Inpp5d,Islr2,Jun,Junb,Lif,Mmp9,Nfkbiz,Nr1h4,Pias1,Plk2,Ptger4,Ptgs2,Ptn,Rhob,Robo2,S100b,Sgk1,Shank3,Spry1,Tlr2,Trib1,Zfp322a,Zfp36,Zfp36l1
GO:0051173	positive regulation of nitrogen compound metabolic process	66	2866	6.93e-05	ENSMUSP00000000080,ENSMUSP00000000193,ENSMUSP00000003635,ENSMUSP00000017881,ENSMUSP00000020171,ENSMUSP00000020298,ENSMUSP00000020692,ENSMUSP00000021271,ENSMUSP00000021552,ENSMUSP00000021674,ENSMUSP00000022212,ENSMUSP00000022709,ENSMUSP00000023024,ENSMUSP00000023779,ENSMUSP00000025363,ENSMUSP00000025691,ENSMUSP00000025718,ENSMUSP00000025850,ENSMUSP00000026672,ENSMUSP00000026999,ENSMUSP00000029270,…	Ablim1,Acrbp,Adra2a,Agt,Akap5,Ankrd1,Areg,Arnt2,Btg2,Cck,Ccl2,Ccna2,Ccr7,Cited2,Creb5,Csrnp1,Ctgf,Dbp,Dnmt3l,Eda2r,Egr1,Egr2,Egr3,Etv1,Fas,Fos,Fosl1,Hbegf,Ier2,Ier3,Jun,Junb,Klf2,Klf6,Lif,Mapk15,Mmp9,Nr1d1,Nr1d2,Nr1h4,Nr4a1,Nr6a1,Pcbd1,Pde8a,Per1,Per2,Pias1,Plk2,Plk3,Ppp1r15a,Ptger4,Ptgs2,Pycard,Ramp3,Rbm20,Smad7,Spry2,Tbr1,Tef,Tlr2,Tnfrsf18,Trib1,Trim30a,Usf1,Zfp36,Zfp36l1
GO:0051384	response to glucocorticoid	12	150	6.93e-05	ENSMUSP00000000193,ENSMUSP00000021552,ENSMUSP00000021674,ENSMUSP00000025025,ENSMUSP00000025691,ENSMUSP00000025850,ENSMUSP00000031325,ENSMUSP00000035065,ENSMUSP00000047968,ENSMUSP00000057815,ENSMUSP00000114074,ENSMUSP00000140890	Adm,Areg,Ccl2,Dusp1,Fas,Fos,Fosl1,Ptgs2,S100b,Sgk1,Zfp36,Zfp36l1
GO:0031325	positive regulation of cellular metabolic process	68	3004	7.78e-05	ENSMUSP00000000080,ENSMUSP00000000193,ENSMUSP00000017881,ENSMUSP00000020171,ENSMUSP00000020298,ENSMUSP00000020692,ENSMUSP00000021271,ENSMUSP00000021552,ENSMUSP00000021635,ENSMUSP00000021674,ENSMUSP00000022212,ENSMUSP00000022368,ENSMUSP00000022709,ENSMUSP00000023024,ENSMUSP00000023779,ENSMUSP00000025363,ENSMUSP00000025691,ENSMUSP00000025718,ENSMUSP00000025850,ENSMUSP00000026672,ENSMUSP00000026999,…	Ablim1,Acrbp,Adra2a,Agt,Akap5,Akr1c18,Ankrd1,Areg,Arnt2,Btg2,Cck,Ccl2,Ccna2,Ccr7,Cited2,Cox17,Creb5,Csrnp1,Ctgf,Cxcl1,Dbp,Dnmt3l,Eda2r,Egr1,Egr2,Egr3,Etv1,Fas,Fos,Fosl1,Hbegf,Ier2,Jun,Junb,Klf2,Klf6,Lif,Mapk15,Mmp9,Nr1d1,Nr1d2,Nr1h4,Nr4a1,Nr6a1,Pcbd1,Pde8a,Per1,Per2,Pias1,Plau,Plk2,Plk3,Ppp1r15a,Ptger4,Ptgs2,Pycard,Ramp3,Rbm20,Smad7,Spry2,Tbr1,Tef,Tlr2,Tnfrsf18,Trib1,Usf1,Zfp36,Zfp36l1
GO:0040012	regulation of locomotion	31	924	8.03e-05	ENSMUSP00000000193,ENSMUSP00000006614,ENSMUSP00000017881,ENSMUSP00000022212,ENSMUSP00000022368,ENSMUSP00000022709,ENSMUSP00000023610,ENSMUSP00000025363,ENSMUSP00000029623,ENSMUSP00000031327,ENSMUSP00000033056,ENSMUSP00000034472,ENSMUSP00000035065,ENSMUSP00000036203,ENSMUSP00000037246,ENSMUSP00000038405,ENSMUSP00000046787,ENSMUSP00000048736,ENSMUSP00000066399,ENSMUSP00000066488,ENSMUSP00000067013,…	Adamts1,Adra2a,Agt,Camsap3,Ccl2,Ccr7,Cited2,Cxcl1,Egr1,Epha1,Epha2,Hbegf,Igsf10,Jam3,Jun,Mapk15,Mmp9,Plau,Plk2,Ptger4,Ptgs2,Ptn,Pycard,Rhob,Robo2,Sp100,Spry2,Tbr1,Tlr2,Tnfrsf18,Trib1
GO:1901342	regulation of vasculature development	17	319	8.2e-05	ENSMUSP00000000193,ENSMUSP00000006614,ENSMUSP00000017881,ENSMUSP00000022212,ENSMUSP00000022709,ENSMUSP00000023610,ENSMUSP00000035065,ENSMUSP00000048736,ENSMUSP00000064823,ENSMUSP00000066399,ENSMUSP00000066488,ENSMUSP00000067013,ENSMUSP00000067066,ENSMUSP00000069616,ENSMUSP00000073099,ENSMUSP00000099073,ENSMUSP00000140890	Adamts1,Adm,Agt,Ccl2,Egr1,Epha1,Epha2,Klf2,Lif,Mmp9,Plk2,Ptger4,Ptgs2,Ptn,Rhob,Sp100,Spry2
GO:0048519	negative regulation of biological process	95	4771	8.26e-05	ENSMUSP00000000193,ENSMUSP00000003635,ENSMUSP00000006614,ENSMUSP00000009340,ENSMUSP00000017881,ENSMUSP00000020118,ENSMUSP00000020171,ENSMUSP00000020692,ENSMUSP00000021271,ENSMUSP00000021458,ENSMUSP00000021552,ENSMUSP00000021635,ENSMUSP00000022212,ENSMUSP00000022368,ENSMUSP00000022709,ENSMUSP00000023610,ENSMUSP00000023750,ENSMUSP00000023779,ENSMUSP00000025025,ENSMUSP00000025197,ENSMUSP00000025295,…	A4gnt,Adamts1,Adm,Adra2a,Agt,Akap5,Akr1b3,Akr1c18,Ank3,Ankrd1,Areg,Arnt2,Btg2,Camsap3,Cck,Ccl2,Ccr7,Chad,Cited2,Ctgf,Daam2,Dnmt3l,Dusp1,Dusp6,Egr1,Egr3,Eif4ebp3,Epha1,Epha2,Faim2,Fam101a,Fas,Flrt1,Fosl1,Gp1ba,Gpr149,Gpr68,Hbegf,Hist1h1d,Ier3,Ifit3,Inpp5d,Jun,Junb,Klf2,Lif,Lrrc19,Mapk15,Mmp9,Mnda,Ngef,Nppb,Nr1d1,Nr1d2,Nr1h4,Nr4a1,Nr6a1,Oasl1,Pde8a,Per1,Per2,Per3,Pias1,Plau,Plk2,Plk3,Pmepa1,Ppp1r15…
GO:0023051	regulation of signaling	70	3150	9.18e-05	ENSMUSP00000000193,ENSMUSP00000003635,ENSMUSP00000006614,ENSMUSP00000009727,ENSMUSP00000016172,ENSMUSP00000017881,ENSMUSP00000020118,ENSMUSP00000020171,ENSMUSP00000021271,ENSMUSP00000021635,ENSMUSP00000022212,ENSMUSP00000022368,ENSMUSP00000022709,ENSMUSP00000023750,ENSMUSP00000025025,ENSMUSP00000025295,ENSMUSP00000025363,ENSMUSP00000025691,ENSMUSP00000025718,ENSMUSP00000026672,ENSMUSP00000026999,…	Adm,Adra2a,Agt,Akap5,Akr1b3,Akr1c18,Ankrd1,Areg,Arhgef28,Blnk,Cck,Ccl2,Ccr7,Celsr1,Chad,Cited2,Cspg5,Ctgf,Cxcl1,Daam2,Dusp1,Dusp6,Eda2r,Egr1,Egr2,Epha2,Faim2,Fas,Flrt1,Gp1ba,Gpr68,Hbegf,Ier3,Il17c,Inpp5d,Jun,Kcnc3,Lif,Lrrc19,Mmp9,Ngef,Nppb,Nr1d1,Nr1h4,Pde8a,Per1,Per2,Plau,Plk2,Pmepa1,Ptger4,Ptgs2,Ptn,Pycard,Ramp3,Robo2,S100b,Shank3,Slc30a1,Smad7,Sp100,Spry1,Spry2,Spry4,Syngr1,Tlr2,Tnfrsf18,Trib1,…
GO:0009893	positive regulation of metabolic process	71	3215	9.26e-05	ENSMUSP00000000080,ENSMUSP00000000193,ENSMUSP00000003635,ENSMUSP00000017881,ENSMUSP00000020171,ENSMUSP00000020298,ENSMUSP00000020692,ENSMUSP00000021271,ENSMUSP00000021552,ENSMUSP00000021635,ENSMUSP00000021674,ENSMUSP00000022212,ENSMUSP00000022368,ENSMUSP00000022709,ENSMUSP00000023024,ENSMUSP00000023779,ENSMUSP00000025363,ENSMUSP00000025691,ENSMUSP00000025718,ENSMUSP00000025850,ENSMUSP00000026672,…	Ablim1,Acrbp,Adra2a,Agt,Akap5,Akr1c18,Ank3,Ankrd1,Areg,Arnt2,Btg2,Cck,Ccl2,Ccna2,Ccr7,Cited2,Cox17,Creb5,Csrnp1,Ctgf,Cxcl1,Dbp,Dnmt3l,Eda2r,Egr1,Egr2,Egr3,Etv1,Fas,Fos,Fosl1,Hbegf,Ier2,Ier3,Jun,Junb,Klf2,Klf6,Lif,Mapk15,Mmp9,Nr1d1,Nr1d2,Nr1h4,Nr4a1,Nr6a1,Pcbd1,Pde8a,Per1,Per2,Pias1,Plau,Plk2,Plk3,Ppp1r15a,Ptger4,Ptgs2,Pycard,Ramp3,Rbm20,Smad7,Spry2,Tbr1,Tef,Tlr2,Tnfrsf18,Trib1,Trim30a,Usf1,Zfp36,…
GO:0072359	circulatory system development	30	889	9.84e-05	ENSMUSP00000000193,ENSMUSP00000006614,ENSMUSP00000017881,ENSMUSP00000020171,ENSMUSP00000021552,ENSMUSP00000022368,ENSMUSP00000023610,ENSMUSP00000023779,ENSMUSP00000025363,ENSMUSP00000025718,ENSMUSP00000025850,ENSMUSP00000026999,ENSMUSP00000029574,ENSMUSP00000034472,ENSMUSP00000035065,ENSMUSP00000037042,ENSMUSP00000038405,ENSMUSP00000048736,ENSMUSP00000049292,ENSMUSP00000064680,ENSMUSP00000066488,…	Adamts1,Adm,Agt,Ankrd1,Ccl2,Cited2,Ctgf,Egr1,Egr3,Epha1,Epha2,Fosl1,Hbegf,Jam3,Jun,Junb,Lif,Mmp9,Nr4a1,Plau,Ptger4,Ptgs2,Ptn,Rbm20,Rhob,Robo2,Smad7,Spry1,Vcam1,Zfp36l1
GO:0001932	regulation of protein phosphorylation	39	1362	0.00013	ENSMUSP00000000193,ENSMUSP00000006614,ENSMUSP00000017881,ENSMUSP00000020118,ENSMUSP00000020171,ENSMUSP00000021271,ENSMUSP00000022709,ENSMUSP00000025025,ENSMUSP00000025295,ENSMUSP00000025363,ENSMUSP00000025691,ENSMUSP00000026672,ENSMUSP00000026999,ENSMUSP00000029623,ENSMUSP00000031325,ENSMUSP00000033056,ENSMUSP00000035065,ENSMUSP00000035120,ENSMUSP00000036203,ENSMUSP00000039950,ENSMUSP00000047518,…	Adra2a,Agt,Akap5,Areg,Cck,Ccl2,Ccr7,Chad,Ctgf,Dusp1,Dusp6,Eda2r,Egr1,Epha1,Epha2,Fas,Flrt1,Gp1ba,Hbegf,Jun,Lif,Lrrc19,Mapk15,Mmp9,Pde8a,Per1,Pmepa1,Ppp1r15a,Ptger4,Ptgs2,Pycard,Ramp3,Smad7,Spry1,Spry2,Spry4,Tlr2,Tnfrsf18,Trib1
GO:0007612	learning	12	165	0.00014	ENSMUSP00000020692,ENSMUSP00000021674,ENSMUSP00000025850,ENSMUSP00000029623,ENSMUSP00000035065,ENSMUSP00000046787,ENSMUSP00000066488,ENSMUSP00000096248,ENSMUSP00000099073,ENSMUSP00000102711,ENSMUSP00000104932,ENSMUSP00000114074	Agt,Btg2,Fos,Fosl1,Jun,Pias1,Ptgs2,Ptn,Sgk1,Shank3,Tbr1,Tlr2
GO:0010604	positive regulation of macromolecule metabolic process	67	3004	0.00014	ENSMUSP00000000080,ENSMUSP00000000193,ENSMUSP00000003635,ENSMUSP00000017881,ENSMUSP00000020171,ENSMUSP00000020298,ENSMUSP00000020692,ENSMUSP00000021271,ENSMUSP00000021552,ENSMUSP00000021674,ENSMUSP00000022212,ENSMUSP00000022709,ENSMUSP00000023024,ENSMUSP00000023779,ENSMUSP00000025363,ENSMUSP00000025691,ENSMUSP00000025718,ENSMUSP00000025850,ENSMUSP00000026672,ENSMUSP00000026999,ENSMUSP00000029270,…	Ablim1,Acrbp,Adra2a,Agt,Akap5,Ank3,Ankrd1,Areg,Arnt2,Btg2,Cck,Ccl2,Ccna2,Ccr7,Cited2,Creb5,Csrnp1,Ctgf,Dbp,Dnmt3l,Eda2r,Egr1,Egr2,Egr3,Etv1,Fas,Fos,Fosl1,Hbegf,Ier2,Ier3,Jun,Junb,Klf2,Klf6,Lif,Mapk15,Mmp9,Nr1d1,Nr1d2,Nr1h4,Nr4a1,Nr6a1,Pcbd1,Pde8a,Per1,Per2,Pias1,Plk2,Plk3,Ppp1r15a,Ptger4,Ptgs2,Pycard,Ramp3,Rbm20,Smad7,Spry2,Tbr1,Tef,Tlr2,Tnfrsf18,Trib1,Trim30a,Usf1,Zfp36,Zfp36l1
GO:0008284	positive regulation of cell population proliferation	30	913	0.00015	ENSMUSP00000000193,ENSMUSP00000017881,ENSMUSP00000020171,ENSMUSP00000021635,ENSMUSP00000022368,ENSMUSP00000023610,ENSMUSP00000023779,ENSMUSP00000025363,ENSMUSP00000029270,ENSMUSP00000029574,ENSMUSP00000031325,ENSMUSP00000031327,ENSMUSP00000033056,ENSMUSP00000035065,ENSMUSP00000035120,ENSMUSP00000037042,ENSMUSP00000047968,ENSMUSP00000048736,ENSMUSP00000054086,ENSMUSP00000066488,ENSMUSP00000067066,…	Adamts1,Adm,Agt,Akr1b3,Akr1c18,Areg,Arnt2,Cck,Ccl2,Ccna2,Ccr7,Cox17,Ctgf,Cxcl1,Egr1,Egr3,Epha1,Hbegf,Jun,Lif,Mapk15,Mmp9,Nr4a1,Plau,Ptger4,Ptgs2,Ptn,Pycard,S100b,Vcam1
GO:0009628	response to abiotic stimulus	33	1063	0.00015	ENSMUSP00000000193,ENSMUSP00000020171,ENSMUSP00000020692,ENSMUSP00000021271,ENSMUSP00000021552,ENSMUSP00000021674,ENSMUSP00000022368,ENSMUSP00000025025,ENSMUSP00000025691,ENSMUSP00000025718,ENSMUSP00000025850,ENSMUSP00000029270,ENSMUSP00000035065,ENSMUSP00000038405,ENSMUSP00000047968,ENSMUSP00000048736,ENSMUSP00000064680,ENSMUSP00000066488,ENSMUSP00000067013,ENSMUSP00000069616,ENSMUSP00000076130,…	Adm,Agt,Akr1b3,Ankrd1,Arnt2,Btg2,Ccl2,Ccna2,Cited2,Ctgf,Dusp1,Egr1,Etv1,Fas,Fos,Fosl1,Gpr68,Jun,Junb,Per1,Pias1,Pkd1l3,Plau,Plk3,Ptger4,Ptgs2,Ptn,Rhob,S100b,Sgk1,Shank3,Usf1,Zfp36l1
GO:0071383	cellular response to steroid hormone stimulus	12	166	0.00015	ENSMUSP00000000193,ENSMUSP00000021552,ENSMUSP00000021635,ENSMUSP00000023779,ENSMUSP00000053092,ENSMUSP00000057815,ENSMUSP00000069505,ENSMUSP00000088031,ENSMUSP00000105538,ENSMUSP00000108498,ENSMUSP00000114074,ENSMUSP00000114166	Akr1c18,Ccl2,Nr1d1,Nr1d2,Nr1h4,Nr3c2,Nr4a1,Nr6a1,Paqr6,Sgk1,Zfp36,Zfp36l1
GO:2000181	negative regulation of blood vessel morphogenesis	10	110	0.00015	ENSMUSP00000000193,ENSMUSP00000006614,ENSMUSP00000022212,ENSMUSP00000022709,ENSMUSP00000023610,ENSMUSP00000048736,ENSMUSP00000064823,ENSMUSP00000066488,ENSMUSP00000067066,ENSMUSP00000099073	Adamts1,Agt,Ccl2,Epha2,Klf2,Lif,Plk2,Ptger4,Ptn,Spry2
GO:0000302	response to reactive oxygen species	13	200	0.00016	ENSMUSP00000017881,ENSMUSP00000021635,ENSMUSP00000021674,ENSMUSP00000025025,ENSMUSP00000025850,ENSMUSP00000029270,ENSMUSP00000031325,ENSMUSP00000064823,ENSMUSP00000067013,ENSMUSP00000076130,ENSMUSP00000099423,ENSMUSP00000100045,ENSMUSP00000102711	Akr1b3,Akr1c18,Areg,Ccna2,Ccr7,Dusp1,Fos,Fosl1,Jun,Klf2,Mmp9,Plk3,Rhob
GO:0007565	female pregnancy	12	170	0.00017	ENSMUSP00000000193,ENSMUSP00000017881,ENSMUSP00000021635,ENSMUSP00000021674,ENSMUSP00000025850,ENSMUSP00000035065,ENSMUSP00000036203,ENSMUSP00000038405,ENSMUSP00000064680,ENSMUSP00000067066,ENSMUSP00000100045,ENSMUSP00000140890	Adm,Adra2a,Akr1b3,Akr1c18,Ccl2,Cited2,Fos,Fosl1,Junb,Lif,Mmp9,Ptgs2
GO:0071396	cellular response to lipid	20	464	0.00017	ENSMUSP00000000193,ENSMUSP00000021552,ENSMUSP00000021635,ENSMUSP00000023779,ENSMUSP00000025718,ENSMUSP00000029270,ENSMUSP00000033056,ENSMUSP00000047518,ENSMUSP00000048736,ENSMUSP00000053092,ENSMUSP00000057815,ENSMUSP00000069505,ENSMUSP00000073913,ENSMUSP00000088031,ENSMUSP00000099073,ENSMUSP00000105538,ENSMUSP00000108498,ENSMUSP00000114074,ENSMUSP00000114166,ENSMUSP00000132435	Akr1c18,Ankrd1,Ccl2,Ccna2,Cd300lb,Gbp2,Nr1d1,Nr1d2,Nr1h4,Nr3c2,Nr4a1,Nr6a1,Paqr6,Ptger4,Ptn,Pycard,Ramp3,Sgk1,Zfp36,Zfp36l1
GO:0031323	regulation of cellular metabolic process	101	5293	0.00018	ENSMUSP00000000080,ENSMUSP00000000193,ENSMUSP00000000984,ENSMUSP00000003635,ENSMUSP00000006614,ENSMUSP00000009340,ENSMUSP00000017881,ENSMUSP00000020118,ENSMUSP00000020171,ENSMUSP00000020298,ENSMUSP00000020692,ENSMUSP00000021271,ENSMUSP00000021552,ENSMUSP00000021635,ENSMUSP00000021674,ENSMUSP00000022212,ENSMUSP00000022368,ENSMUSP00000022709,ENSMUSP00000023024,ENSMUSP00000023779,ENSMUSP00000025025,…	Ablim1,Acrbp,Adam33,Adra2a,Agt,Akap5,Akr1c18,Ankrd1,Areg,Arnt2,Bpgm,Btg2,Camsap3,Cck,Ccl2,Ccna2,Ccr7,Chad,Cited2,Cox17,Creb5,Csrnp1,Ctgf,Cxcl1,Dbp,Dnmt3l,Dusp1,Dusp6,Eda2r,Egr1,Egr2,Egr3,Eif4ebp3,Epha1,Epha2,Etv1,Fas,Flrt1,Fos,Fosl1,Gp1ba,Gpr110,Hbegf,Hist1h1d,Ier2,Ier3,Inpp5d,Jun,Junb,Kbtbd8,Klf2,Klf6,Lif,Lrrc19,Mapk15,Mmp9,Mnda,Nfkbiz,Nr1d1,Nr1d2,Nr1h4,Nr3c2,Nr4a1,Nr6a1,Pcbd1,Pde8a,Per1,Per2,Pe…
GO:0070482	response to oxygen levels	16	307	0.00018	ENSMUSP00000000193,ENSMUSP00000020171,ENSMUSP00000021552,ENSMUSP00000022368,ENSMUSP00000025691,ENSMUSP00000025718,ENSMUSP00000029270,ENSMUSP00000035065,ENSMUSP00000038405,ENSMUSP00000047968,ENSMUSP00000069616,ENSMUSP00000076130,ENSMUSP00000082154,ENSMUSP00000099073,ENSMUSP00000125729,ENSMUSP00000140890	Adm,Ankrd1,Arnt2,Ccl2,Ccna2,Cited2,Ctgf,Egr1,Fas,Plau,Plk3,Ptgs2,Ptn,S100b,Usf1,Zfp36l1
GO:0051270	regulation of cellular component movement	30	928	0.00019	ENSMUSP00000000193,ENSMUSP00000006614,ENSMUSP00000017881,ENSMUSP00000022212,ENSMUSP00000022368,ENSMUSP00000022709,ENSMUSP00000023610,ENSMUSP00000025363,ENSMUSP00000029623,ENSMUSP00000031327,ENSMUSP00000033056,ENSMUSP00000034472,ENSMUSP00000035065,ENSMUSP00000036203,ENSMUSP00000037246,ENSMUSP00000038405,ENSMUSP00000046787,ENSMUSP00000048736,ENSMUSP00000066399,ENSMUSP00000066488,ENSMUSP00000067013,…	Adamts1,Adra2a,Agt,Camsap3,Ccl2,Ccr7,Cited2,Cxcl1,Egr1,Epha1,Epha2,Hbegf,Igsf10,Jam3,Jun,Mapk15,Mmp9,Plau,Plk2,Ptger4,Ptgs2,Ptn,Pycard,Rhob,Sp100,Spry2,Tbr1,Tlr2,Tnfrsf18,Trib1
GO:0032870	cellular response to hormone stimulus	21	513	0.0002	ENSMUSP00000000193,ENSMUSP00000021552,ENSMUSP00000021635,ENSMUSP00000021674,ENSMUSP00000023779,ENSMUSP00000025025,ENSMUSP00000029270,ENSMUSP00000036203,ENSMUSP00000047518,ENSMUSP00000048736,ENSMUSP00000053092,ENSMUSP00000057815,ENSMUSP00000064680,ENSMUSP00000069505,ENSMUSP00000088031,ENSMUSP00000102711,ENSMUSP00000105538,ENSMUSP00000108498,ENSMUSP00000114074,ENSMUSP00000114166,ENSMUSP00000125729	Adra2a,Akr1c18,Ccl2,Ccna2,Dusp1,Fos,Jun,Junb,Nr1d1,Nr1d2,Nr1h4,Nr3c2,Nr4a1,Nr6a1,Paqr6,Ptger4,Ramp3,Sgk1,Usf1,Zfp36,Zfp36l1
GO:0051241	negative regulation of multicellular organismal process	35	1191	0.00021	ENSMUSP00000000193,ENSMUSP00000006614,ENSMUSP00000021552,ENSMUSP00000022212,ENSMUSP00000022368,ENSMUSP00000022709,ENSMUSP00000023610,ENSMUSP00000026999,ENSMUSP00000029623,ENSMUSP00000031325,ENSMUSP00000033056,ENSMUSP00000035065,ENSMUSP00000036203,ENSMUSP00000038405,ENSMUSP00000047844,ENSMUSP00000047968,ENSMUSP00000048230,ENSMUSP00000048736,ENSMUSP00000052085,ENSMUSP00000053092,ENSMUSP00000054938,…	Adamts1,Adm,Adra2a,Agt,Areg,Ccl2,Chad,Cited2,Daam2,Epha2,Fam101a,Gp1ba,Gpr149,Gpr68,Inpp5d,Klf2,Lif,Ngef,Nr1h4,Plau,Plk2,Ptger4,Ptgs2,Ptn,Pycard,S100b,Smad7,Sp100,Spry2,Tlr2,Tnfrsf26,Trib1,Trim30a,Zfp36,Zfp36l1
GO:0042325	regulation of phosphorylation	40	1466	0.00023	ENSMUSP00000000193,ENSMUSP00000003635,ENSMUSP00000006614,ENSMUSP00000017881,ENSMUSP00000020118,ENSMUSP00000020171,ENSMUSP00000021271,ENSMUSP00000022709,ENSMUSP00000025025,ENSMUSP00000025295,ENSMUSP00000025363,ENSMUSP00000025691,ENSMUSP00000026672,ENSMUSP00000026999,ENSMUSP00000029623,ENSMUSP00000031325,ENSMUSP00000033056,ENSMUSP00000035065,ENSMUSP00000035120,ENSMUSP00000036203,ENSMUSP00000039950,…	Adra2a,Agt,Akap5,Areg,Cck,Ccl2,Ccr7,Chad,Ctgf,Dusp1,Dusp6,Eda2r,Egr1,Epha1,Epha2,Fas,Flrt1,Gp1ba,Hbegf,Ier3,Jun,Lif,Lrrc19,Mapk15,Mmp9,Pde8a,Per1,Pmepa1,Ppp1r15a,Ptger4,Ptgs2,Pycard,Ramp3,Smad7,Spry1,Spry2,Spry4,Tlr2,Tnfrsf18,Trib1
GO:0048511	rhythmic process	15	279	0.00023	ENSMUSP00000021271,ENSMUSP00000023024,ENSMUSP00000023610,ENSMUSP00000025691,ENSMUSP00000041053,ENSMUSP00000060893,ENSMUSP00000066488,ENSMUSP00000066620,ENSMUSP00000069505,ENSMUSP00000069616,ENSMUSP00000079693,ENSMUSP00000088031,ENSMUSP00000099073,ENSMUSP00000099493,ENSMUSP00000102711	Adamts1,Agt,Dbp,Egr1,Egr2,Fas,Gpr149,Jun,Nr1d1,Nr1d2,Per1,Per2,Per3,Ptn,Tef
GO:0048646	anatomical structure formation involved in morphogenesis	29	890	0.00023	ENSMUSP00000000193,ENSMUSP00000006614,ENSMUSP00000016172,ENSMUSP00000016315,ENSMUSP00000017881,ENSMUSP00000020171,ENSMUSP00000022327,ENSMUSP00000022368,ENSMUSP00000023610,ENSMUSP00000023750,ENSMUSP00000023779,ENSMUSP00000025025,ENSMUSP00000025363,ENSMUSP00000029623,ENSMUSP00000032107,ENSMUSP00000034472,ENSMUSP00000035065,ENSMUSP00000037042,ENSMUSP00000038405,ENSMUSP00000041053,ENSMUSP00000046787,…	Adamts1,Adm,Ccl2,Ccnb1ip1,Celsr1,Cited2,Ctgf,Dusp1,Egr2,Egr3,Epha1,Epha2,Faim2,Hbegf,Jam3,Jun,Junb,Kbtbd8,Lamb3,Ldb3,Mmp9,Nr4a1,Plau,Ptgs2,Rhob,Robo2,Shank3,Tbr1,Tlr2
GO:0071363	cellular response to growth factor stimulus	19	437	0.00024	ENSMUSP00000000193,ENSMUSP00000020171,ENSMUSP00000021552,ENSMUSP00000021635,ENSMUSP00000021674,ENSMUSP00000022709,ENSMUSP00000023779,ENSMUSP00000025718,ENSMUSP00000026672,ENSMUSP00000026999,ENSMUSP00000029270,ENSMUSP00000037042,ENSMUSP00000038405,ENSMUSP00000057815,ENSMUSP00000069616,ENSMUSP00000096357,ENSMUSP00000099073,ENSMUSP00000102711,ENSMUSP00000109010	Akr1c18,Ankrd1,Ccl2,Ccna2,Cited2,Ctgf,Egr1,Egr3,Flrt1,Fos,Jun,Kcnd3,Nr4a1,Pde8a,Ptn,Smad7,Spry2,Zfp36,Zfp36l1
GO:0051240	positive regulation of multicellular organismal process	44	1695	0.00025	ENSMUSP00000000193,ENSMUSP00000017881,ENSMUSP00000020171,ENSMUSP00000021552,ENSMUSP00000021674,ENSMUSP00000022212,ENSMUSP00000022368,ENSMUSP00000023610,ENSMUSP00000025363,ENSMUSP00000025718,ENSMUSP00000029623,ENSMUSP00000031327,ENSMUSP00000033056,ENSMUSP00000035065,ENSMUSP00000036203,ENSMUSP00000037042,ENSMUSP00000038405,ENSMUSP00000047968,ENSMUSP00000048736,ENSMUSP00000049292,ENSMUSP00000053092,…	Adamts1,Adm,Adra2a,Agt,Akap5,Amigo3,Ankrd1,Ccl2,Ccr7,Cited2,Ctgf,Cxcl1,Egr1,Egr3,Epha1,Flrt1,Fos,Gpr68,Hbegf,Il17c,Inpp5d,Islr2,Jun,Lif,Mmp9,Nfkbiz,Nppb,Nr1h4,Plau,Plk2,Ptger4,Ptgs2,Ptn,Pycard,Rhob,Robo2,S100b,Sgk1,Shank3,Spry1,Tlr2,Trib1,Zfp322a,Zfp36l1
GO:0019220	regulation of phosphate metabolic process	43	1650	0.00029	ENSMUSP00000000193,ENSMUSP00000003635,ENSMUSP00000006614,ENSMUSP00000017881,ENSMUSP00000020118,ENSMUSP00000020171,ENSMUSP00000021271,ENSMUSP00000022709,ENSMUSP00000025025,ENSMUSP00000025295,ENSMUSP00000025363,ENSMUSP00000025691,ENSMUSP00000026672,ENSMUSP00000026999,ENSMUSP00000029623,ENSMUSP00000031325,ENSMUSP00000033056,ENSMUSP00000035065,ENSMUSP00000035120,ENSMUSP00000036203,ENSMUSP00000039950,…	Adra2a,Agt,Akap5,Areg,Bpgm,Camsap3,Cck,Ccl2,Ccr7,Chad,Ctgf,Dusp1,Dusp6,Eda2r,Egr1,Epha1,Epha2,Fas,Flrt1,Gp1ba,Hbegf,Ier3,Jun,Lif,Lrrc19,Mapk15,Mmp9,Nr1h4,Pde8a,Per1,Pmepa1,Ppp1r15a,Ptger4,Ptgs2,Pycard,Ramp3,Smad7,Spry1,Spry2,Spry4,Tlr2,Tnfrsf18,Trib1
GO:0022008	neurogenesis	43	1650	0.00029	ENSMUSP00000000193,ENSMUSP00000004389,ENSMUSP00000006614,ENSMUSP00000016172,ENSMUSP00000020692,ENSMUSP00000022212,ENSMUSP00000023610,ENSMUSP00000023750,ENSMUSP00000025691,ENSMUSP00000025718,ENSMUSP00000029623,ENSMUSP00000031325,ENSMUSP00000034472,ENSMUSP00000035120,ENSMUSP00000037246,ENSMUSP00000041053,ENSMUSP00000046787,ENSMUSP00000047968,ENSMUSP00000049380,ENSMUSP00000052085,ENSMUSP00000054938,…	Ablim1,Adamts1,Adm,Agt,Akap5,Ank3,Ankrd1,Areg,Arhgef28,Btg2,Camsap3,Cck,Ccl2,Celsr1,Daam2,Egr2,Epha2,Etv1,Faim2,Fas,Flrt1,Gpr110,Grcc10,Ier2,Igsf10,Islr2,Jam3,Jun,Kif5a,Lif,Myo7a,Ngef,Per2,Plk2,Ptn,Robo2,Rpgrip1,S100b,Sgk1,Shank3,Tbr1,Tlr2,Tnfrsf26
GO:0022603	regulation of anatomical structure morphogenesis	31	1009	0.00029	ENSMUSP00000000193,ENSMUSP00000006614,ENSMUSP00000016172,ENSMUSP00000017881,ENSMUSP00000020118,ENSMUSP00000022212,ENSMUSP00000022368,ENSMUSP00000022709,ENSMUSP00000023610,ENSMUSP00000035065,ENSMUSP00000035781,ENSMUSP00000038405,ENSMUSP00000046787,ENSMUSP00000047844,ENSMUSP00000047968,ENSMUSP00000048736,ENSMUSP00000049292,ENSMUSP00000064823,ENSMUSP00000066399,ENSMUSP00000066488,ENSMUSP00000066894,…	Adamts1,Adm,Agt,Akap5,Ccl2,Cd53,Celsr1,Chad,Cited2,Dusp6,Epha1,Epha2,Islr2,Klf2,Lif,Mmp9,Ngef,Plau,Plk2,Ptger4,Ptgs2,Ptn,Rhob,Robo2,S100b,Sgk1,Shank3,Sp100,Spry1,Spry2,Tbr1
GO:0036293	response to decreased oxygen levels	15	288	0.00029	ENSMUSP00000000193,ENSMUSP00000020171,ENSMUSP00000021552,ENSMUSP00000022368,ENSMUSP00000025718,ENSMUSP00000029270,ENSMUSP00000035065,ENSMUSP00000038405,ENSMUSP00000047968,ENSMUSP00000069616,ENSMUSP00000076130,ENSMUSP00000082154,ENSMUSP00000099073,ENSMUSP00000125729,ENSMUSP00000140890	Adm,Ankrd1,Arnt2,Ccl2,Ccna2,Cited2,Ctgf,Egr1,Plau,Plk3,Ptgs2,Ptn,S100b,Usf1,Zfp36l1
GO:0045765	regulation of angiogenesis	15	287	0.00029	ENSMUSP00000000193,ENSMUSP00000006614,ENSMUSP00000017881,ENSMUSP00000022212,ENSMUSP00000022709,ENSMUSP00000023610,ENSMUSP00000035065,ENSMUSP00000064823,ENSMUSP00000066399,ENSMUSP00000066488,ENSMUSP00000067013,ENSMUSP00000067066,ENSMUSP00000073099,ENSMUSP00000099073,ENSMUSP00000140890	Adamts1,Adm,Agt,Ccl2,Epha1,Epha2,Klf2,Lif,Mmp9,Plk2,Ptgs2,Ptn,Rhob,Sp100,Spry2
GO:0048523	negative regulation of cellular process	86	4336	0.00029	ENSMUSP00000003635,ENSMUSP00000006614,ENSMUSP00000009340,ENSMUSP00000017881,ENSMUSP00000020118,ENSMUSP00000020171,ENSMUSP00000020692,ENSMUSP00000021271,ENSMUSP00000021458,ENSMUSP00000021552,ENSMUSP00000021635,ENSMUSP00000022212,ENSMUSP00000022709,ENSMUSP00000023750,ENSMUSP00000023779,ENSMUSP00000025025,ENSMUSP00000025295,ENSMUSP00000025363,ENSMUSP00000025691,ENSMUSP00000025718,ENSMUSP00000025850,…	A4gnt,Adm,Adra2a,Agt,Akr1b3,Akr1c18,Ank3,Ankrd1,Areg,Arnt2,Btg2,Camsap3,Ccr7,Chad,Cited2,Ctgf,Daam2,Dnmt3l,Dusp1,Dusp6,Egr1,Egr3,Eif4ebp3,Epha1,Epha2,Faim2,Fam101a,Fas,Flrt1,Fosl1,Gp1ba,Gpr68,Hbegf,Hist1h1d,Ier3,Ifit3,Inpp5d,Jun,Junb,Klf2,Lif,Lrrc19,Mapk15,Mmp9,Mnda,Ngef,Nppb,Nr1d1,Nr1d2,Nr1h4,Nr4a1,Nr6a1,Pde8a,Per1,Per2,Per3,Pias1,Plk2,Plk3,Pmepa1,Ppp1r15a,Ptger4,Ptgs2,Ptn,Pycard,Ramp3,Rhob,S100…
GO:0048583	regulation of response to stimulus	74	3552	0.00029	ENSMUSP00000000193,ENSMUSP00000003635,ENSMUSP00000006614,ENSMUSP00000017881,ENSMUSP00000020118,ENSMUSP00000020171,ENSMUSP00000021271,ENSMUSP00000021635,ENSMUSP00000022212,ENSMUSP00000022368,ENSMUSP00000022709,ENSMUSP00000023750,ENSMUSP00000025025,ENSMUSP00000025197,ENSMUSP00000025295,ENSMUSP00000025363,ENSMUSP00000025691,ENSMUSP00000025718,ENSMUSP00000026672,ENSMUSP00000026999,ENSMUSP00000029623,…	Acox2,Adm,Adra2a,Agt,Akap5,Akr1b3,Akr1c18,Ankrd1,Areg,Arhgef28,Blnk,C1s1,Cck,Ccl2,Ccr7,Chad,Cited2,Ctgf,Cxcl1,Daam2,Dusp1,Dusp6,Eda2r,Egr1,Epha2,Faim2,Fas,Flrt1,Gp1ba,Gpr68,Hbegf,Ier3,Il17c,Inpp5d,Jam3,Jun,Lif,Lrrc19,Mmp9,Nfkbiz,Ngef,Nppb,Nr1d1,Nr1d2,Nr1h4,Pde8a,Per1,Per2,Plau,Plk2,Pmepa1,Ppp1r15a,Ptger4,Ptgs2,Ptn,Pycard,Rad52,Ramp3,Robo2,S100b,Shank3,Smad7,Sp100,Spry1,Spry2,Spry4,Tap2,Tbr1,Tlr2,…
GO:0048699	generation of neurons	41	1538	0.00029	ENSMUSP00000004389,ENSMUSP00000006614,ENSMUSP00000016172,ENSMUSP00000020692,ENSMUSP00000022212,ENSMUSP00000023610,ENSMUSP00000023750,ENSMUSP00000025691,ENSMUSP00000025718,ENSMUSP00000029623,ENSMUSP00000031325,ENSMUSP00000034472,ENSMUSP00000035120,ENSMUSP00000037246,ENSMUSP00000041053,ENSMUSP00000046787,ENSMUSP00000049380,ENSMUSP00000052085,ENSMUSP00000054938,ENSMUSP00000060275,ENSMUSP00000066488,…	Ablim1,Adamts1,Adm,Agt,Akap5,Ank3,Ankrd1,Areg,Arhgef28,Btg2,Camsap3,Cck,Celsr1,Daam2,Egr2,Epha2,Etv1,Faim2,Fas,Flrt1,Gpr110,Grcc10,Ier2,Igsf10,Islr2,Jam3,Jun,Kif5a,Lif,Myo7a,Ngef,Per2,Plk2,Ptn,Robo2,Rpgrip1,Sgk1,Shank3,Tbr1,Tlr2,Tnfrsf26
GO:0035295	tube development	29	912	0.0003	ENSMUSP00000000193,ENSMUSP00000006614,ENSMUSP00000016172,ENSMUSP00000020171,ENSMUSP00000021552,ENSMUSP00000022368,ENSMUSP00000022709,ENSMUSP00000023779,ENSMUSP00000025363,ENSMUSP00000026999,ENSMUSP00000031325,ENSMUSP00000034472,ENSMUSP00000035065,ENSMUSP00000037042,ENSMUSP00000038405,ENSMUSP00000048736,ENSMUSP00000049292,ENSMUSP00000064680,ENSMUSP00000064823,ENSMUSP00000066488,ENSMUSP00000067013,…	Adm,Agt,Akr1b3,Areg,Ccl2,Celsr1,Cited2,Ctgf,Egr3,Epha1,Epha2,Hbegf,Jam3,Jun,Junb,Klf2,Lif,Nr4a1,Plau,Ptger4,Ptgs2,Ptn,Rhob,Robo2,Shank3,Smad7,Spry1,Spry2,Zfp36l1
GO:0048514	blood vessel morphogenesis	18	406	0.0003	ENSMUSP00000000193,ENSMUSP00000006614,ENSMUSP00000020171,ENSMUSP00000021552,ENSMUSP00000022368,ENSMUSP00000023779,ENSMUSP00000025363,ENSMUSP00000026999,ENSMUSP00000034472,ENSMUSP00000035065,ENSMUSP00000037042,ENSMUSP00000038405,ENSMUSP00000048736,ENSMUSP00000064680,ENSMUSP00000067013,ENSMUSP00000073099,ENSMUSP00000102711,ENSMUSP00000140890	Adm,Ccl2,Cited2,Ctgf,Egr3,Epha1,Epha2,Hbegf,Jam3,Jun,Junb,Nr4a1,Plau,Ptger4,Ptgs2,Rhob,Smad7,Zfp36l1
GO:0009612	response to mechanical stimulus	13	219	0.00031	ENSMUSP00000000193,ENSMUSP00000020692,ENSMUSP00000021674,ENSMUSP00000025718,ENSMUSP00000025850,ENSMUSP00000035065,ENSMUSP00000038405,ENSMUSP00000048736,ENSMUSP00000064680,ENSMUSP00000093442,ENSMUSP00000102711,ENSMUSP00000104865,ENSMUSP00000104932	Ankrd1,Btg2,Ccl2,Cited2,Etv1,Fos,Fosl1,Jun,Junb,Pkd1l3,Ptger4,Ptgs2,Shank3
GO:0080090	regulation of primary metabolic process	98	5184	0.00033	ENSMUSP00000000080,ENSMUSP00000000193,ENSMUSP00000000984,ENSMUSP00000003635,ENSMUSP00000006614,ENSMUSP00000009340,ENSMUSP00000017881,ENSMUSP00000020118,ENSMUSP00000020171,ENSMUSP00000020298,ENSMUSP00000020692,ENSMUSP00000021271,ENSMUSP00000021552,ENSMUSP00000021635,ENSMUSP00000021674,ENSMUSP00000022212,ENSMUSP00000022709,ENSMUSP00000023024,ENSMUSP00000023779,ENSMUSP00000025025,ENSMUSP00000025295,…	Ablim1,Acrbp,Adam33,Adra2a,Agt,Akap5,Akr1c18,Ankrd1,Areg,Arnt2,Bpgm,Btg2,Cck,Ccl2,Ccna2,Ccr7,Chad,Cited2,Creb5,Csrnp1,Ctgf,Dbp,Dnmt3l,Dusp1,Dusp6,Eda2r,Egr1,Egr2,Egr3,Eif4ebp3,Epha1,Epha2,Etv1,Fas,Flrt1,Fos,Fosl1,Gp1ba,Gpr110,Hbegf,Hist1h1d,Ier2,Ier3,Inpp5d,Jun,Junb,Kbtbd8,Klf2,Klf6,Lif,Lrrc19,Mapk15,Mmp9,Mnda,Nfkbiz,Nr1d1,Nr1d2,Nr1h4,Nr3c2,Nr4a1,Nr6a1,Pcbd1,Pde8a,Per1,Per2,Per3,Pias1,Plk2,Plk3,P…
GO:0051171	regulation of nitrogen compound metabolic process	96	5052	0.00034	ENSMUSP00000000080,ENSMUSP00000000193,ENSMUSP00000000984,ENSMUSP00000003635,ENSMUSP00000006614,ENSMUSP00000009340,ENSMUSP00000017881,ENSMUSP00000020118,ENSMUSP00000020171,ENSMUSP00000020298,ENSMUSP00000020692,ENSMUSP00000021271,ENSMUSP00000021552,ENSMUSP00000021674,ENSMUSP00000022212,ENSMUSP00000022709,ENSMUSP00000023024,ENSMUSP00000023779,ENSMUSP00000025025,ENSMUSP00000025295,ENSMUSP00000025363,…	Ablim1,Acrbp,Adam33,Adra2a,Agt,Akap5,Ankrd1,Areg,Arnt2,Bpgm,Btg2,Cck,Ccl2,Ccna2,Ccr7,Chad,Cited2,Creb5,Csrnp1,Ctgf,Dbp,Dnmt3l,Dusp1,Dusp6,Eda2r,Egr1,Egr2,Egr3,Eif4ebp3,Epha1,Epha2,Etv1,Fas,Flrt1,Fos,Fosl1,Gp1ba,Gpr110,Hbegf,Hist1h1d,Ier2,Ier3,Inpp5d,Jun,Junb,Kbtbd8,Klf2,Klf6,Lif,Lrrc19,Mapk15,Mmp9,Mnda,Nfkbiz,Nr1d1,Nr1d2,Nr1h4,Nr3c2,Nr4a1,Nr6a1,Pcbd1,Pde8a,Per1,Per2,Per3,Pias1,Plk2,Plk3,Pmepa1,Pp…
GO:0019222	regulation of metabolic process	104	5616	0.00035	ENSMUSP00000000080,ENSMUSP00000000193,ENSMUSP00000000984,ENSMUSP00000003635,ENSMUSP00000006614,ENSMUSP00000009340,ENSMUSP00000017881,ENSMUSP00000020118,ENSMUSP00000020171,ENSMUSP00000020298,ENSMUSP00000020692,ENSMUSP00000021271,ENSMUSP00000021552,ENSMUSP00000021635,ENSMUSP00000021674,ENSMUSP00000022212,ENSMUSP00000022368,ENSMUSP00000022709,ENSMUSP00000023024,ENSMUSP00000023779,ENSMUSP00000025025,…	Ablim1,Acrbp,Adam33,Adra2a,Agt,Akap5,Akr1c18,Ank3,Ankrd1,Areg,Arnt2,Bpgm,Btg2,Camsap3,Cck,Ccl2,Ccna2,Ccr7,Chad,Cited2,Cox17,Creb5,Csrnp1,Ctgf,Cxcl1,Cyp3a41a,Dbp,Dnmt3l,Dusp1,Dusp6,Eda2r,Egr1,Egr2,Egr3,Eif4ebp3,Epha1,Epha2,Etv1,Fas,Flrt1,Fos,Fosl1,Gp1ba,Gpr110,Hbegf,Hist1h1d,Ier2,Ier3,Inpp5d,Jun,Junb,Kbtbd8,Klf2,Klf6,Lif,Lrrc19,Mapk15,Mmp9,Mnda,Nfkbiz,Nr1d1,Nr1d2,Nr1h4,Nr3c2,Nr4a1,Nr6a1,Pcbd1,Pde8…
GO:0030335	positive regulation of cell migration	20	500	0.00037	ENSMUSP00000000193,ENSMUSP00000017881,ENSMUSP00000022212,ENSMUSP00000022368,ENSMUSP00000022709,ENSMUSP00000023610,ENSMUSP00000025363,ENSMUSP00000029623,ENSMUSP00000031327,ENSMUSP00000033056,ENSMUSP00000035065,ENSMUSP00000036203,ENSMUSP00000048736,ENSMUSP00000066488,ENSMUSP00000067013,ENSMUSP00000069616,ENSMUSP00000073099,ENSMUSP00000099423,ENSMUSP00000099462,ENSMUSP00000102711	Adamts1,Adra2a,Agt,Ccl2,Ccr7,Cxcl1,Egr1,Epha1,Hbegf,Jun,Mmp9,Plau,Plk2,Ptger4,Ptgs2,Pycard,Rhob,Spry2,Tlr2,Tnfrsf18
GO:0032879	regulation of localization	58	2579	0.00042	ENSMUSP00000000193,ENSMUSP00000003635,ENSMUSP00000006614,ENSMUSP00000007248,ENSMUSP00000016172,ENSMUSP00000017881,ENSMUSP00000021271,ENSMUSP00000021552,ENSMUSP00000022212,ENSMUSP00000022368,ENSMUSP00000022709,ENSMUSP00000023610,ENSMUSP00000025363,ENSMUSP00000025718,ENSMUSP00000029623,ENSMUSP00000030674,ENSMUSP00000031327,ENSMUSP00000033056,ENSMUSP00000034472,ENSMUSP00000035065,ENSMUSP00000035120,…	Adamts1,Adra2a,Agt,Akap5,Ank3,Ankrd1,Camsap3,Cck,Ccl2,Ccr7,Celsr1,Cited2,Cox17,Cxcl1,Egr1,Epha1,Epha2,Gpr68,Hbegf,Hspa1l,Ier3,Igsf10,Jam3,Jun,Kcnc3,Kcnd3,Kcnk7,Lif,Mapk15,Mest,Mmp9,Nppb,Nr1d1,Nr1h4,Per1,Per2,Plau,Plk2,Plk3,Ptger4,Ptgs2,Ptn,Pycard,Ramp3,Rhob,Sgk1,Shank3,Slc30a1,Sp100,Spry2,Stac3,Sytl1,Tbr1,Tlr2,Tnfrsf18,Trib1,Zfp36,Zfp36l1
GO:0046683	response to organophosphorus	10	130	0.00042	ENSMUSP00000000193,ENSMUSP00000021271,ENSMUSP00000021552,ENSMUSP00000021674,ENSMUSP00000025025,ENSMUSP00000025850,ENSMUSP00000031325,ENSMUSP00000035065,ENSMUSP00000064680,ENSMUSP00000102711	Areg,Ccl2,Dusp1,Fos,Fosl1,Jun,Junb,Per1,Ptgs2,Zfp36l1
GO:0035239	tube morphogenesis	24	690	0.00044	ENSMUSP00000000193,ENSMUSP00000006614,ENSMUSP00000016172,ENSMUSP00000020171,ENSMUSP00000021552,ENSMUSP00000022368,ENSMUSP00000022709,ENSMUSP00000023779,ENSMUSP00000025363,ENSMUSP00000026999,ENSMUSP00000031325,ENSMUSP00000034472,ENSMUSP00000035065,ENSMUSP00000037042,ENSMUSP00000038405,ENSMUSP00000048736,ENSMUSP00000049292,ENSMUSP00000064680,ENSMUSP00000066488,ENSMUSP00000067013,ENSMUSP00000073099,…	Adm,Agt,Areg,Ccl2,Celsr1,Cited2,Ctgf,Egr3,Epha1,Epha2,Hbegf,Jam3,Jun,Junb,Nr4a1,Plau,Ptger4,Ptgs2,Rhob,Shank3,Smad7,Spry1,Spry2,Zfp36l1
GO:0045595	regulation of cell differentiation	44	1751	0.00044	ENSMUSP00000020118,ENSMUSP00000020171,ENSMUSP00000021552,ENSMUSP00000021674,ENSMUSP00000022212,ENSMUSP00000022709,ENSMUSP00000023610,ENSMUSP00000025691,ENSMUSP00000025718,ENSMUSP00000026999,ENSMUSP00000029623,ENSMUSP00000031325,ENSMUSP00000035065,ENSMUSP00000035781,ENSMUSP00000037042,ENSMUSP00000037246,ENSMUSP00000046787,ENSMUSP00000047968,ENSMUSP00000048230,ENSMUSP00000048736,ENSMUSP00000052085,…	Adamts1,Adm,Agt,Akap5,Ankrd1,Areg,Ccr7,Cd53,Ctgf,Daam2,Dusp6,Egr3,Fam101a,Fas,Fos,Gpr68,Igsf10,Inpp5d,Islr2,Jun,Junb,Lif,Nfkbiz,Ngef,Nr1d1,Nr1d2,Per2,Pias1,Plk2,Ptger4,Ptgs2,Ptn,Robo2,S100b,Sgk1,Shank3,Smad7,Spry2,Tbr1,Tlr2,Tnfrsf26,Trib1,Zfp36,Zfp36l1
GO:0042326	negative regulation of phosphorylation	19	466	0.00046	ENSMUSP00000003635,ENSMUSP00000020118,ENSMUSP00000021271,ENSMUSP00000022709,ENSMUSP00000025025,ENSMUSP00000025295,ENSMUSP00000026999,ENSMUSP00000033056,ENSMUSP00000039950,ENSMUSP00000047844,ENSMUSP00000049292,ENSMUSP00000049488,ENSMUSP00000057563,ENSMUSP00000067066,ENSMUSP00000068834,ENSMUSP00000073099,ENSMUSP00000102711,ENSMUSP00000102718,ENSMUSP00000109010	Chad,Dusp1,Dusp6,Epha1,Flrt1,Gp1ba,Ier3,Jun,Lif,Lrrc19,Per1,Pmepa1,Ppp1r15a,Pycard,Smad7,Spry1,Spry2,Spry4,Trib1
GO:0001933	negative regulation of protein phosphorylation	18	426	0.00048	ENSMUSP00000020118,ENSMUSP00000021271,ENSMUSP00000022709,ENSMUSP00000025025,ENSMUSP00000025295,ENSMUSP00000026999,ENSMUSP00000033056,ENSMUSP00000039950,ENSMUSP00000047844,ENSMUSP00000049292,ENSMUSP00000049488,ENSMUSP00000057563,ENSMUSP00000067066,ENSMUSP00000068834,ENSMUSP00000073099,ENSMUSP00000102711,ENSMUSP00000102718,ENSMUSP00000109010	Chad,Dusp1,Dusp6,Epha1,Flrt1,Gp1ba,Jun,Lif,Lrrc19,Per1,Pmepa1,Ppp1r15a,Pycard,Smad7,Spry1,Spry2,Spry4,Trib1
GO:0032355	response to estradiol	10	133	0.00048	ENSMUSP00000000193,ENSMUSP00000020171,ENSMUSP00000025025,ENSMUSP00000029270,ENSMUSP00000031325,ENSMUSP00000035065,ENSMUSP00000047518,ENSMUSP00000082154,ENSMUSP00000087098,ENSMUSP00000099073	Areg,Arnt2,Ccl2,Ccna2,Ctgf,Dusp1,Mapk15,Ptgs2,Ptn,Ramp3
GO:0043065	positive regulation of apoptotic process	22	601	0.00048	ENSMUSP00000017881,ENSMUSP00000020118,ENSMUSP00000020171,ENSMUSP00000021635,ENSMUSP00000023779,ENSMUSP00000025025,ENSMUSP00000025691,ENSMUSP00000025718,ENSMUSP00000025850,ENSMUSP00000033056,ENSMUSP00000035065,ENSMUSP00000035120,ENSMUSP00000047968,ENSMUSP00000066488,ENSMUSP00000067013,ENSMUSP00000069616,ENSMUSP00000091226,ENSMUSP00000099073,ENSMUSP00000102711,ENSMUSP00000127941,ENSMUSP00000132815,…	Adm,Agt,Akr1c18,Ankrd1,Cck,Ctgf,Dusp1,Dusp6,Egr1,Fas,Fosl1,Inpp5d,Jun,Mmp9,Nr4a1,Phlda1,Ptgs2,Ptn,Pycard,Rhob,S100b,Sp110
GO:0007399	nervous system development	51	2181	0.00054	ENSMUSP00000000193,ENSMUSP00000004389,ENSMUSP00000006614,ENSMUSP00000016172,ENSMUSP00000020102,ENSMUSP00000020692,ENSMUSP00000021552,ENSMUSP00000021674,ENSMUSP00000022212,ENSMUSP00000023610,ENSMUSP00000023750,ENSMUSP00000025691,ENSMUSP00000025718,ENSMUSP00000029623,ENSMUSP00000031325,ENSMUSP00000034472,ENSMUSP00000035058,ENSMUSP00000035120,ENSMUSP00000037042,ENSMUSP00000037246,ENSMUSP00000038405,…	Ablim1,Adamts1,Adm,Agt,Akap5,Amigo3,Ank3,Ankrd1,Areg,Arhgef28,Arnt2,Btg2,Camsap3,Cck,Ccl2,Celsr1,Cited2,Cspg5,Daam2,Egr2,Egr3,Epha2,Etv1,Faim2,Fas,Flrt1,Fos,Gpr110,Grcc10,Ier2,Igsf10,Islr2,Jam3,Jun,Kif5a,Lif,Myo7a,Ngef,Per2,Plk2,Ptn,Robo2,Rpgrip1,S100b,Sgk1,Shank3,Slc17a8,Tbr1,Tlr2,Tnfrsf26,Zfp36l1
GO:0007610	behavior	23	655	0.00055	ENSMUSP00000004389,ENSMUSP00000016172,ENSMUSP00000020692,ENSMUSP00000021674,ENSMUSP00000022212,ENSMUSP00000022353,ENSMUSP00000025850,ENSMUSP00000029623,ENSMUSP00000035065,ENSMUSP00000035120,ENSMUSP00000041053,ENSMUSP00000046787,ENSMUSP00000047968,ENSMUSP00000049380,ENSMUSP00000066488,ENSMUSP00000069616,ENSMUSP00000093442,ENSMUSP00000096248,ENSMUSP00000099073,ENSMUSP00000102711,ENSMUSP00000104932,…	Agt,Btg2,Cck,Celsr1,Egr1,Egr2,Etv1,Fos,Fosl1,Gcnt4,Gpr110,Grcc10,Jun,Mss51,Pias1,Plk2,Ptgs2,Ptn,S100b,Sgk1,Shank3,Tbr1,Tlr2
GO:0009888	tissue development	41	1599	0.00055	ENSMUSP00000006614,ENSMUSP00000016172,ENSMUSP00000016315,ENSMUSP00000017881,ENSMUSP00000020171,ENSMUSP00000020692,ENSMUSP00000021552,ENSMUSP00000021674,ENSMUSP00000022368,ENSMUSP00000022709,ENSMUSP00000023779,ENSMUSP00000025025,ENSMUSP00000025363,ENSMUSP00000025718,ENSMUSP00000026999,ENSMUSP00000028160,ENSMUSP00000029574,ENSMUSP00000031325,ENSMUSP00000032107,ENSMUSP00000035065,ENSMUSP00000037246,…	Adm,Agt,Ankrd1,Areg,Btg2,Camsap3,Celsr1,Cited2,Creb5,Ctgf,Dusp1,Eda2r,Egr1,Egr2,Epha2,Fos,Gcnt4,Hbegf,Igsf10,Jun,Junb,Kbtbd8,Klf2,Lamb3,Lif,Mmp9,Myo7a,Nr4a1,Plau,Ptgs2,Ptn,Rhob,Robo2,Shank3,Slc25a25,Smad7,Spry1,Spry2,Stac3,Vcam1,Zfp36l1
GO:0016525	negative regulation of angiogenesis	9	107	0.00055	ENSMUSP00000000193,ENSMUSP00000006614,ENSMUSP00000022212,ENSMUSP00000022709,ENSMUSP00000023610,ENSMUSP00000064823,ENSMUSP00000066488,ENSMUSP00000067066,ENSMUSP00000099073	Adamts1,Agt,Ccl2,Epha2,Klf2,Lif,Plk2,Ptn,Spry2
GO:0051246	regulation of protein metabolic process	58	2612	0.00055	ENSMUSP00000000193,ENSMUSP00000003635,ENSMUSP00000006614,ENSMUSP00000017881,ENSMUSP00000020118,ENSMUSP00000020171,ENSMUSP00000020692,ENSMUSP00000021271,ENSMUSP00000021552,ENSMUSP00000022212,ENSMUSP00000022709,ENSMUSP00000023779,ENSMUSP00000025025,ENSMUSP00000025295,ENSMUSP00000025363,ENSMUSP00000025691,ENSMUSP00000026672,ENSMUSP00000026999,ENSMUSP00000029623,ENSMUSP00000031325,ENSMUSP00000032107,…	Acrbp,Adam33,Adra2a,Agt,Akap5,Areg,Btg2,Cck,Ccl2,Ccr7,Chad,Ctgf,Dusp1,Dusp6,Eda2r,Egr1,Eif4ebp3,Epha1,Epha2,Fas,Flrt1,Gp1ba,Hbegf,Ier3,Inpp5d,Jun,Kbtbd8,Klf2,Lif,Lrrc19,Mapk15,Mmp9,Nr4a1,Pde8a,Per1,Per2,Pias1,Plk2,Plk3,Pmepa1,Ppp1r15a,Ptger4,Ptgs2,Pycard,Ramp3,S100b,Serpinb1a,Smad7,Spry1,Spry2,Spry4,Tlr2,Tnfrsf18,Trib1,Trim30a,Wfikkn1,Zfp36,Zfp36l1
GO:0071407	cellular response to organic cyclic compound	19	475	0.00055	ENSMUSP00000000193,ENSMUSP00000021552,ENSMUSP00000021635,ENSMUSP00000023779,ENSMUSP00000025718,ENSMUSP00000029270,ENSMUSP00000035065,ENSMUSP00000047518,ENSMUSP00000053092,ENSMUSP00000057815,ENSMUSP00000064823,ENSMUSP00000069505,ENSMUSP00000069616,ENSMUSP00000088031,ENSMUSP00000099073,ENSMUSP00000105538,ENSMUSP00000108498,ENSMUSP00000114074,ENSMUSP00000114166	Akr1c18,Ankrd1,Ccl2,Ccna2,Egr1,Klf2,Nr1d1,Nr1d2,Nr1h4,Nr3c2,Nr4a1,Nr6a1,Paqr6,Ptgs2,Ptn,Ramp3,Sgk1,Zfp36,Zfp36l1
GO:0048585	negative regulation of response to stimulus	39	1496	0.0006	ENSMUSP00000003635,ENSMUSP00000006614,ENSMUSP00000017881,ENSMUSP00000020118,ENSMUSP00000021271,ENSMUSP00000022212,ENSMUSP00000022368,ENSMUSP00000022709,ENSMUSP00000023750,ENSMUSP00000025025,ENSMUSP00000025197,ENSMUSP00000025295,ENSMUSP00000026672,ENSMUSP00000026999,ENSMUSP00000033056,ENSMUSP00000035065,ENSMUSP00000035120,ENSMUSP00000036203,ENSMUSP00000039950,ENSMUSP00000047518,ENSMUSP00000047844,…	Adm,Adra2a,Agt,Cck,Chad,Dusp1,Dusp6,Egr1,Epha2,Faim2,Flrt1,Gp1ba,Ier3,Inpp5d,Lif,Lrrc19,Mmp9,Nr1d1,Nr1h4,Pde8a,Per1,Plau,Plk2,Pmepa1,Ppp1r15a,Ptger4,Ptgs2,Pycard,Ramp3,Robo2,Smad7,Spry1,Spry2,Spry4,Tap2,Trib1,Trim30a,Wfikkn1,Zfp36
GO:0035914	skeletal muscle cell differentiation	7	59	0.00061	ENSMUSP00000020692,ENSMUSP00000021674,ENSMUSP00000023779,ENSMUSP00000025718,ENSMUSP00000038405,ENSMUSP00000041053,ENSMUSP00000069616	Ankrd1,Btg2,Cited2,Egr1,Egr2,Fos,Nr4a1
GO:0001666	response to hypoxia	14	278	0.00065	ENSMUSP00000000193,ENSMUSP00000021552,ENSMUSP00000022368,ENSMUSP00000025718,ENSMUSP00000029270,ENSMUSP00000035065,ENSMUSP00000038405,ENSMUSP00000047968,ENSMUSP00000069616,ENSMUSP00000076130,ENSMUSP00000082154,ENSMUSP00000099073,ENSMUSP00000125729,ENSMUSP00000140890	Adm,Ankrd1,Arnt2,Ccl2,Ccna2,Cited2,Egr1,Plau,Plk3,Ptgs2,Ptn,S100b,Usf1,Zfp36l1
GO:0009966	regulation of signal transduction	61	2823	0.00065	ENSMUSP00000000193,ENSMUSP00000003635,ENSMUSP00000006614,ENSMUSP00000017881,ENSMUSP00000020118,ENSMUSP00000020171,ENSMUSP00000021271,ENSMUSP00000021635,ENSMUSP00000022368,ENSMUSP00000022709,ENSMUSP00000023750,ENSMUSP00000025025,ENSMUSP00000025295,ENSMUSP00000025363,ENSMUSP00000025691,ENSMUSP00000025718,ENSMUSP00000026672,ENSMUSP00000026999,ENSMUSP00000029623,ENSMUSP00000031325,ENSMUSP00000031327,…	Adm,Adra2a,Agt,Akap5,Akr1b3,Akr1c18,Ankrd1,Areg,Arhgef28,Blnk,Cck,Ccl2,Ccr7,Chad,Cited2,Ctgf,Cxcl1,Daam2,Dusp1,Dusp6,Eda2r,Egr1,Epha2,Faim2,Fas,Flrt1,Gp1ba,Hbegf,Ier3,Il17c,Inpp5d,Jun,Lif,Lrrc19,Mmp9,Ngef,Nppb,Nr1d1,Nr1h4,Pde8a,Per1,Plau,Pmepa1,Ptger4,Ptgs2,Ptn,Pycard,Ramp3,Robo2,S100b,Shank3,Smad7,Sp100,Spry1,Spry2,Spry4,Tlr2,Tnfrsf18,Trib1,Trim30a,Wfikkn1
GO:0060341	regulation of cellular localization	26	811	0.00065	ENSMUSP00000000193,ENSMUSP00000003635,ENSMUSP00000006614,ENSMUSP00000007248,ENSMUSP00000016172,ENSMUSP00000021552,ENSMUSP00000035065,ENSMUSP00000036203,ENSMUSP00000042410,ENSMUSP00000047518,ENSMUSP00000048148,ENSMUSP00000048736,ENSMUSP00000053092,ENSMUSP00000057815,ENSMUSP00000066399,ENSMUSP00000066620,ENSMUSP00000067066,ENSMUSP00000069505,ENSMUSP00000076130,ENSMUSP00000087098,ENSMUSP00000090089,…	Adra2a,Akap5,Ank3,Ccl2,Celsr1,Epha2,Gpr68,Hspa1l,Ier3,Kcnc3,Lif,Mapk15,Nr1d1,Nr1h4,Per2,Plk3,Ptger4,Ptgs2,Ptn,Ramp3,Shank3,Slc30a1,Sp100,Stac3,Zfp36,Zfp36l1
GO:0071453	cellular response to oxygen levels	10	140	0.00065	ENSMUSP00000021552,ENSMUSP00000025691,ENSMUSP00000025718,ENSMUSP00000029270,ENSMUSP00000035065,ENSMUSP00000038405,ENSMUSP00000047968,ENSMUSP00000069616,ENSMUSP00000076130,ENSMUSP00000099073	Ankrd1,Ccna2,Cited2,Egr1,Fas,Plk3,Ptgs2,Ptn,S100b,Zfp36l1
GO:0003008	system process	38	1454	0.0007	ENSMUSP00000003635,ENSMUSP00000004389,ENSMUSP00000020102,ENSMUSP00000020692,ENSMUSP00000021674,ENSMUSP00000022212,ENSMUSP00000022709,ENSMUSP00000025691,ENSMUSP00000025850,ENSMUSP00000029623,ENSMUSP00000034472,ENSMUSP00000035065,ENSMUSP00000036203,ENSMUSP00000041053,ENSMUSP00000046787,ENSMUSP00000047518,ENSMUSP00000047968,ENSMUSP00000048148,ENSMUSP00000048736,ENSMUSP00000049380,ENSMUSP00000066488,…	Adm,Adra2a,Agt,Akr1b3,Ank3,Btg2,Egr1,Egr2,Fas,Fos,Fosl1,Gpr110,Grcc10,Ier3,Jam3,Jun,Kcnd3,Muc6,Myo7a,Nppb,Nr3c2,Per2,Pias1,Pkd1l3,Plk2,Ptger4,Ptgs2,Ptn,Ramp3,Rpgrip1,S100b,Sgk1,Shank3,Slc17a8,Spry2,Stac3,Tbr1,Tlr2
GO:0030182	neuron differentiation	29	973	0.00074	ENSMUSP00000004389,ENSMUSP00000006614,ENSMUSP00000020692,ENSMUSP00000023750,ENSMUSP00000025691,ENSMUSP00000031325,ENSMUSP00000034472,ENSMUSP00000035120,ENSMUSP00000041053,ENSMUSP00000046787,ENSMUSP00000049380,ENSMUSP00000054938,ENSMUSP00000060275,ENSMUSP00000067066,ENSMUSP00000078336,ENSMUSP00000090089,ENSMUSP00000093442,ENSMUSP00000096775,ENSMUSP00000099073,ENSMUSP00000102711,ENSMUSP00000102745,…	Ablim1,Adm,Ank3,Areg,Arhgef28,Btg2,Camsap3,Cck,Egr2,Epha2,Etv1,Faim2,Fas,Flrt1,Gpr110,Grcc10,Ier2,Jam3,Jun,Kif5a,Lif,Myo7a,Ptn,Robo2,Rpgrip1,Sgk1,Shank3,Tbr1,Tnfrsf26
GO:0060255	regulation of macromolecule metabolic process	97	5246	0.00074	ENSMUSP00000000080,ENSMUSP00000000193,ENSMUSP00000003635,ENSMUSP00000006614,ENSMUSP00000009340,ENSMUSP00000017881,ENSMUSP00000020118,ENSMUSP00000020171,ENSMUSP00000020298,ENSMUSP00000020692,ENSMUSP00000021271,ENSMUSP00000021552,ENSMUSP00000021674,ENSMUSP00000022212,ENSMUSP00000022709,ENSMUSP00000023024,ENSMUSP00000023779,ENSMUSP00000025025,ENSMUSP00000025295,ENSMUSP00000025363,ENSMUSP00000025691,…	Ablim1,Acrbp,Adam33,Adra2a,Agt,Akap5,Ank3,Ankrd1,Areg,Arnt2,Bpgm,Btg2,Cck,Ccl2,Ccna2,Ccr7,Chad,Cited2,Creb5,Csrnp1,Ctgf,Cyp3a41a,Dbp,Dnmt3l,Dusp1,Dusp6,Eda2r,Egr1,Egr2,Egr3,Eif4ebp3,Epha1,Epha2,Etv1,Fas,Flrt1,Fos,Fosl1,Gp1ba,Gpr110,Hbegf,Hist1h1d,Ier2,Ier3,Inpp5d,Jun,Junb,Kbtbd8,Klf2,Klf6,Lif,Lrrc19,Mapk15,Mmp9,Mnda,Nfkbiz,Nr1d1,Nr1d2,Nr1h4,Nr3c2,Nr4a1,Nr6a1,Pcbd1,Pde8a,Per1,Per2,Per3,Pias1,Plk2,…
GO:1901701	cellular response to oxygen-containing compound	27	870	0.00074	ENSMUSP00000000193,ENSMUSP00000017881,ENSMUSP00000021552,ENSMUSP00000021635,ENSMUSP00000021674,ENSMUSP00000023779,ENSMUSP00000025718,ENSMUSP00000029270,ENSMUSP00000029574,ENSMUSP00000029623,ENSMUSP00000033056,ENSMUSP00000035065,ENSMUSP00000047518,ENSMUSP00000048736,ENSMUSP00000053092,ENSMUSP00000057815,ENSMUSP00000064823,ENSMUSP00000067013,ENSMUSP00000069505,ENSMUSP00000069616,ENSMUSP00000073913,…	Akr1b3,Akr1c18,Ankrd1,Ccl2,Ccna2,Cd300lb,Egr1,Fos,Gbp2,Jun,Klf2,Mmp9,Nr1d1,Nr1h4,Nr4a1,Ptger4,Ptgs2,Ptn,Pycard,Ramp3,Rhob,Sgk1,Tlr2,Usf1,Vcam1,Zfp36,Zfp36l1
GO:0051248	negative regulation of protein metabolic process	31	1079	0.00075	ENSMUSP00000017881,ENSMUSP00000020118,ENSMUSP00000020692,ENSMUSP00000021271,ENSMUSP00000021552,ENSMUSP00000022709,ENSMUSP00000023779,ENSMUSP00000025025,ENSMUSP00000025295,ENSMUSP00000025363,ENSMUSP00000026999,ENSMUSP00000033056,ENSMUSP00000035065,ENSMUSP00000039298,ENSMUSP00000039950,ENSMUSP00000047844,ENSMUSP00000049292,ENSMUSP00000049488,ENSMUSP00000057563,ENSMUSP00000057815,ENSMUSP00000066488,…	Agt,Btg2,Chad,Dusp1,Dusp6,Eif4ebp3,Epha1,Flrt1,Gp1ba,Hbegf,Inpp5d,Jun,Lif,Lrrc19,Mmp9,Nr4a1,Per1,Per2,Pmepa1,Ppp1r15a,Ptgs2,Pycard,Serpinb1a,Smad7,Spry1,Spry2,Spry4,Trib1,Wfikkn1,Zfp36,Zfp36l1
GO:0065008	regulation of biological quality	70	3420	0.00075	ENSMUSP00000000193,ENSMUSP00000003635,ENSMUSP00000009727,ENSMUSP00000016172,ENSMUSP00000017881,ENSMUSP00000020000,ENSMUSP00000020171,ENSMUSP00000021458,ENSMUSP00000021552,ENSMUSP00000021635,ENSMUSP00000022212,ENSMUSP00000022368,ENSMUSP00000025691,ENSMUSP00000026999,ENSMUSP00000029574,ENSMUSP00000029623,ENSMUSP00000030674,ENSMUSP00000031327,ENSMUSP00000033056,ENSMUSP00000034472,ENSMUSP00000035065,…	Adm,Adra2a,Agt,Akap5,Akr1b3,Akr1c18,Amigo3,Ank3,Bpgm,Cck,Ccl2,Ccr7,Celsr1,Cited2,Ctgf,Cxcl1,Egr1,Egr2,Fas,Flrt1,Gcnt4,Gp1ba,Gpr68,Hebp2,Ier3,Inpp5d,Islr2,Jam3,Jun,Kcnc3,Kcnd3,Kcnk7,Klf2,Letm2,Lif,Mapk15,Mest,Mmp9,Muc6,Ngef,Nppb,Nr1d1,Nr1d2,Nr1h4,Nr3c2,Per2,Per3,Plau,Plb1,Plk2,Ppp1r15a,Ptger4,Ptgs2,Ptn,Pycard,Ramp3,S100b,Sgk1,Shank3,Slc30a1,Smad7,Sp100,Sptb,Syngr1,Sytl1,Tlr2,Usf1,Vcam1,Zfp36,Zfp36…
GO:0048468	cell development	40	1579	0.00079	ENSMUSP00000000421,ENSMUSP00000004389,ENSMUSP00000006614,ENSMUSP00000020692,ENSMUSP00000022327,ENSMUSP00000025691,ENSMUSP00000029623,ENSMUSP00000031325,ENSMUSP00000032107,ENSMUSP00000034472,ENSMUSP00000035120,ENSMUSP00000038405,ENSMUSP00000041053,ENSMUSP00000047393,ENSMUSP00000048148,ENSMUSP00000049292,ENSMUSP00000049380,ENSMUSP00000054938,ENSMUSP00000060893,ENSMUSP00000064823,ENSMUSP00000066488,…	Ablim1,Acrbp,Adm,Agt,Ank3,Areg,Arhgef28,Bpgm,Btg2,Camsap3,Cck,Ccnb1ip1,Cited2,Egr2,Epha1,Epha2,Etv1,Fas,Flrt1,Gpr110,Gpr149,Grcc10,Jam3,Jun,Kbtbd8,Kif5a,Klf2,Ldb3,Lif,Myo7a,Robo2,Rpgrip1,Sgk1,Shank3,Spry1,Stac3,Tlr2,Tnfrsf26,Tssk3,Wfikkn1
GO:0050804	modulation of chemical synaptic transmission	16	367	0.00085	ENSMUSP00000000193,ENSMUSP00000009727,ENSMUSP00000016172,ENSMUSP00000017881,ENSMUSP00000022212,ENSMUSP00000035058,ENSMUSP00000035065,ENSMUSP00000041053,ENSMUSP00000042410,ENSMUSP00000047968,ENSMUSP00000048736,ENSMUSP00000066488,ENSMUSP00000069616,ENSMUSP00000099073,ENSMUSP00000103539,ENSMUSP00000104932	Agt,Ccl2,Celsr1,Cspg5,Egr1,Egr2,Kcnc3,Mmp9,Plk2,Ptger4,Ptgs2,Ptn,S100b,Shank3,Slc30a1,Syngr1
GO:0051348	negative regulation of transferase activity	14	288	0.00087	ENSMUSP00000020118,ENSMUSP00000022709,ENSMUSP00000025025,ENSMUSP00000025295,ENSMUSP00000026999,ENSMUSP00000033056,ENSMUSP00000047844,ENSMUSP00000049292,ENSMUSP00000057563,ENSMUSP00000057815,ENSMUSP00000068834,ENSMUSP00000073099,ENSMUSP00000102718,ENSMUSP00000109010	Chad,Dusp1,Dusp6,Epha1,Flrt1,Gp1ba,Lrrc19,Pycard,Smad7,Spry1,Spry2,Spry4,Trib1,Zfp36
GO:0031175	neuron projection development	22	637	0.00089	ENSMUSP00000004389,ENSMUSP00000020692,ENSMUSP00000025691,ENSMUSP00000031325,ENSMUSP00000034472,ENSMUSP00000035120,ENSMUSP00000041053,ENSMUSP00000049380,ENSMUSP00000054938,ENSMUSP00000078336,ENSMUSP00000090089,ENSMUSP00000093442,ENSMUSP00000096775,ENSMUSP00000102711,ENSMUSP00000102745,ENSMUSP00000104932,ENSMUSP00000105053,ENSMUSP00000109010,ENSMUSP00000112776,ENSMUSP00000114074,ENSMUSP00000125993,…	Ablim1,Adm,Ank3,Areg,Arhgef28,Btg2,Camsap3,Cck,Egr2,Etv1,Fas,Flrt1,Gpr110,Grcc10,Jam3,Jun,Kif5a,Myo7a,Robo2,Sgk1,Shank3,Tnfrsf26
GO:0071456	cellular response to hypoxia	9	117	0.00089	ENSMUSP00000021552,ENSMUSP00000025718,ENSMUSP00000029270,ENSMUSP00000035065,ENSMUSP00000038405,ENSMUSP00000047968,ENSMUSP00000069616,ENSMUSP00000076130,ENSMUSP00000099073	Ankrd1,Ccna2,Cited2,Egr1,Plk3,Ptgs2,Ptn,S100b,Zfp36l1
GO:0014074	response to purine-containing compound	10	148	0.0009	ENSMUSP00000000193,ENSMUSP00000021271,ENSMUSP00000021552,ENSMUSP00000021674,ENSMUSP00000025025,ENSMUSP00000025850,ENSMUSP00000031325,ENSMUSP00000035065,ENSMUSP00000064680,ENSMUSP00000102711	Areg,Ccl2,Dusp1,Fos,Fosl1,Jun,Junb,Per1,Ptgs2,Zfp36l1
GO:0070372	regulation of ERK1 and ERK2 cascade	14	290	0.0009	ENSMUSP00000000193,ENSMUSP00000006614,ENSMUSP00000020118,ENSMUSP00000020171,ENSMUSP00000022709,ENSMUSP00000025025,ENSMUSP00000025295,ENSMUSP00000026672,ENSMUSP00000029623,ENSMUSP00000033056,ENSMUSP00000047518,ENSMUSP00000049292,ENSMUSP00000067066,ENSMUSP00000102711	Ccl2,Ctgf,Dusp1,Dusp6,Epha2,Jun,Lif,Pde8a,Pycard,Ramp3,Spry1,Spry2,Spry4,Tlr2
GO:0070542	response to fatty acid	8	90	0.00092	ENSMUSP00000000193,ENSMUSP00000020171,ENSMUSP00000021635,ENSMUSP00000029623,ENSMUSP00000035065,ENSMUSP00000048736,ENSMUSP00000053092,ENSMUSP00000099423	Akr1c18,Ccl2,Ccr7,Ctgf,Nr1h4,Ptger4,Ptgs2,Tlr2
GO:0051591	response to cAMP	8	93	0.0011	ENSMUSP00000021271,ENSMUSP00000021552,ENSMUSP00000021674,ENSMUSP00000025025,ENSMUSP00000025850,ENSMUSP00000031325,ENSMUSP00000064680,ENSMUSP00000102711	Areg,Dusp1,Fos,Fosl1,Jun,Junb,Per1,Zfp36l1
GO:0051254	positive regulation of RNA metabolic process	39	1558	0.0012	ENSMUSP00000000080,ENSMUSP00000020298,ENSMUSP00000020692,ENSMUSP00000021271,ENSMUSP00000021552,ENSMUSP00000021674,ENSMUSP00000023024,ENSMUSP00000023779,ENSMUSP00000025718,ENSMUSP00000025850,ENSMUSP00000029270,ENSMUSP00000029623,ENSMUSP00000035101,ENSMUSP00000037042,ENSMUSP00000038405,ENSMUSP00000038532,ENSMUSP00000041053,ENSMUSP00000046787,ENSMUSP00000049488,ENSMUSP00000053092,ENSMUSP00000057815,…	Ablim1,Agt,Ankrd1,Arnt2,Btg2,Ccna2,Cited2,Creb5,Csrnp1,Dbp,Egr1,Egr2,Egr3,Etv1,Fos,Fosl1,Ier2,Jun,Junb,Klf2,Klf6,Lif,Nr1d1,Nr1d2,Nr1h4,Nr4a1,Nr6a1,Pcbd1,Per1,Per2,Pias1,Ppp1r15a,Rbm20,Tbr1,Tef,Tlr2,Usf1,Zfp36,Zfp36l1
GO:0007166	cell surface receptor signaling pathway	41	1683	0.0014	ENSMUSP00000000080,ENSMUSP00000000193,ENSMUSP00000006614,ENSMUSP00000016172,ENSMUSP00000020171,ENSMUSP00000021674,ENSMUSP00000025363,ENSMUSP00000025691,ENSMUSP00000026999,ENSMUSP00000029623,ENSMUSP00000031325,ENSMUSP00000031327,ENSMUSP00000033056,ENSMUSP00000035101,ENSMUSP00000035121,ENSMUSP00000035781,ENSMUSP00000038405,ENSMUSP00000047844,ENSMUSP00000049380,ENSMUSP00000052085,ENSMUSP00000053092,…	Agt,Amotl2,Areg,Blnk,Ccl2,Ccr7,Cd53,Celsr1,Chad,Cited2,Csf2rb,Csrnp1,Ctgf,Cxcl1,Daam2,Egr1,Epha1,Epha2,Fas,Flrt1,Fos,Gp1ba,Gpr110,Hbegf,Jun,Klf6,Lif,Lrrc19,Matk,Nfkbiz,Ngef,Nppb,Nr1h4,P2ry14,Pias1,Pycard,Robo2,Smad7,Tlr2,Tnfrsf18,Tnfrsf26
GO:0006366	transcription by RNA polymerase II	20	570	0.0015	ENSMUSP00000000080,ENSMUSP00000021674,ENSMUSP00000023024,ENSMUSP00000023779,ENSMUSP00000025850,ENSMUSP00000035101,ENSMUSP00000037042,ENSMUSP00000038532,ENSMUSP00000041053,ENSMUSP00000046787,ENSMUSP00000053092,ENSMUSP00000060275,ENSMUSP00000064680,ENSMUSP00000069616,ENSMUSP00000079693,ENSMUSP00000082154,ENSMUSP00000093442,ENSMUSP00000102711,ENSMUSP00000108498,ENSMUSP00000125729	Arnt2,Creb5,Csrnp1,Dbp,Egr1,Egr2,Egr3,Etv1,Fos,Fosl1,Ier2,Jun,Junb,Klf6,Nr1h4,Nr4a1,Nr6a1,Tbr1,Tef,Usf1
GO:0031324	negative regulation of cellular metabolic process	52	2357	0.0015	ENSMUSP00000003635,ENSMUSP00000009340,ENSMUSP00000017881,ENSMUSP00000020118,ENSMUSP00000020692,ENSMUSP00000021271,ENSMUSP00000021552,ENSMUSP00000021635,ENSMUSP00000022709,ENSMUSP00000023779,ENSMUSP00000025025,ENSMUSP00000025295,ENSMUSP00000025363,ENSMUSP00000025718,ENSMUSP00000026999,ENSMUSP00000033056,ENSMUSP00000035065,ENSMUSP00000038405,ENSMUSP00000039298,ENSMUSP00000039950,ENSMUSP00000044395,…	Agt,Akr1c18,Ankrd1,Btg2,Camsap3,Chad,Cited2,Dnmt3l,Dusp1,Dusp6,Egr1,Eif4ebp3,Epha1,Flrt1,Gp1ba,Hbegf,Hist1h1d,Ier3,Inpp5d,Jun,Junb,Klf2,Lif,Lrrc19,Mapk15,Mmp9,Mnda,Nr1d1,Nr1d2,Nr1h4,Nr4a1,Nr6a1,Per1,Per2,Per3,Pias1,Plk3,Pmepa1,Ppp1r15a,Ptger4,Ptgs2,Pycard,Serpinb1a,Smad7,Spry1,Spry2,Spry4,Trib1,Trim30a,Wfikkn1,Zfp36,Zfp36l1
GO:0032269	negative regulation of cellular protein metabolic process	29	1020	0.0015	ENSMUSP00000017881,ENSMUSP00000020118,ENSMUSP00000020692,ENSMUSP00000021271,ENSMUSP00000021552,ENSMUSP00000022709,ENSMUSP00000023779,ENSMUSP00000025025,ENSMUSP00000025295,ENSMUSP00000026999,ENSMUSP00000033056,ENSMUSP00000035065,ENSMUSP00000039298,ENSMUSP00000039950,ENSMUSP00000047844,ENSMUSP00000049292,ENSMUSP00000049488,ENSMUSP00000057563,ENSMUSP00000057815,ENSMUSP00000066488,ENSMUSP00000066620,…	Agt,Btg2,Chad,Dusp1,Dusp6,Eif4ebp3,Epha1,Flrt1,Gp1ba,Jun,Lif,Lrrc19,Mmp9,Nr4a1,Per1,Per2,Pmepa1,Ppp1r15a,Ptgs2,Pycard,Serpinb1a,Smad7,Spry1,Spry2,Spry4,Trib1,Wfikkn1,Zfp36,Zfp36l1
GO:0045936	negative regulation of phosphate metabolic process	20	567	0.0015	ENSMUSP00000003635,ENSMUSP00000020118,ENSMUSP00000021271,ENSMUSP00000022709,ENSMUSP00000025025,ENSMUSP00000025295,ENSMUSP00000026999,ENSMUSP00000033056,ENSMUSP00000039950,ENSMUSP00000047844,ENSMUSP00000049292,ENSMUSP00000049488,ENSMUSP00000057563,ENSMUSP00000067066,ENSMUSP00000068834,ENSMUSP00000073099,ENSMUSP00000102711,ENSMUSP00000102718,ENSMUSP00000109010,ENSMUSP00000125993	Camsap3,Chad,Dusp1,Dusp6,Epha1,Flrt1,Gp1ba,Ier3,Jun,Lif,Lrrc19,Per1,Pmepa1,Ppp1r15a,Pycard,Smad7,Spry1,Spry2,Spry4,Trib1
GO:0048660	regulation of smooth muscle cell proliferation	10	161	0.0016	ENSMUSP00000017881,ENSMUSP00000023610,ENSMUSP00000025363,ENSMUSP00000035065,ENSMUSP00000066488,ENSMUSP00000068834,ENSMUSP00000069616,ENSMUSP00000099521,ENSMUSP00000100045,ENSMUSP00000102711	Adamts1,Agt,Akr1b3,Egr1,Hbegf,Jun,Mmp9,Nppb,Ptgs2,Trib1
GO:0009987	cellular process	189	12459	0.0017	ENSMUSP00000000080,ENSMUSP00000000193,ENSMUSP00000000421,ENSMUSP00000001183,ENSMUSP00000003207,ENSMUSP00000003635,ENSMUSP00000004389,ENSMUSP00000006614,ENSMUSP00000007248,ENSMUSP00000008626,ENSMUSP00000009340,ENSMUSP00000009727,ENSMUSP00000010348,ENSMUSP00000016172,ENSMUSP00000016315,ENSMUSP00000017288,ENSMUSP00000017751,ENSMUSP00000017881,ENSMUSP00000020000,ENSMUSP00000020118,ENSMUSP00000020171,…	A3galt2,A4gnt,Ablim1,Acox2,Acrbp,Adamts1,Adm,Adra2a,Agt,Akap5,Akr1b3,Akr1c18,Amotl2,Ank3,Ankrd1,Areg,Arhgef28,Arnt2,Blnk,Bpgm,Btg2,Cadm4,Camsap3,Ccdc37,Cck,Ccl2,Ccna2,Ccnb1ip1,Ccr7,Cd160,Cd300lb,Cd53,Celsr1,Chad,Cited2,Cldn6,Cox17,Creb5,Csf2rb,Cspg5,Csrnp1,Ctgf,Ctso,Cul9,Cxcl1,Cyp2s1,Daam2,Dbp,Dgka,Dglucy,Dlgap2,Dnajc28,Dnmt3l,Dusp1,Dusp27,Dusp6,Eda2r,Egr1,Egr2,Egr3,Epha1,Epha2,Etv1,Faim2,Fam101a…
GO:0071774	response to fibroblast growth factor	7	73	0.0017	ENSMUSP00000020171,ENSMUSP00000021552,ENSMUSP00000023779,ENSMUSP00000037042,ENSMUSP00000057815,ENSMUSP00000060275,ENSMUSP00000109010	Ctgf,Egr3,Flrt1,Ier2,Nr4a1,Zfp36,Zfp36l1
GO:1902107	positive regulation of leukocyte differentiation	10	162	0.0017	ENSMUSP00000021552,ENSMUSP00000021674,ENSMUSP00000037042,ENSMUSP00000067066,ENSMUSP00000068834,ENSMUSP00000099423,ENSMUSP00000102711,ENSMUSP00000105693,ENSMUSP00000110102,ENSMUSP00000127941	Ccr7,Egr3,Fos,Gpr68,Inpp5d,Jun,Lif,Nfkbiz,Trib1,Zfp36l1
GO:0019221	cytokine-mediated signaling pathway	14	313	0.0018	ENSMUSP00000000080,ENSMUSP00000000193,ENSMUSP00000025691,ENSMUSP00000031327,ENSMUSP00000033056,ENSMUSP00000047844,ENSMUSP00000054938,ENSMUSP00000057563,ENSMUSP00000069616,ENSMUSP00000094082,ENSMUSP00000099423,ENSMUSP00000099462,ENSMUSP00000102718,ENSMUSP00000109010	Ccl2,Ccr7,Chad,Csf2rb,Cxcl1,Egr1,Fas,Flrt1,Gp1ba,Klf6,Lrrc19,Pycard,Tnfrsf18,Tnfrsf26
GO:0043401	steroid hormone mediated signaling pathway	8	101	0.0018	ENSMUSP00000023779,ENSMUSP00000053092,ENSMUSP00000069505,ENSMUSP00000088031,ENSMUSP00000105538,ENSMUSP00000108498,ENSMUSP00000114074,ENSMUSP00000114166	Nr1d1,Nr1d2,Nr1h4,Nr3c2,Nr4a1,Nr6a1,Paqr6,Sgk1
GO:0048513	animal organ development	62	3012	0.0018	ENSMUSP00000000193,ENSMUSP00000004389,ENSMUSP00000006614,ENSMUSP00000016172,ENSMUSP00000017881,ENSMUSP00000020102,ENSMUSP00000020171,ENSMUSP00000020692,ENSMUSP00000021458,ENSMUSP00000021552,ENSMUSP00000021674,ENSMUSP00000022709,ENSMUSP00000023610,ENSMUSP00000023611,ENSMUSP00000023750,ENSMUSP00000023779,ENSMUSP00000025691,ENSMUSP00000025718,ENSMUSP00000025850,ENSMUSP00000026999,ENSMUSP00000028160,…	Adamts1,Adamts5,Adm,Agt,Akr1b3,Ankrd1,Areg,Arnt2,Bpgm,Btg2,Ccl2,Ccna2,Ccr7,Celsr1,Chad,Cited2,Creb5,Csrnp1,Ctgf,Daam2,Dbp,Dnmt3l,Egr1,Egr2,Epha2,Etv1,Faim2,Fam101a,Fas,Fos,Fosl1,Gcnt4,Gpr149,Grcc10,Il17c,Jam3,Jun,Junb,Kbtbd8,Klf2,Lif,Mmp9,Myo7a,Nr4a1,Ptger4,Ptgs2,Ptn,Rbm20,Robo2,Rpgrip1,Shank3,Slc17a8,Slc25a25,Smad7,Spry1,Spry2,Sptb,Stac3,Tbr1,Tlr2,Vcam1,Zfp36l1
GO:1903708	positive regulation of hemopoiesis	11	199	0.0018	ENSMUSP00000021552,ENSMUSP00000021674,ENSMUSP00000031327,ENSMUSP00000037042,ENSMUSP00000067066,ENSMUSP00000068834,ENSMUSP00000099423,ENSMUSP00000102711,ENSMUSP00000105693,ENSMUSP00000110102,ENSMUSP00000127941	Ccr7,Cxcl1,Egr3,Fos,Gpr68,Inpp5d,Jun,Lif,Nfkbiz,Trib1,Zfp36l1
GO:0048666	neuron development	24	783	0.0021	ENSMUSP00000004389,ENSMUSP00000020692,ENSMUSP00000025691,ENSMUSP00000031325,ENSMUSP00000034472,ENSMUSP00000035120,ENSMUSP00000041053,ENSMUSP00000049380,ENSMUSP00000054938,ENSMUSP00000067066,ENSMUSP00000078336,ENSMUSP00000090089,ENSMUSP00000093442,ENSMUSP00000096775,ENSMUSP00000102711,ENSMUSP00000102745,ENSMUSP00000104932,ENSMUSP00000105053,ENSMUSP00000107230,ENSMUSP00000109010,ENSMUSP00000112776,…	Ablim1,Adm,Ank3,Areg,Arhgef28,Btg2,Camsap3,Cck,Egr2,Etv1,Fas,Flrt1,Gpr110,Grcc10,Jam3,Jun,Kif5a,Lif,Myo7a,Robo2,Rpgrip1,Sgk1,Shank3,Tnfrsf26
GO:0006469	negative regulation of protein kinase activity	12	241	0.0022	ENSMUSP00000020118,ENSMUSP00000022709,ENSMUSP00000025025,ENSMUSP00000025295,ENSMUSP00000033056,ENSMUSP00000047844,ENSMUSP00000049292,ENSMUSP00000057563,ENSMUSP00000068834,ENSMUSP00000073099,ENSMUSP00000102718,ENSMUSP00000109010	Chad,Dusp1,Dusp6,Epha1,Flrt1,Gp1ba,Lrrc19,Pycard,Spry1,Spry2,Spry4,Trib1
GO:0010648	negative regulation of cell communication	33	1269	0.0022	ENSMUSP00000003635,ENSMUSP00000006614,ENSMUSP00000017881,ENSMUSP00000020118,ENSMUSP00000021271,ENSMUSP00000022212,ENSMUSP00000022709,ENSMUSP00000023750,ENSMUSP00000025025,ENSMUSP00000025295,ENSMUSP00000026999,ENSMUSP00000033056,ENSMUSP00000035065,ENSMUSP00000036203,ENSMUSP00000039950,ENSMUSP00000042410,ENSMUSP00000047518,ENSMUSP00000047844,ENSMUSP00000049292,ENSMUSP00000053092,ENSMUSP00000057563,…	Adm,Adra2a,Agt,Chad,Dusp1,Dusp6,Egr1,Epha2,Faim2,Flrt1,Gp1ba,Ier3,Inpp5d,Lif,Lrrc19,Mmp9,Nr1d1,Nr1h4,Per1,Plk2,Pmepa1,Ptgs2,Pycard,Ramp3,Shank3,Slc30a1,Smad7,Spry1,Spry2,Spry4,Trib1,Trim30a,Wfikkn1
GO:0023057	negative regulation of signaling	33	1271	0.0022	ENSMUSP00000003635,ENSMUSP00000006614,ENSMUSP00000017881,ENSMUSP00000020118,ENSMUSP00000021271,ENSMUSP00000022212,ENSMUSP00000022709,ENSMUSP00000023750,ENSMUSP00000025025,ENSMUSP00000025295,ENSMUSP00000026999,ENSMUSP00000033056,ENSMUSP00000035065,ENSMUSP00000036203,ENSMUSP00000039950,ENSMUSP00000042410,ENSMUSP00000047518,ENSMUSP00000047844,ENSMUSP00000049292,ENSMUSP00000053092,ENSMUSP00000057563,…	Adm,Adra2a,Agt,Chad,Dusp1,Dusp6,Egr1,Epha2,Faim2,Flrt1,Gp1ba,Ier3,Inpp5d,Lif,Lrrc19,Mmp9,Nr1d1,Nr1h4,Per1,Plk2,Pmepa1,Ptgs2,Pycard,Ramp3,Shank3,Slc30a1,Smad7,Spry1,Spry2,Spry4,Trib1,Trim30a,Wfikkn1
GO:0031399	regulation of protein modification process	41	1733	0.0022	ENSMUSP00000000193,ENSMUSP00000006614,ENSMUSP00000017881,ENSMUSP00000020118,ENSMUSP00000020171,ENSMUSP00000021271,ENSMUSP00000022709,ENSMUSP00000025025,ENSMUSP00000025295,ENSMUSP00000025363,ENSMUSP00000025691,ENSMUSP00000026672,ENSMUSP00000026999,ENSMUSP00000029623,ENSMUSP00000031325,ENSMUSP00000033056,ENSMUSP00000035065,ENSMUSP00000035120,ENSMUSP00000036203,ENSMUSP00000039950,ENSMUSP00000047518,…	Adra2a,Agt,Akap5,Areg,Cck,Ccl2,Ccr7,Chad,Ctgf,Dusp1,Dusp6,Eda2r,Egr1,Epha1,Epha2,Fas,Flrt1,Gp1ba,Hbegf,Jun,Lif,Lrrc19,Mapk15,Mmp9,Pde8a,Per1,Per2,Pias1,Pmepa1,Ppp1r15a,Ptger4,Ptgs2,Pycard,Ramp3,Smad7,Spry1,Spry2,Spry4,Tlr2,Tnfrsf18,Trib1
GO:0045935	positive regulation of nucleobase-containing compound metabolic process	41	1732	0.0022	ENSMUSP00000000080,ENSMUSP00000020298,ENSMUSP00000020692,ENSMUSP00000021271,ENSMUSP00000021552,ENSMUSP00000021674,ENSMUSP00000023024,ENSMUSP00000023779,ENSMUSP00000025718,ENSMUSP00000025850,ENSMUSP00000029270,ENSMUSP00000029623,ENSMUSP00000035101,ENSMUSP00000037042,ENSMUSP00000038405,ENSMUSP00000038532,ENSMUSP00000041053,ENSMUSP00000046787,ENSMUSP00000049488,ENSMUSP00000053092,ENSMUSP00000057815,…	Ablim1,Agt,Ankrd1,Arnt2,Btg2,Ccna2,Cited2,Creb5,Csrnp1,Dbp,Dnmt3l,Egr1,Egr2,Egr3,Etv1,Fos,Fosl1,Ier2,Jun,Junb,Klf2,Klf6,Lif,Mapk15,Nr1d1,Nr1d2,Nr1h4,Nr4a1,Nr6a1,Pcbd1,Per1,Per2,Pias1,Ppp1r15a,Rbm20,Tbr1,Tef,Tlr2,Usf1,Zfp36,Zfp36l1
GO:0048661	positive regulation of smooth muscle cell proliferation	8	105	0.0022	ENSMUSP00000017881,ENSMUSP00000023610,ENSMUSP00000025363,ENSMUSP00000035065,ENSMUSP00000066488,ENSMUSP00000069616,ENSMUSP00000100045,ENSMUSP00000102711	Adamts1,Agt,Akr1b3,Egr1,Hbegf,Jun,Mmp9,Ptgs2
GO:0001817	regulation of cytokine production	20	592	0.0023	ENSMUSP00000000193,ENSMUSP00000006614,ENSMUSP00000021271,ENSMUSP00000026999,ENSMUSP00000029623,ENSMUSP00000033056,ENSMUSP00000035065,ENSMUSP00000036203,ENSMUSP00000047968,ENSMUSP00000048736,ENSMUSP00000053092,ENSMUSP00000056008,ENSMUSP00000057815,ENSMUSP00000064823,ENSMUSP00000066488,ENSMUSP00000069616,ENSMUSP00000076189,ENSMUSP00000099423,ENSMUSP00000105861,ENSMUSP00000127941	Adam33,Adra2a,Agt,Ccl2,Ccr7,Egr1,Epha2,Il17c,Inpp5d,Klf2,Nr1h4,Per1,Ptger4,Ptgs2,Pycard,S100b,Smad7,Tlr2,Trim30a,Zfp36
GO:0006954	inflammatory response	17	454	0.0024	ENSMUSP00000000193,ENSMUSP00000006614,ENSMUSP00000025691,ENSMUSP00000029623,ENSMUSP00000031327,ENSMUSP00000033056,ENSMUSP00000034472,ENSMUSP00000035065,ENSMUSP00000036203,ENSMUSP00000053092,ENSMUSP00000054938,ENSMUSP00000056008,ENSMUSP00000066488,ENSMUSP00000099423,ENSMUSP00000099462,ENSMUSP00000102711,ENSMUSP00000110102	Adra2a,Agt,Ccl2,Ccr7,Cxcl1,Epha2,Fas,Il17c,Jam3,Jun,Nfkbiz,Nr1h4,Ptgs2,Pycard,Tlr2,Tnfrsf18,Tnfrsf26
GO:0080134	regulation of response to stress	31	1167	0.0024	ENSMUSP00000000193,ENSMUSP00000003635,ENSMUSP00000020171,ENSMUSP00000021271,ENSMUSP00000022212,ENSMUSP00000022368,ENSMUSP00000025197,ENSMUSP00000025363,ENSMUSP00000025691,ENSMUSP00000025718,ENSMUSP00000026672,ENSMUSP00000029623,ENSMUSP00000031327,ENSMUSP00000033056,ENSMUSP00000035065,ENSMUSP00000036203,ENSMUSP00000048736,ENSMUSP00000049488,ENSMUSP00000053092,ENSMUSP00000056008,ENSMUSP00000057563,…	Acox2,Adra2a,Agt,Ankrd1,Ccl2,Ccr7,Ctgf,Cxcl1,Eda2r,Fas,Gp1ba,Hbegf,Ier3,Il17c,Nr1d1,Nr1d2,Nr1h4,Pde8a,Per1,Plau,Plk2,Ppp1r15a,Ptger4,Ptgs2,Pycard,Rad52,Shank3,Tap2,Tlr2,Trim30a,Zfp36
GO:0051387	negative regulation of neurotrophin TRK receptor signaling pathway	3	5	0.0025	ENSMUSP00000022709,ENSMUSP00000049292,ENSMUSP00000066488	Agt,Spry1,Spry2
GO:0010035	response to inorganic substance	18	505	0.0026	ENSMUSP00000017881,ENSMUSP00000021635,ENSMUSP00000021674,ENSMUSP00000023779,ENSMUSP00000025025,ENSMUSP00000025691,ENSMUSP00000025850,ENSMUSP00000029270,ENSMUSP00000031325,ENSMUSP00000035065,ENSMUSP00000042410,ENSMUSP00000064680,ENSMUSP00000064823,ENSMUSP00000067013,ENSMUSP00000090089,ENSMUSP00000099423,ENSMUSP00000100045,ENSMUSP00000102711	Akr1b3,Akr1c18,Ank3,Areg,Ccna2,Ccr7,Dusp1,Fas,Fos,Fosl1,Jun,Junb,Klf2,Mmp9,Nr4a1,Ptgs2,Rhob,Slc30a1
GO:0045655	regulation of monocyte differentiation	4	17	0.0029	ENSMUSP00000021552,ENSMUSP00000102711,ENSMUSP00000105693,ENSMUSP00000127941	Gpr68,Inpp5d,Jun,Zfp36l1
GO:1901652	response to peptide	16	418	0.0029	ENSMUSP00000000193,ENSMUSP00000020171,ENSMUSP00000020692,ENSMUSP00000021552,ENSMUSP00000021635,ENSMUSP00000023779,ENSMUSP00000029270,ENSMUSP00000031325,ENSMUSP00000035065,ENSMUSP00000041053,ENSMUSP00000064823,ENSMUSP00000069616,ENSMUSP00000100045,ENSMUSP00000114074,ENSMUSP00000125729,ENSMUSP00000140890	Adm,Akr1b3,Akr1c18,Areg,Btg2,Ccl2,Ccna2,Ctgf,Egr1,Egr2,Klf2,Nr4a1,Ptgs2,Sgk1,Usf1,Zfp36l1
GO:0001101	response to acid chemical	14	334	0.0031	ENSMUSP00000000193,ENSMUSP00000020171,ENSMUSP00000021635,ENSMUSP00000025025,ENSMUSP00000029623,ENSMUSP00000035065,ENSMUSP00000048736,ENSMUSP00000053092,ENSMUSP00000064823,ENSMUSP00000069616,ENSMUSP00000099073,ENSMUSP00000099423,ENSMUSP00000100045,ENSMUSP00000129639	Akr1b3,Akr1c18,Ccl2,Ccr7,Ctgf,Dusp1,Egr1,Klf2,Mest,Nr1h4,Ptger4,Ptgs2,Ptn,Tlr2
GO:0006979	response to oxidative stress	15	377	0.0031	ENSMUSP00000017881,ENSMUSP00000021635,ENSMUSP00000021674,ENSMUSP00000025025,ENSMUSP00000025850,ENSMUSP00000029270,ENSMUSP00000031325,ENSMUSP00000035065,ENSMUSP00000064823,ENSMUSP00000067013,ENSMUSP00000076130,ENSMUSP00000099423,ENSMUSP00000100045,ENSMUSP00000102711,ENSMUSP00000125502	Akr1b3,Akr1c18,Areg,Ccna2,Ccr7,Dusp1,Fos,Fosl1,Jun,Klf2,Mmp9,Plk3,Ptgs2,Rad52,Rhob
GO:0006952	defense response	29	1079	0.0032	ENSMUSP00000000193,ENSMUSP00000006614,ENSMUSP00000023611,ENSMUSP00000025691,ENSMUSP00000029623,ENSMUSP00000031327,ENSMUSP00000031540,ENSMUSP00000033056,ENSMUSP00000034472,ENSMUSP00000035065,ENSMUSP00000035120,ENSMUSP00000036203,ENSMUSP00000053092,ENSMUSP00000054938,ENSMUSP00000056008,ENSMUSP00000066488,ENSMUSP00000076189,ENSMUSP00000091226,ENSMUSP00000099423,ENSMUSP00000099462,ENSMUSP00000099889,…	Adamts5,Adra2a,Agt,C1s1,Cck,Ccl2,Ccr7,Cd160,Cxcl1,Epha2,Fas,Gbp2,Gbp3,H60b,Ifit3,Il17c,Jam3,Jun,Matk,Nfkbiz,Nr1h4,Oasl1,Ptgs2,Pycard,Sp110,Tlr2,Tnfrsf18,Tnfrsf26,Trim30a
GO:0032268	regulation of cellular protein metabolic process	52	2443	0.0032	ENSMUSP00000000193,ENSMUSP00000006614,ENSMUSP00000017881,ENSMUSP00000020118,ENSMUSP00000020171,ENSMUSP00000020692,ENSMUSP00000021271,ENSMUSP00000021552,ENSMUSP00000022212,ENSMUSP00000022709,ENSMUSP00000023779,ENSMUSP00000025025,ENSMUSP00000025295,ENSMUSP00000025363,ENSMUSP00000025691,ENSMUSP00000026672,ENSMUSP00000026999,ENSMUSP00000029623,ENSMUSP00000031325,ENSMUSP00000032107,ENSMUSP00000033056,…	Acrbp,Adra2a,Agt,Akap5,Areg,Btg2,Cck,Ccl2,Ccr7,Chad,Ctgf,Dusp1,Dusp6,Eda2r,Egr1,Eif4ebp3,Epha1,Epha2,Fas,Flrt1,Gp1ba,Hbegf,Jun,Kbtbd8,Lif,Lrrc19,Mapk15,Mmp9,Nr4a1,Pde8a,Per1,Per2,Pias1,Plk2,Plk3,Pmepa1,Ppp1r15a,Ptger4,Ptgs2,Pycard,Ramp3,Serpinb1a,Smad7,Spry1,Spry2,Spry4,Tlr2,Tnfrsf18,Trib1,Wfikkn1,Zfp36,Zfp36l1
GO:0010243	response to organonitrogen compound	25	867	0.0033	ENSMUSP00000000193,ENSMUSP00000020171,ENSMUSP00000020692,ENSMUSP00000021271,ENSMUSP00000021552,ENSMUSP00000021635,ENSMUSP00000021674,ENSMUSP00000023779,ENSMUSP00000025025,ENSMUSP00000025850,ENSMUSP00000029270,ENSMUSP00000029623,ENSMUSP00000031325,ENSMUSP00000035065,ENSMUSP00000041053,ENSMUSP00000053092,ENSMUSP00000064680,ENSMUSP00000064823,ENSMUSP00000069616,ENSMUSP00000099073,ENSMUSP00000100045,…	Adm,Akr1b3,Akr1c18,Areg,Btg2,Ccl2,Ccna2,Ctgf,Dusp1,Egr1,Egr2,Fos,Fosl1,Jun,Junb,Klf2,Nr1h4,Nr4a1,Per1,Ptgs2,Ptn,Sgk1,Tlr2,Usf1,Zfp36l1
GO:0034612	response to tumor necrosis factor	10	180	0.0033	ENSMUSP00000000193,ENSMUSP00000021552,ENSMUSP00000025691,ENSMUSP00000025718,ENSMUSP00000033056,ENSMUSP00000035065,ENSMUSP00000054938,ENSMUSP00000057815,ENSMUSP00000064823,ENSMUSP00000099462	Ankrd1,Ccl2,Fas,Klf2,Ptgs2,Pycard,Tnfrsf18,Tnfrsf26,Zfp36,Zfp36l1
GO:0043086	negative regulation of catalytic activity	23	765	0.0034	ENSMUSP00000017881,ENSMUSP00000020118,ENSMUSP00000022709,ENSMUSP00000023779,ENSMUSP00000025025,ENSMUSP00000025295,ENSMUSP00000026999,ENSMUSP00000033056,ENSMUSP00000035065,ENSMUSP00000047844,ENSMUSP00000049292,ENSMUSP00000049488,ENSMUSP00000057563,ENSMUSP00000057815,ENSMUSP00000066488,ENSMUSP00000068834,ENSMUSP00000073099,ENSMUSP00000075690,ENSMUSP00000093141,ENSMUSP00000093270,ENSMUSP00000102718,…	Agt,Akap5,Camsap3,Chad,Dusp1,Dusp6,Epha1,Flrt1,Gp1ba,Lrrc19,Mmp9,Nr4a1,Ppp1r15a,Ptgs2,Pycard,Serpinb1a,Smad7,Spry1,Spry2,Spry4,Trib1,Wfikkn1,Zfp36
GO:0009892	negative regulation of metabolic process	54	2584	0.0035	ENSMUSP00000003635,ENSMUSP00000009340,ENSMUSP00000017881,ENSMUSP00000020118,ENSMUSP00000020171,ENSMUSP00000020692,ENSMUSP00000021271,ENSMUSP00000021552,ENSMUSP00000021635,ENSMUSP00000022709,ENSMUSP00000023779,ENSMUSP00000025025,ENSMUSP00000025295,ENSMUSP00000025363,ENSMUSP00000025718,ENSMUSP00000026999,ENSMUSP00000033056,ENSMUSP00000035065,ENSMUSP00000036203,ENSMUSP00000038405,ENSMUSP00000039298,…	Adra2a,Agt,Akr1c18,Ankrd1,Btg2,Camsap3,Chad,Cited2,Ctgf,Dnmt3l,Dusp1,Dusp6,Egr1,Eif4ebp3,Epha1,Flrt1,Gp1ba,Hbegf,Hist1h1d,Ier3,Inpp5d,Jun,Junb,Klf2,Lif,Lrrc19,Mapk15,Mmp9,Mnda,Nr1d1,Nr1d2,Nr1h4,Nr4a1,Nr6a1,Per1,Per2,Per3,Pias1,Plk3,Pmepa1,Ppp1r15a,Ptger4,Ptgs2,Pycard,Serpinb1a,Smad7,Spry1,Spry2,Spry4,Trib1,Trim30a,Wfikkn1,Zfp36,Zfp36l1
GO:0045597	positive regulation of cell differentiation	28	1033	0.0035	ENSMUSP00000020171,ENSMUSP00000021552,ENSMUSP00000021674,ENSMUSP00000023610,ENSMUSP00000025718,ENSMUSP00000029623,ENSMUSP00000035065,ENSMUSP00000035781,ENSMUSP00000037042,ENSMUSP00000048736,ENSMUSP00000057815,ENSMUSP00000064680,ENSMUSP00000066488,ENSMUSP00000067066,ENSMUSP00000068834,ENSMUSP00000093270,ENSMUSP00000096248,ENSMUSP00000099073,ENSMUSP00000099423,ENSMUSP00000102711,ENSMUSP00000104932,…	Adamts1,Adm,Agt,Akap5,Ankrd1,Ccr7,Cd53,Ctgf,Egr3,Fos,Gpr68,Inpp5d,Islr2,Jun,Junb,Lif,Nfkbiz,Pias1,Ptger4,Ptgs2,Ptn,Robo2,Sgk1,Shank3,Tlr2,Trib1,Zfp36,Zfp36l1
GO:0046425	regulation of receptor signaling pathway via JAK-STAT	9	147	0.0035	ENSMUSP00000047844,ENSMUSP00000048736,ENSMUSP00000057563,ENSMUSP00000066488,ENSMUSP00000067066,ENSMUSP00000099462,ENSMUSP00000100045,ENSMUSP00000102718,ENSMUSP00000109010	Agt,Akr1b3,Chad,Flrt1,Gp1ba,Lif,Lrrc19,Ptger4,Tnfrsf18
GO:0051172	negative regulation of nitrogen compound metabolic process	48	2206	0.0035	ENSMUSP00000003635,ENSMUSP00000009340,ENSMUSP00000017881,ENSMUSP00000020118,ENSMUSP00000020692,ENSMUSP00000021271,ENSMUSP00000021552,ENSMUSP00000022709,ENSMUSP00000023779,ENSMUSP00000025025,ENSMUSP00000025295,ENSMUSP00000025363,ENSMUSP00000025718,ENSMUSP00000026999,ENSMUSP00000033056,ENSMUSP00000035065,ENSMUSP00000038405,ENSMUSP00000039298,ENSMUSP00000039950,ENSMUSP00000044395,ENSMUSP00000047844,…	Agt,Ankrd1,Btg2,Chad,Cited2,Dnmt3l,Dusp1,Dusp6,Egr1,Eif4ebp3,Epha1,Flrt1,Gp1ba,Hbegf,Hist1h1d,Ier3,Inpp5d,Jun,Junb,Klf2,Lif,Lrrc19,Mapk15,Mmp9,Mnda,Nr1d1,Nr1d2,Nr1h4,Nr4a1,Nr6a1,Per1,Per2,Per3,Pias1,Plk3,Pmepa1,Ppp1r15a,Ptgs2,Pycard,Serpinb1a,Smad7,Spry1,Spry2,Spry4,Trib1,Wfikkn1,Zfp36,Zfp36l1
GO:1902531	regulation of intracellular signal transduction	38	1599	0.0035	ENSMUSP00000000193,ENSMUSP00000006614,ENSMUSP00000017881,ENSMUSP00000020118,ENSMUSP00000020171,ENSMUSP00000021271,ENSMUSP00000021635,ENSMUSP00000022709,ENSMUSP00000025025,ENSMUSP00000025295,ENSMUSP00000025363,ENSMUSP00000025691,ENSMUSP00000025718,ENSMUSP00000026672,ENSMUSP00000029623,ENSMUSP00000033056,ENSMUSP00000035065,ENSMUSP00000036203,ENSMUSP00000047518,ENSMUSP00000047844,ENSMUSP00000047968,…	Adra2a,Agt,Akap5,Akr1b3,Akr1c18,Ankrd1,Arhgef28,Ccl2,Ccr7,Chad,Ctgf,Dusp1,Dusp6,Eda2r,Epha2,Fas,Flrt1,Gp1ba,Hbegf,Jun,Lif,Lrrc19,Mmp9,Ngef,Nr1h4,Pde8a,Per1,Ptger4,Ptgs2,Pycard,Ramp3,S100b,Spry1,Spry2,Spry4,Tlr2,Tnfrsf18,Trib1
GO:0048169	regulation of long-term neuronal synaptic plasticity	5	37	0.0037	ENSMUSP00000009727,ENSMUSP00000047968,ENSMUSP00000066488,ENSMUSP00000069616,ENSMUSP00000104932	Agt,Egr1,S100b,Shank3,Syngr1
GO:0051128	regulation of cellular component organization	50	2337	0.0037	ENSMUSP00000000193,ENSMUSP00000003635,ENSMUSP00000006614,ENSMUSP00000007248,ENSMUSP00000016172,ENSMUSP00000017881,ENSMUSP00000020171,ENSMUSP00000021458,ENSMUSP00000022212,ENSMUSP00000022709,ENSMUSP00000023610,ENSMUSP00000025025,ENSMUSP00000025363,ENSMUSP00000025691,ENSMUSP00000025718,ENSMUSP00000025850,ENSMUSP00000029623,ENSMUSP00000033056,ENSMUSP00000034472,ENSMUSP00000035120,ENSMUSP00000035781,…	Adamts1,Agt,Akap5,Amigo3,Ankrd1,Camsap3,Cck,Ccl2,Ccr7,Cd53,Celsr1,Csf2rb,Ctgf,Cul9,Dusp1,Epha1,Epha2,Fas,Flrt1,Fosl1,Hbegf,Hspa1l,Htra4,Ier3,Islr2,Jam3,Jun,Lif,Mapk15,Mmp9,Ngef,Nppb,Per2,Plk2,Pmepa1,Ppp1r15a,Ptger4,Ptn,Pycard,Robo2,S100b,Sgk1,Shank3,Shcbp1l,Spry2,Sptb,Tbr1,Tlr2,Tnfrsf26,Trim30a
GO:2000377	regulation of reactive oxygen species metabolic process	10	184	0.0037	ENSMUSP00000003635,ENSMUSP00000021635,ENSMUSP00000022368,ENSMUSP00000029623,ENSMUSP00000031327,ENSMUSP00000035065,ENSMUSP00000048736,ENSMUSP00000064823,ENSMUSP00000066488,ENSMUSP00000076189	Agt,Akr1c18,Cxcl1,Ier3,Klf2,Plau,Ptger4,Ptgs2,Tlr2,Trim30a
GO:0002763	positive regulation of myeloid leukocyte differentiation	6	61	0.0041	ENSMUSP00000021552,ENSMUSP00000021674,ENSMUSP00000067066,ENSMUSP00000068834,ENSMUSP00000102711,ENSMUSP00000105693	Fos,Gpr68,Jun,Lif,Trib1,Zfp36l1
GO:0006357	regulation of transcription by RNA polymerase II	42	1856	0.0041	ENSMUSP00000000080,ENSMUSP00000009340,ENSMUSP00000020692,ENSMUSP00000021271,ENSMUSP00000021674,ENSMUSP00000023024,ENSMUSP00000023779,ENSMUSP00000025718,ENSMUSP00000025850,ENSMUSP00000026999,ENSMUSP00000029623,ENSMUSP00000035101,ENSMUSP00000037042,ENSMUSP00000038405,ENSMUSP00000038532,ENSMUSP00000041053,ENSMUSP00000044395,ENSMUSP00000046787,ENSMUSP00000049488,ENSMUSP00000053092,ENSMUSP00000057815,…	Ablim1,Ankrd1,Arnt2,Btg2,Cited2,Creb5,Csrnp1,Dbp,Egr1,Egr2,Egr3,Etv1,Fos,Fosl1,Hist1h1d,Ier2,Jun,Junb,Klf2,Klf6,Lif,Mapk15,Mnda,Nfkbiz,Nr1d1,Nr1d2,Nr1h4,Nr3c2,Nr4a1,Nr6a1,Per1,Per2,Per3,Pias1,Plk3,Ppp1r15a,Smad7,Tbr1,Tef,Tlr2,Usf1,Zfp36
GO:0060135	maternal process involved in female pregnancy	6	62	0.0044	ENSMUSP00000000193,ENSMUSP00000035065,ENSMUSP00000038405,ENSMUSP00000064680,ENSMUSP00000067066,ENSMUSP00000100045	Akr1b3,Ccl2,Cited2,Junb,Lif,Ptgs2
GO:0032101	regulation of response to external stimulus	21	681	0.0045	ENSMUSP00000000193,ENSMUSP00000003635,ENSMUSP00000021271,ENSMUSP00000022368,ENSMUSP00000029623,ENSMUSP00000031327,ENSMUSP00000033056,ENSMUSP00000034472,ENSMUSP00000035065,ENSMUSP00000035120,ENSMUSP00000046787,ENSMUSP00000048736,ENSMUSP00000053092,ENSMUSP00000056008,ENSMUSP00000057563,ENSMUSP00000057815,ENSMUSP00000066488,ENSMUSP00000068834,ENSMUSP00000088031,ENSMUSP00000099423,ENSMUSP00000112776	Agt,Cck,Ccl2,Ccr7,Cxcl1,Gp1ba,Ier3,Il17c,Jam3,Nr1d2,Nr1h4,Per1,Plau,Ptger4,Ptgs2,Pycard,Robo2,Tbr1,Tlr2,Trib1,Zfp36
GO:0043434	response to peptide hormone	14	352	0.0047	ENSMUSP00000000193,ENSMUSP00000020171,ENSMUSP00000020692,ENSMUSP00000021552,ENSMUSP00000021635,ENSMUSP00000023779,ENSMUSP00000029270,ENSMUSP00000031325,ENSMUSP00000035065,ENSMUSP00000041053,ENSMUSP00000069616,ENSMUSP00000114074,ENSMUSP00000125729,ENSMUSP00000140890	Adm,Akr1c18,Areg,Btg2,Ccl2,Ccna2,Ctgf,Egr1,Egr2,Nr4a1,Ptgs2,Sgk1,Usf1,Zfp36l1
GO:0009889	regulation of biosynthetic process	69	3613	0.0049	ENSMUSP00000000080,ENSMUSP00000000193,ENSMUSP00000003635,ENSMUSP00000009340,ENSMUSP00000020171,ENSMUSP00000020298,ENSMUSP00000020692,ENSMUSP00000021271,ENSMUSP00000021552,ENSMUSP00000021635,ENSMUSP00000021674,ENSMUSP00000023024,ENSMUSP00000023779,ENSMUSP00000025025,ENSMUSP00000025363,ENSMUSP00000025718,ENSMUSP00000025850,ENSMUSP00000026999,ENSMUSP00000029270,ENSMUSP00000029623,ENSMUSP00000032107,…	Ablim1,Adam33,Agt,Akr1c18,Ankrd1,Arnt2,Btg2,Ccl2,Ccna2,Ccr7,Cited2,Creb5,Csrnp1,Ctgf,Dbp,Dnmt3l,Dusp1,Eda2r,Egr1,Egr2,Egr3,Eif4ebp3,Etv1,Fos,Fosl1,Gpr110,Hbegf,Hist1h1d,Ier2,Ier3,Inpp5d,Jun,Junb,Kbtbd8,Klf2,Klf6,Lif,Mapk15,Mnda,Nfkbiz,Nr1d1,Nr1d2,Nr1h4,Nr3c2,Nr4a1,Nr6a1,Pcbd1,Per1,Per2,Per3,Pias1,Plk3,Ppp1r15a,Ptger4,Ptgs2,Pycard,S100b,Smad7,Sp100,Sp110,Tbr1,Tef,Tlr2,Trib1,Trim30a,Usf1,Zfp322a,Zf…
GO:0031099	regeneration	9	156	0.0049	ENSMUSP00000000193,ENSMUSP00000022368,ENSMUSP00000025691,ENSMUSP00000029270,ENSMUSP00000034472,ENSMUSP00000037246,ENSMUSP00000067066,ENSMUSP00000102711,ENSMUSP00000140890	Adm,Ccl2,Ccna2,Fas,Igsf10,Jam3,Jun,Lif,Plau
GO:0065009	regulation of molecular function	61	3081	0.0049	ENSMUSP00000000193,ENSMUSP00000006614,ENSMUSP00000017881,ENSMUSP00000020118,ENSMUSP00000020171,ENSMUSP00000020298,ENSMUSP00000022212,ENSMUSP00000022368,ENSMUSP00000022709,ENSMUSP00000023779,ENSMUSP00000025025,ENSMUSP00000025295,ENSMUSP00000025363,ENSMUSP00000025691,ENSMUSP00000025850,ENSMUSP00000026999,ENSMUSP00000029623,ENSMUSP00000031325,ENSMUSP00000031327,ENSMUSP00000033056,ENSMUSP00000035065,…	Acrbp,Adm,Adra2a,Agt,Akap5,Ank3,Areg,Arhgef28,Camsap3,Ccdc37,Cck,Ccl2,Ccr7,Chad,Cox17,Ctgf,Cxcl1,Dnmt3l,Dusp1,Dusp6,Eda2r,Egr1,Epha1,Epha2,Fas,Flrt1,Fosl1,Gp1ba,Gpr110,Hbegf,Il17c,Jun,Lif,Lrrc19,Mapk15,Mmp9,Ngef,Nppb,Nr1h4,Nr4a1,Pcbd1,Per2,Plau,Plk2,Ppp1r15a,Ptgs2,Ptn,Pycard,Ramp3,Serpinb1a,Shank3,Slc30a1,Smad7,Spry1,Spry2,Spry4,Stac3,Tlr2,Trib1,Wfikkn1,Zfp36
GO:0048167	regulation of synaptic plasticity	10	193	0.0051	ENSMUSP00000009727,ENSMUSP00000017881,ENSMUSP00000022212,ENSMUSP00000035065,ENSMUSP00000041053,ENSMUSP00000047968,ENSMUSP00000066488,ENSMUSP00000069616,ENSMUSP00000099073,ENSMUSP00000104932	Agt,Egr1,Egr2,Mmp9,Plk2,Ptgs2,Ptn,S100b,Shank3,Syngr1
GO:1901654	response to ketone	10	193	0.0051	ENSMUSP00000000193,ENSMUSP00000021635,ENSMUSP00000021674,ENSMUSP00000025025,ENSMUSP00000025850,ENSMUSP00000048736,ENSMUSP00000064823,ENSMUSP00000099073,ENSMUSP00000099423,ENSMUSP00000100045	Akr1b3,Akr1c18,Ccl2,Ccr7,Dusp1,Fos,Fosl1,Klf2,Ptger4,Ptn
GO:0002376	immune system process	39	1703	0.0054	ENSMUSP00000000193,ENSMUSP00000006614,ENSMUSP00000017881,ENSMUSP00000021458,ENSMUSP00000021552,ENSMUSP00000025197,ENSMUSP00000025691,ENSMUSP00000029574,ENSMUSP00000029623,ENSMUSP00000031327,ENSMUSP00000031540,ENSMUSP00000033056,ENSMUSP00000034472,ENSMUSP00000038405,ENSMUSP00000047393,ENSMUSP00000048736,ENSMUSP00000053092,ENSMUSP00000054938,ENSMUSP00000056008,ENSMUSP00000057844,ENSMUSP00000064680,…	Blnk,Bpgm,C1s1,Ccl2,Ccr7,Cd300lb,Cited2,Cxcl1,Egr1,Epha2,Fas,Gbp2,Gbp3,H60b,Ifit3,Il17c,Inpp5d,Jam3,Jun,Junb,Klf2,Lif,Matk,Mmp9,Nfkbiz,Nr1h4,Oasl1,P2ry14,Ptger4,Pycard,Sp110,Sptb,Tap2,Tlr2,Tnfrsf18,Tnfrsf26,Trim30a,Vcam1,Zfp36l1
GO:0031400	negative regulation of protein modification process	19	595	0.0056	ENSMUSP00000020118,ENSMUSP00000021271,ENSMUSP00000022709,ENSMUSP00000025025,ENSMUSP00000025295,ENSMUSP00000026999,ENSMUSP00000033056,ENSMUSP00000039950,ENSMUSP00000047844,ENSMUSP00000049292,ENSMUSP00000049488,ENSMUSP00000057563,ENSMUSP00000066620,ENSMUSP00000067066,ENSMUSP00000068834,ENSMUSP00000073099,ENSMUSP00000102711,ENSMUSP00000102718,ENSMUSP00000109010	Chad,Dusp1,Dusp6,Epha1,Flrt1,Gp1ba,Jun,Lif,Lrrc19,Per1,Per2,Pmepa1,Ppp1r15a,Pycard,Smad7,Spry1,Spry2,Spry4,Trib1
GO:0071219	cellular response to molecule of bacterial origin	9	160	0.0057	ENSMUSP00000000193,ENSMUSP00000025718,ENSMUSP00000029623,ENSMUSP00000033056,ENSMUSP00000053092,ENSMUSP00000057815,ENSMUSP00000069505,ENSMUSP00000073913,ENSMUSP00000132435	Ankrd1,Ccl2,Cd300lb,Gbp2,Nr1d1,Nr1h4,Pycard,Tlr2,Zfp36
GO:0071356	cellular response to tumor necrosis factor	9	160	0.0057	ENSMUSP00000000193,ENSMUSP00000021552,ENSMUSP00000025691,ENSMUSP00000025718,ENSMUSP00000033056,ENSMUSP00000054938,ENSMUSP00000057815,ENSMUSP00000064823,ENSMUSP00000099462	Ankrd1,Ccl2,Fas,Klf2,Pycard,Tnfrsf18,Tnfrsf26,Zfp36,Zfp36l1
GO:0008285	negative regulation of cell population proliferation	20	648	0.0059	ENSMUSP00000017881,ENSMUSP00000020692,ENSMUSP00000022709,ENSMUSP00000025025,ENSMUSP00000025850,ENSMUSP00000029623,ENSMUSP00000035065,ENSMUSP00000038405,ENSMUSP00000045629,ENSMUSP00000049292,ENSMUSP00000066488,ENSMUSP00000066620,ENSMUSP00000067066,ENSMUSP00000068834,ENSMUSP00000099073,ENSMUSP00000099521,ENSMUSP00000099889,ENSMUSP00000102711,ENSMUSP00000127941,ENSMUSP00000140890	A4gnt,Adm,Agt,Btg2,Cited2,Dusp1,Fosl1,Ifit3,Inpp5d,Jun,Lif,Mmp9,Nppb,Per2,Ptgs2,Ptn,Spry1,Spry2,Tlr2,Trib1
GO:0045639	positive regulation of myeloid cell differentiation	7	95	0.0059	ENSMUSP00000021552,ENSMUSP00000021674,ENSMUSP00000067066,ENSMUSP00000068834,ENSMUSP00000102711,ENSMUSP00000105693,ENSMUSP00000127941	Fos,Gpr68,Inpp5d,Jun,Lif,Trib1,Zfp36l1
GO:0006955	immune response	25	914	0.006	ENSMUSP00000000193,ENSMUSP00000025197,ENSMUSP00000025691,ENSMUSP00000029623,ENSMUSP00000031327,ENSMUSP00000031540,ENSMUSP00000033056,ENSMUSP00000034472,ENSMUSP00000048736,ENSMUSP00000053092,ENSMUSP00000054938,ENSMUSP00000057844,ENSMUSP00000067066,ENSMUSP00000076189,ENSMUSP00000088642,ENSMUSP00000091226,ENSMUSP00000099423,ENSMUSP00000099462,ENSMUSP00000099889,ENSMUSP00000101828,ENSMUSP00000113221,…	Blnk,C1s1,Ccl2,Ccr7,Cxcl1,Fas,Gbp2,Gbp3,H60b,Ifit3,Inpp5d,Jam3,Lif,Matk,Nr1h4,Oasl1,P2ry14,Ptger4,Pycard,Sp110,Tap2,Tlr2,Tnfrsf18,Tnfrsf26,Trim30a
GO:0007167	enzyme linked receptor protein signaling pathway	18	551	0.006	ENSMUSP00000000193,ENSMUSP00000006614,ENSMUSP00000020171,ENSMUSP00000021674,ENSMUSP00000025363,ENSMUSP00000026999,ENSMUSP00000031325,ENSMUSP00000035101,ENSMUSP00000038405,ENSMUSP00000057844,ENSMUSP00000066894,ENSMUSP00000067066,ENSMUSP00000069616,ENSMUSP00000073099,ENSMUSP00000099521,ENSMUSP00000102711,ENSMUSP00000109010,ENSMUSP00000113221	Areg,Blnk,Ccl2,Cited2,Csrnp1,Ctgf,Egr1,Epha1,Epha2,Flrt1,Fos,Hbegf,Jun,Lif,Matk,Ngef,Nppb,Smad7
GO:0010557	positive regulation of macromolecule biosynthetic process	39	1717	0.006	ENSMUSP00000000080,ENSMUSP00000000193,ENSMUSP00000020298,ENSMUSP00000021271,ENSMUSP00000021674,ENSMUSP00000023024,ENSMUSP00000023779,ENSMUSP00000025718,ENSMUSP00000025850,ENSMUSP00000029270,ENSMUSP00000029623,ENSMUSP00000035101,ENSMUSP00000037042,ENSMUSP00000038405,ENSMUSP00000038532,ENSMUSP00000041053,ENSMUSP00000046787,ENSMUSP00000048736,ENSMUSP00000049488,ENSMUSP00000053092,ENSMUSP00000060275,…	Ablim1,Agt,Ankrd1,Arnt2,Ccl2,Ccna2,Ccr7,Cited2,Creb5,Csrnp1,Dbp,Egr1,Egr2,Egr3,Etv1,Fos,Fosl1,Ier2,Jun,Junb,Klf2,Klf6,Lif,Mapk15,Nr1d1,Nr1d2,Nr1h4,Nr4a1,Nr6a1,Pcbd1,Per1,Per2,Pias1,Ppp1r15a,Ptger4,Tbr1,Tef,Tlr2,Usf1
GO:0032652	regulation of interleukin-1 production	6	67	0.006	ENSMUSP00000029623,ENSMUSP00000033056,ENSMUSP00000048736,ENSMUSP00000053092,ENSMUSP00000069616,ENSMUSP00000099423	Ccr7,Egr1,Nr1h4,Ptger4,Pycard,Tlr2
GO:0034614	cellular response to reactive oxygen species	8	127	0.006	ENSMUSP00000017881,ENSMUSP00000021635,ENSMUSP00000021674,ENSMUSP00000029270,ENSMUSP00000064823,ENSMUSP00000067013,ENSMUSP00000100045,ENSMUSP00000102711	Akr1b3,Akr1c18,Ccna2,Fos,Jun,Klf2,Mmp9,Rhob
GO:0044092	negative regulation of molecular function	28	1078	0.006	ENSMUSP00000017881,ENSMUSP00000020118,ENSMUSP00000022709,ENSMUSP00000023779,ENSMUSP00000025025,ENSMUSP00000025295,ENSMUSP00000026999,ENSMUSP00000033056,ENSMUSP00000035065,ENSMUSP00000047518,ENSMUSP00000047844,ENSMUSP00000049292,ENSMUSP00000049488,ENSMUSP00000053092,ENSMUSP00000057563,ENSMUSP00000057815,ENSMUSP00000066488,ENSMUSP00000066620,ENSMUSP00000068834,ENSMUSP00000073099,ENSMUSP00000075690,…	Agt,Akap5,Ank3,Camsap3,Chad,Dusp1,Dusp6,Epha1,Flrt1,Gp1ba,Jun,Lrrc19,Mmp9,Nr1h4,Nr4a1,Per2,Ppp1r15a,Ptgs2,Pycard,Ramp3,Serpinb1a,Smad7,Spry1,Spry2,Spry4,Trib1,Wfikkn1,Zfp36
GO:0044344	cellular response to fibroblast growth factor stimulus	6	67	0.006	ENSMUSP00000020171,ENSMUSP00000021552,ENSMUSP00000023779,ENSMUSP00000037042,ENSMUSP00000057815,ENSMUSP00000109010	Ctgf,Egr3,Flrt1,Nr4a1,Zfp36,Zfp36l1
GO:0048168	regulation of neuronal synaptic plasticity	6	67	0.006	ENSMUSP00000009727,ENSMUSP00000041053,ENSMUSP00000047968,ENSMUSP00000066488,ENSMUSP00000069616,ENSMUSP00000104932	Agt,Egr1,Egr2,S100b,Shank3,Syngr1
GO:1903508	positive regulation of nucleic acid-templated transcription	35	1477	0.006	ENSMUSP00000000080,ENSMUSP00000020298,ENSMUSP00000021271,ENSMUSP00000021674,ENSMUSP00000023024,ENSMUSP00000023779,ENSMUSP00000025718,ENSMUSP00000025850,ENSMUSP00000029270,ENSMUSP00000029623,ENSMUSP00000035101,ENSMUSP00000037042,ENSMUSP00000038405,ENSMUSP00000038532,ENSMUSP00000041053,ENSMUSP00000046787,ENSMUSP00000049488,ENSMUSP00000053092,ENSMUSP00000060275,ENSMUSP00000064680,ENSMUSP00000064823,…	Ablim1,Agt,Ankrd1,Arnt2,Ccna2,Cited2,Creb5,Csrnp1,Dbp,Egr1,Egr2,Egr3,Etv1,Fos,Fosl1,Ier2,Jun,Junb,Klf2,Klf6,Lif,Nr1d1,Nr1d2,Nr1h4,Nr4a1,Nr6a1,Pcbd1,Per1,Per2,Pias1,Ppp1r15a,Tbr1,Tef,Tlr2,Usf1
GO:1901698	response to nitrogen compound	26	971	0.0063	ENSMUSP00000000193,ENSMUSP00000020171,ENSMUSP00000020692,ENSMUSP00000021271,ENSMUSP00000021552,ENSMUSP00000021635,ENSMUSP00000021674,ENSMUSP00000023779,ENSMUSP00000025025,ENSMUSP00000025850,ENSMUSP00000029270,ENSMUSP00000029623,ENSMUSP00000031325,ENSMUSP00000035065,ENSMUSP00000041053,ENSMUSP00000053092,ENSMUSP00000064680,ENSMUSP00000064823,ENSMUSP00000069616,ENSMUSP00000099073,ENSMUSP00000099423,…	Adm,Akr1b3,Akr1c18,Areg,Btg2,Ccl2,Ccna2,Ccr7,Ctgf,Dusp1,Egr1,Egr2,Fos,Fosl1,Jun,Junb,Klf2,Nr1h4,Nr4a1,Per1,Ptgs2,Ptn,Sgk1,Tlr2,Usf1,Zfp36l1
GO:0009891	positive regulation of biosynthetic process	41	1847	0.0064	ENSMUSP00000000080,ENSMUSP00000000193,ENSMUSP00000020171,ENSMUSP00000020298,ENSMUSP00000021271,ENSMUSP00000021674,ENSMUSP00000023024,ENSMUSP00000023779,ENSMUSP00000025718,ENSMUSP00000025850,ENSMUSP00000029270,ENSMUSP00000029623,ENSMUSP00000035065,ENSMUSP00000035101,ENSMUSP00000037042,ENSMUSP00000038405,ENSMUSP00000038532,ENSMUSP00000041053,ENSMUSP00000046787,ENSMUSP00000048736,ENSMUSP00000049488,…	Ablim1,Agt,Ankrd1,Arnt2,Ccl2,Ccna2,Ccr7,Cited2,Creb5,Csrnp1,Ctgf,Dbp,Egr1,Egr2,Egr3,Etv1,Fos,Fosl1,Ier2,Jun,Junb,Klf2,Klf6,Lif,Mapk15,Nr1d1,Nr1d2,Nr1h4,Nr4a1,Nr6a1,Pcbd1,Per1,Per2,Pias1,Ppp1r15a,Ptger4,Ptgs2,Tbr1,Tef,Tlr2,Usf1
GO:0044703	multi-organism reproductive process	25	919	0.0065	ENSMUSP00000000193,ENSMUSP00000000421,ENSMUSP00000007248,ENSMUSP00000008626,ENSMUSP00000017881,ENSMUSP00000021635,ENSMUSP00000021674,ENSMUSP00000023610,ENSMUSP00000025850,ENSMUSP00000034472,ENSMUSP00000035065,ENSMUSP00000036203,ENSMUSP00000036347,ENSMUSP00000038405,ENSMUSP00000060893,ENSMUSP00000064680,ENSMUSP00000066488,ENSMUSP00000067066,ENSMUSP00000085632,ENSMUSP00000093622,ENSMUSP00000096248,…	Acrbp,Adamts1,Adm,Adra2a,Agt,Akr1b3,Akr1c18,Ccl2,Ccnb1ip1,Cited2,Dnmt3l,Fos,Fosl1,Gpr149,Hspa1l,Jam3,Junb,Lif,Mmp9,Nr6a1,Pias1,Ptgs2,Rnf151,Shcbp1l,Tssk3
GO:0071560	cellular response to transforming growth factor beta stimulus	8	130	0.0065	ENSMUSP00000000193,ENSMUSP00000021552,ENSMUSP00000021635,ENSMUSP00000021674,ENSMUSP00000025718,ENSMUSP00000026999,ENSMUSP00000038405,ENSMUSP00000102711	Akr1c18,Ankrd1,Ccl2,Cited2,Fos,Jun,Smad7,Zfp36l1
GO:0043408	regulation of MAPK cascade	21	709	0.0066	ENSMUSP00000000193,ENSMUSP00000006614,ENSMUSP00000020118,ENSMUSP00000020171,ENSMUSP00000021271,ENSMUSP00000022709,ENSMUSP00000025025,ENSMUSP00000025295,ENSMUSP00000025691,ENSMUSP00000026672,ENSMUSP00000029623,ENSMUSP00000033056,ENSMUSP00000036203,ENSMUSP00000047518,ENSMUSP00000049292,ENSMUSP00000066488,ENSMUSP00000067066,ENSMUSP00000068834,ENSMUSP00000099423,ENSMUSP00000102711,ENSMUSP00000109463	Adra2a,Agt,Ccl2,Ccr7,Ctgf,Dusp1,Dusp6,Eda2r,Epha2,Fas,Jun,Lif,Pde8a,Per1,Pycard,Ramp3,Spry1,Spry2,Spry4,Tlr2,Trib1
GO:1902105	regulation of leukocyte differentiation	12	284	0.0068	ENSMUSP00000021552,ENSMUSP00000021674,ENSMUSP00000025691,ENSMUSP00000026999,ENSMUSP00000037042,ENSMUSP00000067066,ENSMUSP00000068834,ENSMUSP00000099423,ENSMUSP00000102711,ENSMUSP00000105693,ENSMUSP00000110102,ENSMUSP00000127941	Ccr7,Egr3,Fas,Fos,Gpr68,Inpp5d,Jun,Lif,Nfkbiz,Smad7,Trib1,Zfp36l1
GO:0009968	negative regulation of signal transduction	29	1147	0.0069	ENSMUSP00000003635,ENSMUSP00000006614,ENSMUSP00000017881,ENSMUSP00000020118,ENSMUSP00000021271,ENSMUSP00000022709,ENSMUSP00000023750,ENSMUSP00000025025,ENSMUSP00000025295,ENSMUSP00000026999,ENSMUSP00000033056,ENSMUSP00000035065,ENSMUSP00000039950,ENSMUSP00000047518,ENSMUSP00000047844,ENSMUSP00000049292,ENSMUSP00000053092,ENSMUSP00000057563,ENSMUSP00000066488,ENSMUSP00000067066,ENSMUSP00000068834,…	Adm,Agt,Chad,Dusp1,Dusp6,Egr1,Epha2,Faim2,Flrt1,Gp1ba,Ier3,Inpp5d,Lif,Lrrc19,Mmp9,Nr1d1,Nr1h4,Per1,Pmepa1,Ptgs2,Pycard,Ramp3,Smad7,Spry1,Spry2,Spry4,Trib1,Trim30a,Wfikkn1
GO:0042493	response to drug	25	926	0.007	ENSMUSP00000000193,ENSMUSP00000017881,ENSMUSP00000020102,ENSMUSP00000020118,ENSMUSP00000021635,ENSMUSP00000021674,ENSMUSP00000025025,ENSMUSP00000025718,ENSMUSP00000025850,ENSMUSP00000028160,ENSMUSP00000029270,ENSMUSP00000029623,ENSMUSP00000031325,ENSMUSP00000035065,ENSMUSP00000064680,ENSMUSP00000064823,ENSMUSP00000067013,ENSMUSP00000069616,ENSMUSP00000087098,ENSMUSP00000090710,ENSMUSP00000099073,…	Akr1b3,Akr1c18,Ankrd1,Areg,Ccl2,Ccna2,Ccr7,Dusp1,Dusp6,Egr1,Fos,Fosl1,Jun,Junb,Klf2,Mapk15,Mmp9,Ptgs2,Ptn,Rhob,Slc17a8,Slc25a18,Slc25a25,Slc47a2,Tlr2
GO:0050877	nervous system process	26	981	0.007	ENSMUSP00000004389,ENSMUSP00000020102,ENSMUSP00000020692,ENSMUSP00000021674,ENSMUSP00000022212,ENSMUSP00000022709,ENSMUSP00000025850,ENSMUSP00000029623,ENSMUSP00000034472,ENSMUSP00000035065,ENSMUSP00000036203,ENSMUSP00000041053,ENSMUSP00000046787,ENSMUSP00000047968,ENSMUSP00000049380,ENSMUSP00000066488,ENSMUSP00000069616,ENSMUSP00000090089,ENSMUSP00000096248,ENSMUSP00000099073,ENSMUSP00000102711,…	Adra2a,Agt,Ank3,Btg2,Egr1,Egr2,Fos,Fosl1,Gpr110,Grcc10,Jam3,Jun,Myo7a,Pias1,Pkd1l3,Plk2,Ptgs2,Ptn,Rpgrip1,S100b,Sgk1,Shank3,Slc17a8,Spry2,Tbr1,Tlr2
GO:0070373	negative regulation of ERK1 and ERK2 cascade	6	71	0.0074	ENSMUSP00000020118,ENSMUSP00000022709,ENSMUSP00000025025,ENSMUSP00000025295,ENSMUSP00000049292,ENSMUSP00000067066	Dusp1,Dusp6,Lif,Spry1,Spry2,Spry4
GO:0031326	regulation of cellular biosynthetic process	67	3549	0.0075	ENSMUSP00000000080,ENSMUSP00000003635,ENSMUSP00000009340,ENSMUSP00000020298,ENSMUSP00000020692,ENSMUSP00000021271,ENSMUSP00000021552,ENSMUSP00000021635,ENSMUSP00000021674,ENSMUSP00000023024,ENSMUSP00000023779,ENSMUSP00000025025,ENSMUSP00000025363,ENSMUSP00000025718,ENSMUSP00000025850,ENSMUSP00000026999,ENSMUSP00000029270,ENSMUSP00000029623,ENSMUSP00000032107,ENSMUSP00000033056,ENSMUSP00000035065,…	Ablim1,Adam33,Agt,Akr1c18,Ankrd1,Arnt2,Btg2,Ccna2,Ccr7,Cited2,Creb5,Csrnp1,Dbp,Dnmt3l,Dusp1,Eda2r,Egr1,Egr2,Egr3,Eif4ebp3,Etv1,Fos,Fosl1,Gpr110,Hbegf,Hist1h1d,Ier2,Ier3,Inpp5d,Jun,Junb,Kbtbd8,Klf2,Klf6,Lif,Mapk15,Mnda,Nfkbiz,Nr1d1,Nr1d2,Nr1h4,Nr3c2,Nr4a1,Nr6a1,Pcbd1,Per1,Per2,Per3,Pias1,Plk3,Ppp1r15a,Ptger4,Ptgs2,Pycard,S100b,Smad7,Sp100,Sp110,Tbr1,Tef,Tlr2,Trib1,Trim30a,Usf1,Zfp322a,Zfp36,Zfp36l1
GO:0002684	positive regulation of immune system process	22	771	0.0076	ENSMUSP00000000193,ENSMUSP00000017881,ENSMUSP00000021552,ENSMUSP00000021674,ENSMUSP00000025197,ENSMUSP00000029574,ENSMUSP00000029623,ENSMUSP00000031327,ENSMUSP00000033056,ENSMUSP00000037042,ENSMUSP00000048736,ENSMUSP00000053092,ENSMUSP00000067066,ENSMUSP00000068834,ENSMUSP00000073913,ENSMUSP00000099423,ENSMUSP00000099462,ENSMUSP00000102711,ENSMUSP00000105693,ENSMUSP00000110102,ENSMUSP00000125531,…	C1s1,Ccl2,Ccr7,Cd300lb,Cxcl1,Egr3,Fos,Gpr68,Inpp5d,Jun,Lif,Mmp9,Nfkbiz,Nr1h4,Ptger4,Pycard,Tap2,Tlr2,Tnfrsf18,Trib1,Vcam1,Zfp36l1
GO:0010556	regulation of macromolecule biosynthetic process	65	3417	0.0076	ENSMUSP00000000080,ENSMUSP00000000193,ENSMUSP00000009340,ENSMUSP00000020298,ENSMUSP00000020692,ENSMUSP00000021271,ENSMUSP00000021552,ENSMUSP00000021674,ENSMUSP00000023024,ENSMUSP00000023779,ENSMUSP00000025025,ENSMUSP00000025363,ENSMUSP00000025718,ENSMUSP00000025850,ENSMUSP00000026999,ENSMUSP00000029270,ENSMUSP00000029623,ENSMUSP00000032107,ENSMUSP00000033056,ENSMUSP00000035101,ENSMUSP00000037042,…	Ablim1,Adam33,Agt,Ankrd1,Arnt2,Btg2,Ccl2,Ccna2,Ccr7,Cited2,Creb5,Csrnp1,Dbp,Dnmt3l,Dusp1,Eda2r,Egr1,Egr2,Egr3,Eif4ebp3,Etv1,Fos,Fosl1,Gpr110,Hbegf,Hist1h1d,Ier2,Inpp5d,Jun,Junb,Kbtbd8,Klf2,Klf6,Lif,Mapk15,Mnda,Nfkbiz,Nr1d1,Nr1d2,Nr1h4,Nr3c2,Nr4a1,Nr6a1,Pcbd1,Per1,Per2,Per3,Pias1,Plk3,Ppp1r15a,Ptger4,Pycard,S100b,Smad7,Sp100,Sp110,Tbr1,Tef,Tlr2,Trib1,Trim30a,Usf1,Zfp322a,Zfp36,Zfp36l1
GO:2000379	positive regulation of reactive oxygen species metabolic process	7	101	0.0076	ENSMUSP00000021635,ENSMUSP00000022368,ENSMUSP00000029623,ENSMUSP00000031327,ENSMUSP00000035065,ENSMUSP00000064823,ENSMUSP00000066488	Agt,Akr1c18,Cxcl1,Klf2,Plau,Ptgs2,Tlr2
GO:1903706	regulation of hemopoiesis	14	377	0.0077	ENSMUSP00000021552,ENSMUSP00000021674,ENSMUSP00000025691,ENSMUSP00000026999,ENSMUSP00000031327,ENSMUSP00000037042,ENSMUSP00000057815,ENSMUSP00000067066,ENSMUSP00000068834,ENSMUSP00000099423,ENSMUSP00000102711,ENSMUSP00000105693,ENSMUSP00000110102,ENSMUSP00000127941	Ccr7,Cxcl1,Egr3,Fas,Fos,Gpr68,Inpp5d,Jun,Lif,Nfkbiz,Smad7,Trib1,Zfp36,Zfp36l1
GO:0010605	negative regulation of macromolecule metabolic process	49	2373	0.0078	ENSMUSP00000009340,ENSMUSP00000017881,ENSMUSP00000020118,ENSMUSP00000020171,ENSMUSP00000020692,ENSMUSP00000021271,ENSMUSP00000021552,ENSMUSP00000022709,ENSMUSP00000023779,ENSMUSP00000025025,ENSMUSP00000025295,ENSMUSP00000025363,ENSMUSP00000025718,ENSMUSP00000026999,ENSMUSP00000033056,ENSMUSP00000035065,ENSMUSP00000038405,ENSMUSP00000039298,ENSMUSP00000039950,ENSMUSP00000044395,ENSMUSP00000047844,…	Agt,Ankrd1,Btg2,Chad,Cited2,Ctgf,Dnmt3l,Dusp1,Dusp6,Egr1,Eif4ebp3,Epha1,Flrt1,Gp1ba,Hbegf,Hist1h1d,Inpp5d,Jun,Junb,Klf2,Lif,Lrrc19,Mapk15,Mmp9,Mnda,Nr1d1,Nr1d2,Nr1h4,Nr4a1,Nr6a1,Per1,Per2,Per3,Pias1,Plk3,Pmepa1,Ppp1r15a,Ptger4,Ptgs2,Pycard,Serpinb1a,Smad7,Spry1,Spry2,Spry4,Trib1,Wfikkn1,Zfp36,Zfp36l1
GO:0010628	positive regulation of gene expression	40	1811	0.0078	ENSMUSP00000000080,ENSMUSP00000020171,ENSMUSP00000020298,ENSMUSP00000021271,ENSMUSP00000021674,ENSMUSP00000022709,ENSMUSP00000023024,ENSMUSP00000023779,ENSMUSP00000025850,ENSMUSP00000029270,ENSMUSP00000029623,ENSMUSP00000035101,ENSMUSP00000037042,ENSMUSP00000038405,ENSMUSP00000038532,ENSMUSP00000041053,ENSMUSP00000046787,ENSMUSP00000047518,ENSMUSP00000048736,ENSMUSP00000049488,ENSMUSP00000053092,…	Ablim1,Agt,Ank3,Arnt2,Ccna2,Cited2,Creb5,Csrnp1,Ctgf,Dbp,Egr1,Egr2,Egr3,Etv1,Fos,Fosl1,Ier2,Jun,Junb,Klf2,Klf6,Lif,Nr1d1,Nr1d2,Nr1h4,Nr4a1,Nr6a1,Pcbd1,Per1,Pias1,Ppp1r15a,Ptger4,Ramp3,Rbm20,Spry2,Tbr1,Tef,Tlr2,Usf1,Zfp36
GO:0035809	regulation of urine volume	4	25	0.0078	ENSMUSP00000048736,ENSMUSP00000099521,ENSMUSP00000100045,ENSMUSP00000140890	Adm,Akr1b3,Nppb,Ptger4
GO:0046697	decidualization	4	25	0.0078	ENSMUSP00000035065,ENSMUSP00000038405,ENSMUSP00000064680,ENSMUSP00000067066	Cited2,Junb,Lif,Ptgs2
GO:0071276	cellular response to cadmium ion	4	25	0.0078	ENSMUSP00000017881,ENSMUSP00000021635,ENSMUSP00000021674,ENSMUSP00000102711	Akr1c18,Fos,Jun,Mmp9
GO:1905477	positive regulation of protein localization to membrane	7	102	0.0078	ENSMUSP00000000193,ENSMUSP00000006614,ENSMUSP00000047518,ENSMUSP00000048148,ENSMUSP00000090089,ENSMUSP00000093270,ENSMUSP00000099073	Akap5,Ank3,Ccl2,Epha2,Ptn,Ramp3,Stac3
GO:0001934	positive regulation of protein phosphorylation	25	937	0.0079	ENSMUSP00000000193,ENSMUSP00000017881,ENSMUSP00000020171,ENSMUSP00000022709,ENSMUSP00000025363,ENSMUSP00000025691,ENSMUSP00000026672,ENSMUSP00000029623,ENSMUSP00000031325,ENSMUSP00000033056,ENSMUSP00000035065,ENSMUSP00000035120,ENSMUSP00000036203,ENSMUSP00000047518,ENSMUSP00000048736,ENSMUSP00000049488,ENSMUSP00000066488,ENSMUSP00000067066,ENSMUSP00000069616,ENSMUSP00000087098,ENSMUSP00000093270,…	Adra2a,Agt,Akap5,Areg,Cck,Ccl2,Ccr7,Ctgf,Eda2r,Egr1,Fas,Hbegf,Jun,Lif,Mapk15,Mmp9,Pde8a,Ppp1r15a,Ptger4,Ptgs2,Pycard,Ramp3,Spry2,Tlr2,Tnfrsf18
GO:0007519	skeletal muscle tissue development	8	136	0.008	ENSMUSP00000020692,ENSMUSP00000021674,ENSMUSP00000023779,ENSMUSP00000025718,ENSMUSP00000038405,ENSMUSP00000041053,ENSMUSP00000048148,ENSMUSP00000069616	Ankrd1,Btg2,Cited2,Egr1,Egr2,Fos,Nr4a1,Stac3
GO:0032680	regulation of tumor necrosis factor production	8	136	0.008	ENSMUSP00000000193,ENSMUSP00000029623,ENSMUSP00000033056,ENSMUSP00000048736,ENSMUSP00000053092,ENSMUSP00000057815,ENSMUSP00000076189,ENSMUSP00000099423	Ccl2,Ccr7,Nr1h4,Ptger4,Pycard,Tlr2,Trim30a,Zfp36
GO:0001890	placenta development	9	175	0.0089	ENSMUSP00000021552,ENSMUSP00000025850,ENSMUSP00000029574,ENSMUSP00000035065,ENSMUSP00000038405,ENSMUSP00000064680,ENSMUSP00000067066,ENSMUSP00000121562,ENSMUSP00000140890	Adm,Cited2,Dnmt3l,Fosl1,Junb,Lif,Ptgs2,Vcam1,Zfp36l1
GO:0006935	chemotaxis	15	432	0.0089	ENSMUSP00000000193,ENSMUSP00000006614,ENSMUSP00000023779,ENSMUSP00000025363,ENSMUSP00000029574,ENSMUSP00000031327,ENSMUSP00000037042,ENSMUSP00000041053,ENSMUSP00000054938,ENSMUSP00000078336,ENSMUSP00000090089,ENSMUSP00000093442,ENSMUSP00000096775,ENSMUSP00000099423,ENSMUSP00000112776	Ablim1,Ank3,Ccl2,Ccr7,Cxcl1,Egr2,Egr3,Epha2,Etv1,Hbegf,Kif5a,Nr4a1,Robo2,Tnfrsf26,Vcam1
GO:0032880	regulation of protein localization	25	947	0.0089	ENSMUSP00000000193,ENSMUSP00000006614,ENSMUSP00000007248,ENSMUSP00000025718,ENSMUSP00000029623,ENSMUSP00000033056,ENSMUSP00000035065,ENSMUSP00000036203,ENSMUSP00000047518,ENSMUSP00000048148,ENSMUSP00000048736,ENSMUSP00000053092,ENSMUSP00000066399,ENSMUSP00000066488,ENSMUSP00000066620,ENSMUSP00000067066,ENSMUSP00000069505,ENSMUSP00000076130,ENSMUSP00000090089,ENSMUSP00000093270,ENSMUSP00000099073,…	Adra2a,Agt,Akap5,Ank3,Ankrd1,Ccl2,Ccr7,Epha2,Gpr68,Hspa1l,Lif,Nr1d1,Nr1h4,Per2,Plk3,Ptger4,Ptgs2,Ptn,Pycard,Ramp3,Sgk1,Shank3,Sp100,Stac3,Tlr2
GO:0043618	regulation of transcription from RNA polymerase II promoter in response to stress	5	49	0.0094	ENSMUSP00000038405,ENSMUSP00000049488,ENSMUSP00000064823,ENSMUSP00000069616,ENSMUSP00000102711	Cited2,Egr1,Jun,Klf2,Ppp1r15a
GO:0045893	positive regulation of transcription, DNA-templated	33	1413	0.0097	ENSMUSP00000000080,ENSMUSP00000020298,ENSMUSP00000021271,ENSMUSP00000021674,ENSMUSP00000023024,ENSMUSP00000023779,ENSMUSP00000025850,ENSMUSP00000029270,ENSMUSP00000029623,ENSMUSP00000035101,ENSMUSP00000037042,ENSMUSP00000038405,ENSMUSP00000038532,ENSMUSP00000041053,ENSMUSP00000046787,ENSMUSP00000049488,ENSMUSP00000053092,ENSMUSP00000060275,ENSMUSP00000064680,ENSMUSP00000064823,ENSMUSP00000066488,…	Ablim1,Agt,Arnt2,Ccna2,Cited2,Creb5,Csrnp1,Dbp,Egr1,Egr2,Egr3,Etv1,Fos,Fosl1,Ier2,Jun,Junb,Klf2,Klf6,Lif,Nr1d1,Nr1d2,Nr1h4,Nr4a1,Nr6a1,Pcbd1,Per1,Pias1,Ppp1r15a,Tbr1,Tef,Tlr2,Usf1
GO:0009887	animal organ morphogenesis	25	956	0.0099	ENSMUSP00000004389,ENSMUSP00000006614,ENSMUSP00000016172,ENSMUSP00000020171,ENSMUSP00000022709,ENSMUSP00000023610,ENSMUSP00000023611,ENSMUSP00000025718,ENSMUSP00000026999,ENSMUSP00000031325,ENSMUSP00000035101,ENSMUSP00000038405,ENSMUSP00000046787,ENSMUSP00000048230,ENSMUSP00000049292,ENSMUSP00000066488,ENSMUSP00000067066,ENSMUSP00000099073,ENSMUSP00000102711,ENSMUSP00000102745,ENSMUSP00000104932,…	Adamts1,Adamts5,Adm,Agt,Ankrd1,Areg,Celsr1,Cited2,Csrnp1,Ctgf,Epha2,Fam101a,Gcnt4,Grcc10,Jun,Lif,Myo7a,Ptn,Robo2,Rpgrip1,Shank3,Smad7,Spry1,Spry2,Tbr1
GO:0048609	multicellular organismal reproductive process	22	792	0.0099	ENSMUSP00000000193,ENSMUSP00000000421,ENSMUSP00000007248,ENSMUSP00000008626,ENSMUSP00000023610,ENSMUSP00000025850,ENSMUSP00000034472,ENSMUSP00000035065,ENSMUSP00000036347,ENSMUSP00000038405,ENSMUSP00000060893,ENSMUSP00000064680,ENSMUSP00000066488,ENSMUSP00000067066,ENSMUSP00000069616,ENSMUSP00000085632,ENSMUSP00000093622,ENSMUSP00000096248,ENSMUSP00000099073,ENSMUSP00000100045,ENSMUSP00000108498,…	Acrbp,Adamts1,Agt,Akr1b3,Ccl2,Ccnb1ip1,Cited2,Dnmt3l,Egr1,Fosl1,Gpr149,Hspa1l,Jam3,Junb,Lif,Nr6a1,Pias1,Ptgs2,Ptn,Rnf151,Shcbp1l,Tssk3
GO:0050727	regulation of inflammatory response	12	301	0.0099	ENSMUSP00000003635,ENSMUSP00000021271,ENSMUSP00000029623,ENSMUSP00000033056,ENSMUSP00000035065,ENSMUSP00000048736,ENSMUSP00000053092,ENSMUSP00000056008,ENSMUSP00000057815,ENSMUSP00000066488,ENSMUSP00000088031,ENSMUSP00000099423	Agt,Ccr7,Ier3,Il17c,Nr1d2,Nr1h4,Per1,Ptger4,Ptgs2,Pycard,Tlr2,Zfp36
GO:0071496	cellular response to external stimulus	12	301	0.0099	ENSMUSP00000000193,ENSMUSP00000017881,ENSMUSP00000021674,ENSMUSP00000025691,ENSMUSP00000025718,ENSMUSP00000025850,ENSMUSP00000035065,ENSMUSP00000048736,ENSMUSP00000053092,ENSMUSP00000099073,ENSMUSP00000102711,ENSMUSP00000125729	Ankrd1,Ccl2,Fas,Fos,Fosl1,Jun,Mmp9,Nr1h4,Ptger4,Ptgs2,Ptn,Usf1
GO:0001525	angiogenesis	12	303	0.0104	ENSMUSP00000000193,ENSMUSP00000006614,ENSMUSP00000020171,ENSMUSP00000022368,ENSMUSP00000023779,ENSMUSP00000025363,ENSMUSP00000034472,ENSMUSP00000035065,ENSMUSP00000037042,ENSMUSP00000067013,ENSMUSP00000073099,ENSMUSP00000102711	Ccl2,Ctgf,Egr3,Epha1,Epha2,Hbegf,Jam3,Jun,Nr4a1,Plau,Ptgs2,Rhob
GO:0002687	positive regulation of leukocyte migration	8	143	0.0104	ENSMUSP00000000193,ENSMUSP00000017881,ENSMUSP00000029623,ENSMUSP00000031327,ENSMUSP00000033056,ENSMUSP00000048736,ENSMUSP00000099423,ENSMUSP00000099462	Ccl2,Ccr7,Cxcl1,Mmp9,Ptger4,Pycard,Tlr2,Tnfrsf18
GO:0031347	regulation of defense response	17	538	0.0104	ENSMUSP00000003635,ENSMUSP00000021271,ENSMUSP00000025197,ENSMUSP00000029623,ENSMUSP00000031327,ENSMUSP00000033056,ENSMUSP00000035065,ENSMUSP00000048736,ENSMUSP00000053092,ENSMUSP00000056008,ENSMUSP00000057815,ENSMUSP00000066488,ENSMUSP00000069505,ENSMUSP00000076189,ENSMUSP00000088031,ENSMUSP00000099423,ENSMUSP00000104932	Agt,Ccr7,Cxcl1,Ier3,Il17c,Nr1d1,Nr1d2,Nr1h4,Per1,Ptger4,Ptgs2,Pycard,Shank3,Tap2,Tlr2,Trim30a,Zfp36
GO:0051403	stress-activated MAPK cascade	6	79	0.0111	ENSMUSP00000021552,ENSMUSP00000048736,ENSMUSP00000057815,ENSMUSP00000066488,ENSMUSP00000068834,ENSMUSP00000099423	Agt,Ccr7,Ptger4,Trib1,Zfp36,Zfp36l1
GO:0033554	cellular response to stress	32	1370	0.0113	ENSMUSP00000003635,ENSMUSP00000006614,ENSMUSP00000017881,ENSMUSP00000020692,ENSMUSP00000021552,ENSMUSP00000021635,ENSMUSP00000021674,ENSMUSP00000025691,ENSMUSP00000025718,ENSMUSP00000029270,ENSMUSP00000033056,ENSMUSP00000034472,ENSMUSP00000035065,ENSMUSP00000038405,ENSMUSP00000047968,ENSMUSP00000048736,ENSMUSP00000049488,ENSMUSP00000057815,ENSMUSP00000064823,ENSMUSP00000066488,ENSMUSP00000067013,…	Adm,Agt,Akr1b3,Akr1c18,Ankrd1,Btg2,Ccna2,Ccr7,Cited2,Egr1,Epha2,Fas,Fos,Ier3,Jam3,Jun,Klf2,Mapk15,Mmp9,Plk3,Ppp1r15a,Ptger4,Ptgs2,Ptn,Pycard,Rad52,Rhob,S100b,Sgk1,Trib1,Zfp36,Zfp36l1
GO:0031401	positive regulation of protein modification process	28	1142	0.0119	ENSMUSP00000000193,ENSMUSP00000017881,ENSMUSP00000020171,ENSMUSP00000022709,ENSMUSP00000025363,ENSMUSP00000025691,ENSMUSP00000026672,ENSMUSP00000026999,ENSMUSP00000029623,ENSMUSP00000031325,ENSMUSP00000033056,ENSMUSP00000035065,ENSMUSP00000035120,ENSMUSP00000036203,ENSMUSP00000047518,ENSMUSP00000048736,ENSMUSP00000049488,ENSMUSP00000066488,ENSMUSP00000067066,ENSMUSP00000068834,ENSMUSP00000069616,…	Adra2a,Agt,Akap5,Areg,Cck,Ccl2,Ccr7,Ctgf,Eda2r,Egr1,Fas,Hbegf,Jun,Lif,Mapk15,Mmp9,Pde8a,Pias1,Ppp1r15a,Ptger4,Ptgs2,Pycard,Ramp3,Smad7,Spry2,Tlr2,Tnfrsf18,Trib1
GO:0002573	myeloid leukocyte differentiation	7	113	0.0123	ENSMUSP00000006614,ENSMUSP00000029623,ENSMUSP00000038405,ENSMUSP00000056008,ENSMUSP00000064680,ENSMUSP00000099423,ENSMUSP00000102711	Ccr7,Cited2,Epha2,Il17c,Jun,Junb,Tlr2
GO:0046686	response to cadmium ion	5	53	0.0123	ENSMUSP00000017881,ENSMUSP00000021635,ENSMUSP00000021674,ENSMUSP00000042410,ENSMUSP00000102711	Akr1c18,Fos,Jun,Mmp9,Slc30a1
GO:0031328	positive regulation of cellular biosynthetic process	39	1807	0.0127	ENSMUSP00000000080,ENSMUSP00000020298,ENSMUSP00000021271,ENSMUSP00000021674,ENSMUSP00000023024,ENSMUSP00000023779,ENSMUSP00000025718,ENSMUSP00000025850,ENSMUSP00000029270,ENSMUSP00000029623,ENSMUSP00000035065,ENSMUSP00000035101,ENSMUSP00000037042,ENSMUSP00000038405,ENSMUSP00000038532,ENSMUSP00000041053,ENSMUSP00000046787,ENSMUSP00000048736,ENSMUSP00000049488,ENSMUSP00000053092,ENSMUSP00000060275,…	Ablim1,Agt,Ankrd1,Arnt2,Ccna2,Ccr7,Cited2,Creb5,Csrnp1,Dbp,Egr1,Egr2,Egr3,Etv1,Fos,Fosl1,Ier2,Jun,Junb,Klf2,Klf6,Lif,Mapk15,Nr1d1,Nr1d2,Nr1h4,Nr4a1,Nr6a1,Pcbd1,Per1,Per2,Pias1,Ppp1r15a,Ptger4,Ptgs2,Tbr1,Tef,Tlr2,Usf1
GO:0010469	regulation of signaling receptor activity	17	550	0.0128	ENSMUSP00000000193,ENSMUSP00000020171,ENSMUSP00000022368,ENSMUSP00000025363,ENSMUSP00000031325,ENSMUSP00000031327,ENSMUSP00000035120,ENSMUSP00000036203,ENSMUSP00000047518,ENSMUSP00000056008,ENSMUSP00000066488,ENSMUSP00000067066,ENSMUSP00000093141,ENSMUSP00000099073,ENSMUSP00000099521,ENSMUSP00000104932,ENSMUSP00000140890	Adm,Adra2a,Agt,Areg,Cck,Ccl2,Ctgf,Cxcl1,Hbegf,Il17c,Lif,Nppb,Plau,Ptn,Ramp3,Shank3,Wfikkn1
GO:0010565	regulation of cellular ketone metabolic process	7	114	0.0128	ENSMUSP00000000984,ENSMUSP00000021635,ENSMUSP00000035065,ENSMUSP00000053092,ENSMUSP00000066488,ENSMUSP00000069505,ENSMUSP00000069616	Agt,Akr1c18,Egr1,Nr1d1,Nr1h4,Ptgs2,Slc7a7
GO:0031102	neuron projection regeneration	4	30	0.0128	ENSMUSP00000025691,ENSMUSP00000034472,ENSMUSP00000102711,ENSMUSP00000140890	Adm,Fas,Jam3,Jun
GO:0051093	negative regulation of developmental process	25	979	0.0129	ENSMUSP00000000193,ENSMUSP00000006614,ENSMUSP00000021552,ENSMUSP00000022212,ENSMUSP00000022709,ENSMUSP00000023610,ENSMUSP00000026999,ENSMUSP00000029623,ENSMUSP00000031325,ENSMUSP00000038405,ENSMUSP00000047844,ENSMUSP00000047968,ENSMUSP00000048230,ENSMUSP00000048736,ENSMUSP00000052085,ENSMUSP00000054938,ENSMUSP00000057815,ENSMUSP00000064823,ENSMUSP00000066488,ENSMUSP00000066894,ENSMUSP00000067066,…	Adamts1,Agt,Areg,Ccl2,Chad,Cited2,Daam2,Epha2,Fam101a,Gpr68,Inpp5d,Klf2,Lif,Ngef,Plk2,Ptger4,Ptn,S100b,Smad7,Spry2,Tlr2,Tnfrsf26,Trib1,Zfp36,Zfp36l1
GO:0045444	fat cell differentiation	7	115	0.0132	ENSMUSP00000016315,ENSMUSP00000023779,ENSMUSP00000035065,ENSMUSP00000038532,ENSMUSP00000041053,ENSMUSP00000066620,ENSMUSP00000096248	Creb5,Egr2,Lamb3,Nr4a1,Per2,Pias1,Ptgs2
GO:0000122	negative regulation of transcription by RNA polymerase II	22	817	0.0134	ENSMUSP00000009340,ENSMUSP00000020692,ENSMUSP00000021271,ENSMUSP00000025718,ENSMUSP00000026999,ENSMUSP00000038405,ENSMUSP00000044395,ENSMUSP00000049488,ENSMUSP00000053092,ENSMUSP00000057815,ENSMUSP00000064680,ENSMUSP00000064823,ENSMUSP00000066620,ENSMUSP00000069505,ENSMUSP00000069616,ENSMUSP00000076130,ENSMUSP00000087098,ENSMUSP00000088031,ENSMUSP00000096248,ENSMUSP00000099493,ENSMUSP00000102711,…	Ankrd1,Btg2,Cited2,Egr1,Hist1h1d,Jun,Junb,Klf2,Mapk15,Mnda,Nr1d1,Nr1d2,Nr1h4,Nr6a1,Per1,Per2,Per3,Pias1,Plk3,Ppp1r15a,Smad7,Zfp36
GO:0001818	negative regulation of cytokine production	10	229	0.0134	ENSMUSP00000006614,ENSMUSP00000026999,ENSMUSP00000029623,ENSMUSP00000033056,ENSMUSP00000048736,ENSMUSP00000053092,ENSMUSP00000057815,ENSMUSP00000064823,ENSMUSP00000076189,ENSMUSP00000127941	Epha2,Inpp5d,Klf2,Nr1h4,Ptger4,Pycard,Smad7,Tlr2,Trim30a,Zfp36
GO:0031670	cellular response to nutrient	5	55	0.0138	ENSMUSP00000000193,ENSMUSP00000035065,ENSMUSP00000053092,ENSMUSP00000099073,ENSMUSP00000125729	Ccl2,Nr1h4,Ptgs2,Ptn,Usf1
GO:0022610	biological adhesion	20	712	0.0139	ENSMUSP00000006614,ENSMUSP00000016172,ENSMUSP00000016315,ENSMUSP00000020171,ENSMUSP00000021552,ENSMUSP00000024699,ENSMUSP00000029574,ENSMUSP00000034472,ENSMUSP00000045142,ENSMUSP00000057563,ENSMUSP00000066488,ENSMUSP00000066880,ENSMUSP00000067013,ENSMUSP00000073099,ENSMUSP00000082137,ENSMUSP00000101828,ENSMUSP00000109010,ENSMUSP00000112776,ENSMUSP00000125993,ENSMUSP00000132435	Agt,Amigo3,Cadm4,Camsap3,Celsr1,Cldn6,Ctgf,Epha1,Epha2,Flrt1,Gbp2,Gbp3,Gp1ba,Islr,Jam3,Lamb3,Rhob,Robo2,Vcam1,Zfp36l1
GO:0045659	negative regulation of neutrophil differentiation	2	2	0.0139	ENSMUSP00000068834,ENSMUSP00000127941	Inpp5d,Trib1
GO:0071222	cellular response to lipopolysaccharide	8	152	0.0139	ENSMUSP00000000193,ENSMUSP00000025718,ENSMUSP00000033056,ENSMUSP00000053092,ENSMUSP00000057815,ENSMUSP00000069505,ENSMUSP00000073913,ENSMUSP00000132435	Ankrd1,Ccl2,Cd300lb,Gbp2,Nr1d1,Nr1h4,Pycard,Zfp36
GO:1904582	positive regulation of intracellular mRNA localization	2	2	0.0139	ENSMUSP00000021552,ENSMUSP00000057815	Zfp36,Zfp36l1
GO:0051222	positive regulation of protein transport	14	410	0.014	ENSMUSP00000000193,ENSMUSP00000007248,ENSMUSP00000025718,ENSMUSP00000029623,ENSMUSP00000033056,ENSMUSP00000035065,ENSMUSP00000048736,ENSMUSP00000053092,ENSMUSP00000066488,ENSMUSP00000076130,ENSMUSP00000090089,ENSMUSP00000093270,ENSMUSP00000099423,ENSMUSP00000105693	Agt,Akap5,Ank3,Ankrd1,Ccl2,Ccr7,Gpr68,Hspa1l,Nr1h4,Plk3,Ptger4,Ptgs2,Pycard,Tlr2
GO:0002579	positive regulation of antigen processing and presentation	3	13	0.0141	ENSMUSP00000025197,ENSMUSP00000033056,ENSMUSP00000099423	Ccr7,Pycard,Tap2
GO:0002685	regulation of leukocyte migration	9	191	0.0141	ENSMUSP00000000193,ENSMUSP00000017881,ENSMUSP00000029623,ENSMUSP00000031327,ENSMUSP00000033056,ENSMUSP00000034472,ENSMUSP00000048736,ENSMUSP00000099423,ENSMUSP00000099462	Ccl2,Ccr7,Cxcl1,Jam3,Mmp9,Ptger4,Pycard,Tlr2,Tnfrsf18
GO:0007517	muscle organ development	11	274	0.0141	ENSMUSP00000020692,ENSMUSP00000021674,ENSMUSP00000023779,ENSMUSP00000025718,ENSMUSP00000026999,ENSMUSP00000038405,ENSMUSP00000041053,ENSMUSP00000048148,ENSMUSP00000067066,ENSMUSP00000069616,ENSMUSP00000093442	Ankrd1,Btg2,Cited2,Egr1,Egr2,Etv1,Fos,Lif,Nr4a1,Smad7,Stac3
GO:0031098	stress-activated protein kinase signaling cascade	7	117	0.0141	ENSMUSP00000021552,ENSMUSP00000048736,ENSMUSP00000057815,ENSMUSP00000066488,ENSMUSP00000068834,ENSMUSP00000099423,ENSMUSP00000100045	Agt,Akr1b3,Ccr7,Ptger4,Trib1,Zfp36,Zfp36l1
GO:0071241	cellular response to inorganic substance	9	191	0.0141	ENSMUSP00000017881,ENSMUSP00000021635,ENSMUSP00000021674,ENSMUSP00000025691,ENSMUSP00000029270,ENSMUSP00000035065,ENSMUSP00000064680,ENSMUSP00000090089,ENSMUSP00000102711	Akr1c18,Ank3,Ccna2,Fas,Fos,Jun,Junb,Mmp9,Ptgs2
GO:0014910	regulation of smooth muscle cell migration	6	85	0.0143	ENSMUSP00000022368,ENSMUSP00000023610,ENSMUSP00000048736,ENSMUSP00000066488,ENSMUSP00000068834,ENSMUSP00000069616	Adamts1,Agt,Egr1,Plau,Ptger4,Trib1
GO:0002682	regulation of immune system process	28	1165	0.0146	ENSMUSP00000000193,ENSMUSP00000017881,ENSMUSP00000021552,ENSMUSP00000021674,ENSMUSP00000025197,ENSMUSP00000025691,ENSMUSP00000026999,ENSMUSP00000029574,ENSMUSP00000029623,ENSMUSP00000031327,ENSMUSP00000033056,ENSMUSP00000034472,ENSMUSP00000037042,ENSMUSP00000048736,ENSMUSP00000053092,ENSMUSP00000057815,ENSMUSP00000067066,ENSMUSP00000068834,ENSMUSP00000069505,ENSMUSP00000073913,ENSMUSP00000076189,…	C1s1,Ccl2,Ccr7,Cd300lb,Cxcl1,Egr3,Fas,Fos,Gpr68,Inpp5d,Jam3,Jun,Lif,Mmp9,Nfkbiz,Nr1d1,Nr1h4,Ptger4,Pycard,Smad7,Tap2,Tlr2,Tnfrsf18,Trib1,Trim30a,Vcam1,Zfp36,Zfp36l1
GO:0034405	response to fluid shear stress	4	32	0.0148	ENSMUSP00000026999,ENSMUSP00000035065,ENSMUSP00000038405,ENSMUSP00000064823	Cited2,Klf2,Ptgs2,Smad7
GO:0045937	positive regulation of phosphate metabolic process	26	1051	0.0148	ENSMUSP00000000193,ENSMUSP00000017881,ENSMUSP00000020171,ENSMUSP00000022709,ENSMUSP00000025363,ENSMUSP00000025691,ENSMUSP00000026672,ENSMUSP00000029623,ENSMUSP00000031325,ENSMUSP00000033056,ENSMUSP00000035065,ENSMUSP00000035120,ENSMUSP00000036203,ENSMUSP00000047518,ENSMUSP00000048736,ENSMUSP00000049488,ENSMUSP00000053092,ENSMUSP00000066488,ENSMUSP00000067066,ENSMUSP00000069616,ENSMUSP00000087098,…	Adra2a,Agt,Akap5,Areg,Cck,Ccl2,Ccr7,Ctgf,Eda2r,Egr1,Fas,Hbegf,Jun,Lif,Mapk15,Mmp9,Nr1h4,Pde8a,Ppp1r15a,Ptger4,Ptgs2,Pycard,Ramp3,Spry2,Tlr2,Tnfrsf18
GO:1904707	positive regulation of vascular smooth muscle cell proliferation	4	32	0.0148	ENSMUSP00000017881,ENSMUSP00000023610,ENSMUSP00000066488,ENSMUSP00000102711	Adamts1,Agt,Jun,Mmp9
GO:0043066	negative regulation of apoptotic process	23	884	0.015	ENSMUSP00000003635,ENSMUSP00000017881,ENSMUSP00000020692,ENSMUSP00000022212,ENSMUSP00000022709,ENSMUSP00000023750,ENSMUSP00000023779,ENSMUSP00000025025,ENSMUSP00000025691,ENSMUSP00000035065,ENSMUSP00000037042,ENSMUSP00000038405,ENSMUSP00000053092,ENSMUSP00000066488,ENSMUSP00000076130,ENSMUSP00000082154,ENSMUSP00000096248,ENSMUSP00000099423,ENSMUSP00000099462,ENSMUSP00000099889,ENSMUSP00000100045,…	Agt,Akr1b3,Arnt2,Btg2,Ccr7,Cited2,Dusp1,Egr3,Faim2,Fas,Ier3,Ifit3,Jun,Mmp9,Nr1h4,Nr4a1,Pias1,Plk2,Plk3,Ptgs2,Sgk1,Spry2,Tnfrsf18
GO:0042542	response to hydrogen peroxide	7	120	0.0155	ENSMUSP00000025025,ENSMUSP00000025850,ENSMUSP00000031325,ENSMUSP00000064823,ENSMUSP00000067013,ENSMUSP00000100045,ENSMUSP00000102711	Akr1b3,Areg,Dusp1,Fosl1,Jun,Klf2,Rhob
GO:0006883	cellular sodium ion homeostasis	3	14	0.0163	ENSMUSP00000066488,ENSMUSP00000105538,ENSMUSP00000114074	Agt,Nr3c2,Sgk1
GO:0097201	negative regulation of transcription from RNA polymerase II promoter in response to stress	3	14	0.0163	ENSMUSP00000038405,ENSMUSP00000049488,ENSMUSP00000102711	Cited2,Jun,Ppp1r15a
GO:0060548	negative regulation of cell death	25	1004	0.0164	ENSMUSP00000003635,ENSMUSP00000017881,ENSMUSP00000020171,ENSMUSP00000020692,ENSMUSP00000022212,ENSMUSP00000022709,ENSMUSP00000023750,ENSMUSP00000023779,ENSMUSP00000025025,ENSMUSP00000025691,ENSMUSP00000026672,ENSMUSP00000035065,ENSMUSP00000037042,ENSMUSP00000038405,ENSMUSP00000053092,ENSMUSP00000066488,ENSMUSP00000076130,ENSMUSP00000082154,ENSMUSP00000096248,ENSMUSP00000099423,ENSMUSP00000099462,…	Agt,Akr1b3,Arnt2,Btg2,Ccr7,Cited2,Ctgf,Dusp1,Egr3,Faim2,Fas,Ier3,Ifit3,Jun,Mmp9,Nr1h4,Nr4a1,Pde8a,Pias1,Plk2,Plk3,Ptgs2,Sgk1,Spry2,Tnfrsf18
GO:1905475	regulation of protein localization to membrane	8	158	0.0164	ENSMUSP00000000193,ENSMUSP00000006614,ENSMUSP00000047518,ENSMUSP00000048148,ENSMUSP00000090089,ENSMUSP00000093270,ENSMUSP00000099073,ENSMUSP00000104932	Akap5,Ank3,Ccl2,Epha2,Ptn,Ramp3,Shank3,Stac3
GO:0031668	cellular response to extracellular stimulus	10	239	0.0167	ENSMUSP00000000193,ENSMUSP00000017881,ENSMUSP00000021674,ENSMUSP00000025691,ENSMUSP00000025850,ENSMUSP00000035065,ENSMUSP00000053092,ENSMUSP00000099073,ENSMUSP00000102711,ENSMUSP00000125729	Ccl2,Fas,Fos,Fosl1,Jun,Mmp9,Nr1h4,Ptgs2,Ptn,Usf1
GO:0061061	muscle structure development	15	470	0.0168	ENSMUSP00000020692,ENSMUSP00000021674,ENSMUSP00000022327,ENSMUSP00000023779,ENSMUSP00000025718,ENSMUSP00000026999,ENSMUSP00000038405,ENSMUSP00000041053,ENSMUSP00000048148,ENSMUSP00000066488,ENSMUSP00000067066,ENSMUSP00000069616,ENSMUSP00000093141,ENSMUSP00000093442,ENSMUSP00000140890	Adm,Agt,Ankrd1,Btg2,Cited2,Egr1,Egr2,Etv1,Fos,Ldb3,Lif,Nr4a1,Smad7,Stac3,Wfikkn1
GO:1902532	negative regulation of intracellular signal transduction	16	521	0.0171	ENSMUSP00000006614,ENSMUSP00000017881,ENSMUSP00000020118,ENSMUSP00000021271,ENSMUSP00000022709,ENSMUSP00000025025,ENSMUSP00000025295,ENSMUSP00000033056,ENSMUSP00000035065,ENSMUSP00000047844,ENSMUSP00000049292,ENSMUSP00000053092,ENSMUSP00000057563,ENSMUSP00000067066,ENSMUSP00000102718,ENSMUSP00000109010	Chad,Dusp1,Dusp6,Epha2,Flrt1,Gp1ba,Lif,Lrrc19,Mmp9,Nr1h4,Per1,Ptgs2,Pycard,Spry1,Spry2,Spry4
GO:0032731	positive regulation of interleukin-1 beta production	4	34	0.0173	ENSMUSP00000029623,ENSMUSP00000033056,ENSMUSP00000069616,ENSMUSP00000099423	Ccr7,Egr1,Pycard,Tlr2
GO:0045637	regulation of myeloid cell differentiation	9	199	0.0173	ENSMUSP00000021552,ENSMUSP00000021674,ENSMUSP00000025691,ENSMUSP00000057815,ENSMUSP00000067066,ENSMUSP00000068834,ENSMUSP00000102711,ENSMUSP00000105693,ENSMUSP00000127941	Fas,Fos,Gpr68,Inpp5d,Jun,Lif,Trib1,Zfp36,Zfp36l1
GO:0003014	renal system process	6	90	0.0177	ENSMUSP00000025691,ENSMUSP00000048736,ENSMUSP00000066488,ENSMUSP00000099521,ENSMUSP00000100045,ENSMUSP00000140890	Adm,Agt,Akr1b3,Fas,Nppb,Ptger4
GO:0014911	positive regulation of smooth muscle cell migration	5	60	0.0179	ENSMUSP00000022368,ENSMUSP00000023610,ENSMUSP00000048736,ENSMUSP00000066488,ENSMUSP00000069616	Adamts1,Agt,Egr1,Plau,Ptger4
GO:0002761	regulation of myeloid leukocyte differentiation	7	125	0.0185	ENSMUSP00000021552,ENSMUSP00000021674,ENSMUSP00000067066,ENSMUSP00000068834,ENSMUSP00000102711,ENSMUSP00000105693,ENSMUSP00000127941	Fos,Gpr68,Inpp5d,Jun,Lif,Trib1,Zfp36l1
GO:0035815	positive regulation of renal sodium excretion	3	15	0.0185	ENSMUSP00000048736,ENSMUSP00000066488,ENSMUSP00000099521	Agt,Nppb,Ptger4
GO:0060712	spongiotrophoblast layer development	3	15	0.0185	ENSMUSP00000021552,ENSMUSP00000067066,ENSMUSP00000140890	Adm,Lif,Zfp36l1
GO:0032570	response to progesterone	4	35	0.0186	ENSMUSP00000000193,ENSMUSP00000021674,ENSMUSP00000025850,ENSMUSP00000099073	Ccl2,Fos,Fosl1,Ptn
GO:2000027	regulation of animal organ morphogenesis	9	203	0.0191	ENSMUSP00000016172,ENSMUSP00000022368,ENSMUSP00000038405,ENSMUSP00000047844,ENSMUSP00000049292,ENSMUSP00000066488,ENSMUSP00000067066,ENSMUSP00000099073,ENSMUSP00000112776	Agt,Celsr1,Chad,Cited2,Lif,Plau,Ptn,Robo2,Spry1
GO:0051247	positive regulation of protein metabolic process	34	1556	0.0194	ENSMUSP00000000193,ENSMUSP00000003635,ENSMUSP00000017881,ENSMUSP00000020171,ENSMUSP00000022212,ENSMUSP00000022709,ENSMUSP00000025363,ENSMUSP00000025691,ENSMUSP00000026672,ENSMUSP00000026999,ENSMUSP00000029623,ENSMUSP00000031325,ENSMUSP00000033056,ENSMUSP00000035065,ENSMUSP00000035120,ENSMUSP00000036203,ENSMUSP00000047518,ENSMUSP00000048736,ENSMUSP00000049488,ENSMUSP00000064823,ENSMUSP00000066488,…	Acrbp,Adra2a,Agt,Akap5,Areg,Cck,Ccl2,Ccr7,Ctgf,Eda2r,Egr1,Fas,Hbegf,Ier3,Jun,Klf2,Lif,Mapk15,Mmp9,Pde8a,Pias1,Plk2,Plk3,Ppp1r15a,Ptger4,Ptgs2,Pycard,Ramp3,Smad7,Spry2,Tlr2,Tnfrsf18,Trib1,Trim30a
GO:0071248	cellular response to metal ion	8	164	0.0195	ENSMUSP00000017881,ENSMUSP00000021635,ENSMUSP00000021674,ENSMUSP00000025691,ENSMUSP00000035065,ENSMUSP00000064680,ENSMUSP00000090089,ENSMUSP00000102711	Akr1c18,Ank3,Fas,Fos,Jun,Junb,Mmp9,Ptgs2
GO:0045785	positive regulation of cell adhesion	13	383	0.0198	ENSMUSP00000000193,ENSMUSP00000026999,ENSMUSP00000029574,ENSMUSP00000033056,ENSMUSP00000037042,ENSMUSP00000038405,ENSMUSP00000048736,ENSMUSP00000073099,ENSMUSP00000090089,ENSMUSP00000099073,ENSMUSP00000099423,ENSMUSP00000099462,ENSMUSP00000110102	Ank3,Ccl2,Ccr7,Cited2,Egr3,Epha1,Nfkbiz,Ptger4,Ptn,Pycard,Smad7,Tnfrsf18,Vcam1
GO:0002585	positive regulation of antigen processing and presentation of peptide antigen	2	3	0.0201	ENSMUSP00000025197,ENSMUSP00000033056	Pycard,Tap2
GO:0050704	regulation of interleukin-1 secretion	4	36	0.0201	ENSMUSP00000029623,ENSMUSP00000033056,ENSMUSP00000048736,ENSMUSP00000099423	Ccr7,Ptger4,Pycard,Tlr2
GO:0061564	axon development	12	337	0.0201	ENSMUSP00000004389,ENSMUSP00000034472,ENSMUSP00000035120,ENSMUSP00000041053,ENSMUSP00000054938,ENSMUSP00000078336,ENSMUSP00000090089,ENSMUSP00000093442,ENSMUSP00000096775,ENSMUSP00000102711,ENSMUSP00000105053,ENSMUSP00000112776	Ablim1,Ank3,Arhgef28,Cck,Egr2,Etv1,Grcc10,Jam3,Jun,Kif5a,Robo2,Tnfrsf26
GO:0009314	response to radiation	14	433	0.0202	ENSMUSP00000000193,ENSMUSP00000021271,ENSMUSP00000021674,ENSMUSP00000025025,ENSMUSP00000035065,ENSMUSP00000064680,ENSMUSP00000067013,ENSMUSP00000069616,ENSMUSP00000076130,ENSMUSP00000096248,ENSMUSP00000099073,ENSMUSP00000102711,ENSMUSP00000114074,ENSMUSP00000125729	Ccl2,Dusp1,Egr1,Fos,Jun,Junb,Per1,Pias1,Plk3,Ptgs2,Ptn,Rhob,Sgk1,Usf1
GO:0009896	positive regulation of catabolic process	13	388	0.0217	ENSMUSP00000003635,ENSMUSP00000020692,ENSMUSP00000021552,ENSMUSP00000022212,ENSMUSP00000026999,ENSMUSP00000029623,ENSMUSP00000036203,ENSMUSP00000057815,ENSMUSP00000068834,ENSMUSP00000076130,ENSMUSP00000076189,ENSMUSP00000087098,ENSMUSP00000096248	Adra2a,Btg2,Ier3,Mapk15,Pias1,Plk2,Plk3,Smad7,Tlr2,Trib1,Trim30a,Zfp36,Zfp36l1
GO:0045732	positive regulation of protein catabolic process	9	208	0.0217	ENSMUSP00000003635,ENSMUSP00000022212,ENSMUSP00000026999,ENSMUSP00000036203,ENSMUSP00000068834,ENSMUSP00000076130,ENSMUSP00000076189,ENSMUSP00000087098,ENSMUSP00000096248	Adra2a,Ier3,Mapk15,Pias1,Plk2,Plk3,Smad7,Trib1,Trim30a
GO:0071384	cellular response to corticosteroid stimulus	5	64	0.0221	ENSMUSP00000000193,ENSMUSP00000021552,ENSMUSP00000021635,ENSMUSP00000057815,ENSMUSP00000114074	Akr1c18,Ccl2,Sgk1,Zfp36,Zfp36l1
GO:0032989	cellular component morphogenesis	20	752	0.0222	ENSMUSP00000004389,ENSMUSP00000006614,ENSMUSP00000022327,ENSMUSP00000029623,ENSMUSP00000035120,ENSMUSP00000041053,ENSMUSP00000054938,ENSMUSP00000057563,ENSMUSP00000064823,ENSMUSP00000073099,ENSMUSP00000078336,ENSMUSP00000090089,ENSMUSP00000093442,ENSMUSP00000096775,ENSMUSP00000102745,ENSMUSP00000104932,ENSMUSP00000105053,ENSMUSP00000109010,ENSMUSP00000112776,ENSMUSP00000114074	Ablim1,Ank3,Arhgef28,Cck,Egr2,Epha1,Epha2,Etv1,Flrt1,Gp1ba,Grcc10,Kif5a,Klf2,Ldb3,Myo7a,Robo2,Sgk1,Shank3,Tlr2,Tnfrsf26
GO:0044087	regulation of cellular component biogenesis	22	863	0.0222	ENSMUSP00000006614,ENSMUSP00000020171,ENSMUSP00000021458,ENSMUSP00000022212,ENSMUSP00000025691,ENSMUSP00000025850,ENSMUSP00000029623,ENSMUSP00000033056,ENSMUSP00000035120,ENSMUSP00000039950,ENSMUSP00000048736,ENSMUSP00000066488,ENSMUSP00000073099,ENSMUSP00000076189,ENSMUSP00000082137,ENSMUSP00000087098,ENSMUSP00000099423,ENSMUSP00000102711,ENSMUSP00000104932,ENSMUSP00000109010,ENSMUSP00000114074,…	Agt,Amigo3,Camsap3,Cck,Ccr7,Ctgf,Epha1,Epha2,Fas,Flrt1,Fosl1,Jun,Mapk15,Plk2,Pmepa1,Ptger4,Pycard,Sgk1,Shank3,Sptb,Tlr2,Trim30a
GO:0006915	apoptotic process	21	809	0.0226	ENSMUSP00000003635,ENSMUSP00000006614,ENSMUSP00000017751,ENSMUSP00000021552,ENSMUSP00000023750,ENSMUSP00000023779,ENSMUSP00000025691,ENSMUSP00000033056,ENSMUSP00000035101,ENSMUSP00000035120,ENSMUSP00000049488,ENSMUSP00000054938,ENSMUSP00000067013,ENSMUSP00000076130,ENSMUSP00000091226,ENSMUSP00000099462,ENSMUSP00000102711,ENSMUSP00000109463,ENSMUSP00000114074,ENSMUSP00000127941,ENSMUSP00000132815	Cck,Csrnp1,Eda2r,Epha2,Faim2,Fas,Ier3,Inpp5d,Jun,Nr4a1,Phlda1,Plk3,Ppp1r15a,Pycard,Rhob,Sgk1,Sp110,Tnfrsf18,Tnfrsf26,Tns4,Zfp36l1
GO:1903829	positive regulation of cellular protein localization	11	297	0.0226	ENSMUSP00000000193,ENSMUSP00000006614,ENSMUSP00000007248,ENSMUSP00000035065,ENSMUSP00000047518,ENSMUSP00000048148,ENSMUSP00000067066,ENSMUSP00000076130,ENSMUSP00000090089,ENSMUSP00000093270,ENSMUSP00000099073	Akap5,Ank3,Ccl2,Epha2,Hspa1l,Lif,Plk3,Ptgs2,Ptn,Ramp3,Stac3
GO:0000165	MAPK cascade	8	170	0.0231	ENSMUSP00000021552,ENSMUSP00000048736,ENSMUSP00000057815,ENSMUSP00000066488,ENSMUSP00000068834,ENSMUSP00000087098,ENSMUSP00000099423,ENSMUSP00000104932	Agt,Ccr7,Mapk15,Ptger4,Shank3,Trib1,Zfp36,Zfp36l1
GO:0007422	peripheral nervous system development	5	65	0.0231	ENSMUSP00000037042,ENSMUSP00000038405,ENSMUSP00000041053,ENSMUSP00000066488,ENSMUSP00000093442	Agt,Cited2,Egr2,Egr3,Etv1
GO:0010632	regulation of epithelial cell migration	9	212	0.0237	ENSMUSP00000006614,ENSMUSP00000017881,ENSMUSP00000022212,ENSMUSP00000025363,ENSMUSP00000035065,ENSMUSP00000066399,ENSMUSP00000066488,ENSMUSP00000067013,ENSMUSP00000102711	Agt,Epha2,Hbegf,Jun,Mmp9,Plk2,Ptgs2,Rhob,Sp100
GO:0090087	regulation of peptide transport	19	703	0.0237	ENSMUSP00000000193,ENSMUSP00000007248,ENSMUSP00000025718,ENSMUSP00000029623,ENSMUSP00000033056,ENSMUSP00000035065,ENSMUSP00000036203,ENSMUSP00000048736,ENSMUSP00000053092,ENSMUSP00000066399,ENSMUSP00000066488,ENSMUSP00000066620,ENSMUSP00000067066,ENSMUSP00000069505,ENSMUSP00000076130,ENSMUSP00000090089,ENSMUSP00000093270,ENSMUSP00000099423,ENSMUSP00000105693	Adra2a,Agt,Akap5,Ank3,Ankrd1,Ccl2,Ccr7,Gpr68,Hspa1l,Lif,Nr1d1,Nr1h4,Per2,Plk3,Ptger4,Ptgs2,Pycard,Sp100,Tlr2
GO:1900153	positive regulation of nuclear-transcribed mRNA catabolic process, deadenylation-dependent decay	3	17	0.0237	ENSMUSP00000020692,ENSMUSP00000021552,ENSMUSP00000057815	Btg2,Zfp36,Zfp36l1
GO:0042035	regulation of cytokine biosynthetic process	6	98	0.0243	ENSMUSP00000029623,ENSMUSP00000047968,ENSMUSP00000057815,ENSMUSP00000069616,ENSMUSP00000105861,ENSMUSP00000127941	Adam33,Egr1,Inpp5d,S100b,Tlr2,Zfp36
GO:0044057	regulation of system process	16	546	0.0243	ENSMUSP00000004389,ENSMUSP00000020171,ENSMUSP00000025363,ENSMUSP00000026999,ENSMUSP00000035065,ENSMUSP00000035120,ENSMUSP00000036203,ENSMUSP00000047968,ENSMUSP00000048736,ENSMUSP00000066488,ENSMUSP00000066620,ENSMUSP00000067066,ENSMUSP00000096357,ENSMUSP00000099521,ENSMUSP00000104932,ENSMUSP00000140890	Adm,Adra2a,Agt,Cck,Ctgf,Grcc10,Hbegf,Kcnd3,Lif,Nppb,Per2,Ptger4,Ptgs2,S100b,Shank3,Smad7
GO:0000902	cell morphogenesis	18	652	0.0244	ENSMUSP00000004389,ENSMUSP00000006614,ENSMUSP00000035120,ENSMUSP00000041053,ENSMUSP00000054938,ENSMUSP00000057563,ENSMUSP00000064823,ENSMUSP00000073099,ENSMUSP00000078336,ENSMUSP00000090089,ENSMUSP00000093442,ENSMUSP00000096775,ENSMUSP00000102745,ENSMUSP00000104932,ENSMUSP00000105053,ENSMUSP00000109010,ENSMUSP00000112776,ENSMUSP00000114074	Ablim1,Ank3,Arhgef28,Cck,Egr2,Epha1,Epha2,Etv1,Flrt1,Gp1ba,Grcc10,Kif5a,Klf2,Myo7a,Robo2,Sgk1,Shank3,Tnfrsf26
GO:0034599	cellular response to oxidative stress	9	214	0.0249	ENSMUSP00000017881,ENSMUSP00000021635,ENSMUSP00000021674,ENSMUSP00000029270,ENSMUSP00000064823,ENSMUSP00000067013,ENSMUSP00000100045,ENSMUSP00000102711,ENSMUSP00000125502	Akr1b3,Akr1c18,Ccna2,Fos,Jun,Klf2,Mmp9,Rad52,Rhob
GO:0008306	associative learning	6	99	0.0252	ENSMUSP00000020692,ENSMUSP00000021674,ENSMUSP00000046787,ENSMUSP00000066488,ENSMUSP00000096248,ENSMUSP00000114074	Agt,Btg2,Fos,Pias1,Sgk1,Tbr1
GO:0033135	regulation of peptidyl-serine phosphorylation	7	135	0.0253	ENSMUSP00000022709,ENSMUSP00000026999,ENSMUSP00000035065,ENSMUSP00000047518,ENSMUSP00000049488,ENSMUSP00000066488,ENSMUSP00000067066	Agt,Lif,Ppp1r15a,Ptgs2,Ramp3,Smad7,Spry2
GO:0043269	regulation of ion transport	18	655	0.0253	ENSMUSP00000017881,ENSMUSP00000021271,ENSMUSP00000031327,ENSMUSP00000035065,ENSMUSP00000035120,ENSMUSP00000042410,ENSMUSP00000047518,ENSMUSP00000048148,ENSMUSP00000051278,ENSMUSP00000054086,ENSMUSP00000066488,ENSMUSP00000066620,ENSMUSP00000090089,ENSMUSP00000093270,ENSMUSP00000096357,ENSMUSP00000103539,ENSMUSP00000104932,ENSMUSP00000114074	Agt,Akap5,Ank3,Cck,Cox17,Cxcl1,Kcnc3,Kcnd3,Kcnk7,Mmp9,Per1,Per2,Ptgs2,Ramp3,Sgk1,Shank3,Slc30a1,Stac3
GO:0043407	negative regulation of MAP kinase activity	5	67	0.0253	ENSMUSP00000020118,ENSMUSP00000022709,ENSMUSP00000025025,ENSMUSP00000025295,ENSMUSP00000049292	Dusp1,Dusp6,Spry1,Spry2,Spry4
GO:0009890	negative regulation of biosynthetic process	31	1408	0.0257	ENSMUSP00000003635,ENSMUSP00000009340,ENSMUSP00000020692,ENSMUSP00000021271,ENSMUSP00000021552,ENSMUSP00000021635,ENSMUSP00000025025,ENSMUSP00000025363,ENSMUSP00000025718,ENSMUSP00000026999,ENSMUSP00000038405,ENSMUSP00000039298,ENSMUSP00000044395,ENSMUSP00000048736,ENSMUSP00000049488,ENSMUSP00000053092,ENSMUSP00000057815,ENSMUSP00000064680,ENSMUSP00000064823,ENSMUSP00000066620,ENSMUSP00000069505,…	Akr1c18,Ankrd1,Btg2,Cited2,Dnmt3l,Dusp1,Egr1,Eif4ebp3,Hbegf,Hist1h1d,Ier3,Inpp5d,Jun,Junb,Klf2,Mapk15,Mnda,Nr1d1,Nr1d2,Nr1h4,Nr6a1,Per1,Per2,Per3,Pias1,Plk3,Ppp1r15a,Ptger4,Smad7,Zfp36,Zfp36l1
GO:0051049	regulation of transport	37	1782	0.0261	ENSMUSP00000000193,ENSMUSP00000003635,ENSMUSP00000007248,ENSMUSP00000016172,ENSMUSP00000017881,ENSMUSP00000021271,ENSMUSP00000025718,ENSMUSP00000029623,ENSMUSP00000030674,ENSMUSP00000031327,ENSMUSP00000033056,ENSMUSP00000035065,ENSMUSP00000035120,ENSMUSP00000036203,ENSMUSP00000042410,ENSMUSP00000047518,ENSMUSP00000048148,ENSMUSP00000048736,ENSMUSP00000051278,ENSMUSP00000053092,ENSMUSP00000054086,…	Adra2a,Agt,Akap5,Ank3,Ankrd1,Cck,Ccl2,Ccr7,Celsr1,Cox17,Cxcl1,Gpr68,Hspa1l,Ier3,Kcnc3,Kcnd3,Kcnk7,Lif,Mapk15,Mmp9,Nppb,Nr1d1,Nr1h4,Per1,Per2,Plk3,Ptger4,Ptgs2,Pycard,Ramp3,Sgk1,Shank3,Slc30a1,Sp100,Stac3,Sytl1,Tlr2
GO:0060326	cell chemotaxis	8	175	0.0262	ENSMUSP00000000193,ENSMUSP00000006614,ENSMUSP00000023779,ENSMUSP00000025363,ENSMUSP00000029574,ENSMUSP00000031327,ENSMUSP00000037042,ENSMUSP00000099423	Ccl2,Ccr7,Cxcl1,Egr3,Epha2,Hbegf,Nr4a1,Vcam1
GO:0008219	cell death	22	883	0.0272	ENSMUSP00000003635,ENSMUSP00000006614,ENSMUSP00000017751,ENSMUSP00000021552,ENSMUSP00000022368,ENSMUSP00000023750,ENSMUSP00000023779,ENSMUSP00000025691,ENSMUSP00000033056,ENSMUSP00000035101,ENSMUSP00000035120,ENSMUSP00000049488,ENSMUSP00000054938,ENSMUSP00000067013,ENSMUSP00000076130,ENSMUSP00000091226,ENSMUSP00000099462,ENSMUSP00000102711,ENSMUSP00000109463,ENSMUSP00000114074,ENSMUSP00000127941,…	Cck,Csrnp1,Eda2r,Epha2,Faim2,Fas,Ier3,Inpp5d,Jun,Nr4a1,Phlda1,Plau,Plk3,Ppp1r15a,Pycard,Rhob,Sgk1,Sp110,Tnfrsf18,Tnfrsf26,Tns4,Zfp36l1
GO:0051223	regulation of protein transport	18	661	0.0272	ENSMUSP00000000193,ENSMUSP00000007248,ENSMUSP00000025718,ENSMUSP00000029623,ENSMUSP00000033056,ENSMUSP00000035065,ENSMUSP00000036203,ENSMUSP00000048736,ENSMUSP00000053092,ENSMUSP00000066399,ENSMUSP00000066488,ENSMUSP00000066620,ENSMUSP00000069505,ENSMUSP00000076130,ENSMUSP00000090089,ENSMUSP00000093270,ENSMUSP00000099423,ENSMUSP00000105693	Adra2a,Agt,Akap5,Ank3,Ankrd1,Ccl2,Ccr7,Gpr68,Hspa1l,Nr1d1,Nr1h4,Per2,Plk3,Ptger4,Ptgs2,Pycard,Sp100,Tlr2
GO:0097167	circadian regulation of translation	2	4	0.0272	ENSMUSP00000021271,ENSMUSP00000066620	Per1,Per2
GO:1990410	adrenomedullin receptor signaling pathway	2	4	0.0272	ENSMUSP00000047518,ENSMUSP00000140890	Adm,Ramp3
GO:0010634	positive regulation of epithelial cell migration	7	138	0.0276	ENSMUSP00000017881,ENSMUSP00000022212,ENSMUSP00000025363,ENSMUSP00000035065,ENSMUSP00000066488,ENSMUSP00000067013,ENSMUSP00000102711	Agt,Hbegf,Jun,Mmp9,Plk2,Ptgs2,Rhob
GO:0046427	positive regulation of receptor signaling pathway via JAK-STAT	5	69	0.0276	ENSMUSP00000048736,ENSMUSP00000066488,ENSMUSP00000067066,ENSMUSP00000099462,ENSMUSP00000100045	Agt,Akr1b3,Lif,Ptger4,Tnfrsf18
GO:0010647	positive regulation of cell communication	34	1608	0.029	ENSMUSP00000000193,ENSMUSP00000017881,ENSMUSP00000020171,ENSMUSP00000021635,ENSMUSP00000022212,ENSMUSP00000022709,ENSMUSP00000025363,ENSMUSP00000025691,ENSMUSP00000025718,ENSMUSP00000026672,ENSMUSP00000029623,ENSMUSP00000033056,ENSMUSP00000035065,ENSMUSP00000036203,ENSMUSP00000038405,ENSMUSP00000047518,ENSMUSP00000047968,ENSMUSP00000048736,ENSMUSP00000052085,ENSMUSP00000053092,ENSMUSP00000057844,…	Adra2a,Agt,Akap5,Akr1b3,Akr1c18,Ank3,Ankrd1,Blnk,Ccl2,Ccr7,Cited2,Ctgf,Daam2,Eda2r,Fas,Gpr68,Hbegf,Jun,Lif,Mmp9,Nr1h4,Pde8a,Plk2,Ptger4,Ptgs2,Ptn,Pycard,Ramp3,Robo2,S100b,Shank3,Spry2,Tlr2,Tnfrsf18
GO:0033138	positive regulation of peptidyl-serine phosphorylation	6	103	0.0291	ENSMUSP00000022709,ENSMUSP00000035065,ENSMUSP00000047518,ENSMUSP00000049488,ENSMUSP00000066488,ENSMUSP00000067066	Agt,Lif,Ppp1r15a,Ptgs2,Ramp3,Spry2
GO:0042698	ovulation cycle	5	70	0.0291	ENSMUSP00000023610,ENSMUSP00000060893,ENSMUSP00000066488,ENSMUSP00000069616,ENSMUSP00000099073	Adamts1,Agt,Egr1,Gpr149,Ptn
GO:0045986	negative regulation of smooth muscle contraction	3	19	0.0291	ENSMUSP00000035065,ENSMUSP00000036203,ENSMUSP00000048736	Adra2a,Ptger4,Ptgs2
GO:0060602	branch elongation of an epithelium	3	19	0.0291	ENSMUSP00000022709,ENSMUSP00000031325,ENSMUSP00000049292	Areg,Spry1,Spry2
GO:0007613	memory	7	140	0.0293	ENSMUSP00000022212,ENSMUSP00000035065,ENSMUSP00000047968,ENSMUSP00000049380,ENSMUSP00000069616,ENSMUSP00000104932,ENSMUSP00000114074	Egr1,Gpr110,Plk2,Ptgs2,S100b,Sgk1,Shank3
GO:2000112	regulation of cellular macromolecule biosynthetic process	60	3324	0.0296	ENSMUSP00000000080,ENSMUSP00000009340,ENSMUSP00000020298,ENSMUSP00000020692,ENSMUSP00000021271,ENSMUSP00000021552,ENSMUSP00000021674,ENSMUSP00000023024,ENSMUSP00000023779,ENSMUSP00000025025,ENSMUSP00000025363,ENSMUSP00000025718,ENSMUSP00000025850,ENSMUSP00000026999,ENSMUSP00000029270,ENSMUSP00000029623,ENSMUSP00000032107,ENSMUSP00000033056,ENSMUSP00000035101,ENSMUSP00000037042,ENSMUSP00000038405,…	Ablim1,Agt,Ankrd1,Arnt2,Btg2,Ccna2,Ccr7,Cited2,Creb5,Csrnp1,Dbp,Dnmt3l,Dusp1,Eda2r,Egr1,Egr2,Egr3,Eif4ebp3,Etv1,Fos,Fosl1,Gpr110,Hbegf,Hist1h1d,Ier2,Jun,Junb,Kbtbd8,Klf2,Klf6,Lif,Mapk15,Mnda,Nfkbiz,Nr1d1,Nr1d2,Nr1h4,Nr3c2,Nr4a1,Nr6a1,Pcbd1,Per1,Per2,Per3,Pias1,Plk3,Ppp1r15a,Pycard,Smad7,Sp100,Sp110,Tbr1,Tef,Tlr2,Trib1,Trim30a,Usf1,Zfp322a,Zfp36,Zfp36l1
GO:2000241	regulation of reproductive process	8	180	0.0296	ENSMUSP00000022368,ENSMUSP00000025025,ENSMUSP00000038405,ENSMUSP00000048736,ENSMUSP00000060893,ENSMUSP00000067066,ENSMUSP00000087098,ENSMUSP00000098928	Cited2,Dusp1,Gpr149,Lif,Mapk15,Plau,Plb1,Ptger4
GO:0045944	positive regulation of transcription by RNA polymerase II	26	1125	0.0297	ENSMUSP00000000080,ENSMUSP00000021271,ENSMUSP00000021674,ENSMUSP00000023024,ENSMUSP00000023779,ENSMUSP00000025850,ENSMUSP00000029623,ENSMUSP00000035101,ENSMUSP00000037042,ENSMUSP00000038405,ENSMUSP00000038532,ENSMUSP00000041053,ENSMUSP00000046787,ENSMUSP00000053092,ENSMUSP00000060275,ENSMUSP00000064680,ENSMUSP00000064823,ENSMUSP00000067066,ENSMUSP00000069616,ENSMUSP00000078336,ENSMUSP00000079693,…	Ablim1,Arnt2,Cited2,Creb5,Csrnp1,Dbp,Egr1,Egr2,Egr3,Etv1,Fos,Fosl1,Ier2,Jun,Junb,Klf2,Klf6,Lif,Nr1h4,Nr4a1,Nr6a1,Per1,Tbr1,Tef,Tlr2,Usf1
GO:0043254	regulation of protein complex assembly	13	409	0.0299	ENSMUSP00000021458,ENSMUSP00000025691,ENSMUSP00000025850,ENSMUSP00000029623,ENSMUSP00000033056,ENSMUSP00000035120,ENSMUSP00000039950,ENSMUSP00000048736,ENSMUSP00000076189,ENSMUSP00000087098,ENSMUSP00000102711,ENSMUSP00000114074,ENSMUSP00000125993	Camsap3,Cck,Fas,Fosl1,Jun,Mapk15,Pmepa1,Ptger4,Pycard,Sgk1,Sptb,Tlr2,Trim30a
GO:0048589	developmental growth	13	409	0.0299	ENSMUSP00000021552,ENSMUSP00000022368,ENSMUSP00000022709,ENSMUSP00000025363,ENSMUSP00000028160,ENSMUSP00000031325,ENSMUSP00000037246,ENSMUSP00000049292,ENSMUSP00000060893,ENSMUSP00000064823,ENSMUSP00000066488,ENSMUSP00000109010,ENSMUSP00000140890	Adm,Agt,Areg,Flrt1,Gpr149,Hbegf,Igsf10,Klf2,Plau,Slc25a25,Spry1,Spry2,Zfp36l1
GO:0042592	homeostatic process	32	1494	0.0312	ENSMUSP00000000193,ENSMUSP00000020171,ENSMUSP00000025691,ENSMUSP00000026999,ENSMUSP00000029574,ENSMUSP00000031327,ENSMUSP00000034472,ENSMUSP00000035120,ENSMUSP00000036203,ENSMUSP00000038405,ENSMUSP00000042410,ENSMUSP00000047393,ENSMUSP00000047518,ENSMUSP00000047968,ENSMUSP00000053092,ENSMUSP00000064823,ENSMUSP00000066399,ENSMUSP00000066488,ENSMUSP00000069505,ENSMUSP00000078160,ENSMUSP00000088031,…	Adm,Adra2a,Agt,Akap5,Akr1b3,Ank3,Bpgm,Cck,Ccl2,Ccr7,Cited2,Ctgf,Cxcl1,Fas,Gcnt4,Jam3,Klf2,Letm2,Muc6,Nr1d1,Nr1d2,Nr1h4,Nr3c2,Ramp3,S100b,Sgk1,Shank3,Slc30a1,Smad7,Sp100,Usf1,Vcam1
GO:0006970	response to osmotic stress	5	72	0.0316	ENSMUSP00000021552,ENSMUSP00000035065,ENSMUSP00000066488,ENSMUSP00000076130,ENSMUSP00000100045	Agt,Akr1b3,Plk3,Ptgs2,Zfp36l1
GO:0045429	positive regulation of nitric oxide biosynthetic process	4	43	0.0316	ENSMUSP00000029623,ENSMUSP00000035065,ENSMUSP00000064823,ENSMUSP00000066488	Agt,Klf2,Ptgs2,Tlr2
GO:1903522	regulation of blood circulation	9	225	0.0316	ENSMUSP00000020171,ENSMUSP00000025363,ENSMUSP00000026999,ENSMUSP00000035065,ENSMUSP00000036203,ENSMUSP00000066488,ENSMUSP00000066620,ENSMUSP00000096357,ENSMUSP00000140890	Adm,Adra2a,Agt,Ctgf,Hbegf,Kcnd3,Per2,Ptgs2,Smad7
GO:1904407	positive regulation of nitric oxide metabolic process	4	43	0.0316	ENSMUSP00000029623,ENSMUSP00000035065,ENSMUSP00000064823,ENSMUSP00000066488	Agt,Klf2,Ptgs2,Tlr2
GO:0031327	negative regulation of cellular biosynthetic process	30	1375	0.0319	ENSMUSP00000003635,ENSMUSP00000009340,ENSMUSP00000020692,ENSMUSP00000021271,ENSMUSP00000021552,ENSMUSP00000021635,ENSMUSP00000025025,ENSMUSP00000025363,ENSMUSP00000025718,ENSMUSP00000026999,ENSMUSP00000038405,ENSMUSP00000039298,ENSMUSP00000044395,ENSMUSP00000049488,ENSMUSP00000053092,ENSMUSP00000057815,ENSMUSP00000064680,ENSMUSP00000064823,ENSMUSP00000066620,ENSMUSP00000069505,ENSMUSP00000069616,…	Akr1c18,Ankrd1,Btg2,Cited2,Dnmt3l,Dusp1,Egr1,Eif4ebp3,Hbegf,Hist1h1d,Ier3,Inpp5d,Jun,Junb,Klf2,Mapk15,Mnda,Nr1d1,Nr1d2,Nr1h4,Nr6a1,Per1,Per2,Per3,Pias1,Plk3,Ppp1r15a,Smad7,Zfp36,Zfp36l1
GO:0050731	positive regulation of peptidyl-tyrosine phosphorylation	8	184	0.0326	ENSMUSP00000025363,ENSMUSP00000031325,ENSMUSP00000035120,ENSMUSP00000036203,ENSMUSP00000048736,ENSMUSP00000066488,ENSMUSP00000067066,ENSMUSP00000099462	Adra2a,Agt,Areg,Cck,Hbegf,Lif,Ptger4,Tnfrsf18
GO:0022409	positive regulation of cell-cell adhesion	9	227	0.0328	ENSMUSP00000000193,ENSMUSP00000026999,ENSMUSP00000029574,ENSMUSP00000033056,ENSMUSP00000037042,ENSMUSP00000038405,ENSMUSP00000090089,ENSMUSP00000099423,ENSMUSP00000110102	Ank3,Ccl2,Ccr7,Cited2,Egr3,Nfkbiz,Pycard,Smad7,Vcam1
GO:0051130	positive regulation of cellular component organization	27	1197	0.0329	ENSMUSP00000000193,ENSMUSP00000007248,ENSMUSP00000017881,ENSMUSP00000020171,ENSMUSP00000023610,ENSMUSP00000025691,ENSMUSP00000025718,ENSMUSP00000025850,ENSMUSP00000033056,ENSMUSP00000035120,ENSMUSP00000035781,ENSMUSP00000036347,ENSMUSP00000049488,ENSMUSP00000066488,ENSMUSP00000067066,ENSMUSP00000073099,ENSMUSP00000082137,ENSMUSP00000087098,ENSMUSP00000093270,ENSMUSP00000099073,ENSMUSP00000099423,…	Adamts1,Agt,Akap5,Amigo3,Ankrd1,Cck,Ccl2,Ccr7,Cd53,Ctgf,Epha1,Fas,Flrt1,Fosl1,Hspa1l,Islr2,Jun,Lif,Mapk15,Mmp9,Ppp1r15a,Ptn,Pycard,Robo2,Sgk1,Shank3,Shcbp1l
GO:0071214	cellular response to abiotic stimulus	10	272	0.033	ENSMUSP00000021552,ENSMUSP00000025718,ENSMUSP00000035065,ENSMUSP00000048736,ENSMUSP00000067013,ENSMUSP00000069616,ENSMUSP00000099073,ENSMUSP00000100045,ENSMUSP00000104865,ENSMUSP00000105693	Akr1b3,Ankrd1,Egr1,Gpr68,Pkd1l3,Ptger4,Ptgs2,Ptn,Rhob,Zfp36l1
GO:0030030	cell projection organization	24	1020	0.0331	ENSMUSP00000004389,ENSMUSP00000020692,ENSMUSP00000025691,ENSMUSP00000031325,ENSMUSP00000034472,ENSMUSP00000035120,ENSMUSP00000041053,ENSMUSP00000049380,ENSMUSP00000054938,ENSMUSP00000078336,ENSMUSP00000090089,ENSMUSP00000093442,ENSMUSP00000096775,ENSMUSP00000102711,ENSMUSP00000102745,ENSMUSP00000104932,ENSMUSP00000105053,ENSMUSP00000109010,ENSMUSP00000112776,ENSMUSP00000114074,ENSMUSP00000125993,…	Ablim1,Adm,Ank3,Areg,Arhgef28,Btg2,Camsap3,Ccdc37,Cck,Egr2,Etv1,Fas,Flrt1,Gpr110,Grcc10,Jam3,Jun,Kif5a,Myo7a,Prickle3,Robo2,Sgk1,Shank3,Tnfrsf26
GO:0032715	negative regulation of interleukin-6 production	4	44	0.0331	ENSMUSP00000053092,ENSMUSP00000064823,ENSMUSP00000076189,ENSMUSP00000127941	Inpp5d,Klf2,Nr1h4,Trim30a
GO:0001892	embryonic placenta development	6	108	0.0338	ENSMUSP00000021552,ENSMUSP00000029574,ENSMUSP00000038405,ENSMUSP00000064680,ENSMUSP00000067066,ENSMUSP00000140890	Adm,Cited2,Junb,Lif,Vcam1,Zfp36l1
GO:0007179	transforming growth factor beta receptor signaling pathway	5	74	0.0338	ENSMUSP00000000193,ENSMUSP00000021674,ENSMUSP00000026999,ENSMUSP00000038405,ENSMUSP00000102711	Ccl2,Cited2,Fos,Jun,Smad7
GO:0010558	negative regulation of macromolecule biosynthetic process	29	1322	0.0338	ENSMUSP00000009340,ENSMUSP00000020692,ENSMUSP00000021271,ENSMUSP00000021552,ENSMUSP00000025025,ENSMUSP00000025363,ENSMUSP00000025718,ENSMUSP00000026999,ENSMUSP00000038405,ENSMUSP00000039298,ENSMUSP00000044395,ENSMUSP00000048736,ENSMUSP00000049488,ENSMUSP00000053092,ENSMUSP00000057815,ENSMUSP00000064680,ENSMUSP00000064823,ENSMUSP00000066620,ENSMUSP00000069505,ENSMUSP00000069616,ENSMUSP00000076130,…	Ankrd1,Btg2,Cited2,Dnmt3l,Dusp1,Egr1,Eif4ebp3,Hbegf,Hist1h1d,Inpp5d,Jun,Junb,Klf2,Mapk15,Mnda,Nr1d1,Nr1d2,Nr1h4,Nr6a1,Per1,Per2,Per3,Pias1,Plk3,Ppp1r15a,Ptger4,Smad7,Zfp36,Zfp36l1
GO:0022414	reproductive process	30	1383	0.0338	ENSMUSP00000000193,ENSMUSP00000000421,ENSMUSP00000007248,ENSMUSP00000008626,ENSMUSP00000017881,ENSMUSP00000021552,ENSMUSP00000021635,ENSMUSP00000021674,ENSMUSP00000023610,ENSMUSP00000025850,ENSMUSP00000029574,ENSMUSP00000031325,ENSMUSP00000034472,ENSMUSP00000035065,ENSMUSP00000036203,ENSMUSP00000036347,ENSMUSP00000038405,ENSMUSP00000060893,ENSMUSP00000064680,ENSMUSP00000066488,ENSMUSP00000067066,…	Acrbp,Adamts1,Adm,Adra2a,Agt,Akr1b3,Akr1c18,Areg,Ccl2,Ccnb1ip1,Cited2,Dnmt3l,Egr1,Fos,Fosl1,Gpr149,Hspa1l,Jam3,Junb,Lif,Mmp9,Nr6a1,Pias1,Ptgs2,Ptn,Rnf151,Shcbp1l,Tssk3,Vcam1,Zfp36l1
GO:0030099	myeloid cell differentiation	9	229	0.0338	ENSMUSP00000006614,ENSMUSP00000029623,ENSMUSP00000038405,ENSMUSP00000047393,ENSMUSP00000056008,ENSMUSP00000064680,ENSMUSP00000064823,ENSMUSP00000099423,ENSMUSP00000102711	Bpgm,Ccr7,Cited2,Epha2,Il17c,Jun,Junb,Klf2,Tlr2
GO:0042752	regulation of circadian rhythm	6	108	0.0338	ENSMUSP00000021271,ENSMUSP00000048736,ENSMUSP00000066620,ENSMUSP00000069505,ENSMUSP00000088031,ENSMUSP00000099493	Nr1d1,Nr1d2,Per1,Per2,Per3,Ptger4
GO:0060278	regulation of ovulation	2	5	0.0338	ENSMUSP00000022368,ENSMUSP00000060893	Gpr149,Plau
GO:1990441	negative regulation of transcription from RNA polymerase II promoter in response to endoplasmic reticulum stress	2	5	0.0338	ENSMUSP00000049488,ENSMUSP00000102711	Jun,Ppp1r15a
GO:2001181	positive regulation of interleukin-10 secretion	2	5	0.0338	ENSMUSP00000033056,ENSMUSP00000048736	Ptger4,Pycard
GO:0035994	response to muscle stretch	3	21	0.0342	ENSMUSP00000021674,ENSMUSP00000025718,ENSMUSP00000102711	Ankrd1,Fos,Jun
GO:0050663	cytokine secretion	4	45	0.0344	ENSMUSP00000029623,ENSMUSP00000053092,ENSMUSP00000066488,ENSMUSP00000099423	Agt,Ccr7,Nr1h4,Tlr2
GO:0009636	response to toxic substance	14	471	0.0345	ENSMUSP00000000193,ENSMUSP00000021674,ENSMUSP00000025025,ENSMUSP00000025691,ENSMUSP00000025850,ENSMUSP00000031325,ENSMUSP00000035065,ENSMUSP00000042410,ENSMUSP00000064823,ENSMUSP00000067013,ENSMUSP00000069616,ENSMUSP00000082154,ENSMUSP00000100045,ENSMUSP00000102711	Akr1b3,Areg,Arnt2,Ccl2,Dusp1,Egr1,Fas,Fos,Fosl1,Jun,Klf2,Ptgs2,Rhob,Slc30a1
GO:0006355	regulation of transcription, DNA-templated	54	2952	0.0351	ENSMUSP00000000080,ENSMUSP00000009340,ENSMUSP00000020298,ENSMUSP00000020692,ENSMUSP00000021271,ENSMUSP00000021674,ENSMUSP00000023024,ENSMUSP00000023779,ENSMUSP00000025718,ENSMUSP00000025850,ENSMUSP00000026999,ENSMUSP00000029270,ENSMUSP00000029623,ENSMUSP00000033056,ENSMUSP00000035101,ENSMUSP00000037042,ENSMUSP00000038405,ENSMUSP00000038532,ENSMUSP00000041053,ENSMUSP00000044395,ENSMUSP00000046787,…	Ablim1,Agt,Ankrd1,Arnt2,Btg2,Ccna2,Cited2,Creb5,Csrnp1,Dbp,Dnmt3l,Eda2r,Egr1,Egr2,Egr3,Etv1,Fos,Fosl1,Gpr110,Hist1h1d,Ier2,Jun,Junb,Klf2,Klf6,Lif,Mapk15,Mnda,Nfkbiz,Nr1d1,Nr1d2,Nr1h4,Nr3c2,Nr4a1,Nr6a1,Pcbd1,Per1,Per2,Per3,Pias1,Plk3,Ppp1r15a,Pycard,Smad7,Sp100,Sp110,Tbr1,Tef,Tlr2,Trib1,Trim30a,Usf1,Zfp322a,Zfp36
GO:0006351	transcription, DNA-templated	39	1960	0.0355	ENSMUSP00000000080,ENSMUSP00000003207,ENSMUSP00000009340,ENSMUSP00000020298,ENSMUSP00000020692,ENSMUSP00000021271,ENSMUSP00000021674,ENSMUSP00000023024,ENSMUSP00000023779,ENSMUSP00000025850,ENSMUSP00000026999,ENSMUSP00000035101,ENSMUSP00000037042,ENSMUSP00000038405,ENSMUSP00000038532,ENSMUSP00000041053,ENSMUSP00000046787,ENSMUSP00000053092,ENSMUSP00000060275,ENSMUSP00000061524,ENSMUSP00000064680,…	Arnt2,Btg2,Cited2,Creb5,Csrnp1,Dbp,Egr1,Egr2,Egr3,Etv1,Fos,Fosl1,Ier2,Jun,Junb,Klf2,Klf6,Lipe,Mnda,Nfkbiz,Nr1d1,Nr1d2,Nr1h4,Nr3c2,Nr4a1,Nr6a1,Pcbd1,Per1,Per2,Per3,Pias1,Smad7,Sp100,Sp110,Tbr1,Tef,Trim30a,Usf1,Zfp322a
GO:0010468	regulation of gene expression	65	3720	0.0372	ENSMUSP00000000080,ENSMUSP00000009340,ENSMUSP00000020171,ENSMUSP00000020298,ENSMUSP00000020692,ENSMUSP00000021271,ENSMUSP00000021552,ENSMUSP00000021674,ENSMUSP00000022709,ENSMUSP00000023024,ENSMUSP00000023779,ENSMUSP00000025691,ENSMUSP00000025718,ENSMUSP00000025850,ENSMUSP00000026999,ENSMUSP00000029270,ENSMUSP00000029623,ENSMUSP00000032107,ENSMUSP00000033056,ENSMUSP00000035101,ENSMUSP00000037042,…	Ablim1,Agt,Ank3,Ankrd1,Arnt2,Btg2,Ccna2,Cited2,Creb5,Csrnp1,Ctgf,Cyp3a41a,Dbp,Dnmt3l,Eda2r,Egr1,Egr2,Egr3,Eif4ebp3,Etv1,Fas,Fos,Fosl1,Gpr110,Hist1h1d,Ier2,Jun,Junb,Kbtbd8,Klf2,Klf6,Lif,Mapk15,Mnda,Nfkbiz,Nr1d1,Nr1d2,Nr1h4,Nr3c2,Nr4a1,Nr6a1,Pcbd1,Per1,Per2,Per3,Pias1,Plk3,Ppp1r15a,Ptger4,Pycard,Ramp3,Rbm20,Smad7,Sp100,Sp110,Spry2,Tbr1,Tef,Tlr2,Trib1,Trim30a,Usf1,Zfp322a,Zfp36,Zfp36l1
GO:0030728	ovulation	3	22	0.0377	ENSMUSP00000023610,ENSMUSP00000035065,ENSMUSP00000066488	Adamts1,Agt,Ptgs2
GO:0001701	in utero embryonic development	13	426	0.0378	ENSMUSP00000021552,ENSMUSP00000025363,ENSMUSP00000025850,ENSMUSP00000029574,ENSMUSP00000038405,ENSMUSP00000042410,ENSMUSP00000064680,ENSMUSP00000064823,ENSMUSP00000067066,ENSMUSP00000082154,ENSMUSP00000093622,ENSMUSP00000121562,ENSMUSP00000140890	Adm,Arnt2,Ccnb1ip1,Cited2,Dnmt3l,Fosl1,Hbegf,Junb,Klf2,Lif,Slc30a1,Vcam1,Zfp36l1
GO:0032270	positive regulation of cellular protein metabolic process	31	1462	0.0381	ENSMUSP00000000193,ENSMUSP00000017881,ENSMUSP00000020171,ENSMUSP00000022212,ENSMUSP00000022709,ENSMUSP00000025363,ENSMUSP00000025691,ENSMUSP00000026672,ENSMUSP00000026999,ENSMUSP00000029623,ENSMUSP00000031325,ENSMUSP00000033056,ENSMUSP00000035065,ENSMUSP00000035120,ENSMUSP00000036203,ENSMUSP00000047518,ENSMUSP00000048736,ENSMUSP00000049488,ENSMUSP00000066488,ENSMUSP00000067066,ENSMUSP00000068834,…	Acrbp,Adra2a,Agt,Akap5,Areg,Cck,Ccl2,Ccr7,Ctgf,Eda2r,Egr1,Fas,Hbegf,Jun,Lif,Mapk15,Mmp9,Pde8a,Pias1,Plk2,Plk3,Ppp1r15a,Ptger4,Ptgs2,Pycard,Ramp3,Smad7,Spry2,Tlr2,Tnfrsf18,Trib1
GO:1902622	regulation of neutrophil migration	4	47	0.0387	ENSMUSP00000031327,ENSMUSP00000034472,ENSMUSP00000048736,ENSMUSP00000099423	Ccr7,Cxcl1,Jam3,Ptger4
GO:0044419	interspecies interaction between organisms	9	237	0.0396	ENSMUSP00000000193,ENSMUSP00000017881,ENSMUSP00000024699,ENSMUSP00000029574,ENSMUSP00000029623,ENSMUSP00000101828,ENSMUSP00000102711,ENSMUSP00000125729,ENSMUSP00000132435	Ccl2,Cldn6,Gbp2,Gbp3,Jun,Mmp9,Tlr2,Usf1,Vcam1
GO:0048812	neuron projection morphogenesis	13	429	0.0396	ENSMUSP00000004389,ENSMUSP00000035120,ENSMUSP00000041053,ENSMUSP00000054938,ENSMUSP00000078336,ENSMUSP00000090089,ENSMUSP00000093442,ENSMUSP00000096775,ENSMUSP00000104932,ENSMUSP00000105053,ENSMUSP00000109010,ENSMUSP00000112776,ENSMUSP00000114074	Ablim1,Ank3,Arhgef28,Cck,Egr2,Etv1,Flrt1,Grcc10,Kif5a,Robo2,Sgk1,Shank3,Tnfrsf26
GO:0120036	plasma membrane bounded cell projection organization	23	982	0.0396	ENSMUSP00000004389,ENSMUSP00000020692,ENSMUSP00000025691,ENSMUSP00000031325,ENSMUSP00000034472,ENSMUSP00000035120,ENSMUSP00000041053,ENSMUSP00000049380,ENSMUSP00000054938,ENSMUSP00000078336,ENSMUSP00000090089,ENSMUSP00000093442,ENSMUSP00000096775,ENSMUSP00000102711,ENSMUSP00000102745,ENSMUSP00000104932,ENSMUSP00000105053,ENSMUSP00000109010,ENSMUSP00000112776,ENSMUSP00000114074,ENSMUSP00000125993,…	Ablim1,Adm,Ank3,Areg,Arhgef28,Btg2,Camsap3,Ccdc37,Cck,Egr2,Etv1,Fas,Flrt1,Gpr110,Grcc10,Jam3,Jun,Kif5a,Myo7a,Robo2,Sgk1,Shank3,Tnfrsf26
GO:0051050	positive regulation of transport	23	987	0.0415	ENSMUSP00000000193,ENSMUSP00000007248,ENSMUSP00000025718,ENSMUSP00000029623,ENSMUSP00000031327,ENSMUSP00000033056,ENSMUSP00000035065,ENSMUSP00000035120,ENSMUSP00000047518,ENSMUSP00000048148,ENSMUSP00000048736,ENSMUSP00000053092,ENSMUSP00000054086,ENSMUSP00000066488,ENSMUSP00000067066,ENSMUSP00000076130,ENSMUSP00000090089,ENSMUSP00000093270,ENSMUSP00000099423,ENSMUSP00000099521,ENSMUSP00000104932,…	Agt,Akap5,Ank3,Ankrd1,Cck,Ccl2,Ccr7,Cox17,Cxcl1,Gpr68,Hspa1l,Lif,Nppb,Nr1h4,Plk3,Ptger4,Ptgs2,Pycard,Ramp3,Sgk1,Shank3,Stac3,Tlr2
GO:0000820	regulation of glutamine family amino acid metabolic process	2	6	0.042	ENSMUSP00000000984,ENSMUSP00000053092	Nr1h4,Slc7a7
GO:0001661	conditioned taste aversion	2	6	0.042	ENSMUSP00000021674,ENSMUSP00000046787	Fos,Tbr1
GO:0007623	circadian rhythm	7	154	0.042	ENSMUSP00000021271,ENSMUSP00000025691,ENSMUSP00000066620,ENSMUSP00000069505,ENSMUSP00000079693,ENSMUSP00000099493,ENSMUSP00000102711	Dbp,Fas,Jun,Nr1d1,Per1,Per2,Per3
GO:0044597	daunorubicin metabolic process	2	6	0.042	ENSMUSP00000021635,ENSMUSP00000100045	Akr1b3,Akr1c18
GO:0044598	doxorubicin metabolic process	2	6	0.042	ENSMUSP00000021635,ENSMUSP00000100045	Akr1b3,Akr1c18
GO:0045862	positive regulation of proteolysis	11	334	0.042	ENSMUSP00000020171,ENSMUSP00000022212,ENSMUSP00000025691,ENSMUSP00000026999,ENSMUSP00000033056,ENSMUSP00000035120,ENSMUSP00000036203,ENSMUSP00000068834,ENSMUSP00000076130,ENSMUSP00000085632,ENSMUSP00000096248	Acrbp,Adra2a,Cck,Ctgf,Fas,Pias1,Plk2,Plk3,Pycard,Smad7,Trib1
GO:0048584	positive regulation of response to stimulus	38	1922	0.042	ENSMUSP00000000193,ENSMUSP00000017881,ENSMUSP00000020171,ENSMUSP00000021635,ENSMUSP00000022709,ENSMUSP00000025197,ENSMUSP00000025363,ENSMUSP00000025691,ENSMUSP00000025718,ENSMUSP00000026672,ENSMUSP00000029623,ENSMUSP00000031327,ENSMUSP00000033056,ENSMUSP00000035065,ENSMUSP00000036203,ENSMUSP00000038405,ENSMUSP00000047518,ENSMUSP00000047968,ENSMUSP00000048736,ENSMUSP00000049488,ENSMUSP00000052085,…	Acox2,Adra2a,Agt,Akap5,Akr1b3,Akr1c18,Ankrd1,Blnk,C1s1,Ccl2,Ccr7,Cited2,Ctgf,Cxcl1,Daam2,Eda2r,Fas,Gpr68,Hbegf,Il17c,Jun,Lif,Mmp9,Nfkbiz,Nr1h4,Pde8a,Ppp1r15a,Ptger4,Ptgs2,Pycard,Ramp3,Robo2,S100b,Shank3,Spry2,Tap2,Tlr2,Tnfrsf18
GO:0071901	negative regulation of protein serine/threonine kinase activity	6	115	0.042	ENSMUSP00000020118,ENSMUSP00000022709,ENSMUSP00000025025,ENSMUSP00000025295,ENSMUSP00000033056,ENSMUSP00000049292	Dusp1,Dusp6,Pycard,Spry1,Spry2,Spry4
GO:0097647	amylin receptor signaling pathway	2	6	0.042	ENSMUSP00000047518,ENSMUSP00000140890	Adm,Ramp3
GO:0033209	tumor necrosis factor-mediated signaling pathway	4	49	0.0424	ENSMUSP00000025691,ENSMUSP00000033056,ENSMUSP00000054938,ENSMUSP00000099462	Fas,Pycard,Tnfrsf18,Tnfrsf26
GO:0007155	cell adhesion	18	705	0.0431	ENSMUSP00000006614,ENSMUSP00000016172,ENSMUSP00000016315,ENSMUSP00000020171,ENSMUSP00000021552,ENSMUSP00000024699,ENSMUSP00000029574,ENSMUSP00000034472,ENSMUSP00000045142,ENSMUSP00000057563,ENSMUSP00000066488,ENSMUSP00000066880,ENSMUSP00000067013,ENSMUSP00000073099,ENSMUSP00000082137,ENSMUSP00000109010,ENSMUSP00000112776,ENSMUSP00000125993	Agt,Amigo3,Cadm4,Camsap3,Celsr1,Cldn6,Ctgf,Epha1,Epha2,Flrt1,Gp1ba,Islr,Jam3,Lamb3,Rhob,Robo2,Vcam1,Zfp36l1
GO:0019219	regulation of nucleobase-containing compound metabolic process	60	3407	0.0435	ENSMUSP00000000080,ENSMUSP00000003635,ENSMUSP00000009340,ENSMUSP00000020298,ENSMUSP00000020692,ENSMUSP00000021271,ENSMUSP00000021552,ENSMUSP00000021674,ENSMUSP00000023024,ENSMUSP00000023779,ENSMUSP00000025025,ENSMUSP00000025718,ENSMUSP00000025850,ENSMUSP00000026999,ENSMUSP00000029270,ENSMUSP00000029623,ENSMUSP00000033056,ENSMUSP00000035101,ENSMUSP00000037042,ENSMUSP00000038405,ENSMUSP00000038532,…	Ablim1,Agt,Ankrd1,Arnt2,Bpgm,Btg2,Ccna2,Cited2,Creb5,Csrnp1,Dbp,Dnmt3l,Dusp1,Eda2r,Egr1,Egr2,Egr3,Etv1,Fos,Fosl1,Gpr110,Hist1h1d,Ier2,Ier3,Jun,Junb,Klf2,Klf6,Lif,Mapk15,Mnda,Nfkbiz,Nr1d1,Nr1d2,Nr1h4,Nr3c2,Nr4a1,Nr6a1,Pcbd1,Per1,Per2,Per3,Pias1,Plk3,Ppp1r15a,Pycard,Rad52,Rbm20,Smad7,Sp100,Sp110,Tbr1,Tef,Tlr2,Trib1,Trim30a,Usf1,Zfp322a,Zfp36,Zfp36l1
GO:0032642	regulation of chemokine production	5	81	0.0437	ENSMUSP00000006614,ENSMUSP00000029623,ENSMUSP00000033056,ENSMUSP00000053092,ENSMUSP00000069616	Egr1,Epha2,Nr1h4,Pycard,Tlr2
GO:2000243	positive regulation of reproductive process	5	81	0.0437	ENSMUSP00000022368,ENSMUSP00000038405,ENSMUSP00000048736,ENSMUSP00000087098,ENSMUSP00000098928	Cited2,Mapk15,Plau,Plb1,Ptger4
GO:0051769	regulation of nitric-oxide synthase biosynthetic process	3	24	0.0439	ENSMUSP00000000193,ENSMUSP00000029623,ENSMUSP00000048736	Ccl2,Ptger4,Tlr2
GO:1904467	regulation of tumor necrosis factor secretion	3	24	0.0439	ENSMUSP00000029623,ENSMUSP00000048736,ENSMUSP00000053092	Nr1h4,Ptger4,Tlr2
GO:0048667	cell morphogenesis involved in neuron differentiation	12	389	0.0455	ENSMUSP00000004389,ENSMUSP00000035120,ENSMUSP00000041053,ENSMUSP00000054938,ENSMUSP00000078336,ENSMUSP00000090089,ENSMUSP00000093442,ENSMUSP00000096775,ENSMUSP00000102745,ENSMUSP00000104932,ENSMUSP00000105053,ENSMUSP00000112776	Ablim1,Ank3,Arhgef28,Cck,Egr2,Etv1,Grcc10,Kif5a,Myo7a,Robo2,Shank3,Tnfrsf26
GO:0023056	positive regulation of signaling	33	1615	0.0457	ENSMUSP00000000193,ENSMUSP00000017881,ENSMUSP00000020171,ENSMUSP00000021635,ENSMUSP00000022212,ENSMUSP00000022709,ENSMUSP00000025363,ENSMUSP00000025691,ENSMUSP00000025718,ENSMUSP00000026672,ENSMUSP00000029623,ENSMUSP00000033056,ENSMUSP00000035065,ENSMUSP00000036203,ENSMUSP00000038405,ENSMUSP00000047518,ENSMUSP00000047968,ENSMUSP00000048736,ENSMUSP00000052085,ENSMUSP00000053092,ENSMUSP00000057844,…	Adra2a,Agt,Akap5,Akr1b3,Akr1c18,Ankrd1,Blnk,Ccl2,Ccr7,Cited2,Ctgf,Daam2,Eda2r,Fas,Gpr68,Hbegf,Jun,Lif,Mmp9,Nr1h4,Pde8a,Plk2,Ptger4,Ptgs2,Ptn,Pycard,Ramp3,Robo2,S100b,Shank3,Spry2,Tlr2,Tnfrsf18
GO:0002521	leukocyte differentiation	11	340	0.0459	ENSMUSP00000006614,ENSMUSP00000021552,ENSMUSP00000025691,ENSMUSP00000029623,ENSMUSP00000038405,ENSMUSP00000048736,ENSMUSP00000056008,ENSMUSP00000064680,ENSMUSP00000069616,ENSMUSP00000099423,ENSMUSP00000102711	Ccr7,Cited2,Egr1,Epha2,Fas,Il17c,Jun,Junb,Ptger4,Tlr2,Zfp36l1
GO:0009991	response to extracellular stimulus	14	493	0.0459	ENSMUSP00000000193,ENSMUSP00000017881,ENSMUSP00000021674,ENSMUSP00000025691,ENSMUSP00000025850,ENSMUSP00000028160,ENSMUSP00000035065,ENSMUSP00000035120,ENSMUSP00000053092,ENSMUSP00000057815,ENSMUSP00000099073,ENSMUSP00000102711,ENSMUSP00000125729,ENSMUSP00000140890	Adm,Cck,Ccl2,Fas,Fos,Fosl1,Jun,Mmp9,Nr1h4,Ptgs2,Ptn,Slc25a25,Usf1,Zfp36
GO:0043270	positive regulation of ion transport	10	293	0.0471	ENSMUSP00000031327,ENSMUSP00000035120,ENSMUSP00000047518,ENSMUSP00000048148,ENSMUSP00000054086,ENSMUSP00000066488,ENSMUSP00000090089,ENSMUSP00000093270,ENSMUSP00000104932,ENSMUSP00000114074	Agt,Akap5,Ank3,Cck,Cox17,Cxcl1,Ramp3,Sgk1,Shank3,Stac3
GO:1905809	negative regulation of synapse organization	3	25	0.0478	ENSMUSP00000029623,ENSMUSP00000066894,ENSMUSP00000099073	Ngef,Ptn,Tlr2
GO:0051252	regulation of RNA metabolic process	56	3152	0.0484	ENSMUSP00000000080,ENSMUSP00000009340,ENSMUSP00000020298,ENSMUSP00000020692,ENSMUSP00000021271,ENSMUSP00000021552,ENSMUSP00000021674,ENSMUSP00000023024,ENSMUSP00000023779,ENSMUSP00000025718,ENSMUSP00000025850,ENSMUSP00000026999,ENSMUSP00000029270,ENSMUSP00000029623,ENSMUSP00000033056,ENSMUSP00000035101,ENSMUSP00000037042,ENSMUSP00000038405,ENSMUSP00000038532,ENSMUSP00000041053,ENSMUSP00000044395,…	Ablim1,Agt,Ankrd1,Arnt2,Btg2,Ccna2,Cited2,Creb5,Csrnp1,Dbp,Dnmt3l,Eda2r,Egr1,Egr2,Egr3,Etv1,Fos,Fosl1,Gpr110,Hist1h1d,Ier2,Jun,Junb,Klf2,Klf6,Lif,Mapk15,Mnda,Nfkbiz,Nr1d1,Nr1d2,Nr1h4,Nr3c2,Nr4a1,Nr6a1,Pcbd1,Per1,Per2,Per3,Pias1,Plk3,Ppp1r15a,Pycard,Rbm20,Smad7,Sp100,Sp110,Tbr1,Tef,Tlr2,Trib1,Trim30a,Usf1,Zfp322a,Zfp36,Zfp36l1
GO:0001570	vasculogenesis	5	84	0.049	ENSMUSP00000006614,ENSMUSP00000021552,ENSMUSP00000038405,ENSMUSP00000064680,ENSMUSP00000140890	Adm,Cited2,Epha2,Junb,Zfp36l1
GO:0009611	response to wounding	12	394	0.0492	ENSMUSP00000000193,ENSMUSP00000016172,ENSMUSP00000021552,ENSMUSP00000022368,ENSMUSP00000025363,ENSMUSP00000034472,ENSMUSP00000036203,ENSMUSP00000037246,ENSMUSP00000057563,ENSMUSP00000057815,ENSMUSP00000102711,ENSMUSP00000140890	Adm,Adra2a,Ccl2,Celsr1,Gp1ba,Hbegf,Igsf10,Jam3,Jun,Plau,Zfp36,Zfp36l1
GO:0043409	negative regulation of MAPK cascade	7	161	0.0495	ENSMUSP00000020118,ENSMUSP00000021271,ENSMUSP00000022709,ENSMUSP00000025025,ENSMUSP00000025295,ENSMUSP00000049292,ENSMUSP00000067066	Dusp1,Dusp6,Lif,Per1,Spry1,Spry2,Spry4
GO:0060291	long-term synaptic potentiation	4	52	0.0495	ENSMUSP00000022212,ENSMUSP00000047968,ENSMUSP00000099073,ENSMUSP00000104932	Plk2,Ptn,S100b,Shank3
GO:0070374	positive regulation of ERK1 and ERK2 cascade	8	204	0.0496	ENSMUSP00000000193,ENSMUSP00000020171,ENSMUSP00000022709,ENSMUSP00000026672,ENSMUSP00000029623,ENSMUSP00000033056,ENSMUSP00000047518,ENSMUSP00000102711	Ccl2,Ctgf,Jun,Pde8a,Pycard,Ramp3,Spry2,Tlr2
GO:0031086	nuclear-transcribed mRNA catabolic process, deadenylation-independent decay	2	7	0.0497	ENSMUSP00000021552,ENSMUSP00000057815	Zfp36,Zfp36l1
GO:0045656	negative regulation of monocyte differentiation	2	7	0.0497	ENSMUSP00000105693,ENSMUSP00000127941	Gpr68,Inpp5d
GO:0060449	bud elongation involved in lung branching	2	7	0.0497	ENSMUSP00000022709,ENSMUSP00000049292	Spry1,Spry2
GO:1902172	regulation of keratinocyte apoptotic process	2	7	0.0497	ENSMUSP00000021552,ENSMUSP00000057815	Zfp36,Zfp36l1

## Sheet: MF
#term ID	term description	observed gene count	background gene count	false discovery rate	matching proteins in your network (IDs)	matching proteins in your network (labels)
GO:0000981	DNA-binding transcription factor activity, RNA polymerase II-specific	26	724	0.0013	ENSMUSP00000000080,ENSMUSP00000009340,ENSMUSP00000020692,ENSMUSP00000021674,ENSMUSP00000023024,ENSMUSP00000023779,ENSMUSP00000025850,ENSMUSP00000035101,ENSMUSP00000037042,ENSMUSP00000038532,ENSMUSP00000041053,ENSMUSP00000046787,ENSMUSP00000053092,ENSMUSP00000060275,ENSMUSP00000064680,ENSMUSP00000064823,ENSMUSP00000069505,ENSMUSP00000069616,ENSMUSP00000079693,ENSMUSP00000082154,ENSMUSP00000088031,…	Arnt2,Btg2,Creb5,Csrnp1,Dbp,Egr1,Egr2,Egr3,Etv1,Fos,Fosl1,Ier2,Jun,Junb,Klf2,Klf6,Mnda,Nr1d1,Nr1d2,Nr1h4,Nr3c2,Nr4a1,Nr6a1,Tbr1,Tef,Usf1
GO:0001228	DNA-binding transcription activator activity, RNA polymerase II-specific	19	409	0.0013	ENSMUSP00000000080,ENSMUSP00000021674,ENSMUSP00000023024,ENSMUSP00000023779,ENSMUSP00000025850,ENSMUSP00000035101,ENSMUSP00000037042,ENSMUSP00000038532,ENSMUSP00000041053,ENSMUSP00000046787,ENSMUSP00000053092,ENSMUSP00000060275,ENSMUSP00000064680,ENSMUSP00000069616,ENSMUSP00000079693,ENSMUSP00000082154,ENSMUSP00000093442,ENSMUSP00000102711,ENSMUSP00000108498	Arnt2,Creb5,Csrnp1,Dbp,Egr1,Egr2,Egr3,Etv1,Fos,Fosl1,Ier2,Jun,Junb,Klf6,Nr1h4,Nr4a1,Nr6a1,Tbr1,Tef
GO:0003700	DNA-binding transcription factor activity	29	945	0.0022	ENSMUSP00000000080,ENSMUSP00000009340,ENSMUSP00000020692,ENSMUSP00000021674,ENSMUSP00000023024,ENSMUSP00000023779,ENSMUSP00000025850,ENSMUSP00000026999,ENSMUSP00000035101,ENSMUSP00000037042,ENSMUSP00000038405,ENSMUSP00000038532,ENSMUSP00000041053,ENSMUSP00000046787,ENSMUSP00000053092,ENSMUSP00000060275,ENSMUSP00000061524,ENSMUSP00000064680,ENSMUSP00000064823,ENSMUSP00000069505,ENSMUSP00000069616,…	Arnt2,Btg2,Cited2,Creb5,Csrnp1,Dbp,Egr1,Egr2,Egr3,Etv1,Fos,Fosl1,Ier2,Jun,Junb,Klf2,Klf6,Mnda,Nr1d1,Nr1d2,Nr1h4,Nr3c2,Nr4a1,Nr6a1,Smad7,Tbr1,Tef,Usf1,Zfp322a
GO:0003707	steroid hormone receptor activity	7	58	0.0022	ENSMUSP00000023779,ENSMUSP00000053092,ENSMUSP00000069505,ENSMUSP00000088031,ENSMUSP00000105538,ENSMUSP00000108498,ENSMUSP00000114166	Nr1d1,Nr1d2,Nr1h4,Nr3c2,Nr4a1,Nr6a1,Paqr6
GO:0140110	transcription regulator activity	34	1256	0.0033	ENSMUSP00000000080,ENSMUSP00000009340,ENSMUSP00000020298,ENSMUSP00000020692,ENSMUSP00000021674,ENSMUSP00000023024,ENSMUSP00000023779,ENSMUSP00000025718,ENSMUSP00000025850,ENSMUSP00000026999,ENSMUSP00000035101,ENSMUSP00000037042,ENSMUSP00000038405,ENSMUSP00000038532,ENSMUSP00000041053,ENSMUSP00000046787,ENSMUSP00000053092,ENSMUSP00000060275,ENSMUSP00000061524,ENSMUSP00000064680,ENSMUSP00000064823,…	Ankrd1,Arnt2,Btg2,Cited2,Creb5,Csrnp1,Dbp,Egr1,Egr2,Egr3,Etv1,Fos,Fosl1,Ier2,Jun,Junb,Klf2,Klf6,Mnda,Nfkbiz,Nr1d1,Nr1d2,Nr1h4,Nr3c2,Nr4a1,Nr6a1,Pcbd1,Per2,Pias1,Smad7,Tbr1,Tef,Usf1,Zfp322a
GO:0005102	signaling receptor binding	36	1515	0.0212	ENSMUSP00000000193,ENSMUSP00000020171,ENSMUSP00000023779,ENSMUSP00000025197,ENSMUSP00000025363,ENSMUSP00000026999,ENSMUSP00000029574,ENSMUSP00000029623,ENSMUSP00000030674,ENSMUSP00000031325,ENSMUSP00000031327,ENSMUSP00000033056,ENSMUSP00000034472,ENSMUSP00000035120,ENSMUSP00000036203,ENSMUSP00000047968,ENSMUSP00000053092,ENSMUSP00000056008,ENSMUSP00000057844,ENSMUSP00000066488,ENSMUSP00000066620,…	Acox2,Adm,Adra2a,Agt,Akap5,Areg,Arnt2,Blnk,Cadm4,Cck,Ccl2,Cd160,Ctgf,Cxcl1,Flrt1,H60b,Hbegf,Il17c,Jam3,Lif,Matk,Ngef,Nppb,Nr1h4,Nr4a1,Per2,Ptn,Pycard,S100b,Shank3,Smad7,Sytl1,Tap2,Tlr2,Vcam1,Wfikkn1
GO:0060089	molecular transducer activity	28	1071	0.0224	ENSMUSP00000006614,ENSMUSP00000016172,ENSMUSP00000023779,ENSMUSP00000025691,ENSMUSP00000026999,ENSMUSP00000029270,ENSMUSP00000029623,ENSMUSP00000036203,ENSMUSP00000047518,ENSMUSP00000048736,ENSMUSP00000049380,ENSMUSP00000053092,ENSMUSP00000054938,ENSMUSP00000060893,ENSMUSP00000069505,ENSMUSP00000073099,ENSMUSP00000088031,ENSMUSP00000088642,ENSMUSP00000094082,ENSMUSP00000099423,ENSMUSP00000099462,…	Adra2a,Ccna2,Ccr7,Cd160,Celsr1,Csf2rb,Eda2r,Epha1,Epha2,Fas,Gpr110,Gpr149,Gpr68,Nr1d1,Nr1d2,Nr1h4,Nr3c2,Nr4a1,Nr6a1,P2ry14,Paqr6,Ptger4,Ramp3,Robo2,Smad7,Tlr2,Tnfrsf18,Tnfrsf26
GO:0000977	RNA polymerase II regulatory region sequence-specific DNA binding	20	677	0.0303	ENSMUSP00000000080,ENSMUSP00000009340,ENSMUSP00000021271,ENSMUSP00000021674,ENSMUSP00000023024,ENSMUSP00000025850,ENSMUSP00000041053,ENSMUSP00000046787,ENSMUSP00000053092,ENSMUSP00000060275,ENSMUSP00000064680,ENSMUSP00000066620,ENSMUSP00000069505,ENSMUSP00000069616,ENSMUSP00000079693,ENSMUSP00000082154,ENSMUSP00000088031,ENSMUSP00000093442,ENSMUSP00000102711,ENSMUSP00000108498	Arnt2,Dbp,Egr1,Egr2,Etv1,Fos,Fosl1,Ier2,Jun,Junb,Klf6,Mnda,Nr1d1,Nr1d2,Nr1h4,Nr6a1,Per1,Per2,Tbr1,Tef
GO:0000978	RNA polymerase II proximal promoter sequence-specific DNA binding	16	480	0.0303	ENSMUSP00000000080,ENSMUSP00000009340,ENSMUSP00000021271,ENSMUSP00000021674,ENSMUSP00000023024,ENSMUSP00000025850,ENSMUSP00000041053,ENSMUSP00000046787,ENSMUSP00000053092,ENSMUSP00000064680,ENSMUSP00000069505,ENSMUSP00000082154,ENSMUSP00000088031,ENSMUSP00000093442,ENSMUSP00000102711,ENSMUSP00000108498	Arnt2,Egr2,Etv1,Fos,Fosl1,Jun,Junb,Klf6,Mnda,Nr1d1,Nr1d2,Nr1h4,Nr6a1,Per1,Tbr1,Tef
GO:0004879	nuclear receptor activity	5	47	0.0303	ENSMUSP00000023779,ENSMUSP00000053092,ENSMUSP00000088031,ENSMUSP00000105538,ENSMUSP00000108498	Nr1d2,Nr1h4,Nr3c2,Nr4a1,Nr6a1
GO:0005515	protein binding	108	6454	0.0303	ENSMUSP00000000193,ENSMUSP00000001183,ENSMUSP00000003207,ENSMUSP00000007248,ENSMUSP00000009340,ENSMUSP00000016172,ENSMUSP00000017751,ENSMUSP00000017881,ENSMUSP00000020171,ENSMUSP00000020298,ENSMUSP00000021271,ENSMUSP00000021458,ENSMUSP00000021552,ENSMUSP00000021674,ENSMUSP00000022212,ENSMUSP00000022327,ENSMUSP00000022709,ENSMUSP00000023024,ENSMUSP00000023779,ENSMUSP00000024699,ENSMUSP00000025025,…	Ablim1,Acox2,Adm,Adra2a,Agt,Akap5,Amotl2,Ank3,Ankrd1,Areg,Arhgef28,Arl4c,Arnt2,Blnk,C1s1,Cadm4,Camsap3,Ccdc64b,Cck,Ccl2,Ccna2,Ccr7,Cd160,Celsr1,Cited2,Cldn6,Ctgf,Cul9,Cxcl1,Daam2,Dlgap2,Dnmt3l,Dusp1,Egr1,Egr2,Eif4ebp3,Epha1,Fam101a,Fas,Flrt1,Fos,Ftcd,Gbp2,Gbp3,H60b,Hbegf,Hspa1l,Htra4,Ifit3,Il17c,Inpp5d,Jam3,Jun,Junb,Kcnd3,Kif5a,Ldb3,Lif,Lipe,Matk,Mmp9,Mnda,Myo7a,Ngef,Nppb,Nr1d1,Nr1h4,Nr3c2,Nr4a1,…
GO:0019900	kinase binding	21	737	0.0303	ENSMUSP00000003207,ENSMUSP00000021271,ENSMUSP00000022327,ENSMUSP00000022709,ENSMUSP00000025025,ENSMUSP00000025691,ENSMUSP00000026672,ENSMUSP00000029270,ENSMUSP00000036203,ENSMUSP00000046787,ENSMUSP00000049488,ENSMUSP00000057815,ENSMUSP00000057844,ENSMUSP00000066620,ENSMUSP00000068834,ENSMUSP00000073099,ENSMUSP00000093270,ENSMUSP00000099073,ENSMUSP00000099493,ENSMUSP00000114074,ENSMUSP00000125729	Adra2a,Akap5,Blnk,Ccna2,Dusp1,Epha1,Fas,Ldb3,Lipe,Pde8a,Per1,Per2,Per3,Ppp1r15a,Ptn,Sgk1,Spry2,Tbr1,Trib1,Usf1,Zfp36
GO:0038023	signaling receptor activity	26	1020	0.0303	ENSMUSP00000006614,ENSMUSP00000016172,ENSMUSP00000023779,ENSMUSP00000025691,ENSMUSP00000029623,ENSMUSP00000036203,ENSMUSP00000047518,ENSMUSP00000048736,ENSMUSP00000049380,ENSMUSP00000053092,ENSMUSP00000054938,ENSMUSP00000060893,ENSMUSP00000069505,ENSMUSP00000073099,ENSMUSP00000088031,ENSMUSP00000088642,ENSMUSP00000094082,ENSMUSP00000099423,ENSMUSP00000099462,ENSMUSP00000102689,ENSMUSP00000105538,…	Adra2a,Ccr7,Cd160,Celsr1,Csf2rb,Eda2r,Epha1,Epha2,Fas,Gpr110,Gpr149,Gpr68,Nr1d1,Nr1d2,Nr1h4,Nr3c2,Nr4a1,Nr6a1,P2ry14,Paqr6,Ptger4,Ramp3,Robo2,Tlr2,Tnfrsf18,Tnfrsf26
GO:0043565	sequence-specific DNA binding	26	1006	0.0303	ENSMUSP00000000080,ENSMUSP00000009340,ENSMUSP00000021271,ENSMUSP00000021674,ENSMUSP00000023024,ENSMUSP00000023779,ENSMUSP00000025850,ENSMUSP00000035101,ENSMUSP00000037042,ENSMUSP00000041053,ENSMUSP00000046787,ENSMUSP00000053092,ENSMUSP00000060275,ENSMUSP00000064680,ENSMUSP00000064823,ENSMUSP00000066620,ENSMUSP00000069505,ENSMUSP00000069616,ENSMUSP00000079693,ENSMUSP00000082154,ENSMUSP00000088031,…	Arnt2,Csrnp1,Dbp,Egr1,Egr2,Egr3,Etv1,Fos,Fosl1,Ier2,Jun,Junb,Klf2,Klf6,Mnda,Nr1d1,Nr1d2,Nr1h4,Nr3c2,Nr4a1,Nr6a1,Per1,Per2,Tbr1,Tef,Usf1
GO:0046332	SMAD binding	6	79	0.0303	ENSMUSP00000021674,ENSMUSP00000025718,ENSMUSP00000026999,ENSMUSP00000038405,ENSMUSP00000039950,ENSMUSP00000102711	Ankrd1,Cited2,Fos,Jun,Pmepa1,Smad7
GO:0070412	R-SMAD binding	4	25	0.0303	ENSMUSP00000021674,ENSMUSP00000025718,ENSMUSP00000039950,ENSMUSP00000102711	Ankrd1,Fos,Jun,Pmepa1
GO:0008270	zinc ion binding	19	668	0.0325	ENSMUSP00000008626,ENSMUSP00000017881,ENSMUSP00000023610,ENSMUSP00000023611,ENSMUSP00000023779,ENSMUSP00000028897,ENSMUSP00000047968,ENSMUSP00000053092,ENSMUSP00000069505,ENSMUSP00000069616,ENSMUSP00000076189,ENSMUSP00000088031,ENSMUSP00000096248,ENSMUSP00000104932,ENSMUSP00000105538,ENSMUSP00000105861,ENSMUSP00000108498,ENSMUSP00000127892,ENSMUSP00000129447	Adam33,Adamts1,Adamts5,Cpxm1,Egr1,Mmp9,Nr1d1,Nr1d2,Nr1h4,Nr3c2,Nr4a1,Nr6a1,Pias1,Prickle3,Rbm20,Rnf151,S100b,Shank3,Trim30a
GO:0003690	double-stranded DNA binding	22	840	0.0331	ENSMUSP00000000080,ENSMUSP00000009340,ENSMUSP00000021271,ENSMUSP00000021674,ENSMUSP00000023024,ENSMUSP00000025850,ENSMUSP00000041053,ENSMUSP00000046787,ENSMUSP00000053092,ENSMUSP00000060275,ENSMUSP00000064680,ENSMUSP00000066620,ENSMUSP00000069505,ENSMUSP00000069616,ENSMUSP00000079693,ENSMUSP00000082154,ENSMUSP00000088031,ENSMUSP00000093442,ENSMUSP00000102711,ENSMUSP00000105538,ENSMUSP00000108498,…	Arnt2,Dbp,Egr1,Egr2,Etv1,Fos,Fosl1,Ier2,Jun,Junb,Klf6,Mnda,Nr1d1,Nr1d2,Nr1h4,Nr3c2,Nr6a1,Per1,Per2,Tbr1,Tef,Usf1
GO:0044212	transcription regulatory region DNA binding	22	834	0.0331	ENSMUSP00000000080,ENSMUSP00000009340,ENSMUSP00000021271,ENSMUSP00000021674,ENSMUSP00000023024,ENSMUSP00000025850,ENSMUSP00000026999,ENSMUSP00000041053,ENSMUSP00000046787,ENSMUSP00000053092,ENSMUSP00000060275,ENSMUSP00000061524,ENSMUSP00000064680,ENSMUSP00000066620,ENSMUSP00000069505,ENSMUSP00000069616,ENSMUSP00000079693,ENSMUSP00000082154,ENSMUSP00000088031,ENSMUSP00000093442,ENSMUSP00000102711,…	Arnt2,Dbp,Egr1,Egr2,Etv1,Fos,Fosl1,Ier2,Jun,Junb,Klf6,Mnda,Nr1d1,Nr1d2,Nr1h4,Nr6a1,Per1,Per2,Smad7,Tbr1,Tef,Zfp322a
GO:0008107	galactoside 2-alpha-L-fucosyltransferase activity	2	3	0.0374	ENSMUSP00000045229,ENSMUSP00000063719	Fut2,Sec1
GO:0001102	RNA polymerase II activating transcription factor binding	4	38	0.0419	ENSMUSP00000021674,ENSMUSP00000038405,ENSMUSP00000041053,ENSMUSP00000102711	Cited2,Egr2,Fos,Jun
GO:0003677	DNA binding	39	1897	0.0419	ENSMUSP00000000080,ENSMUSP00000009340,ENSMUSP00000021271,ENSMUSP00000021552,ENSMUSP00000021674,ENSMUSP00000023024,ENSMUSP00000023779,ENSMUSP00000025718,ENSMUSP00000025850,ENSMUSP00000026999,ENSMUSP00000031540,ENSMUSP00000035101,ENSMUSP00000037042,ENSMUSP00000038532,ENSMUSP00000041053,ENSMUSP00000044395,ENSMUSP00000046787,ENSMUSP00000053092,ENSMUSP00000057815,ENSMUSP00000060275,ENSMUSP00000061524,…	Ankrd1,Arnt2,Creb5,Csrnp1,Dbp,Egr1,Egr2,Egr3,Etv1,Fos,Fosl1,Hist1h1d,Ier2,Jun,Junb,Klf2,Klf6,Mnda,Nr1d1,Nr1d2,Nr1h4,Nr3c2,Nr4a1,Nr6a1,Oasl1,Per1,Per2,Pias1,Rad52,Smad7,Sp100,Sp110,Tbr1,Tef,Trim30a,Usf1,Zfp322a,Zfp36,Zfp36l1

## Sheet: CC
#term ID	term description	observed gene count	background gene count	false discovery rate	matching proteins in your network (IDs)	matching proteins in your network (labels)
GO:0035976	transcription factor AP-1 complex	3	4	0.0283	ENSMUSP00000021674,ENSMUSP00000064680,ENSMUSP00000102711	Fos,Jun,Junb
